# Supplementary material for: Widely Targeted Metabolomic Analysis Revealed the Diversity in Milk from Goats, Sheep, Cows, and Buffaloes and Its Association with Flavor Profiles
Source: MDPI journal article supplement (doi:10.3390/foods13091365), 2024-04-28
Supplement: s1 [file s1]

Supplementary Materials for

**Widely targeted metabolomics analysis identified characteristic  
flavor compounds in the milk from goats, sheep, cows, and buffaloes**

Fuhong Zhang *et al.*

\*Corresponding author. Email: [luojun@nwafu.edu.cn](mailto:luojun@nwafu.edu.cn)

**This PDF file includes:**

Supplementary Text  
Figures. S1 to S2  
Tables. S1 to S9

## Supplementary Figures

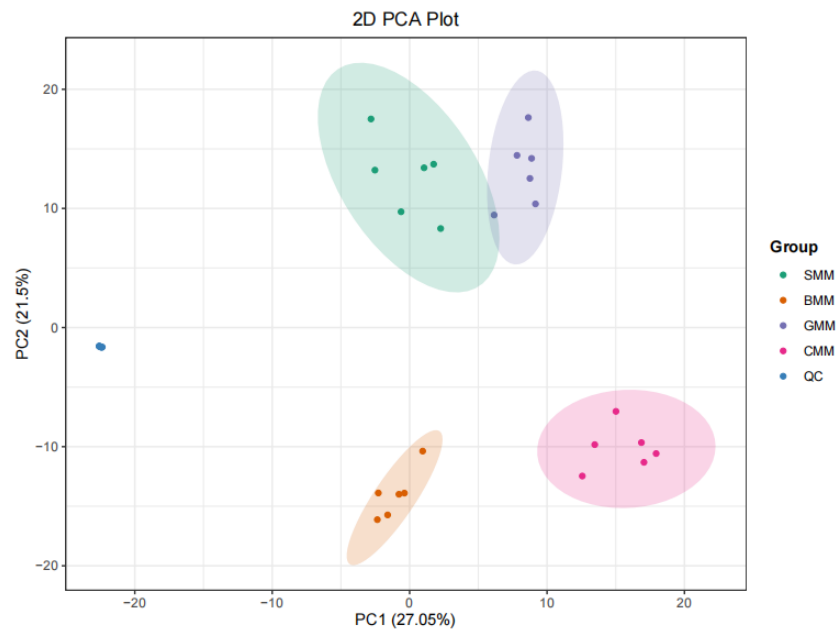

Figure S1. Principal component analysis of the metabolites of four type milk samples. Equal milk samples were mixed and used as quality control (QC).

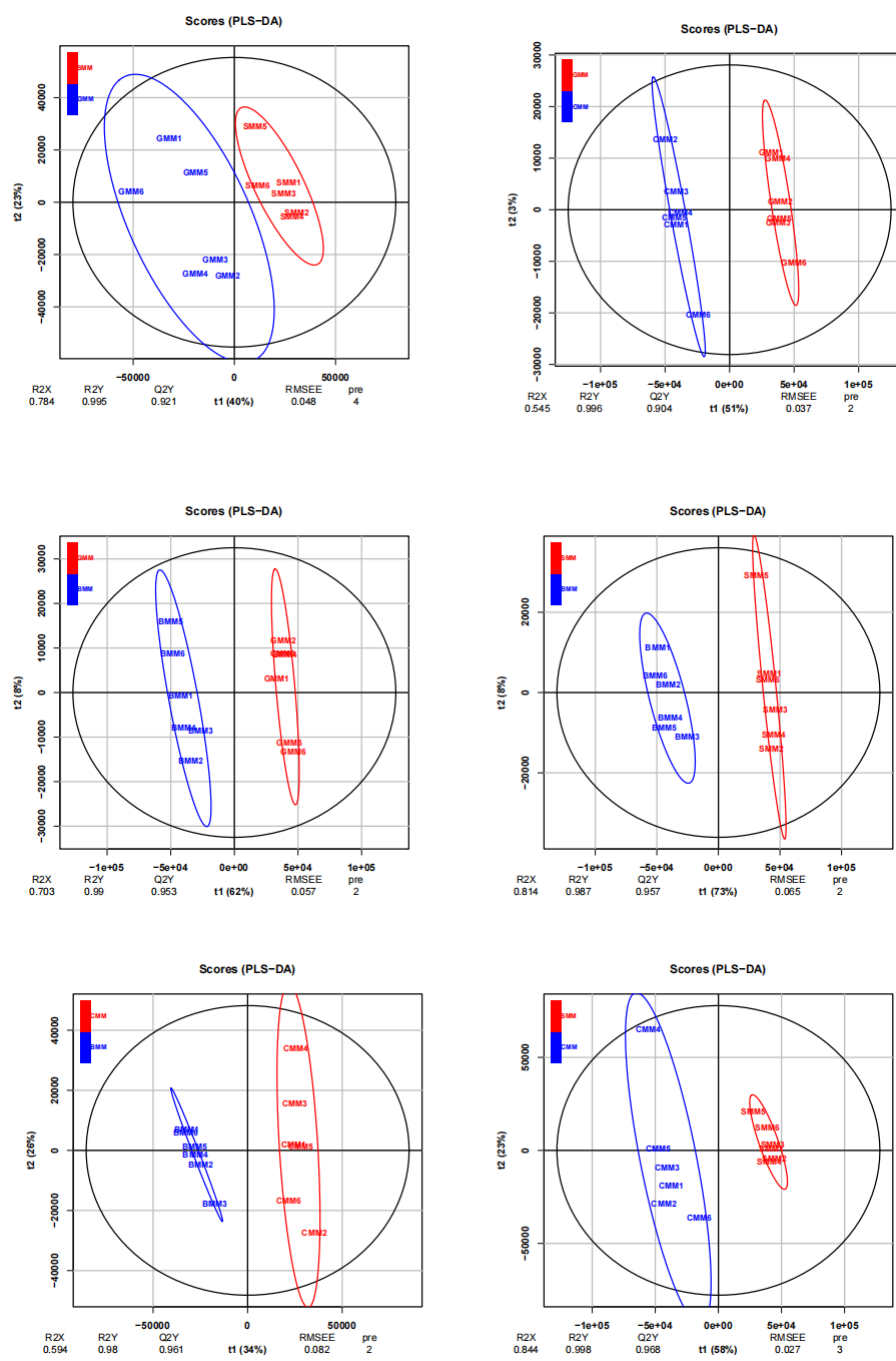

Figure S2. PLS-DA plots exhibiting discernible metabolic disparities among milk samples.

## Supplementary Tables

**Table S1. A total of 631 metabolites were identified and annotated.**

(Excel table)

**Table S2. Correlation coefficient between samples.**

(Excel table)

**Table S3. The results of K-Means cluster analysis.**

(Excel table)

**Table S4. The results of differential metabolite screening between GMMs and SMMs.**

(Excel table)

**Table S5. The results of differential metabolite screening between GMMs and CMMs.**

(Excel table)

**Table S6. The results of differential metabolite screening between GMMs and BMMs.**

(Excel table)

**Table S7. The results of differential metabolite screening between CMMs and BMMs.**

(Excel table)

**Table S8. The results of differential metabolite screening between CMMs and SMMs.**

(Excel table)

**Table S9. The results of differential metabolite screening between SMMs and BMMs.**
