# Supplementary material for: Widely Targeted Metabolomic Analysis Revealed the Diversity in Milk from Goats, Sheep, Cows, and Buffaloes and Its Association with Flavor Profiles
Source: Foods. 2024 Apr 28;13(9):1365. doi: 10.3390/foods13091365 (PMC11083174; doi:10.3390/foods13091365)
Supplement: Supplementary file 1 [file foods-13-01365-s001.zip › Supplementary Tables. S1to S9 (Excel table).xls]

## Sheet: ST_INDEX
	TAB	TABLE	TITLE
	ST_INDEX	Supplementary Table Index	-
	ST1	Supplementary Table1	A total of 631 metabolites were identified and annotated.
	ST2	Supplementary Table2	Correlation coefficient between samples.
	ST3	Supplementary Table3	The results of K-Means cluster analysis
	ST4	Supplementary Table4	The results of differential metabolite screening between GMMs and SMMs.
	ST5	Supplementary Table5	The results of differential metabolite screening between GMMs and CMMs.
	ST6	Supplementary Table6	The results of differential metabolite screening between GMMs and BMMs.
	ST7	Supplementary Table7	The results of differential metabolite screening between CMMs and BMMs.
	ST8	Supplementary Table8	The results of differential metabolite screening between CMMs and SMMs.
	ST9	Supplementary Table9	The results of differential metabolite screening between SMMs and BMMs.

## Sheet: ST1
Table S1. A total of 631 metabolites were identified and annotated
Index	Compounds	物质	Class I	物质一级分类	Class II	物质二级分类	Q1 (Da)	Molecular weight (Da)	Ionization model	Formula	SMM1	SMM2	SMM3	SMM4	SMM5	SMM6	BMM1	BMM2	BMM3	BMM4	BMM5	BMM6	GMM1	GMM2	GMM3	GMM4	GMM5	GMM6	CMM1	CMM2	CMM3	CMM4	CMM5	CMM6	QC01	QC02	QC03	QC04	QC05	QC06	cpd_ID	HMDB	PubChem CID	CAS	ChEBI	Metlin	kegg_map
MEDN1709	2-Octanamidoacetic acid	正辛基甘氨酸	Amino acid and Its metabolites	氨基酸及其代谢物	Amino acids	氨基酸	200.1	201.136	[M-H]-	C10H19NO3	15537.3	14611.7	15143.4	96302.6	35169.8	46062	7791.86	9217.69	4667.65	7106.18	4690.21	7117.95	111032	26829.3	19371.1	11419.9	14218.2	92813	5443	6973.87	4679.64	29231.7	5632.18	4389.79	20419.4	20159.4	20424.2	20284.1	20390.3	20285.8	-	HMDB0000832	84290	14246-53-8	74099	5795	-
MEDP2529	D-Allo-Isoleucine	别异亮氨酸	Amino acid and Its metabolites	氨基酸及其代谢物	Amino acids	氨基酸	132.1	131.095	[M+H]+	C6H13NO2	2.80539e+06	1.20177e+07	1.21629e+07	3.87253e+06	3.37105e+06	4.48798e+06	1.47327e+07	1.24358e+07	1.05141e+07	1.23254e+07	1.00098e+07	1.15221e+07	6.72801e+06	3.73938e+06	4.23944e+06	4.00672e+06	9.67045e+06	1.5493e+07	1.89216e+06	1.43048e+06	3.10435e+06	3.92011e+06	2.08925e+06	1.41945e+06	2.74457e+07	2.6935e+07	2.71004e+07	2.67765e+07	2.73136e+07	2.73125e+07	C21092	-	94206	1509-35-9	-	-	-
MEDP0002	D-Homocysteine	D-高半胱氨酸	Amino acid and Its metabolites	氨基酸及其代谢物	Amino acids	氨基酸	136	135.035	[M+H]+	C4H9NO2S	51247.6	84384.1	92682.3	94326.4	54133.1	62323.4	143560	127943	5.84973	90225.9	74648	77911.7	19361.8	119639	36059.8	43817.1	41966.7	112598	0.784545	0.734245	0.725882	0.714881	0.738505	0.717192	148756	133599	148770	140941	144283	144292	C00155	HMDB0000742	778	454-29-5	17588	3256	ko00270,ko00920,ko01100,ko01230,ko01523,ko04621
MEDP2003	D-Ornithine	D-鸟氨酸	Amino acid and Its metabolites	氨基酸及其代谢物	Amino acids	氨基酸	133.1	132.09	[M+H]+	C5H12N2O2	106169	411119	466122	272992	123985	330288	77081.1	83096.5	155505	87119.2	5.81109	133413	418920	318748	310715	344992	129978	487206	47341.9	92295.4	147105	56975.3	37715.6	91485.5	241794	228510	241487	230612	242954	232042	C00515	-	71082	348-66-3	-	-	ko00470,ko01100
MEDP1061	L-Phenylalanine	L-苯丙氨酸	Amino acid and Its metabolites	氨基酸及其代谢物	Amino acids	氨基酸	166.1	165.079	[M+H]+	C9H11NO2	2.42873e+08	2.65496e+08	2.93127e+08	2.40885e+08	258386214	2.47863e+08	3.10526e+08	2.75178e+08	2.87919e+08	2.78253e+08	2.76635e+08	292377490	248794170	2.76669e+08	244069364	2.38252e+08	2.38132e+08	2.98799e+08	220523792	2.50722e+08	2.54542e+08	2.47583e+08	2.50195e+08	2.01702e+08	4.24752e+08	4.24777e+08	4.21428e+08	4.2409e+08	4.2409e+08	4.22266e+08	C00079	HMDB0000159	6140	63-91-2	17295	28	ko00360,ko00400,ko00470,ko00970,ko01100,ko01210,ko01230,ko02010,ko04974,ko04978,ko05230
MEDP0013	L-Alanine	L-丙氨酸	Amino acid and Its metabolites	氨基酸及其代谢物	Amino acids	氨基酸	90	89.048	[M+H]+	C3H7NO2	823667	1.3892e+06	3.2573e+06	3.6738e+06	1.37696e+06	2.51811e+06	2.57509e+06	3.01074e+06	3.66215e+06	5.65648e+06	3.88884e+06	5.99515e+06	1.38671e+06	2.50021e+06	2.07644e+06	2.47715e+06	2.3865e+06	3.29274e+06	3.77647e+06	4.93279e+06	4.39937e+06	4.37619e+06	5.15814e+06	4.14865e+06	3.57401e+06	3.42357e+06	3.57054e+06	3.32409e+06	3.58536e+06	3.61122e+06	C00041	HMDB0000161	5950	56-41-7	16977	-	ko00250,ko00270,ko00430,ko00450,ko00470,ko00970,ko01100,ko01200,ko01230,ko02010,ko04122,ko04974,ko04978,ko05230
MEDN0007	L-Arginine	L-精氨酸	Amino acid and Its metabolites	氨基酸及其代谢物	Amino acids	氨基酸	173.1	174.112	[M-H]-	C6H14N4O2	153738	653712	374234	194095	69973.7	446193	106745	87691.2	93963.9	81932.4	53147.4	67341.4	341147	240918	219033	112798	156966	323864	65874.8	84136.9	99715.9	97194.1	67328.1	77981.5	564489	564627	547014	563779	563744	524981	C00062	HMDB0000517	6322	74-79-3	16467	5502	ko00220,ko00261,ko00330,ko00470,ko00970,ko01100,ko01230,ko02010,ko04150,ko04974,ko05014,ko05022,ko05142,ko05146,ko05230
MEDN0009	L-Aspartic Acid	L-天冬氨酸	Amino acid and Its metabolites	氨基酸及其代谢物	Amino acids	氨基酸	132	133.038	[M-H]-	C4H7NO4	576092	466165	594924	644706	214037	529050	3.33971e+06	1.41611e+06	446101	774298	520383	2.06163e+06	664799	584336	501220	337164	479686	660162	5.00256	5.00256	5.00256	5.00256	5.00256	5.00256	643913	643833	648616	658462	628101	653717	C00049	HMDB0000191	5960	56-84-8	17053	5206	ko00220,ko00250,ko00260,ko00261,ko00270,ko00300,ko00340,ko00410,ko00470,ko00760,ko00770,ko00970,ko01100,ko01200,ko01210,ko01230,ko01240,ko02010,ko04080,ko04974,ko05230
MEDN0010	L-Citrulline	L-瓜氨酸	Amino acid and Its metabolites	氨基酸及其代谢物	Amino acids	氨基酸	174.1	175.096	[M-H]-	C6H13N3O3	59641	764774	700241	244307	9656.49	2.17038e+06	379427	505496	192933	132829	194736	313276	2.55621e+06	2.25988e+06	1.75696e+06	912505	281178	3.0108e+06	122809	547986	539297	524023	444011	210362	754129	717925	754024	717690	747053	748115	C00327	HMDB0000904	9750	372-75-8	16349	16	ko00220,ko01100,ko01230
MEDP0387	L-Homoarginine	高精氨酸	Amino acid and Its metabolites	氨基酸及其代谢物	Amino acids	氨基酸	189	188.127	[M+H]+	C7H16N4O2	84609.5	276025	180656	169420	59077.6	191636	96829.1	80500.5	55726.8	80825.5	17578	64539.5	75699.7	56637.3	156630	71074.7	12224.6	115925	33298.2	9.2899	38621.7	28163.3	141437	44408.4	102399	100545	100203	97144.8	103938	98497.5	C01924	HMDB0000670	9085	156-86-5	27747	5640	-
MEDN0047	L-Homocitrulline	L-高瓜氨酸	Amino acid and Its metabolites	氨基酸及其代谢物	Amino acids	氨基酸	188.1	189.111	[M-H]-	C7H15N3O3	6948.38	19686.1	70998.7	51563.4	6.74506	13351.2	19453.4	20850.6	8343.14	3413.07	2006.54	24316.2	18205.7	20685.9	9046.59	9980.23	3473.76	21970.5	1384.01	4.20543	4607.85	3225.51	4.20543	1689.9	23999.1	23611.8	23612.1	23886.2	23917.8	23266.8	C02427	HMDB0000679	65072	1190-49-4	17443	46	-
MEDP0020	L-Methionine	L-蛋氨酸	Amino acid and Its metabolites	氨基酸及其代谢物	Amino acids	氨基酸	150	149.051	[M+H]+	C5H11NO2S	26049.5	107324	115098	35517.3	32050.8	65747.7	50754.1	35457.8	77841.7	78825.3	140448	52408.1	28529.2	33285.9	46457.1	42081.2	86930.1	61037.4	24361	7842.19	20294.1	4645.9	39695.3	10641.2	170242	179665	179092	172667	172692	181982	C00073	HMDB0000696	6137	63-68-3	16643	5664	ko00270,ko00470,ko00970,ko01100,ko01210,ko01230,ko01240,ko01523,ko04974,ko04978,ko05230
MEDP0519	L-Norleucine	L-正亮氨酸	Amino acid and Its metabolites	氨基酸及其代谢物	Amino acids	氨基酸	132.1	131.095	[M+H]+	C6H13NO2	1.36571e+06	1.92765e+06	2.52572e+06	1.8418e+06	1.08288e+06	1.48634e+06	2.23658e+06	3.52025e+06	3.13794e+06	3.04057e+06	2.3919e+06	2.79948e+06	842882	2.23343e+06	1.07353e+06	1.09312e+06	795035	2.8342e+06	338334	444474	695371	395611	664178	419038	2.96606e+06	2.93344e+06	2.96561e+06	2.99743e+06	2.93505e+06	2.93591e+06	C01933	HMDB0001645	6334	327-57-1	18347	6334	-
MEDP1778	L-Norvaline	L-正缬氨酸	Amino acid and Its metabolites	氨基酸及其代谢物	Amino acids	氨基酸	118.1	117.079	[M+H]+	C5H11NO2	1.38648e+06	4.0668e+06	3.7878e+06	1.07943e+06	1.05683e+06	1.45444e+06	5.07214e+06	2.56721e+06	2.281e+06	3.0544e+06	2.32848e+06	2.64099e+06	3.35555e+06	628190	1.28511e+06	836479	3.72815e+06	1.92157e+06	461981	851251	551721	610055	448720	552250	3.57475e+06	3.69982e+06	3.56369e+06	3.67283e+06	3.57534e+06	3.67544e+06	C01826	-	65098	6600-40-4	-	-	-
Index	Compounds	物质	Class I	物质一级分类	Class II	物质二级分类	Q2 (Da)	Molecular weight (Da)	Ionization model	Formula	SMM2	SMM3	SMM4	SMM5	SMM6	SMM7	BMM2	BMM3	BMM4	BMM5	BMM6	BMM7	GMM2	GMM3	GMM4	GMM5	GMM6	GMM7	CMM2	CMM3	CMM4	CMM5	CMM6	CMM7	QC02	QC03	QC04	QC05	QC06	QC07	cpd_ID	HMDB	PubChem CID	CAS	ChEBI	Metlin	kegg_map
MEDN1710	3-Octanamidoacetic acid	正辛基甘氨酸	Amino acid and Its metabolites	氨基酸及其代谢物	Amino acids	氨基酸	147.213	146.852	[M-H]-	C10H19NO4	-2.14229e+06	-2.34605e+06	-2.5715e+06	-2.11062e+06	-2.57862e+06	-2.01648e+06	-2.60081e+06	-2.50144e+06	-2.7066e+06	-2.53942e+06	-2.68488e+06	-2.64929e+06	-1.89937e+06	-2.32169e+06	-2.17854e+06	-2.34071e+06	-2.2655e+06	-3.21651e+06	-2.30442e+06	-2.38088e+06	-2.63342e+06	-2.71305e+06	-2.48415e+06	-1.98306e+06	-5.6226e+06	-5.54345e+06	-5.55049e+06	-5.51367e+06	-5.60946e+06	-5.55808e+06	-	HMDB0000833	11638.2	14246-53-9	74100	5796	-
MEDP2529	D-Allo-Isoleucine	别异亮氨酸	Amino acid and Its metabolites	氨基酸及其代谢物	Amino acids	氨基酸	146.709	146.335	[M+H]+	C6H13NO3	-4.81206e+06	-5.39882e+06	-5.9379e+06	-4.80305e+06	-5.45455e+06	-4.77739e+06	-6.17962e+06	-5.68332e+06	-6.00605e+06	-5.77006e+06	-5.8644e+06	-6.0324e+06	-4.67968e+06	-5.38774e+06	-4.90519e+06	-5.01995e+06	-5.00489e+06	-6.76183e+06	-4.77637e+06	-5.16615e+06	-5.50023e+06	-5.52839e+06	-5.2848e+06	-4.23491e+06	-1.08007e+07	-1.07053e+07	-1.06838e+07	-1.0663e+07	-1.07778e+07	-1.07032e+07	C21092	-	9035.68	1509-35-10	-	-	-
MEDP0002	D-Homocysteine	D-高半胱氨酸	Amino acid and Its metabolites	氨基酸及其代谢物	Amino acids	氨基酸	146.205	145.818	[M+H]+	C4H9NO3S	-7.48184e+06	-8.45158e+06	-9.3043e+06	-7.49547e+06	-8.33048e+06	-7.53831e+06	-9.75844e+06	-8.86521e+06	-9.3055e+06	-9.00071e+06	-9.04392e+06	-9.41552e+06	-7.45998e+06	-8.45378e+06	-7.63185e+06	-7.6992e+06	-7.74428e+06	-1.03071e+07	-7.24833e+06	-7.95141e+06	-8.36703e+06	-8.34374e+06	-8.08546e+06	-6.48676e+06	-1.59788e+07	-1.58671e+07	-1.58171e+07	-1.58123e+07	-1.59462e+07	-1.58484e+07	C00155	HMDB0000743	6433.13	454-29-6	17589	3257	ko00270,ko00920,ko01100,ko01230,ko01523,ko04622
MEDP2003	D-Ornithine	D-鸟氨酸	Amino acid and Its metabolites	氨基酸及其代谢物	Amino acids	氨基酸	145.701	145.302	[M+H]+	C5H12N2O3	-1.01516e+07	-1.15043e+07	-1.26707e+07	-1.01879e+07	-1.12064e+07	-1.02992e+07	-1.33372e+07	-1.20471e+07	-1.26049e+07	-1.22314e+07	-1.22234e+07	-1.27986e+07	-1.02403e+07	-1.15198e+07	-1.03585e+07	-1.03784e+07	-1.04837e+07	-1.38525e+07	-9.72028e+06	-1.07367e+07	-1.12338e+07	-1.11591e+07	-1.08861e+07	-8.73862e+06	-2.11569e+07	-2.10289e+07	-2.09505e+07	-2.09616e+07	-2.11146e+07	-2.09936e+07	C00515	-	3830.57	348-66-4	-	-	ko00470,ko01101
MEDP1061	L-Phenylalanine	L-苯丙氨酸	Amino acid and Its metabolites	氨基酸及其代谢物	Amino acids	氨基酸	145.197	144.785	[M+H]+	C9H11NO3	-1.28214e+07	-1.45571e+07	-1.60371e+07	-1.28803e+07	-1.40823e+07	-1.30601e+07	-1.69161e+07	-1.5229e+07	-1.59044e+07	-1.5462e+07	-1.5403e+07	-1.61817e+07	-1.30206e+07	-1.45859e+07	-1.30852e+07	-1.30577e+07	-1.32231e+07	-1.73978e+07	-1.21922e+07	-1.35219e+07	-1.41006e+07	-1.39744e+07	-1.36868e+07	-1.09905e+07	-2.63349e+07	-2.61907e+07	-2.60838e+07	-2.61109e+07	-2.62829e+07	-2.61387e+07	C00079	HMDB0000159	1228.01	63-91-3	19578.9	29	ko00360,ko00400,ko00470,ko00970,ko01100,ko01210,ko01230,ko02010,ko04974,ko04978,ko05231
MEDP2320	N(6),N(6)-Dimethyl-L-lysine	N（6），N（6）-二甲基-L-赖氨酸	Amino acid and Its metabolites	氨基酸及其代谢物	Amino acids	氨基酸	175.1	174.137	[M+H]+	C8H18N2O2	168429	905779	687218	626606	65789.2	487945	2.57719	2.57719	2.57719	2.57719	2.57719	2.57719	7.10738	506413	571531	250639	121757	338786	50407.3	65734.9	36340.3	64045	62490	37623.6	261645	270147	261907	267147	262909	262867	-	-	56777362	2259-86-1	-	-	-
MEDP1996	N-Formylglycine	N-甲酰甘氨酸	Amino acid and Its metabolites	氨基酸及其代谢物	Amino acids	氨基酸	104	103.027	[M+H]+	C3H5NO3	1.23245e+06	1.38374e+06	1.6209e+06	4.18438e+06	3.01523e+06	1.27189e+06	1.95035e+06	1.2898e+06	1.25963e+06	1.05745e+06	1.34703e+06	1.62627e+06	812994	1.36041e+06	1.34593e+06	1.33651e+06	1.73034e+06	1.03656e+06	4.05743e+06	8.49746e+06	3.93928e+06	2.429e+06	6.25989e+06	8.148e+06	2.6705e+06	2.75216e+06	2.67192e+06	2.55157e+06	2.83942e+06	2.55714e+06	-	-	75606	2491-15-8	-	-	-
MEDP0074	N-Propionylglycine	丙甘氨酸	Amino acid and Its metabolites	氨基酸及其代谢物	Amino acids	氨基酸	132.1	131.058	[M+H]+	C5H9NO3	301745	216710	450375	339749	249711	171342	40854.4	24028.5	53144.7	56865.5	28974.2	57487	232287	841488	691935	660126	341604	590146	144001	160574	166604	242774	325044	166604	199346	199354	196744	196744	199222	200390	-	HMDB0000783	98681	21709-90-0	89836	5749	-
MEDP1005	β-Alanine	β-氨基丙酸	Amino acid and Its metabolites	氨基酸及其代谢物	Amino acids	氨基酸	90	89.048	[M+H]+	C3H7NO2	823667	1.3892e+06	3.2573e+06	3.6738e+06	1.37696e+06	2.51811e+06	2.57509e+06	3.01074e+06	3.66215e+06	5.65648e+06	3.88884e+06	5.99515e+06	1.38671e+06	2.50021e+06	2.07644e+06	2.47715e+06	2.3865e+06	3.29274e+06	3.77647e+06	4.93279e+06	4.39937e+06	4.37619e+06	5.15814e+06	4.14865e+06	3.57401e+06	3.42357e+06	3.57054e+06	3.32409e+06	3.58536e+06	3.61122e+06	C00099	HMDB0000056	239	107-95-9	16958	5119	ko00240,ko00410,ko00640,ko00770,ko01100,ko01240,ko04080,ko04974
MEDP1307	(2S,3S)-3-methylphenylalanine	(2S,3S)-3-甲基苯丙氨酸	Amino acid and Its metabolites	氨基酸及其代谢物	Amino acid derivatives	氨基酸衍生物	180.1	179.095	[M+H]+	C10H13NO2	338645	360962	411083	359084	346086	378089	384706	395252	410042	387400	357050	314545	476726	544752	584698	469135	448743	570334	321690	405498	374271	387714	417663	243918	324626	315417	324480	323648	319302	319469	C20895	-	854352	25488-25-9	-	-	-
MEDN2099	(2s)-2-Amino-4-sulfinobutanoic acid	（2s）-2-氨基-4-亚磺基丁酸	Amino acid and Its metabolites	氨基酸及其代谢物	Amino acid derivatives	氨基酸衍生物	166	167.025	[M-H]-	C4H9NO4S	21302.1	46216.6	65683.9	102037	169559	77073.1	8470.9	12834.9	13027	16483.3	13558	21048.1	44003.9	41273.7	62848.7	55799.9	21575.1	54406.1	78136.5	42969.5	33785	68880.6	47828.3	37923.4	46926.6	52706.7	46921.2	48620.9	48616.7	47650.1	-	-	75896	2686-70-6	-	-	-
MEDP1126	(R)-(-)-2-phenylglycine	(R)-(-)-2-苯基甘氨醇	Amino acid and Its metabolites	氨基酸及其代谢物	Amino acid derivatives	氨基酸衍生物	120.1	137.084	[M-H2O+H]+	C8H11NO	61061.4	50241.6	56608.6	64745.7	43333.3	60179.5	78646.8	89826	59443.9	50739.8	53435.9	60247.3	47481.5	37092.2	25479	32733.4	37841.7	31470.4	21737.4	37219.9	38969.9	36715.8	30354.8	31907.5	94017.2	93032.1	95421.2	91694.7	96192.6	96255.4	-	-	2724025	56613-80-0	-	-	-
MEDP2132	1-Aminocyclobutanecarboxylic acid	1-氨基-1-环丁烷羧酸	Amino acid and Its metabolites	氨基酸及其代谢物	Amino acid derivatives	氨基酸衍生物	116.1	115.063	[M+H]+	C5H9NO2	1.11887e+06	2.26447e+06	1.87424e+06	1.52105e+06	687636	2.33197e+06	2.30792e+07	1.18093e+07	1.89274e+07	6.62481e+06	3.88757e+07	3.45447e+07	6.92358e+06	4.58933e+06	3.84331e+06	2.55628e+06	1.29818e+07	7.18031e+06	5.92497e+06	8.05537e+06	6.44082e+06	9.23815e+06	1.32454e+07	4.61082e+06	6.76279e+06	6.763e+06	6.91568e+06	6.71002e+06	6.85393e+06	6.85525e+06	-	-	89643	22264-50-2	-	-	-
MEDP0147	1-Methylhistidine	1-甲基组氨酸	Amino acid and Its metabolites	氨基酸及其代谢物	Amino acid derivatives	氨基酸衍生物	170.1	169.085	[M+H]+	C7H11N3O2	639304	4.38187e+06	7.34777e+06	4.95959e+06	185864	2.58931e+06	1.7467e+06	1.71775e+06	1.51967e+06	1.18933e+06	616148	1.55762e+06	5.9187e+06	6.14523e+06	4.16694e+06	1.97843e+06	823140	9.92471e+06	7.47098	140774	165192	133756	177039	69022.8	2.00327e+06	1.98466e+06	2.00322e+06	1.97934e+06	2.00754e+06	2.00802e+06	C01152	HMDB0000001	92105	332-80-9	50599	3741	ko00340,ko01100
MEDP1974	1-Methylpiperidine-2-carboxylic acid	1-甲基哌啶-2-羧酸	Amino acid and Its metabolites	氨基酸及其代谢物	Amino acid derivatives	氨基酸衍生物	144.1	143.095	[M+H]+	C7H13NO2	7.63831e+06	8.09474e+06	7.09915e+06	4.08235e+06	3.16918e+06	4.24746e+06	1.81637e+06	1.82839e+06	3.75563e+06	1.92401e+06	1.92965e+06	3.40436e+06	4.22608e+06	8.01523e+06	6.26757e+06	7.04083e+06	9.48564e+06	9.00414e+06	3.78059e+06	5.49534e+06	5.32844e+06	5.02615e+06	6.02803e+06	6.77353e+06	4.44493e+06	4.52692e+06	4.52888e+06	4.59718e+06	4.43439e+06	4.44235e+06	-	-	415939	7730-87-2	-	-	-
MEDN0472	1-Methyluric Acid	1-甲基尿酸	Amino acid and Its metabolites	氨基酸及其代谢物	Amino acid derivatives	氨基酸衍生物	181	182.044	[M-H]-	C6H6N4O3	78836.7	104026	87288.7	99300.4	53556.4	73854.4	17.0258	17.0258	17.0258	17.0258	17.0258	17.0258	134512	130544	192732	110025	43444	71515.1	59194.4	108573	93395.8	58476	123731	62612	42137.9	38935.1	42350.5	41352	41352.2	41543	C16359	HMDB0003099	69726	708-79-2	68441	2821	ko00232
MEDP0617	2-Furoylglycine	N-(2-糠酰)甘氨酸	Amino acid and Its metabolites	氨基酸及其代谢物	Amino acid derivatives	氨基酸衍生物	170	169.038	[M+H]+	C7H7NO4	470436	359352	406344	314471	256416	193969	54481.5	40770.6	70163.4	53935.6	37177.9	55179.7	72156.3	462006	464164	287965	261655	205686	762699	929732	962741	453370	808131	608794	194219	194281	189831	194341	194294	189377	-	HMDB0000439	21863	5657-19-2	82912	5428	-
MEDP2533	2-Methylbutyrylglycine	2-甲基丁酰甘氨酸	Amino acid and Its metabolites	氨基酸及其代谢物	Amino acid derivatives	氨基酸衍生物	160.1	159.089	[M+H]+	C7H13NO3	238445	266885	335975	391520	417486	246879	116916	117679	106495	131278	110215	99039.6	754033	1.14607e+06	1.161e+06	1.21654e+06	748021	1.086e+06	1.14978e+06	1.13606e+06	1.81996e+06	3.9169e+06	2.53959e+06	1.15199e+06	318381	317814	341662	326234	326336	319224	-	HMDB0000339	193872	52320-67-9	86366	5328	-
MEDN1246	3-(pyrazol-1-yl)-L-alanine	3-(吡唑-1-基)-L-丙氨酸	Amino acid and Its metabolites	氨基酸及其代谢物	Amino acid derivatives	氨基酸衍生物	154.1	155.069	[M-H]-	C6H9N3O2	41033.8	423989	664878	223627	23726.7	217760	129801	109699	181870	102152	45224.8	145733	89736.2	82383.7	79989.5	76844	87264.3	232442	10040.4	24919.9	27689.3	38932.9	8127.1	31144.9	163875	162117	162140	160611	160787	172398	C01162	-	151491	2734-48-7	-	-	-
MEDN2103	3-Hydroxy-L-phenylalanine	3-羟基-L-苯丙氨酸	Amino acid and Its metabolites	氨基酸及其代谢物	Amino acid derivatives	氨基酸衍生物	180.1	181.074	[M-H]-	C9H11NO3	6312.03	28361.9	67584.8	27659.5	5951.55	20198.7	11361.5	8954.3	12629.4	10767.8	1923.6	15832.1	8855.6	35832.2	6913.81	9704.05	10076.3	39381.7	707.331	435.106	1492.52	455.684	633.145	734.256	59571.7	59573.9	59985.1	59361.1	60040.4	60047.1	C20807	-	6950578	587-33-7	-	-	-
MEDP0034	3-N-Methyl-L-Histidine	3-N-甲基-L-组氨酸	Amino acid and Its metabolites	氨基酸及其代谢物	Amino acid derivatives	氨基酸衍生物	170	187.096	[M-H2O+H]+	C7H13N3O3	229524	973447	1.75951e+06	729884	72356.2	726024	312916	231736	266963	159245	88976.7	247876	1.22362e+06	2.0099e+06	1.04414e+06	526681	226290	2.60332e+06	122005	113464	59578.3	187799	180153	88571.7	456722	446918	461889	449527	460345	460603	C01152	HMDB0000479	64969	368-16-1	27596	5466	ko00340,ko01100
MEDP1020	4-Hydroxyhippurate	4-羟基马尿酸	Amino acid and Its metabolites	氨基酸及其代谢物	Amino acid derivatives	氨基酸衍生物	196.1	195.053	[M+H]+	C9H9NO4	246845	240542	174340	174891	120293	123975	130107	168099	160054	158871	167066	154780	163073	523310	424343	374078	350746	195962	68634.4	74118.8	80332.9	17816.1	83460.4	68395.6	177604	177576	176057	176311	176625	177453	-	HMDB0013678	151012	2482-25-9	71018	-	-
MEDP0297	5-Aminovaleric Acid	5-氨基戊酸	Amino acid and Its metabolites	氨基酸及其代谢物	Amino acid derivatives	氨基酸衍生物	118.2	117.079	[M+H]+	C5H11NO2	40796.7	34944.2	28129.3	30520.5	16648.7	33993.1	5.75127	5.75127	5.75127	5.75127	5.75127	5.75127	51226	27668.1	42502.8	13180.2	22397.6	30299.4	19765.7	11861.1	26375.5	14500.2	10.6589	23717.2	21666.1	20210.6	21279	20624.6	21209	21209.8	C00431	HMDB0003355	138	660-88-8	15887	6902	ko00310,ko00330,ko00470,ko01100
MEDP0036	5-Oxoproline	5-氧化脯氨酸	Amino acid and Its metabolites	氨基酸及其代谢物	Amino acid derivatives	氨基酸衍生物	130	129.043	[M+H]+	C5H7NO3	1.51005e+07	2.41623e+07	4.074e+07	2.12456e+07	3.75249e+06	2.16004e+07	1.87522e+07	1.7496e+07	9.64328e+06	1.39748e+07	9.56517e+06	1.66134e+07	7.31405e+06	4.43593e+07	3.49957e+07	3.15796e+07	3.52525e+07	4.46901e+07	7.60084e+06	8.30332e+06	1.10627e+07	1.33245e+07	6.95332e+06	6.40819e+06	1.97965e+07	1.7351e+07	1.95358e+07	1.80725e+07	1.90221e+07	1.90219e+07	C02237	HMDB0000805	499	149-87-1	-	-	ko00470,ko01100
MEDN1518	Acetylvaline	乙酰缬氨酸	Amino acid and Its metabolites	氨基酸及其代谢物	Amino acid derivatives	氨基酸衍生物	158.1	159.09	[M-H]-	C7H13NO3	24056	20190.1	26251.1	27560.1	31965	34203.9	76915.2	72579.1	46854.9	73869.6	51520.1	66049	39914.7	53537.8	46019.4	71233.5	78107.2	60982.4	55262.5	25193.8	34939.6	31040.4	50829.4	55659.5	44162.8	44186.9	42789.3	42597.7	44284.6	44285.1	-	HMDB0011757	66789	96-81-1	-	-	-
MEDP0087	Ala-Lys	L-丙氨酰-赖氨酸	Amino acid and Its metabolites	氨基酸及其代谢物	Amino acid derivatives	氨基酸衍生物	218.1	217.14	[M+H]+	C9H19N3O3	4.68136e+06	3.23738e+06	5.98993e+06	2.92901e+06	4.91413e+06	2.86314e+06	2.54694e+06	2.13361e+06	1.91193e+06	1.90528e+06	1.89994e+06	2.35336e+06	3.29613e+06	3.54474e+06	2.78235e+06	2.94723e+06	4.58772e+06	4.29596e+06	1.93276e+06	1.35425e+06	2.83903e+06	2.52642e+06	1.59352e+06	1.68014e+06	2.81105e+06	2.83809e+06	2.84206e+06	2.81706e+06	2.81552e+06	2.8383e+06	-	HMDB0028692	7016106	6366-77-4	132403	-	-
MEDP1490	Cis-4-Hydroxy-D-Proline	顺式4-羟基-D-脯氨酸	Amino acid and Its metabolites	氨基酸及其代谢物	Amino acid derivatives	氨基酸衍生物	132	131.058	[M+H]+	C5H9NO3	1.90552e+06	1.91647e+06	3.67345e+06	1.82109e+06	272077	2.56992e+06	2.4292e+06	2.65267e+06	2.95989e+06	2.58588e+06	4.11136e+06	3.7782e+06	2.06364e+06	2.13963e+06	2.52555e+06	1.68684e+06	1.41822e+06	2.19692e+06	2.40337e+06	2.52081e+06	2.62845e+06	3.05207e+06	2.46089e+06	2.43766e+06	2.3439e+06	2.52887e+06	2.36691e+06	2.51219e+06	2.38939e+06	2.40663e+06	C03440	HMDB0060460	440014	2584-71-6	16231	-	ko00470,ko01100
MEDP2344	Cis-L-3-hydroxyproline	顺式-L-3-羟基脯氨酸	Amino acid and Its metabolites	氨基酸及其代谢物	Amino acid derivatives	氨基酸衍生物	132.1	131.058	[M+H]+	C5H9NO3	1.90552e+06	1.91647e+06	3.67345e+06	1.82109e+06	272077	2.56992e+06	2.4292e+06	2.65267e+06	2.95989e+06	2.58588e+06	4.11136e+06	3.7782e+06	2.06364e+06	2.13963e+06	2.52555e+06	1.68684e+06	1.41822e+06	2.19692e+06	2.40337e+06	2.52081e+06	2.62845e+06	3.05207e+06	2.46089e+06	2.43766e+06	2.3439e+06	2.52887e+06	2.36691e+06	2.51219e+06	2.38939e+06	2.40663e+06	C19706	-	7098652	567-35-1	-	-	ko00330
MEDP2528	Cycloleucine	环亮氨酸	Amino acid and Its metabolites	氨基酸及其代谢物	Amino acid derivatives	氨基酸衍生物	130.1	129.078	[M+H]+	C6H11NO2	3.56655e+07	3.53639e+07	50453387	2.01494e+07	3.09726e+06	2.41701e+07	17508949	1.33494e+07	9.1621e+06	1.13743e+07	9.89756e+06	1.64896e+07	3.34557e+07	2.60382e+07	2.05849e+07	1.91793e+07	1.45012e+07	3.36843e+07	4.2725e+06	8.21249e+06	8.52488e+06	1.3903e+07	7.73045e+06	5.70336e+06	2.07394e+07	2.04883e+07	1.52787e+07	2.0218e+07	1.93328e+07	2.0268e+07	C03969	HMDB0062225	2901	52-52-8	40547	-	-
MEDP1933	Cyclopentylglycine	环戊基甘氨酸	Amino acid and Its metabolites	氨基酸及其代谢物	Amino acid derivatives	氨基酸衍生物	144.1	143.095	[M+H]+	C7H13NO2	7.63831e+06	8.09474e+06	7.09915e+06	4.08235e+06	3.16918e+06	4.24746e+06	1.81637e+06	1.82839e+06	3.75563e+06	1.92401e+06	1.92965e+06	3.40436e+06	4.22608e+06	8.01523e+06	6.26757e+06	7.04083e+06	9.48564e+06	9.00414e+06	3.78059e+06	5.49534e+06	5.32844e+06	5.02615e+06	6.02803e+06	6.77353e+06	4.44493e+06	4.52692e+06	4.52888e+06	4.59718e+06	4.43439e+06	4.44235e+06	-	-	314101	2521-84-8	-	-	-
MEDP1973	D-Proline-betaine	脯氨酸甜菜碱	Amino acid and Its metabolites	氨基酸及其代谢物	Amino acid derivatives	氨基酸衍生物	144.1	144.092	[M]+	C7H14NO2+	5.24609e+06	5.42754e+06	2.72518e+06	2.10128e+06	2.38199e+06	2.47916e+06	1.89337e+06	2.15603e+06	3.20561e+06	2.14177e+06	2.19649e+06	2.47434e+06	1.70799e+06	6.59059e+06	1.52189e+06	3.281e+06	7.29821e+06	8.76802e+06	538623	850483	1.05072e+06	1.42471e+06	915932	786755	2.28427e+06	2013044	2.28579e+06	2.46977e+06	2.1602e+06	2.16107e+06	C08283	-	4479243	1195-94-4	-	-	-
MEDP0071	Gly-Leu	N-甘氨酰-L-亮氨酸	Amino acid and Its metabolites	氨基酸及其代谢物	Amino acid derivatives	氨基酸衍生物	189.1	188.116	[M+H]+	C8H16N2O3	1629.11	168.124	290.816	400.5	686.227	332.149	0.0870095	0.0870095	0.0870095	0.0870095	0.0870095	0.0870095	0.0594774	0.0594774	0.0594774	0.0594774	0.0594774	0.0594774	202.737	89.3394	116.246	167.363	60.9526	327.197	17562.9	17412.7	17412.4	17557	17418.6	17467.6	C02155	HMDB0000759	92843	869-19-2	73514	5727	-
MEDP0859	Gly-Phe	甘氨酰-苯丙氨酸	Amino acid and Its metabolites	氨基酸及其代谢物	Amino acid derivatives	氨基酸衍生物	223.2	222.1	[M+H]+	C11H14N2O3	4.34047	4.34047	4.34047	4.34047	4.34047	4.34047	41366.3	30717.8	89058	47661.6	25342.5	12227	1.34086	1.34086	1.34086	1.34086	1.34086	1.34086	26157.9	20155.5	21901.2	30153.7	13652	64470.6	73194.3	75911.2	73159.8	75806.4	75967.6	72500.6	-	HMDB0028848	92953	3321-03-7	-	-	-
MEDN0041	Hexanoyl Glycine	己酰甘氨酸	Amino acid and Its metabolites	氨基酸及其代谢物	Amino acid derivatives	氨基酸衍生物	172.1	173.105	[M-H]-	C8H15NO3	123594	109761	250176	695895	262068	425688	11371.3	23858.2	26839	14396.3	9447.49	27567.5	577400	487698	554351	265800	136932	941016	25667.5	28383.2	30078.9	205568	42961.7	24435.4	156214	158675	158622	157055	157053	158575	-	HMDB0000701	99463	24003-67-6	64390	5669	-
MEDN0323	Kynurenic Acid	犬尿酸	Amino acid and Its metabolites	氨基酸及其代谢物	Amino acid derivatives	氨基酸衍生物	188	189.043	[M-H]-	C10H7NO3	731167	1.04635e+06	930450	1.17599e+06	1.9917e+06	596639	984411	784428	614595	354196	502360	628879	791074	2.7803e+06	1.03422e+06	1.1498e+06	2.20091e+06	1.02099e+06	403216	341191	317830	276306	650398	656083	840669	843918	845018	848607	840891	840845	C01717	HMDB0000715	3845	492-27-3	18344	5683	ko00380,ko01100
MEDP0051	L-Cystathionine	L-胱硫醚	Amino acid and Its metabolites	氨基酸及其代谢物	Amino acid derivatives	氨基酸衍生物	223	222.067	[M+H]+	C7H14N2O4S	126782	115720	93582.8	127826	107461	101796	166309	126011	119930	162829	165169	118191	150047	260984	218598	199930	124312	210860	247687	337439	257584	186350	151281	233858	151752	134698	137155	143072	132633	143039	C02291	HMDB0000099	439258	56-88-2	17482	39	ko00260,ko00270,ko01100,ko01230,ko01240
MEDP2131	L-Isserine	L-异丝氨酸	Amino acid and Its metabolites	氨基酸及其代谢物	Amino acid derivatives	氨基酸衍生物	106	105.043	[M+H]+	C3H7NO3	71932.8	431976	430467	237488	199554	120624	184366	215412	253832	196300	163711	188824	147888	389176	241747	227218	44527.6	1.03289e+06	158253	188266	111761	119086	169935	216575	227470	221524	236446	234309	217350	234070	-	-	6999797	632-13-3	-	-	-
MEDP2322	L-NIO-hydrochloride	L-NIO盐酸盐	Amino acid and Its metabolites	氨基酸及其代谢物	Amino acid derivatives	氨基酸衍生物	174.1	173.116	[M+H]+	C7H15N3O2	42189.2	64810.9	58709.6	59178.3	51112.6	62693	63812.8	53468.7	43368.3	23.4659	23.4659	43268.6	71724.5	91115.7	98965.3	109024	109111	119315	113409	99971.3	99606.3	97783.9	81830.7	99910.5	106292	106776	96478	97680.6	105480	105028	-	-	107984	36889-13-1	-	-	-
MEDP2435	L-Phenylalaninol	L-苯丙氨醇	Amino acid and Its metabolites	氨基酸及其代谢物	Amino acid derivatives	氨基酸衍生物	152.1	151.1	[M+H]+	C9H13NO	9.95195	9.95195	9.95195	9.95195	9.95195	9.95195	17343.2	17746.9	90403.7	8846.91	40740.3	26767.1	16796.2	4773.6	20164.7	9135.84	4737.52	12277.8	167187	191362	99764.7	38408.2	131658	18664.1	22164.7	22169.4	21805.6	21656.9	22329.5	21696.1	-	-	447213	3182-95-4	-	-	-
MEDP0318	L-kynurenine	犬尿氨酸	Amino acid and Its metabolites	氨基酸及其代谢物	Amino acid derivatives	氨基酸衍生物	209.1	208.085	[M+H]+	C10H12N2O3	81045.2	583964	762232	199667	28657.9	141496	1.62898e+06	873366	687717	389790	437036	1.12636e+06	1.7421e+06	2.12073e+06	1.76785e+06	388842	2.63153e+06	2.21334e+06	134803	208176	199527	351370	244167	285164	562358	559690	558733	563039	563135	552109	C00328	HMDB0000684	161166	343-65-7	16946	72	ko00380,ko01100,ko01240,ko05143
MEDN1686	L-threo-3-Methylaspartate	L-苏式-3-甲基天冬氨酸	Amino acid and Its metabolites	氨基酸及其代谢物	Amino acid derivatives	氨基酸衍生物	146	147.053	[M-H]-	C5H9NO4	144013	1.52668e+06	3.19575e+06	1.34243e+06	5.13766	1.0242e+06	1.36705e+07	1.08139e+07	4.82797e+06	9.22294e+06	4.97172e+06	1.04645e+07	3.39065e+06	2.00577e+06	1.93508e+06	3.06561e+06	1.65632e+06	3.96898e+06	6.54659e+06	2.52116e+07	2.16052e+07	7.76857e+07	3.49359e+07	1.42338e+07	3.64976e+06	3.64928e+06	3.74771e+06	3.74686e+06	3.73559e+06	3.00345e+06	C03618	-	440064	6061-13-8	-	-	ko00630,ko00660,ko01100,ko01200
MEDN1200	L-tyrosine methyl ester 4-sulfate	L-酪氨酸甲酯4-硫酸盐	Amino acid and Its metabolites	氨基酸及其代谢物	Amino acid derivatives	氨基酸衍生物	274	275.046	[M-H]-	C10H13NO6S	400778	695905	538306	460758	743542	641901	483154	583283	590808	298770	281024	326619	355848	1.13528e+06	963339	807315	569847	387981	240129	101084	183279	35110.8	234675	191142	876166	876111	882631	871309	872236	886476	C04201	-	440256	-	-	-	-
MEDP1663	N,N-Dimethylarginine	N，N-二甲基精氨酸	Amino acid and Its metabolites	氨基酸及其代谢物	Amino acid derivatives	氨基酸衍生物	203.1	202.143	[M+H]+	C8H18N4O2	360789	989652	1.18962e+06	668143	146979	650220	205828	279560	323351	89201	131006	310453	686874	491890	1.25439e+06	457914	207710	820668	91268.9	103031	100853	212746	161233	136155	426063	429585	405905	422239	414123	412678	C03626	HMDB0001539	123831	30315-93-6	17929	6309	-
MEDP1914	N-(1-Deoxy-1-fructosyl)phenylalanine	N-1-氧化果糖苯丙氨酸	Amino acid and Its metabolites	氨基酸及其代谢物	Amino acid derivatives	氨基酸衍生物	328.14	327.131	[M+H]+	C15H21NO7	114230	86320	131176	109535	116910	135927	109715	134287	127727	138904	87607.6	116266	128372	167979	138964	105769	121854	159330	111115	146434	141398	160707	108220	98276.5	56083.6	52652	53853.2	47982.8	55586	55579	-	HMDB0037846	101039148	87251-83-0	-	-	-
MEDP1962	N-(3-Indolylacetyl)-L-alanine	N-(3-吲哚乙酰基)-L-丙氨酸	Amino acid and Its metabolites	氨基酸及其代谢物	Amino acid derivatives	氨基酸衍生物	247.1	246.1	[M+H]+	C13H14N2O3	295921	358155	268676	306681	243489	363644	253994	322601	261444	343888	332847	274818	1.23414e+06	2.5276e+06	2.41677e+06	1.10121e+06	1.47419e+06	923512	346476	281815	288881	191498	887162	493965	263686	253940	264827	255810	270786	255389	-	-	-	57105-39-2	-	-	-
MEDN1659	N-AcetyTryptophan	N-乙酰-色氨酸	Amino acid and Its metabolites	氨基酸及其代谢物	Amino acid derivatives	氨基酸衍生物	245.1	246.1	[M-H]-	C13H14N2O3	16976.2	53279.6	37251.5	54600.9	14380.1	24578.2	20.7785	20.7785	20.7785	20.7785	20.7785	20.7785	140404	253057	208258	97479.8	97916.3	62602	30698.8	21511.1	21788.7	15531.8	73446.6	53571.8	35405.6	33738.3	35445.7	34771.1	34632.2	34770.6	C03137	-	439917	2280-01-5	-	-	-
MEDN2002	N-Acetyl-L-Glutamic Acid	N-乙酰-L-谷氨酸	Amino acid and Its metabolites	氨基酸及其代谢物	Amino acid derivatives	氨基酸衍生物	188.1	189.064	[M-H]-	C7H11NO5	23.2755	23.2181	23.5281	23.527	23.5384	23.5318	69268.4	100289	76475.5	82162	46704.7	106323	35181.4	26855.3	34439.1	24958.1	22736.7	51014.3	20841.7	25243	11510.2	25353.2	21765.6	27468.1	28963.2	29782	29374.6	28281	31550.4	27921.9	C00624	HMDB0001138	70914	1188-37-0	17533	-	ko00220,ko01100,ko01210,ko01230
MEDN0056	N-Acetyl-L-Leucine	N-乙酰基亮氨酸	Amino acid and Its metabolites	氨基酸及其代谢物	Amino acid derivatives	氨基酸衍生物	172.1	173.105	[M-H]-	C8H15NO3	8742.64	8907.45	6072.43	5644.21	9500.33	5872.46	17988.5	8926.91	12363.2	9917.04	19870.3	10691.8	16851	8537.38	9672.18	10875.9	15217.5	19227.9	3.62014	3.62014	3.62014	3.62014	3.62014	3.62014	13583.9	13583.4	13500.5	13812.3	13200.8	13184.4	C02710	HMDB0011756	70912	1188-21-2	17786	-	-
MEDP0525	N-Acetyl-L-alanine	N-乙酰基-L-丙氨酸	Amino acid and Its metabolites	氨基酸及其代谢物	Amino acid derivatives	氨基酸衍生物	132.1	131.058	[M+H]+	C5H9NO3	301745	216710	450375	339749	249711	171342	40854.4	24028.5	53144.7	56865.5	28974.2	57487	232287	841488	691935	660126	341604	590146	144001	160574	166604	242774	325044	166604	199346	199354	196744	196744	199222	200390	-	HMDB0000766	88064	97-69-8	40992	5733	-
MEDN1784	N-Acetyl-L-tryptophanamide	N-乙酰-L-色氨酸酰胺	Amino acid and Its metabolites	氨基酸及其代谢物	Amino acid derivatives	氨基酸衍生物	244.1	245.116	[M-H]-	C13H15N3O2	14.2321	14.2321	14.2321	14.2321	14.2321	14.2321	45875.1	94860.3	69229.2	62327.5	48447.2	54452.7	23743.7	28398.9	24420	23152.1	23883.1	36774.1	114842	48845.2	70750.4	132056	101233	69135.9	41840.2	42576.4	41867.1	43988.9	41466.7	41540.2	D70379	-	94230	2382-79-8	-	-	-
MEDP0064	N-Acetylcysteine	N-乙酰半胱氨酸	Amino acid and Its metabolites	氨基酸及其代谢物	Amino acid derivatives	氨基酸衍生物	164	163.03	[M+H]+	C5H9NO3S	212549	187781	173663	210203	168419	203524	239753	219886	197146	189624	194395	223348	279861	265126	284298	263911	231746	260288	295677	297047	362556	270663	276646	268336	174181	184217	184043	183437	176633	176805	C06809	HMDB0001890	12035	616-91-1	28939	784	-
MEDN0058	N-Acetylneuraminic Acid(SA)	N-乙酰神经氨酸	Amino acid and Its metabolites	氨基酸及其代谢物	Amino acid derivatives	氨基酸衍生物	308.1	309.106	[M-H]-	C11H19NO9	823627	1.48429e+06	766101	883437	2.76238e+06	914184	1.28671e+07	1.27107e+07	1.6864e+07	3.7631e+07	1.85573e+07	1.51416e+07	6.55702e+06	2.51782e+06	2.24153e+06	4.37781e+06	7.53427e+06	4.62508e+06	2.70685e+07	1.05661e+07	1.68624e+07	1.51042e+07	2.54819e+07	1.81722e+07	8.30422e+06	8.31018e+06	8.03809e+06	8.11858e+06	8.32381e+06	8.32131e+06	C19910	HMDB0000230	445063	131-48-6	45744	3321	-
MEDP0880	N-Alpha-Acetyl-L-Asparagine	N-α-乙酰基-L-天冬酰胺	Amino acid and Its metabolites	氨基酸及其代谢物	Amino acid derivatives	氨基酸衍生物	175.3	174.064	[M+H]+	C6H10N2O4	128190	543280	315429	271183	63672	266506	151086	64311.9	79773.9	54230.3	42080.9	60302.3	117042	105012	81115.3	22911.5	58579.3	105507	31254.2	25222.1	34052.6	53322.2	35034.9	25969.9	400099	398465	392665	391419	390270	410251	-	HMDB0006028	99715	4033-40-3	-	-	-
MEDN0843	N-Amidino-L-Aspartate	N-脒基-L-天门冬氨酸	Amino acid and Its metabolites	氨基酸及其代谢物	Amino acid derivatives	氨基酸衍生物	174.1	175.059	[M-H]-	C5H9N3O4	10172.7	60196.6	28257	25387.7	8379.52	30688.5	13593.6	7913.4	11122.7	11142.9	4109.28	5449.2	16698.5	16733.1	11980.9	2848.06	7985.45	17732.3	3042.34	4581.32	2216.65	6945.1	3103.4	2705.42	36231.7	37477.1	37728.3	36732.2	37582.8	36469.2	C03139	HMDB0003157	439918	6133-30-8	17072	10	-
MEDP2346	N-Ethylglycine	N-乙基甘氨酸	Amino acid and Its metabolites	氨基酸及其代谢物	Amino acid derivatives	氨基酸衍生物	104.1	103.063	[M+H]+	C4H9NO2	2.99022e+06	2.84708e+06	2.75142e+06	8.2318e+06	6.57465e+06	1.85421e+06	2.51699e+06	1.69015e+06	1.42454e+06	1.6685e+06	1.91812e+06	3.03652e+06	1.49867e+06	1.42992e+06	1.87274e+06	1.33325e+06	2.16895e+06	1.3054e+06	6.00132e+06	12359122	4.99797e+06	3.47272e+06	8.12377e+06	1.03542e+07	2.63749e+06	2.741e+06	2.73195e+06	2.80278e+06	2.65832e+06	2.65914e+06	C11735	HMDB0041945	316542	627-01-0	15620	-	-
MEDP1942	N-MethyTrans-4-Hydroxy-Proline	N-甲基-反式-4-羟基-脯氨酸	Amino acid and Its metabolites	氨基酸及其代谢物	Amino acid derivatives	氨基酸衍生物	146.1	145.074	[M+H]+	C6H11NO3	154784	141645	211111	283543	230239	224469	229137	175852	179319	178236	163090	172776	76931.1	138423	147534	167875	191421	113156	149476	125622	145548	176556	152615	128736	158290	155129	171976	163048	168861	162937	D96820	-	11768700	4252-82-8	-	-	-
MEDP0878	N-Methyl-L-Glutamate	N-甲基-L-谷氨酸	Amino acid and Its metabolites	氨基酸及其代谢物	Amino acid derivatives	氨基酸衍生物	162.3	161.069	[M+H]+	C6H11NO4	331932	1.10171e+06	758654	243073	46444	329640	256531	139768	162319	230913	129623	201145	211169	183075	337228	272958	577713	266704	310616	375651	270405	600038	327771	295373	319959	319830	288882	321950	304034	322868	C01046	HMDB0062660	439377	35989-16-3	16440	-	ko01100
MEDP0868	N-Methylalanine	N-甲基丙氨酸	Amino acid and Its metabolites	氨基酸及其代谢物	Amino acid derivatives	氨基酸衍生物	104	103.063	[M+H]+	C4H9NO2	2.99022e+06	2.84708e+06	2.75142e+06	8.2318e+06	6.57465e+06	1.85421e+06	2.51699e+06	1.69015e+06	1.42454e+06	1.6685e+06	1.91812e+06	3.03652e+06	1.49867e+06	1.42992e+06	1.87274e+06	1.33325e+06	2.16895e+06	1.3054e+06	6.00132e+06	12359122	4.99797e+06	3.47272e+06	8.12377e+06	1.03542e+07	2.63749e+06	2.741e+06	2.73195e+06	2.80278e+06	2.65832e+06	2.65914e+06	C02721	HMDB0094692	5288725	3913-67-5	17519	-	-
MEDN1861	N-Myristoylglycine	N-肉豆蔻酰甘氨酸	Amino acid and Its metabolites	氨基酸及其代谢物	Amino acid derivatives	氨基酸衍生物	284.2	285.23	[M-H]-	C16H31NO3	52147	44020.4	49770.6	52669	64369.3	47832.5	43100.9	47793.5	46070.3	50336.4	48152.4	44074	39434.4	40888.7	38503	37164.9	41743.2	34926.1	33139.2	54519.8	31364.8	37129.4	36719.2	53927.6	52534.3	52235.2	52379.1	52712.9	52045.5	52695.7	-	HMDB0013250	72348	14246-55-0	87142	-	-
MEDN1410	N-Palmitoylglycine	N-棕榈酰甘氨酸	Amino acid and Its metabolites	氨基酸及其代谢物	Amino acid derivatives	氨基酸衍生物	312.3	313.262	[M-H]-	C18H35NO3	130902	139569	131332	135903	138710	132286	144704	136133	153524	133342	147986	135889	151435	158046	147261	141193	140721	146890	142114	158868	133300	159597	148015	139575	137451	131708	131433	134750	134519	135430	D76997	HMDB0013034	151008	2441-41-0	479285	-	-
MEDN0827	N-acetylornithine	N-乙酰基-鸟氨酸	Amino acid and Its metabolites	氨基酸及其代谢物	Amino acid derivatives	氨基酸衍生物	173.1	174.1	[M-H]-	C7H14N2O3	162246	718863	449178	299397	55328.5	465936	127395	87294.6	115665	89609.1	63931.3	102582	249903	264432	143855	106252	144069	339222	60517.8	95932.6	110147	102103	61048.7	62324.6	553950	558332	562103	559948	559977	554701	C00437	HMDB0003357	439232	6205-08-9	16543	-	ko00220,ko01100,ko01210,ko01230
MEDN1915	N-ethylene glycol neuraminic acid	N-乙二醇神经氨酸	Amino acid and Its metabolites	氨基酸及其代谢物	Amino acid derivatives	氨基酸衍生物	324.1	325.101	[M-H]-	C11H19NO10	3.89696e+06	1.008e+07	7.0356e+06	6.15285e+06	3.59818e+06	6.99608e+06	91458.3	42494.8	85819.9	195268	165191	68852	4.753e+06	3.76942e+06	2.16556e+06	2.71235e+06	4.6206e+06	3.99659e+06	222942	89412.5	139879	290718	241263	249855	3.8119e+06	3.8165e+06	3.94086e+06	3.88681e+06	3.88799e+06	3.82935e+06	C03410	HMDB0000833	123802	1113-83-3	62084	3580	ko00520
MEDN2039	N-heptanoylglycine	N-庚酰甘氨酸	Amino acid and Its metabolites	氨基酸及其代谢物	Amino acid derivatives	氨基酸衍生物	186.1	187.121	[M-H]-	C9H17NO3	22589.9	12337.4	51474.8	214150	58382.8	163723	11779.3	11784	10349.8	5194.45	6156.33	12746	323829	163080	98699.6	66168.5	55707.9	384572	7.20422	7.20422	7.20422	7.20422	7.20422	7.20422	46571.1	46570.8	46408.9	45997.3	46002.5	46976.9	-	HMDB0013010	10932172	23783-23-5	74433	-	-
MEDN0579	N-lactoyl-phenylalanine	N-乳酰基苯丙氨酸	Amino acid and Its metabolites	氨基酸及其代谢物	Amino acid derivatives	氨基酸衍生物	236.1	237.1	[M-H]-	C12H15NO4	5424.13	5122.08	7317.48	7074.32	12622.3	7258.54	7825.29	4869.08	4760.61	5193.74	4262.52	6348.76	2248.94	2686.12	2011.85	1738.78	2969.01	1482.39	1482.53	2351.76	1352.1	2741.19	4054.36	3129.79	9527.86	9660.11	9525.95	9322.78	9713.99	9701.36	-	HMDB0062175	102199091	-	-	-	-
MEDP2336	O-Acetyl-L-homoserine	O-乙酰-L-高丝氨酸	Amino acid and Its metabolites	氨基酸及其代谢物	Amino acid derivatives	氨基酸衍生物	162.1	161.068	[M+H]+	C6H11NO4	143292	272182	176826	199518	34476.2	173557	276641	262261	216556	141403	172160	263116	100544	76964.7	87394.1	108280	163551	178290	237494	100011	244241	154279	167633	185296	172832	175159	168249	174618	174845	170641	-	-	45038083	250736-84-6	-	-	-
MEDN0616	O-Acetyl-L-serine	O-乙酰基-L-丝氨酸	Amino acid and Its metabolites	氨基酸及其代谢物	Amino acid derivatives	氨基酸衍生物	146	147.053	[M-H]-	C5H9NO4	325953	510628	455334	345386	292809	413498	378011	412771	521506	364240	327449	477359	533321	526137	640841	653060	553956	584308	440996	634589	529088	481815	553112	513982	426274	434934	426451	433112	426931	426900	C00979	HMDB0003011	99478	5147-00-2	17981	3270	ko00270,ko00920,ko01100,ko01200,ko01230,ko04122
MEDN1944	O-Phospho-L-threonine	O-磷酸-L-苏氨酸	Amino acid and Its metabolites	氨基酸及其代谢物	Amino acid derivatives	氨基酸衍生物	198	199.025	[M-H]-	C4H10NO6P	41872.3	239255	52947.7	56796.6	90100.7	75418.8	227643	401080	236559	464488	279414	240427	150830	237621	187465	151668	63466.1	236901	469917	1.14636e+06	654319	301197	229308	480676	191302	187841	191304	195869	179472	195647	C12147	HMDB0011185	3246323	1114-81-4	37525	-	ko00860,ko01100
MEDP2587	Phe-Hyp	L-苯丙氨酸-L-羟脯氨酸	Amino acid and Its metabolites	氨基酸及其代谢物	Amino acid derivatives	氨基酸衍生物	279.1	278.127	[M+H]+	C14H18N2O4	65059.7	58388	71992.5	53145.3	56235.7	60227.9	108242	78139.1	89398.5	84574.7	81781.5	110279	61790	69966.9	72605.2	43748.2	55273.1	68018.1	37842.5	52184.5	51237.4	38619.1	53825.5	39548.2	129307	124533	123780	122071	129344	128996	-	HMDB0011176	53480675	90965-82-5	-	-	-
MEDP0637	Phe-Pro	L-苯丙氨酸-L-脯氨酸	Amino acid and Its metabolites	氨基酸及其代谢物	Amino acid derivatives	氨基酸衍生物	263.1	262.132	[M+H]+	C14H18N2O3	139767	56812.4	52821.9	79510	509436	85435.6	3.82269	3.82269	3.82269	3.82269	3.82269	3.82269	137721	49327.4	130327	41401.7	543394	24857.9	44212.4	18079.7	29098	34146.3	15765.6	72892.2	199513	199517	200950	201264	201325	197872	-	HMDB0011177	7020642	7669-65-0	74750	-	-
MEDP2488	Securinine	一叶萩碱	Amino acid and Its metabolites	氨基酸及其代谢物	Amino acid and Its metabolites	氨基酸衍生物	240.1	217.11	[M+H]+	C13H15NO2	629284	590716	561843	621649	507323	548508	488626	528114	543032	538729	647862	704101	741933	832776	726313	846133	687559	664599	977473	911471	739642	1.17351e+06	787017	731751	909567	887687	909399	898510	904347	910577	C10614	-	442872	5610-40-2	-	-	-
MEDN1918	Ser-Ala	丝氨酸-丙氨酸	Amino acid and Its metabolites	氨基酸及其代谢物	Amino acid derivatives	氨基酸衍生物	175.1	176.08	[M-H]-	C6H12N2O4	705971	407335	640858	1.10239e+06	523532	771694	55901.5	127775	99814.1	81169.2	54554.3	54559	337761	511935	422151	258164	295936	577274	97006.1	118055	127344	97488.7	131820	113589	347547	345354	347542	347170	343970	347165	-	-	7009579	6403-17-4	-	-	-
MEDP1356	Shinorine	霉菌素-甘氨酸(维生素A)	Amino acid and Its metabolites	氨基酸及其代谢物	Amino acid derivatives	氨基酸衍生物	333.1	332.122	[M+H]+	C13H20N2O8	53688.1	129490	150019	98889.3	56334.4	71006.2	182102	155612	78164.5	10.8254	144293	111496	221029	104002	148746	146312	179596	170500	133835	146548	196271	133864	120515	197210	142109	135245	141754	144115	142721	121989	-	HMDB0039002	10471931	73112-73-9	-	-	-
MEDN2098	Tiglylglycine	甲基巴豆酰基甘胺酸	Amino acid and Its metabolites	氨基酸及其代谢物	Amino acid derivatives	氨基酸衍生物	156.1	157.17	[M-H]-	C7H11NO3	64094	95058	76392.5	261497	147458	109251	29978.7	25639.3	28357.9	53770.3	27293.7	52347.2	129934	291745	488713	325311	290851	247946	112982	97948.4	117887	256146	202307	100474	99068	100657	99085.5	100183	100175	98595.6	-	HMDB0000959	6441567	35842-45-6	73018	4246	-
MEDP0083	Trans-4-Hydroxy-L-Proline	反-4-羟基-L-脯氨酸	Amino acid and Its metabolites	氨基酸及其代谢物	Amino acid derivatives	氨基酸衍生物	132.1	131.058	[M+H]+	C5H9NO3	1.90552e+06	1.91647e+06	3.67345e+06	1.82109e+06	272077	2.56992e+06	2.4292e+06	2.65267e+06	2.95989e+06	2.58588e+06	4.11136e+06	3.7782e+06	2.06364e+06	2.13963e+06	2.52555e+06	1.68684e+06	1.41822e+06	2.19692e+06	2.40337e+06	2.52081e+06	2.62845e+06	3.05207e+06	2.46089e+06	2.43766e+06	2.3439e+06	2.52887e+06	2.36691e+06	2.51219e+06	2.38939e+06	2.40663e+06	C01157	HMDB0000725	5810	51-35-4	18095	257	ko00330,ko00470,ko01100,ko02010
MEDN1306	Ureidosuccinic acid	N-氨基甲酰基-L-天冬氨酸	Amino acid and Its metabolites	氨基酸及其代谢物	Amino acid derivatives	氨基酸衍生物	175	176.13	[M-H]-	C5H8N2O5	791076	368434	700334	1.1078e+06	608875	888124	46966.4	162455	124367	98981.5	69841.9	69829.8	352333	539532	406729	319570	304699	549500	87050.8	87090	157089	95880.8	152828	110520	365675	365673	363527	363140	378556	363146	C00438	HMDB0000828	93072	13184-27-5	15859	5791	ko00240,ko00250,ko01100,ko01240
MEDP2334	(R)-(-)-1-Amino-2-propanol	(R)-(-)-1-氨基-2-丙醇	Alcohol and amines	醇、胺类	Amines	胺类	76.1	75.0684	[M+H]+	C3H9NO	519417	457021	369509	466049	506298	306545	532677	351921	320458	340279	483162	342983	128662	85910.2	126442	132116	142799	132348	497405	551807	408309	295357	466865	617858	314793	323872	296532	327690	305301	306224	C03194	-	439938	2799-16-8	-	-	ko00260,ko00860,ko01100
MEDP1740	Acrylamide	丙烯酰胺	Alcohol and amines	醇、胺类	Amines	胺类	72	71.0371	[M+H]+	C3H5NO	4337.28	3903.04	3138.94	2145.11	3824.2	4717.24	0.823415	0.823415	0.823415	0.823415	0.823415	0.823415	425.507	0.0658912	1013.72	0.0658912	977.063	445.165	316.432	177.971	716.902	148.134	108.175	501.64	41491.1	43847.3	44257.7	41895.3	46579.1	41908.2	C01659	HMDB0004296	6579	79-06-1	28619	-	-
MEDP1646	Caldine	3,3'-二氨基二丙胺	Alcohol and amines	醇、胺类	Amines	胺类	132.2	131.142	[M+H]+	C6H17N3	59806.1	79082.3	84059	40511.3	67130.9	21815.9	113309	81401.5	36910.8	46980.5	55369.9	99876.2	62020.2	79769.1	59884.8	60088.1	48062	67777.6	87023.8	119768	82305.8	95434.8	102935	47128.3	76288.5	71311.2	73815.1	76414.7	77525.1	60122.8	C03375	-	5942	56-18-8	-	-	ko00330,ko01100
MEDP1494	N-Acetyl-D-Galactosamine	N-乙酰基-D-半乳糖胺	Alcohol and amines	醇、胺类	Amines	胺类	222	221.09	[M+H]+	C8H15NO6	41251.2	29468.7	56575.9	139022	131589	72429.8	446526	372813	288564	213640	305486	369250	36072.9	64107.1	71151.2	5.22328	82419.6	73027.5	1.30129e+06	1.78467e+06	424703	171293	1.91552e+06	1.97644e+06	291841	274055	290166	274806	287978	288074	C01132	HMDB0000212	92164	1811-31-0	40356	5222	ko00052,ko00520,ko01100,ko01250
MEDN0682	Octadecanamide	硬脂酰胺	Alcohol and amines	醇、胺类	Amines	胺类	282.3	283.288	[M-H]-	C18H37NO	85531.2	92822.7	82327.4	66126.9	108608	77852	97491.3	105351	92191.1	92198	154687	77404	72789.3	63921	72823.7	85507.3	79864.5	66033.8	74977.1	66351.2	69785.1	96344.9	81563.7	74846.5	71295.3	71331.2	70377.1	71499.6	70527.9	70546.6	C13846	HMDB0034146	31292	124-26-5	34900	-	-
MEDP0574	Oleamide	油酸酰胺	Alcohol and amines	醇、胺类	Amines	胺类	282.3	281.272	[M+H]+	C18H35NO	3.02258e+06	1.63251e+06	4.26121e+06	8.52349e+06	6.06744e+06	3.45788e+06	1.92905e+06	2.91108e+06	5.09075e+06	744374	2.43843e+06	708448	2.31671e+06	256605	982129	1.03171e+06	911637	803371	2.02479e+06	351148	448512	500544	3.9555e+06	653314	1.31757e+06	1.20187e+06	1.20093e+06	1.27842e+06	1.20549e+06	1.1793e+06	C19670	HMDB0002117	5283387	301-02-0	116314	-	-
MEDP1795	Palmitoylethanolamide（PEA）	棕榈乙醇胺	Alcohol and amines	醇、胺类	Amines	胺类	300.3	299.282	[M+H]+	C18H37NO2	40844.4	36645	31543.4	39284.7	29211.6	38823.5	62058.4	56242	72136.9	50914.9	69662.4	53003.8	40275.9	41081.2	33513.4	41549.2	46444.8	37712.9	27814.6	37955	29374	22264.8	35269.7	34522.5	46212.7	42253.7	44127.7	44484.6	44509.7	43711.1	C16512	HMDB0002100	4671	544-31-0	71464	-	ko04080
MEDP0894	3-Methoxytyramine	3-甲氧基酪胺	Benzene and substituted derivatives	苯及其衍生物	Phenolics	苯酚类	168.1	167.095	[M+H]+	C9H13NO2	81499.5	67164.8	206840	172417	90443.9	148026	211062	257996	304389	87704	136320	78606.6	95181.6	117772	127170	158152	123254	149431	52741.1	10.7591	59876.9	486333	53568.1	396462	73133.6	74356.4	74364.1	71019.7	68849.9	77553	C05587	HMDB0000022	1669	1477-68-5	742324	5094	ko00350,ko01100,ko04728
MEDN1511	4-Methoxyphenol	4-甲氧基苯酚	Benzene and substituted derivatives	苯及其衍生物	Phenolics	苯酚类	123	124.052	[M-H]-	C7H8O2	67369.3	71525.4	114466	90788.9	40671.4	69494.8	41625.3	49445.4	80572.6	53594.4	43337.1	36276.9	24963	112546	125987	101968	94146.1	47118.6	98129.2	79567	65411.7	35447.9	99776.5	89229.4	113460	113175	114507	114059	113580	114060	D04926	HMDB0029696	9015	150-76-5	-	-	-
MEDN0117	4-Methylcatechol	4-甲基儿茶酚	Benzene and substituted derivatives	苯及其衍生物	Phenolics	苯酚类	123	124.052	[M-H]-	C7H8O2	67369.3	71525.4	114466	90788.9	40671.4	69494.8	41625.3	49445.4	80572.6	53594.4	43337.1	36276.9	24963	112546	125987	101968	94146.1	47118.6	98129.2	79567	65411.7	35447.9	99776.5	89229.4	113460	113175	114507	114059	113580	114060	C06730	HMDB0000873	9958	452-86-8	17254	5834	ko01100
MEDN1193	Acetaminophen	对乙酰氨基酚	Benzene and substituted derivatives	苯及其衍生物	Phenolics	苯酚类	150.1	151.063	[M-H]-	C8H9NO2	1.65018e+06	1.47694e+06	1.57892e+06	1.5342e+06	578657	848324	49439.4	85047.2	77606.2	145224	33168.1	79502.4	971856	985256	712730	787777	593126	809139	1.31847e+06	1.29914e+06	1.28225e+06	419126	1.16435e+06	553718	791291	783423	783722	780890	790907	790824	C06804	HMDB0001859	1983	103-90-2	46195	6353	ko04976
MEDP0892	Catechol	邻苯二酚	Benzene and substituted derivatives	苯及其衍生物	Phenolics	苯酚类	111.1	110.037	[M+H]+	C6H6O2	4.32875e+06	4.1383e+06	4.16558e+06	3.89726e+06	4.25736e+06	4.31445e+06	5.13404e+06	5.00327e+06	4.97693e+06	5.04559e+06	5.09453e+06	5.01834e+06	6.17487e+06	5.40776e+06	5.59812e+06	5.67325e+06	5.13936e+06	6.18416e+06	5.589e+06	6.15729e+06	6.34883e+06	6.33904e+06	5.90574e+06	5.23583e+06	3.69703e+06	3.73359e+06	3.73362e+06	3.74837e+06	3.70809e+06	3.71687e+06	C00090	HMDB0000957	289	120-80-9	18135	282	ko01100
MEDN0647	Hydroquinone	对苯二酚	Benzene and substituted derivatives	苯及其衍生物	Phenolics	苯酚类	109	110.037	[M-H]-	C6H6O2	2.36935e+06	1.78993e+06	4.42234e+06	2.42965e+06	1.35411e+06	1.48247e+06	1.47732e+06	1.23979e+06	2.12863e+06	1.54447e+06	1.47484e+06	1.15917e+06	734978	3.85276e+06	4.12554e+06	3.17287e+06	2.03644e+06	1.67753e+06	4.86697e+06	4.57525e+06	3.1696e+06	1.62241e+06	4.06101e+06	3.13497e+06	2.65052e+06	2.65909e+06	2.65057e+06	2.64569e+06	2.66299e+06	2.66292e+06	C00530	HMDB0002434	785	123-31-9	17594	6681	ko00350,ko01100,ko05208
MEDN1549	Hydroumbellic acid	氢化伞形酸	Benzene and substituted derivatives	苯及其衍生物	Phenolics	苯酚类	181.1	182.058	[M-H]-	C9H10O4	83626.6	81185.3	73257.1	56917.6	97471.2	78808.3	74032.9	86078.6	74489.2	90314.3	68110.1	62449.4	84842.3	72583.6	92468.6	71041.9	70709.7	78682.3	75200.2	91471.3	76776.2	69575.1	105110	90313.8	64432.7	64475	66805.8	65600.5	66105.1	65601.1	-	HMDB0126386	96384	5631-68-5	-	-	-
MEDN1191	1,2-epoxy-3-(p-nitrophenoxy) propane	1,2-环氧-3-(对硝基苯氧基)丙烷	Benzene and substituted derivatives	苯及其衍生物	Benzene and substituted derivatives	苯及其衍生物	194	195.053	[M-H]-	C9H9NO4	6.49921e+06	5.60244e+06	6.06122e+06	6.20793e+06	2.35808e+06	3.34614e+06	212976	370646	339629	559422	128643	251215	3.59779e+06	3.75582e+06	2.77559e+06	3.01599e+06	2.2186e+06	2.84638e+06	4.85419e+06	4.84174e+06	4.72263e+06	1.4899e+06	4.36197e+06	2.07723e+06	3.08615e+06	3.06914e+06	3.11123e+06	3.03198e+06	3.09141e+06	3.13173e+06	C04274	-	21327	5255-75-4	-	-	-
MEDP1003	1-Hydroxylamino-2-phenylethane	羟苯乙胺	Benzene and substituted derivatives	苯及其衍生物	Benzene and substituted derivatives	苯及其衍生物	120.1	137	[M-H2O+H]+	C8H11NO	61061.4	50241.6	56608.6	64745.7	43333.3	60179.5	78646.8	89826	59443.9	50739.8	53435.9	60247.3	47481.5	37092.2	25479	32733.4	37841.7	31470.4	21737.4	37219.9	38969.9	36715.8	30354.8	31907.5	94017.2	93032.1	95421.2	91694.7	96192.6	96255.4	-	-	165091	3217-93-4	-	-	-
MEDP0798	1-Naphthylamine	1-萘胺	Benzene and substituted derivatives	苯及其衍生物	Benzene and substituted derivatives	苯及其衍生物	144.1	143.073	[M+H]+	C10H9N	139676	107609	114129	141438	82716.5	119821	118154	115848	149254	136948	123753	129615	204142	120426	248252	160598	150370	143167	137026	132580	179267	128481	147173	128903	108032	108265	111995	112546	112483	101912	C14790	-	8640	134-32-7	-	-	ko00980
MEDN1231	1-O-vanillyl-β-D-glucose	1-O-香草基-β-D-葡萄糖	Benzene and substituted derivatives	苯及其衍生物	Benzene and substituted derivatives	苯及其衍生物	329.1	330.095	[M-H]-	C14H18O9	52406	51299.8	44159.7	53494	67068.7	66902.1	53305.8	45034.3	45054.5	57089.2	44592.4	52690.4	47409.5	63980	59911.1	50581.9	50213.1	55015.5	50952.8	55014.4	49184.1	54448.9	58893.4	64193.5	40395.6	41659.1	40412.3	41347.7	41304.7	40036.7	C20470	-	14132344	-	-	-	-
MEDN1837	2,6-Di-tert-butyl-4-(hydroxymethyl)phenol	2,6-二叔丁基-4-(羟甲基)苯酚	Benzene and substituted derivatives	苯及其衍生物	Benzene and substituted derivatives	苯及其衍生物	235.2	236.178	[M-H]-	C15H24O2	6.62367e+06	6.45278e+06	7.34542e+06	7.32436e+06	7.16964e+06	6.47201e+06	7.2669e+06	7.21402e+06	6.49432e+06	6.44871e+06	6.3115e+06	6.9805e+06	5.83356e+06	6.20319e+06	6.15802e+06	6.0198e+06	6.10787e+06	6.24565e+06	6.48265e+06	6.3042e+06	5.92987e+06	6.18981e+06	5.83113e+06	5.83598e+06	6.53107e+06	6.60316e+06	6.53089e+06	6.5369e+06	6.56813e+06	6.56821e+06	-	HMDB0032048	6929	88-26-6	-	-	-
MEDN0554	2-(4-Hydroxyphenyl)ethanol	对羟基苯乙醇	Benzene and substituted derivatives	苯及其衍生物	Benzene and substituted derivatives	苯及其衍生物	137.1	138.068	[M-H]-	C8H10O2	577090	472700	439934	578045	644629	400673	386266	422817	441944	425696	445630	446251	458452	513626	442250	445342	511388	482805	490206	462607	512689	476192	493612	518090	472384	486816	472889	462021	480864	480822	C06044	HMDB0004284	7044	501-94-0	1879	7044	ko00350,ko01100
MEDN2155	2-Amino-5-nitrobenzoic acid	2-氨基-5-硝基苯甲酸	Benzene and substituted derivatives	苯及其衍生物	Benzene and substituted derivatives	苯及其衍生物	181	182.033	[M-H]-	C7H6N2O4	100867	100301	95304.1	88751.5	88538.2	79350.9	95678.2	66817.5	94667	82162.4	97147.3	99503.8	187499	229624	188398	211433	159546	184106	183648	189790	190179	183170	195544	189223	86452.6	86912.7	85678.6	84631.3	87337.6	87390.4	C19788	-	12032	616-79-5	-	-	-
MEDP2633	2-Butyl-3-(4-hydroxybenzoyl)benzofuran	2-丁基-3-(4-羟基苯甲酰基)苯并呋喃	Benzene and substituted derivatives	苯及其衍生物	Benzene and substituted derivatives	苯及其衍生物	295.1	294.126	[M+H]+	C19H18O3	131624	175358	185594	175084	164046	130127	171955	168733	156685	163524	156709	144880	139136	147920	148338	136419	187752	63145.6	122116	133083	136033	139176	135413	128584	174510	174742	184728	176854	174664	179035	D87732	-	96670	52490-15-0	-	-	-
MEDP2104	3-Aminoquinoline	3-氨基喹啉	Benzene and substituted derivatives	苯及其衍生物	Benzene and substituted derivatives	苯及其衍生物	145.1	144.069	[M+H]+	C9H8N2	93966.9	206481	269248	136595	68641.8	162676	161882	157882	167148	174569	121717	246218	224537	294403	233011	273819	184363	346762	188703	191605	235348	202715	193919	189014	288663	286994	286990	283613	283852	297686	C09183	HMDB0036827	11375	580-17-6	9053	-	-
MEDP0669	3-Chloroaniline	3-氯苯胺	Benzene and substituted derivatives	苯及其衍生物	Benzene and substituted derivatives	苯及其衍生物	128.1	127.019	[M+H]+	C6H6ClN	5.75476e+07	6.02782e+07	6.34797e+07	6.07902e+07	5.87642e+07	5.92235e+07	6.69888e+07	6.70534e+07	6.62216e+07	6.52367e+07	6.58358e+07	6.60172e+07	9.0295e+07	9.06866e+07	9.17985e+07	9.1844e+07	7.51809e+07	8.74704e+07	7.50674e+07	8.56129e+07	8.88573e+07	8.59261e+07	8.6969e+07	7.14967e+07	6.07988e+07	6.08011e+07	6.00603e+07	6.08271e+07	6.0534e+07	6.0828e+07	-	-	7932	108-42-9	-	-	-
MEDP1898	3-Hydroxyphenylurea	3-羟基苯基脲	Benzene and substituted derivatives	苯及其衍生物	Benzene and substituted derivatives	苯及其衍生物	153.1	152.059	[M+H]+	C7H8N2O2	6.25114e+07	6.60627e+07	6.0262e+07	6.26383e+07	6.12065e+07	5.80762e+07	1.17546e+08	1.13315e+08	1.09584e+08	1.18023e+08	1.07202e+08	1.1071e+08	8.15355e+07	1.0774e+08	9.4804e+07	9.78221e+07	8.49422e+07	9.28714e+07	111402076	1.36547e+08	1.1166e+08	1.2412e+08	1.2253e+08	8.63674e+07	7.87645e+07	7.85129e+07	7.81713e+07	7.79765e+07	7.79427e+07	7.93968e+07	-	-	12796	701-82-6	-	-	-
MEDP2408	3-aminobenzamide	3-氨基苯甲酰胺	Benzene and substituted derivatives	苯及其衍生物	Benzene and substituted derivatives	苯及其衍生物	137.1	136.064	[M+H]+	C7H8N2O	778101	7.64665e+06	1.23074e+07	1.27908e+07	4.30542e+06	7.772e+06	264949	392415	479004	317839	620040	232849	7.34542e+06	9.0693e+06	1.70248e+06	1.08417e+07	1.01513e+07	4.26608e+06	58652.8	96589.4	105007	78500.8	118689	75914.4	5.71213e+06	5.7747e+06	5.83613e+06	5.76394e+06	5.76382e+06	5.88407e+06	-	-	1645	3544-24-9	-	-	-
MEDP2139	4-Chloroaniline	4-氯苯胺	Benzene and substituted derivatives	苯及其衍生物	Benzene and substituted derivatives	苯及其衍生物	128	127.019	[M+H]+	C6H6ClN	146844	205495	207301	244824	142390	119417	164570	200089	188606	123844	174449	188812	237856	257950	247714	261689	236829	236715	228860	227903	251913	251209	275032	234418	144763	144768	141304	139177	139503	171467	C14450	-	7812	106-47-8	-	-	-
MEDN0410	4-Hydroxybenzaldehyde	4-羟基苯甲醛	Benzene and substituted derivatives	苯及其衍生物	Benzene and substituted derivatives	苯及其衍生物	121	122.037	[M-H]-	C7H6O2	218660	222694	201939	220732	198343	166537	177233	183250	187707	175596	166711	173478	108845	98718.3	124849	90363.2	150517	121382	168415	101469	125315	129500	110101	111466	198532	200927	200924	194210	204417	194608	C00633	HMDB0011718	126	123-08-0	17597	-	ko01100
MEDP2664	4-Hydroxyquinoline	4-羟基喹啉	Benzene and substituted derivatives	苯及其衍生物	Benzene and substituted derivatives	苯及其衍生物	146.1	145.053	[M+H]+	C9H7NO	41108.6	25435.3	7511.09	13725.3	4902.87	33520.8	12641.9	8840.45	7761.77	33439.9	10674.6	26089.3	51534.1	106000	98179.9	111935	34005.7	65342.6	62396	40113.7	40519.2	77351.6	70641.5	66709.4	89459.1	97560.2	97505	96968.7	95355	95262.4	C06343	-	69141	611-36-9	-	-	-
MEDN1483	Acetaminophen sulfate	对乙酰氨基酚硫酸盐	Benzene and substituted derivatives	苯及其衍生物	Benzene and substituted derivatives	苯及其衍生物	230	231.02	[M-H]-	C8H9NO5S	4.01692e+06	4.12854e+06	4.29961e+06	3.77101e+06	2.13694e+06	2.84437e+06	960403	664394	1.30186e+06	345305	978310	532391	565477	6.28847e+06	3.57954e+06	5.01587e+06	3.23974e+06	3.35575e+06	2.96984e+06	2.29803e+06	3.49541e+06	1.65152e+06	3.79631e+06	2.70807e+06	2.13594e+06	2.13993e+06	2.15589e+06	2.13628e+06	2.15241e+06	2.15225e+06	-	-	83939	10066-90-7	-	-	-
MEDN1606	Acetanilide	乙酰苯胺	Benzene and substituted derivatives	苯及其衍生物	Benzene and substituted derivatives	苯及其衍生物	134.1	135.068	[M-H]-	C8H9NO	297124	309198	303995	308864	262172	319423	361277	321872	321236	245096	307414	329512	360213	380319	368631	389041	360456	363044	384340	403033	378691	401074	370829	382138	300263	301557	303130	301236	301240	302258	C07565	HMDB0001250	904	103-84-4	28884	6107	-
MEDN2050	Daidzein	黄豆苷元	Benzene and substituted derivatives	苯及其衍生物	Benzene and substituted derivatives	苯及其衍生物	313.1	254.058	[M-H]-	C15H10O4	273681	419866	55539	171327	515517	37569.2	157311	358378	367593	176363	270572	224538	595350	886774	685143	815870	534226	695180	696872	867671	721536	691223	568511	513300	962434	1.00762e+06	1.00759e+06	990946	1.00419e+06	1.00419e+06	C10208	HMDB0003312	5281708	486-66-8	28197	-	ko01100
MEDN1802	Zereno	折仑诺	Benzene and substituted derivatives	苯及其衍生物	Benzene and substituted derivatives	苯及其衍生物	321.2	322.178	[M-H]-	C18H26O5	37396	36551	25694.3	33779.1	37122.5	29640.9	79978.2	71161.8	63013.3	68789.6	71244.6	77733.3	36559.9	42831.7	39460	49946.4	38643.7	43198.9	74162.9	79051.2	61123.6	80177.5	72628.2	52171.4	53363.9	53364.7	53866.7	53113.6	53528.8	54061.4	C14752	HMDB0032702	2999413	26538-44-3	-	-	-
MEDP2389	5-Hydroxypyridine-2(1H)-one	5-羟基吡啶-2(1H)-酮	Heterocyclic compounds	杂环化合物	Pyridine and pyridine derivatives	吡啶及其衍生物	112	111.032	[M+H]+	C5H5NO2	78730.1	129024	49539.4	146799	63971.2	87308.2	117450	179924	287112	323332	243361	109923	190483	89188.5	69298.5	138076	122451	62570.6	270864	405659	333408	329710	346596	324306	152796	153563	152796	151095	157213	151281	C01059	-	21542654	59273-17-5	-	-	ko00760,ko01100
MEDP1907	(E,Z)-2-Amino-3,14-octadecadien-1-ol	（E，Z）-2-氨基-3,14-十八二烯-1-醇	Alcohol and amines	醇、胺类	Alcohols	醇类	282.3	281.272	[M+H]+	C18H35NO	3.02258e+06	1.63251e+06	4.26121e+06	8.52349e+06	6.06744e+06	3.45788e+06	1.92905e+06	2.91108e+06	5.09075e+06	744374	2.43843e+06	708448	2.31671e+06	256605	982129	1.03171e+06	911637	803371	2.02479e+06	351148	448512	500544	3.9555e+06	653314	1.31757e+06	1.20187e+06	1.20093e+06	1.27842e+06	1.20549e+06	1.1793e+06	-	-	6439505	158507-68-7	-	-	-
MEDP2525	2-Amino-2-methyl-1,3-propanediol	2-氨基-2-甲基-1,3-丙二醇	Alcohol and amines	醇、胺类	Alcohols	醇类	106.1	105.078	[M+H]+	C4H11NO2	457708	470544	389744	535871	586472	465244	495232	542180	453000	481405	497832	450344	532520	559541	470164	564420	516278	563752	589498	624094	636625	633745	624166	486310	463215	465811	460648	464850	456934	464818	-	-	1531	115-69-5	-	-	-
MEDN1224	Bis(1-inositol)-3,1'-phosphate 1-phosphate	双(1L-肌醇)-3,1'-磷酸1-磷酸	Alcohol and amines	醇、胺类	Alcohols	醇类	501	502.049	[M-H]-	C12H24O17P2	8.1813e+06	8.21152e+06	1.08384e+07	1.01133e+07	6.4862e+06	1.12998e+07	2.75227e+07	1.78336e+07	1.58186e+07	1.22738e+07	2.30331e+07	2.46671e+07	1.14235e+07	1.6092e+07	1.23786e+07	1.34318e+07	1.46165e+07	1.92584e+07	2.95945e+07	3.85093e+07	3.1113e+07	4.015e+07	3.64963e+07	2.76739e+07	1.30211e+07	1.28239e+07	1.3022e+07	1.28009e+07	1.30433e+07	1.27969e+07	C19799	-	53262311	-	-	-	ko00562,ko01100
MEDN1302	D-Inositol 1,4-diphosphate	D-肌醇-1,4-二磷酸	Alcohol and amines	醇、胺类	Alcohols	醇类	339	339.996	[M-H]-	C6H14O12P2	964413	646633	1.44584e+06	1.12817e+06	780773	1.1121e+06	3.48075	3.48075	3.48075	3.48075	3.48075	3.48075	919321	1.06449e+06	953724	888900	740237	934120	37384	11.683	11.683	401575	29899	46786.7	487392	487125	503253	494405	487214	487255	C01220	-	439444	74465-19-3	-	-	ko00562,ko01100,ko04070
MEDP2458	Heptethylene-glycol	庚乙二烯乙二醇	Alcohol and amines	醇、胺类	Alcohols	醇类	327.2	326.194	[M+H]+	C14H30O8	4.13343e+06	3.19513e+06	3.8443e+06	3.00038e+06	3.72768e+06	3.76484e+06	3.44427e+06	4.11454e+06	4.1918e+06	3.99637e+06	3.7983e+06	3.43279e+06	3.71412e+06	3.33391e+06	3.32137e+06	3.10011e+06	2.77041e+06	3.39178e+06	2.64487e+06	3.86472e+06	3.32614e+06	3.32142e+06	3.51717e+06	2.81098e+06	1.51261e+06	1.5209e+06	1.51958e+06	1.52673e+06	1.50569e+06	1.5275e+06	-	HMDB0061835	79718	5617-32-3	44748	-	-
MEDP2068	Hexaethylene-glycol	六甘醇	Alcohol and amines	醇、胺类	Alcohols	醇类	283.2	282.168	[M+H]+	C12H26O7	1.15558e+07	9.52938e+06	1.0304e+07	9.98119e+06	1.04471e+07	9.60704e+06	1.04296e+07	9.92976e+06	1.24565e+07	1.08238e+07	1.0989e+07	9.24221e+06	1.3539e+07	9.53447e+06	1.03392e+07	9.30357e+06	9.71732e+06	9.93946e+06	1.02059e+07	1.05971e+07	9.28454e+06	1.09273e+07	9.68923e+06	8.11678e+06	4.87805e+06	4.87921e+06	4.7951e+06	4.88306e+06	4.83027e+06	4.83275e+06	-	HMDB0061822	17472	2615-15-8	49793	-	-
MEDP1298	Pregnanetriol	孕烯醇	Alcohol and amines	醇、胺类	Alcohols	醇类	337.3	336.266	[M+H]+	C21H36O3	9.22892	9.22892	9.22892	9.22892	9.22892	9.22892	438731	782277	261264	378842	701111	380520	112642	66137.9	187579	118690	411594	359459	439889	74272.1	164908	76496.2	514358	894671	255187	273469	271327	271537	269510	258861	C14680	-	101967	1098-45-9	-	-	-
MEDP2436	Tetraethylene-glycol	三缩四乙二醇	Alcohol and amines	醇、胺类	Alcohols	醇类	195.1	194.115	[M+H]+	C8H18O5	752162	522822	1.49091e+06	862763	1.074e+06	860611	603360	972592	908117	1.1049e+06	1.8959e+06	955608	1.23769e+06	1.25177e+06	1.50014e+06	1.14003e+06	1.04256e+06	1.22373e+06	1.13297e+06	1.23821e+06	1.27673e+06	1.14157e+06	854481	682767	400939	398354	398971	404961	405899	392725	-	HMDB0094708	8200	112-60-7	44920	-	-
MEDP0125	Choline	胆碱	Tryptamines,Cholines,Pigments	色胺、胆碱、色素	Cholines	胆碱类	105.1	104.108	[M+H]+	C5H14NO+	287834	265867	143335	170250	120332	164023	108621	171303	89033	94677.4	105664	96487.7	74811.9	100616	132652	103223	169335	114567	339623	340152	238662	210557	520244	571515	194769	180832	194436	200978	181284	182279	C00114	HMDB0000097	305	62-49-7	15354	56	ko00260,ko00552,ko00564,ko01100,ko02010,ko04725,ko04976,ko05231
MEDN0115	Chenodeoxycholic Acid	鹅去氧胆酸	Bile acids	胆汁酸	Bile acids	胆汁酸	391.3	392.293	[M-H]-	C24H40O4	895.581	466.183	162.476	314.443	0.966955	72.1404	215.447	117.12	197.693	134.922	90.6459	0.966955	1881.04	187.983	96.3317	157.867	26.8421	79.7303	0.195398	0.195398	0.195398	0.195398	0.195398	0.195398	1928.84	1917.67	1916.11	1902.17	1902.44	1940.15	C02528	HMDB0000518	10133	474-25-9	16755	207	ko00120,ko01100,ko04976
MEDN1723	Cholic acid	胆酸	Bile acids	胆汁酸	Bile acids	胆汁酸	407.3	408.288	[M-H]-	C24H40O5	0.248247	0.248247	0.248247	0.248247	0.248247	0.248247	1909.5	719.653	0.248247	288.353	0.248247	325.456	665791	1.48401e+06	486803	1.07467e+06	111607	207496	285615	123782	111907	67352.2	167061	204328	1.59783e+06	1.59764e+06	1.61383e+06	1.60152e+06	1.60444e+06	1.60541e+06	C00695	-	221493	81-25-4	-	-	ko00120,ko01100,ko04976
MEDN1899	Deoxycholic acid	脱氧胆酸	Bile acids	胆汁酸	Bile acids	胆汁酸	391.3	392.293	[M-H]-	C24H40O4	48859	16899.9	5765.52	16859.3	4466.18	5852.36	7015.4	7353.54	13058.4	7178.8	5442.14	5461.77	0.00169939	39.9727	30.3936	27.1018	16.4003	12.4757	16.5962	14.9697	0.00169939	14.7615	16.5693	12.1676	88396.2	88887	88392.3	88569.4	89044.7	88568.9	C04483	HMDB0000626	222528	302-95-4	28834	265	ko04976
MEDN1126	Gamma-Mercholic Acid	γ-鼠胆酸	Bile acids	胆汁酸	Bile acids	胆汁酸	407.3	408.288	[M-H]-	C24H40O5	0.248247	0.248247	0.248247	0.248247	0.248247	0.248247	1909.5	719.653	0.248247	288.353	0.248247	325.456	665791	1.48401e+06	486803	1.07467e+06	111607	207496	285615	123782	111907	67352.2	167061	204328	1.59783e+06	1.59764e+06	1.61383e+06	1.60152e+06	1.60444e+06	1.60541e+06	C17649	-	92805	547-75-1	-	-	-
MEDN1904	Glycodeoxycholic acid	甘氨脱氧胆酸	Bile acids	胆汁酸	Bile acids	胆汁酸	448.3	449.314	[M-H]-	C26H43NO5	98419.5	16548.5	22887.6	59433.6	14640.5	13139.9	12612.1	19730.4	62084.7	26357.8	45992.2	15932.3	60756.6	79633.1	49573.1	30040.5	1517.74	24806	8619.89	4915.06	12924.2	2183.93	6011.65	14878.4	32644.7	35543.8	32678.9	32485	34527.1	35219.5	C05464	HMDB0000631	3035026	360-65-6	27471	5604	-
MEDN0113	Glycochenodeoxycholic Acid	甘氨鹅脱氧胆酸	Bile acids	胆汁酸	Bile acids	胆汁酸	448.3	449.314	[M-H]-	C26H43NO5	12280.2	2626.6	8108.36	6096.02	2978.59	2984.14	2511.22	2995.86	9776.95	5472.94	6559.56	3412.59	472.271	544.261	596.932	347.361	289.542	413.021	477.925	490.484	810.453	437.78	384.175	877.809	137961	137962	139237	137953	138769	138768	C05466	HMDB0000637	22833540	640-79-9	-	5610	ko00120,ko04976,ko04979
MEDN0107	Glycolithocholic acid	甘氨石胆酸	Bile acids	胆汁酸	Bile acids	胆汁酸	432.3	433.319	[M-H]-	C26H43NO4	21714.5	24392.8	23823.7	21183.7	23039.7	23467.8	27438.1	22535.4	27578.3	24828.7	21932.6	22946.1	9644.65	11218.5	10741.3	10751.5	8240.43	10143.4	9815.38	10108	9439.79	10803	9546.41	11287.1	31163.2	30971.6	31037.1	30429.2	31270.7	31276.2	C15557	HMDB0000698	115245	474-74-8	37998	5666	-
MEDN0109	Hyodeoxycholic acid	猪去氧胆酸	Bile acids	胆汁酸	Bile acids	胆汁酸	391.3	392.293	[M-H]-	C24H40O4	40.2577	13.256	8.68475	3.83952	6.096	9.32999	37.3635	22.1437	15.3026	4.85078	7.4121	7.24175	18.0239	14.663	6.70644	5.01129	3.61678	4.79338	0.000955059	0.000955059	0.000955059	0.000955059	0.000955059	0.000955059	42262.7	42355.3	42446	42298.4	42297.9	42563.6	-	HMDB0000733	9963687	83-49-8	-	5701	-
MEDN1077	alpha-Muricholic acid	α-鼠胆酸	Bile acids	胆汁酸	Bile acids	胆汁酸	407.3	408.288	[M-H]-	C24H40O5	0.248247	0.248247	0.248247	0.248247	0.248247	0.248247	1909.5	719.653	0.248247	288.353	0.248247	325.456	665791	1.48401e+06	486803	1.07467e+06	111607	207496	285615	123782	111907	67352.2	167061	204328	1.59783e+06	1.59764e+06	1.61383e+06	1.60152e+06	1.60444e+06	1.60541e+06	C17647	-	5283852	2393-58-0	-	-	-
MEDN1902	beta-Muricholic acid	β-鼠胆酸	Bile acids	胆汁酸	Bile acids	胆汁酸	407.3	408.288	[M-H]-	C24H40O5	0.248247	0.248247	0.248247	0.248247	0.248247	0.248247	1909.5	719.653	0.248247	288.353	0.248247	325.456	665791	1.48401e+06	486803	1.07467e+06	111607	207496	285615	123782	111907	67352.2	167061	204328	1.59783e+06	1.59764e+06	1.61383e+06	1.60152e+06	1.60444e+06	1.60541e+06	C17726	-	5283853	2393-59-1	-	-	-
MEDP0115	1,4-Dihydro-1-Methyl-4-Oxo-3-Pyridinecarboxamide	1,4-二氢-1-甲基-4-氧代-3-吡啶甲酰胺	Heterocyclic compounds	杂环化合物	Pteridines and derivatives	蝶啶及其衍生物	153.1	152.059	[M+H]+	C7H8N2O2	19087.7	85729	123675	91855.6	18206.8	76335.9	10273.7	13407.8	14837	4139.64	10828.4	4708.19	1.94191	1.93917	1.94011	1.93917	1.93917	1.96151	3961.8	11244.1	7865.01	33756.4	7723.12	12996.3	54415.3	54686	61523.9	55301.9	56119.9	55943.6	C05843	HMDB0004194	440810	769-49-3	27838	-	ko00760,ko01100
MEDP0443	10-Formyl-Thf	甲酰四氢叶酸	Heterocyclic compounds	杂环化合物	Pteridines and derivatives	蝶啶及其衍生物	474.2	473.166	[M+H]+	C20H23N7O7	11531.9	12737.7	9559.38	18982.2	5257	7850.82	12586	18506.7	42204.1	22959.1	33670.9	23529.8	0.67404	0.67404	0.67404	0.67404	0.67404	0.67404	20114.6	63082.1	13795	187683	24016.3	16366.3	37203.2	37202.6	37476.7	38046.6	36288.5	37309.3	C00234	HMDB0000972	135450591	2800-34-2	15637	5912	ko00670,ko00970,ko01100,ko01200,ko01240,ko01523
MEDP1999	2,4-Dihydroxypyridine	2,4-二羟基吡啶	Heterocyclic compounds	杂环化合物	Pteridines and derivatives	蝶啶及其衍生物	112	111.032	[M+H]+	C5H5NO2	78730.1	129024	49539.4	146799	63971.2	87308.2	117450	179924	287112	323332	243361	109923	190483	89188.5	69298.5	138076	122451	62570.6	270864	405659	333408	329710	346596	324306	152796	153563	152796	151095	157213	151281	-	-	54696004	626-03-9	-	-	-
MEDN0098	2-Picolinic Acid	2-吡啶甲酸	Heterocyclic compounds	杂环化合物	Pteridines and derivatives	蝶啶及其衍生物	122	123.032	[M-H]-	C6H5NO2	3.18669e+06	3.27969e+06	3.47923e+06	3.22057e+06	3.51238e+06	3.08707e+06	4.23609e+06	3.89848e+06	3.65272e+06	3.83345e+06	3.86327e+06	3.86516e+06	3.43664e+06	3.45706e+06	3.36096e+06	3.5179e+06	3.07785e+06	3.03839e+06	3.35188e+06	3.61448e+06	3.21466e+06	3.50652e+06	3.16615e+06	3.55332e+06	3.63864e+06	3.63929e+06	3.71129e+06	3.65639e+06	3.64052e+06	3.65637e+06	C10164	HMDB0002243	1018	98-98-6	28747	-	ko00380,ko01100
MEDP0118	4-Pyridoxic Acid	4-吡哆酸	Heterocyclic compounds	杂环化合物	Pteridines and derivatives	蝶啶及其衍生物	184.1	183.053	[M+H]+	C8H9NO4	3.50379e+06	4.92455e+06	3.0751e+06	4.21697e+06	2.26546e+06	3.2743e+06	5.6936e+06	5.46982e+06	3.90399e+06	1.26873e+06	2.58609e+06	2.60789e+06	3.47795e+06	8.48189e+06	7.01032e+06	7.83248e+06	5.56803e+06	3.48321e+06	4.7594e+06	4.44652e+06	7.85759e+06	1.8311e+06	9.27458e+06	9.99931e+06	4.03456e+06	4.00732e+06	4.03457e+06	4.00597e+06	4.03615e+06	4.03557e+06	C00847	HMDB0000017	6723	82-82-6	17405	239	ko00750,ko01100
MEDP0821	6-Methylnicotinamide	6-甲基烟酰胺	Heterocyclic compounds	杂环化合物	Pteridines and derivatives	蝶啶及其衍生物	137.1	136.064	[M+H]+	C7H8N2O	639425	4.37777e+06	6.97797e+06	7.16867e+06	2.3199e+06	4.95758e+06	162263	238554	338628	176543	366299	147994	4.28151e+06	5.63767e+06	1.35906e+06	7.5623e+06	6.70458e+06	2.41611e+06	70436.7	48591.9	150619	85969.2	127060	111122	3.21164e+06	3.21699e+06	3.27924e+06	3.23534e+06	3.23572e+06	3.28623e+06	-	HMDB0013704	96351	6960-22-1	88954	-	-
MEDN1484	Ethionamide	乙硫酰胺	Heterocyclic compounds	杂环化合物	Pteridines and derivatives	蝶啶及其衍生物	165	166.056	[M-H]-	C8H10N2S	3.04067e+06	3.5911e+06	1.70904e+06	1.80553e+06	4.42921e+06	1.13813e+06	1.96968e+06	3.62223e+06	3.62004e+06	2.28611e+06	3.59975e+06	3.1219e+06	2.18422e+06	2.13803e+06	1.94741e+06	2.61752e+06	1.81518e+06	2.11262e+06	2.70261e+06	2.50526e+06	2.265e+06	2.63556e+06	3.0884e+06	3.17845e+06	5.66909e+06	5.61002e+06	5.60896e+06	5.59833e+06	5.60097e+06	5.68454e+06	C07665	HMDB0014747	2761171	536-33-4	4885	-	-
MEDP0384	Isoxanthopterin	異黃喋呤	Heterocyclic compounds	杂环化合物	Pteridines and derivatives	蝶啶及其衍生物	180	179.044	[M+H]+	C6H5N5O2	285820	434782	629268	458770	281282	239575	53573.2	74606	141227	115576	76103.7	72017.3	245788	326794	372293	407444	291879	306920	232027	382306	368127	230832	337553	299326	253121	255839	253194	250305	264995	250293	C03975	HMDB0000704	10729	529-69-1	16713	5672	-
MEDP0584	Pterine	2-氨基-4-羟基蝶啶	Heterocyclic compounds	杂环化合物	Pteridines and derivatives	蝶啶及其衍生物	164	163.049	[M+H]+	C6H5N5O	112500	157330	196735	74842.6	66108.7	92291.8	85853	59413.2	9.29214	69140.6	53400.6	83924.9	28961.9	84283.7	77160.7	92648.3	46132.6	51200.5	61727.1	114735	140289	48047.6	8.63206	93352.8	71238.7	70324.1	58132.2	72166.6	64927.1	65034.3	C00715	HMDB0000802	73000	2236-60-4	18265	5766	-
MEDP0898	Pyridoxal	吡哆醛	Heterocyclic compounds	杂环化合物	Pteridines and derivatives	蝶啶及其衍生物	168.3	167.058	[M+H]+	C8H9NO3	4.10336e+06	3.06525e+06	1.88352e+06	2.14674e+06	1.10401e+06	2.99086e+06	1.16612e+06	980504	888812	1.31143e+06	940212	1.33209e+06	645482	953113	737271	856043	704317	771007	4.03651e+06	4.92954e+06	5.07745e+06	1.58569e+06	6.86049e+06	3.89337e+06	1.01959e+06	1.08839e+06	1.09027e+06	1.04194e+06	1.04389e+06	1.07835e+06	C00250	HMDB0001545	1050	66-72-8	17310	6312	ko00750,ko01100,ko01240,ko04977
MEDN0195	Pyridoxal 5'-Phosphate	磷酸吡哆醛	Heterocyclic compounds	杂环化合物	Pteridines and derivatives	蝶啶及其衍生物	246	247.025	[M-H]-	C8H10NO6P	88687.4	261827	273988	167767	112348	205192	118358	161182	174575	239518	252283	97169.2	234956	467631	398028	514906	115028	359982	20013.9	36126.2	400934	943230	26761.6	5120.67	141708	141384	146210	143535	143928	143535	C00018	HMDB0001491	1051	54-47-7	18405	6275	ko00730,ko00750,ko01100,ko01240,ko04977
MEDP1212	1,3-Dicyclohexylurea	1,3-二环己基脲	Alcohol and amines	醇、胺类	Polyamines	多胺	225.2	224.189	[M+H]+	C13H24N2O	685948	684206	691091	508533	540706	646346	586665	648775	598921	542535	540917	651086	715669	696285	709398	709145	706949	624664	607193	665995	677211	665528	669908	695766	677276	677273	670527	677220	675558	673008	-	-	4277	2387-23-7	-	-	-
MEDP1741	Agmatine	胍基丁胺	Alcohol and amines	醇、胺类	Polyamines	多胺	131.1	130.122	[M+H]+	C5H14N4	2.33568e+06	2.78293e+06	2.99041e+06	2.69708e+06	2.91888e+06	1.58158e+06	2.1009e+06	1.80789e+06	1.67526e+06	1.94008e+06	1.91235e+06	2.26086e+06	2.47969e+06	2.33805e+06	2.53004e+06	2.403e+06	1.9719e+06	2.55132e+06	2.47596e+06	2.3536e+06	2.20272e+06	1.49548e+06	2.01198e+06	2.31981e+06	2.17622e+06	2.09014e+06	2.13253e+06	2.15957e+06	2.15955e+06	2.08945e+06	C00179	HMDB0001432	199	306-60-5	17431	3523	ko00330,ko01100
MEDP1196	Biotinamide	生物素酰胺	Alcohol and amines	醇、胺类	Polyamines	多胺	244.1	243.104	[M+H]+	C10H17N3O2S	8.32384e+06	6.6878e+06	7.70073e+06	3.88302e+06	7.13974e+06	4.83443e+06	7.27488e+06	8.00033e+06	8.57199e+06	8.28718e+06	5.54114e+06	8.56953e+06	8.60307e+06	7.8819e+06	5.16555e+06	7.13005e+06	1.28996e+07	5.2163e+06	5.79551e+06	6.02113e+06	5.46384e+06	8.70633e+06	1.01047e+07	6.24739e+06	5.7357e+06	5.73506e+06	5.85015e+06	5.76914e+06	5.76917e+06	5.74316e+06	C01893	HMDB0001458	5006	6929-42-6	16615	6255	-
MEDN1186	Formamide	甲酰胺	Alcohol and amines	醇、胺类	Polyamines	多胺	243.1	244.082	[M-H]-	C9H16N4S2	20362.7	53837.9	31121.2	54133.7	22062.4	26662.6	102529	130206	84096	141518	137583	102172	224002	451840	369223	187452	244265	82972.1	77257.4	38933.4	37621.2	11483.7	121629	155223	69234.3	66816.1	68609.4	66471	66161.5	69534.8	C00488	HMDB0001536	713	75-12-7	16397	4182	ko00910,ko01100,ko01200
MEDP1197	Hypotaurocyamine	下金胺	Alcohol and amines	醇、胺类	Polyamines	多胺	152	151.042	[M+H]+	C3H9N3O2S	730003	4.24864e+06	5.68045e+06	5.36099e+06	1.58938e+06	4.17684e+06	411348	780882	869054	303468	573989	253773	2.52455e+06	2.62632e+06	511889	3.951e+06	1.86605e+06	1.31887e+06	137001	220985	418077	989557	445191	498267	2.86165e+06	2.89587e+06	2.86177e+06	2.85819e+06	2.886e+06	2.88582e+06	C02419	-	11062553	1119-54-6	-	-	-
MEDN1171	Lythramine	Lythramine	Alcohol and amines	醇、胺类	Polyamines	多胺	478.3	479.267	[M-H]-	C29H37NO5	4.16297	4.09994	4.14995	4.08979	4.15236	4.15119	6079.18	5875.49	3491.71	5956.26	4270.69	4868.5	1.09713	1.09713	1.09713	1.09713	1.09713	1.09713	3264.51	1489.39	2337.49	1111.73	4507.79	4737.7	9982.13	9574.58	9591.42	8862.73	10171.5	10233.7	C10604	-	442864	32420-56-7	-	-	-
MEDN1125	N,N′-dicyclohexylcarbodiimide	N,N‘-二环己基碳二亚胺	Alcohol and amines	醇、胺类	Polyamines	多胺	205.2	206.178	[M-H]-	C13H22N2	6.6554e+06	6.29169e+06	6.39938e+06	6.74595e+06	5.87186e+06	7.02813e+06	5.78669e+06	5.81439e+06	5.11342e+06	5.23456e+06	5.48851e+06	5.25469e+06	5.60388e+06	4.98641e+06	5.35855e+06	5.22343e+06	4.44373e+06	4.43354e+06	5.15029e+06	5.25334e+06	4.75632e+06	4.6742e+06	5.07101e+06	4.33697e+06	5.35073e+06	5.39194e+06	5.3506e+06	5.40344e+06	5.33716e+06	5.33715e+06	C93487	-	10868	538-75-0	-	-	-
MEDN1658	N-Acetyldopamine	N-乙酰多巴胺	Alcohol and amines	醇、胺类	Polyamines	多胺	194.1	195.09	[M-H]-	C10H13NO3	7.24606	7.24606	7.24606	7.24606	7.24606	7.24606	3165.46	22175.9	16596.9	2443.12	2978.99	19906.2	1882.45	4564.59	2361.3	3901.99	2316.95	2012.31	2282.75	986.84	1977.41	1001.18	1080.46	2237.37	21050.3	20832.3	21049.1	20808.5	20801.2	21243.7	D70944	HMDB0041943	100526	2494-12-4	-	-	-
MEDP1218	3-Amino-2-menacarboxylic acid	3-氨基-2-甲萘甲酸	Benzene and substituted derivatives	苯及其衍生物	Phenolic acids	酚酸类	170.1	187.063	[M-H2O+H]+	C11H9NO2	207204	306244	255715	317418	224177	186929	770018	878359	669765	931219	1.00491e+06	772002	900922	2.51454e+06	2.27955e+06	1.22416e+06	2.12891e+06	562319	654825	323666	340793	73461.4	741175	818467	482846	454947	482566	465902	466390	486484	-	-	22244	5959-52-4	-	-	-
MEDN1909	4-Hydroxybenzoic Acid	4-羟基苯甲酸	Benzene and substituted derivatives	苯及其衍生物	Phenolic acids	酚酸类	137	138.032	[M-H]-	C7H6O3	388513	331331	313295	335445	354407	311704	277616	340915	304559	299297	337854	353771	329442	339830	332334	323579	387076	319054	343574	322046	382701	357769	339788	391565	364425	364713	370695	363658	369154	367638	C00156	HMDB0000500	135	99-96-7	30763	5486	ko00130,ko00790,ko01100,ko01240
MEDP1242	4-tert-butylbenzoic acid	4-叔丁基苯甲酸	Benzene and substituted derivatives	苯及其衍生物	Phenolic acids	酚酸类	179.1	178.099	[M+H]+	C11H14O2	741480	658323	443739	1.21474e+06	1.15183e+06	1.39482e+06	661387	579228	691142	427461	516633	431448	976098	869173	891341	838570	975890	1.06883e+06	999800	1.08046e+06	773368	786416	829744	569806	553677	550572	553677	551397	554552	554550	C14535	-	17395535	98-73-7	-	-	-
MEDP0101	P-Coumaric Acid	4-香豆酸	Benzene and substituted derivatives	苯及其衍生物	Phenolic acids	酚酸类	165	164.047	[M+H]+	C9H8O3	99393.1	532915	1.17722e+06	376727	51358	407544	574420	352465	528835	378272	167488	607764	0.9248	460722	111343	187055	185633	656319	0.926217	0.965006	0.97927	0.924815	0.924799	0.9248	1.53566e+06	1.72956e+06	1.76654e+06	1.63962e+06	1.68646e+06	1.68606e+06	C00811	HMDB0002035	637542	501-98-4	32374	6450	ko00130,ko00350,ko01100
MEDP1803	Synephrine	辛弗林	Benzene and substituted derivatives	苯及其衍生物	Phenolic acids	酚酸类	168.1	167.095	[M+H]+	C9H13NO2	375937	431146	299583	332117	386523	448455	588356	810326	812530	567015	588252	649861	258124	283340	191182	238433	371968	336592	402548	589291	378482	476643	470865	435758	358535	358717	362626	365480	354741	365373	C04548	HMDB0004826	7172	94-07-5	29081	7088	-
MEDP0244	All-Trans-13,14-Dihydroretinol	反式-13,14-二羟视黄醇	CoEnzyme and vitamins	辅酶和维生素	CoEnzyme and vitamins	辅酶和维生素	289	288.245	[M+H]+	C20H32O	14.7405	14.7405	14.7405	14.7405	14.7405	14.7405	103165	148989	144243	133402	137987	71424.8	90728	125719	88593.5	126002	108980	102427	151585	86930.1	115636	148751	113428	146909	115551	115499	113792	117824	113596	113567	C15492	HMDB0011618	446798	115797-14-3	52075	-	ko00830
MEDP0143	Biotin	D-生物素	CoEnzyme and vitamins	辅酶和维生素	CoEnzyme and vitamins	辅酶和维生素	245.1	244.088	[M+H]+	C10H16N2O3S	1.29719e+06	1.23807e+06	2.12756e+06	3.61987e+06	2.39012e+06	3.30051e+06	4.6576e+06	3.77911e+06	6.13325e+06	2.28562e+06	4.36701e+06	4.27988e+06	2.26973e+06	4.0691e+06	3.77053e+06	3.13067e+06	2.86286e+06	1.73249e+06	8.05611e+06	9.37413e+06	9.56023e+06	1.19131e+07	1.23251e+07	1.14454e+07	3.40037e+06	3.40048e+06	3.34508e+06	3.37948e+06	3.39444e+06	3.37945e+06	C00120	HMDB0000030	171548	58-85-5	15956	243	ko00780,ko01100,ko01240,ko02010,ko04977
MEDN1055	D-Calcium Pantothenate	D-泛酸钙（维生素B5）	CoEnzyme and vitamins	辅酶和维生素	CoEnzyme and vitamins	辅酶和维生素	437.2	438.221	[M-H]-	C18H34N2O10	204797	100501	533501	539183	464782	575803	310347	275425	1.00663e+06	364184	588292	243553	209290	1.00195e+06	381650	262467	718342	501628	682164	621886	413883	993611	1.05186e+06	2.12556e+06	513169	443746	511670	474399	493214	515447	-	-	443753	137-08-6	-	-	-
MEDP1231	Folinic acid	亚叶酸	CoEnzyme and vitamins	辅酶和维生素	CoEnzyme and vitamins	辅酶和维生素	474.2	473.166	[M+H]+	C20H23N7O7	11531.9	12737.7	9559.38	18982.2	5257	7850.82	12586	18506.7	42204.1	22959.1	33670.9	23529.8	0.67404	0.67404	0.67404	0.67404	0.67404	0.67404	20114.6	63082.1	13795	187683	24016.3	16366.3	37203.2	37202.6	37476.7	38046.6	36288.5	37309.3	C03479	HMDB0000121	135403648	58-05-9	27470	246	ko00670,ko01100
MEDP0242	Nicotinamide	烟酰胺	CoEnzyme and vitamins	辅酶和维生素	CoEnzyme and vitamins	辅酶和维生素	123.1	122.048	[M+H]+	C6H6N2O	3.74048e+07	3.64172e+07	3.91637e+07	2.8067e+07	2.51138e+07	3.47996e+07	1.00498e+07	1.15042e+07	1.08225e+07	1.31314e+07	9.71745e+06	9.62563e+06	2.41723e+07	1.86184e+07	2.80503e+07	2.40365e+07	3.51176e+07	2.0081e+07	1.54188e+07	1.27094e+07	1.73451e+07	1.91885e+07	1.66686e+07	1.58139e+07	2.29393e+07	2.29399e+07	2.2793e+07	2.29725e+07	2.28912e+07	2.28913e+07	C00153	HMDB0001406	936	98-92-0	17154	1497	ko00760,ko01100,ko01240,ko04212,ko04977
MEDN0244	Orotic Acid	乳清酸	CoEnzyme and vitamins	辅酶和维生素	CoEnzyme and vitamins	辅酶和维生素	155	156.017	[M-H]-	C5H4N2O4	9.38377e+06	1.00507e+07	1.14015e+07	9.0541e+06	3.47903e+06	6.46787e+06	2.4669e+07	3.20258e+07	5.50586e+07	2.42613e+07	3.26613e+07	1.72252e+07	7.8818e+06	6.17657e+06	1.04992e+07	5.50809e+06	6.75685e+06	6.05873e+06	4.2219e+07	4.17404e+07	4.83904e+07	2.40287e+07	6.45335e+07	6.1808e+07	2.15676e+07	2.15559e+07	2.15676e+07	2.18411e+07	2.11983e+07	2.18184e+07	C00295	HMDB0000226	967	65-86-1	16742	318	ko00240,ko01100,ko01240
MEDP0389	Pantetheine	泛酰巯基乙胺	CoEnzyme and vitamins	辅酶和维生素	CoEnzyme and vitamins	辅酶和维生素	279.1	278.13	[M+H]+	C11H22N2O4S	2.34214e+08	2.22738e+08	2.51419e+08	2.32674e+08	2.29696e+08	221275585	2.12715e+08	2.28711e+08	2.20124e+08	2.36568e+08	2.31366e+08	2.34002e+08	1.97553e+08	2.17795e+08	2.23717e+08	6.72536e+07	2.6838e+08	2.09475e+08	2.53161e+08	2.49603e+08	2.31808e+08	2.01315e+08	2.47226e+08	2.52323e+08	2.34446e+08	2.40493e+08	2.34536e+08	2.36359e+08	2.3727e+08	2.34595e+08	C00831	HMDB0003426	479	496-65-1	16753	6928	ko00770,ko01100
MEDN0245	Pantothenate	泛酸	CoEnzyme and vitamins	辅酶和维生素	CoEnzyme and vitamins	辅酶和维生素	218.1	219.1	[M-H]-	C9H17NO5	3.70845e+07	2.76441e+07	5.71216e+07	5.75136e+07	5.79289e+07	50207451	4.10987e+07	3.90894e+07	6.87687e+07	3.78453e+07	5.26319e+07	3.63354e+07	3.9995e+07	6.02928e+07	5.3715e+07	2.9615e+07	5.09651e+07	6.56899e+07	7.28088e+07	8.09205e+07	5.68423e+07	7.54933e+07	7.61438e+07	9.22339e+07	4.62015e+07	4.49098e+07	4.61763e+07	4.57078e+07	4.57043e+07	4.65801e+07	C00864	HMDB0000210	988	79-83-4	46905	-	ko00410,ko00770,ko01100,ko01240,ko04977
MEDP1468	Pantothenol	DL-泛酰醇	CoEnzyme and vitamins	辅酶和维生素	CoEnzyme and vitamins	辅酶和维生素	206	205.131	[M+H]+	C9H19NO4	269150	293618	586016	835984	1.30795e+06	272909	154660	128780	244070	1.05963e+06	1.03079e+06	405879	7.48305e+06	1.33605e+06	126506	128763	78924.4	152676	148651	622721	289696	2.8426e+06	925961	399767	48940.5	56029.5	49881.7	50618.2	49456	53987.7	C05944	HMDB0004231	4678	16485-10-2	895821	7032	ko00770
MEDP0393	Pyridoxine 5'-Phosphate	5-磷酸吡哆醇	CoEnzyme and vitamins	辅酶和维生素	CoEnzyme and vitamins	辅酶和维生素	250	249.04	[M+H]+	C8H12NO6P	3.18343	5308.19	4749.93	1924.4	6115.88	4876.25	4062.64	6061.01	6080.5	5218.35	2311.54	5037.05	12874.5	39972.9	26716.2	65134.7	29253.2	16900.2	0.887896	0.887896	0.887896	0.887896	0.887896	0.887896	15560.1	15959.1	16402.4	11383.2	16506.4	16519.4	C00627	HMDB0001319	1055	447-05-2	28803	6156	ko00750,ko01100,ko01240
MEDP0250	Riboflavin	核黄素	CoEnzyme and vitamins	辅酶和维生素	CoEnzyme and vitamins	辅酶和维生素	377	376.138	[M+H]+	C17H20N4O6	7.20824e+07	4.97912e+07	7.99472e+07	6.48852e+07	1.04215e+08	6.17725e+07	5.35682e+07	5.04187e+07	6.46204e+07	4.41435e+07	5.72193e+07	5.50252e+07	8.35613e+07	1.37879e+08	8.08333e+07	9.16974e+07	1.28718e+08	6.83139e+07	1.51657e+08	1.39508e+08	1.03316e+08	1.25856e+08	1.74603e+08	1.06916e+08	4.85778e+07	4.94422e+07	4.94434e+07	4.93466e+07	4.92661e+07	4.93465e+07	C00255	HMDB0000244	493570	83-88-5	-	-	ko00740,ko01100,ko01240,ko02010,ko04977
MEDP0514	Thiamine	硫胺素	CoEnzyme and vitamins	辅酶和维生素	CoEnzyme and vitamins	辅酶和维生素	265.1	265.112	[M]+	C12H17N4OS+	723310	423740	746160	1.53664e+06	555759	776666	868411	816039	1.07933e+06	338548	446287	1.77912e+06	226215	280041	244314	234687	770973	172643	1.51531e+06	1.17888e+06	658989	372531	1.299e+06	1.51919e+06	704452	750535	704798	736935	736710	716597	C00378	HMDB0000235	1130	59-43-8	18385	5242	ko00730,ko01100,ko01240,ko02010,ko04122,ko04977
MEDP0251	Trigonelline	葫芦巴碱	CoEnzyme and vitamins	辅酶和维生素	CoEnzyme and vitamins	辅酶和维生素	138	137.048	[M+H]+	C7H7NO2	379199	253194	336913	80367.5	71331.5	192842	25845.4	4.76602	33105.2	29405.9	22287.8	4.898	24674	164537	53168.5	106230	102067	229669	41517.5	64379.8	44391.2	38808.3	13949.5	35195.1	123185	126194	123113	127474	120690	127428	C01004	HMDB0000875	5570	535-83-1	18123	273	ko00760
MEDP1654	1-Methyladenosine	1-甲基腺苷	Nucleotide And Its metabolites	核苷酸及其代谢物	Nucleotide And Its metabolites	核苷酸及其代谢物	282.1	281.112	[M+H]+	C11H15N5O4	93336.8	310446	382136	378027	46265.7	429662	34429	32365.1	23008.9	23106.1	34913.6	30252.8	52038.7	503372	170358	130297	64246.7	266999	57024.2	47359.5	57035	53286.2	62770.6	56548.7	216740	218279	216740	216443	218531	218587	C02494	-	27476	15763-06-1	-	-	-
MEDP1162	1-Methylguanine	1-甲基鸟嘌呤	Nucleotide And Its metabolites	核苷酸及其代谢物	Nucleotide And Its metabolites	核苷酸及其代谢物	166.1	165.065	[M+H]+	C6H7N5O	9.83549e+06	6.6714e+06	1.04264e+07	1.35419e+07	7.62044e+06	1.36495e+07	1.50917e+06	1.74717e+06	1.14775e+06	1.36878e+06	1.43699e+06	859364	6.28123e+06	6.74759e+06	9.69123e+06	6.0747e+06	4.23033e+06	9.25049e+06	2.18921e+07	2.00485e+07	1.92856e+07	2.37517e+07	2.84581e+07	1.79923e+07	7.14185e+06	7.16574e+06	7.15007e+06	7.16195e+06	7.16197e+06	7.13437e+06	C04152	HMDB0003282	3778	938-85-2	21803	3778	-
MEDP2421	1-Methylguanosine	1-甲基鸟苷	Nucleotide And Its metabolites	核苷酸及其代谢物	Nucleotide And Its metabolites	核苷酸及其代谢物	298.1	297.107	[M+H]+	C11H15N5O5	2.99284e+07	3.05515e+07	5.18264e+07	5.45413e+07	2.37664e+07	4.12524e+07	3.26714e+06	4.48646e+06	4.39896e+06	2.0995e+06	3.54032e+06	3.47468e+06	4.43628e+07	6.39795e+07	5.63452e+07	6.22056e+07	4.70334e+07	5.12846e+07	1.30877e+07	9.63303e+06	1.03242e+07	7.17132e+06	1.46969e+07	3.55131e+06	2.01249e+07	2.02732e+07	2.01044e+07	2.01341e+07	2.02474e+07	2.02466e+07	C04545	HMDB0001563	96373	2140-65-0	19062	6324	-
MEDP1713	1-Methylinosine	1-甲基肌苷	Nucleotide And Its metabolites	核苷酸及其代谢物	Nucleotide And Its metabolites	核苷酸及其代谢物	283.1	282.096	[M+H]+	C11H14N4O5	881292	761194	2.1683e+06	2.08177e+06	673793	1.83332e+06	34269.9	25679.6	35657.7	14352.8	54090.9	23673.6	1.48277e+06	3.33498e+06	2.07947e+06	2.09736e+06	1.5744e+06	2.51163e+06	1.03469e+06	651902	663575	458384	1.10213e+06	298817	651971	651971	653279	647431	654436	656418	C12317	HMDB0002721	65095	2140-73-0	19065	3780	-
MEDP0148	1-Methylxanthine	1-甲基黄嘌呤	Nucleotide And Its metabolites	核苷酸及其代谢物	Nucleotide And Its metabolites	核苷酸及其代谢物	167.1	166.049	[M+H]+	C6H6N4O2	91268.2	105887	173145	178691	84455.5	168688	40336.6	22427.8	23111.4	5944.35	19589.2	35568.8	166454	198095	230632	256760	156826	209790	44264.7	36920	40913.1	29879.4	36402.5	33990.5	75962	69401.2	69692.4	66971	77130.8	68429	C16358	HMDB0010738	80220	6136-37-4	68444	-	ko00232,ko01100
MEDN1677	2'-Aenylic Acid	腺苷-2'-磷酸	Nucleotide And Its metabolites	核苷酸及其代谢物	Nucleotide And Its metabolites	核苷酸及其代谢物	346.1	347.063	[M-H]-	C10H14N5O7P	2.0839e+06	3.6169e+06	3.6744e+06	2.98987e+06	2.77185e+06	4.48004e+06	265056	260662	236468	657073	277864	110449	1.16772e+06	4.61292e+06	3.80826e+06	2.52015e+06	1.49031e+06	5.03013e+06	39922.9	42704.5	196947	685906	54762	11364	1.88749e+06	1.86299e+06	1.90114e+06	1.87831e+06	1.88926e+06	1.8784e+06	C00946	-	94136	130-49-4	-	-	-
MEDN1711	2'-Deoxyadenosine-5'-diphosphate(dADP)	2ˊ-脱氧腺苷 5ˊ-二磷酸	Nucleotide And Its metabolites	核苷酸及其代谢物	Nucleotide And Its metabolites	核苷酸及其代谢物	410	411.035	[M-H]-	C10H15N5O9P2	45097.7	46624.6	214457	103544	157251	154606	675.45	5756.38	3849.11	6395.95	2885.65	1271.37	76907.2	54928.4	17514.9	48185.9	40278.1	278537	1862.14	1731.69	2361.46	6579.89	2255.42	7.19412	56243.4	59165.5	59183	57749.4	57744.1	58292.7	C00206	-	188966	2793-06-8	-	-	ko00230,ko01100,ko01232
MEDP1950	2'-Deoxyinosine-5'-monophosphate	2'-脱氧肌苷-5'-单磷酸	Nucleotide And Its metabolites	核苷酸及其代谢物	Nucleotide And Its metabolites	核苷酸及其代谢物	333.1	332.052	[M+H]+	C10H13N4O7P	5.26836e+07	2.06311e+08	2.18559e+08	1.4166e+08	7.34145e+07	1.67042e+08	9.73644e+07	9.75993e+07	106606120	5.4174e+07	1.4701e+08	1.12255e+08	2.27001e+08	1.45238e+08	1.12135e+08	1.83933e+08	1.07022e+08	1.47881e+08	8.7982e+07	1.64059e+08	1.77537e+08	1.32725e+08	1.18651e+08	7.33395e+07	8.17678e+07	8.42171e+07	7.74363e+07	8.38664e+07	8.20913e+07	7.51812e+07	C06196	HMDB0006555	135398614	3393-18-8	28806	-	ko00230,ko01232
MEDN0141	2'-Deoxyuridine	2'-脱氧尿苷	Nucleotide And Its metabolites	核苷酸及其代谢物	Nucleotide And Its metabolites	核苷酸及其代谢物	227.1	228.075	[M-H]-	C9H12N2O5	6584.91	35692.8	49208.9	35613.4	6048.46	13292.6	10917	4823.53	19737	20701.3	11409.6	5838.07	8618.74	3600.66	3336.48	13559.6	5904.99	9815.6	17199.4	29002.6	63092.6	12763.5	39219.2	28571.3	21614.7	21720.9	21613.8	21465.2	21483.9	21855.3	C00526	HMDB0000012	13712	951-78-0	16450	5086	ko00240,ko01100,ko01232,ko02010
MEDP1719	2'-O-Methylguanosine	2'-O-甲基鸟苷	Nucleotide And Its metabolites	核苷酸及其代谢物	Nucleotide And Its metabolites	核苷酸及其代谢物	298.1	297.107	[M+H]+	C11H15N5O5	984935	1.02289e+06	1.78038e+06	1.78553e+06	803008	1.48004e+06	158994	185370	181983	93905.3	162727	168480	1.22211e+06	1.89481e+06	1.54824e+06	2.1445e+06	1.46621e+06	1.65762e+06	464672	374699	418326	248112	529362	154597	702788	699169	696070	697568	704739	697608	-	-	135406950	2140-71-8	-	-	-
MEDP1077	2'-O-methyladenosine	2'-O-甲基腺苷	Nucleotide And Its metabolites	核苷酸及其代谢物	Nucleotide And Its metabolites	核苷酸及其代谢物	282	281.112	[M+H]+	C11H15N5O4	1.92592e+08	2.28635e+08	2.46049e+08	1.78298e+08	6.31991e+07	266547037	1.08449e+06	1.39253e+06	1.12665e+06	1.43708e+06	936905	528414	1.06761e+08	489543579	5.36605e+08	2.96201e+08	1.82892e+08	5.72014e+08	1.54148e+06	1.01144e+06	1.85207e+06	3.81042e+06	2.2188e+06	1.30798e+06	9.97399e+07	8.90373e+07	9.79551e+07	9.84358e+07	9.32663e+07	9.64951e+07	C04779	HMDB0004326	102213	2140-79-6	119928	-	-
MEDN1501	2'-O-methyluridine	2'-甲氧基尿苷	Nucleotide And Its metabolites	核苷酸及其代谢物	Nucleotide And Its metabolites	核苷酸及其代谢物	257.1	258.085	[M-H]-	C10H14N2O6	8.3306	8.3306	8.3306	8.3306	8.3306	8.3306	42250.6	48083.4	56552.7	10635.3	12101.7	13978.4	7.12808	7.1208	7.12084	7.12084	7.12084	7.12084	29395.6	21013.1	40902.8	29903.9	42829.4	32556.9	14858.1	14767.3	15427.6	14998.5	14996.7	15576.2	-	HMDB0240328	102212	2140-76-3	-	-	-
MEDN0431	2-(Dimethylamino)Guanosine	二甲基鸟苷	Nucleotide And Its metabolites	核苷酸及其代谢物	Nucleotide And Its metabolites	核苷酸及其代谢物	310.1	311.123	[M-H]-	C12H17N5O5	456227	407126	1.0841e+06	1.39157e+06	391913	1.38608e+06	14182.8	11911.6	11738.8	9370.79	14782.7	10266.2	931252	1.53057e+06	970426	908673	873449	1.0637e+06	335733	242128	262318	55040.4	379698	59847	377176	377181	375363	376012	375759	377370	C74036	HMDB0004824	92919	2140-67-2	19289	7086	-
MEDP1100	2-Aminomethylpyrimidine	2-氨基甲基嘧啶	Nucleotide And Its metabolites	核苷酸及其代谢物	Nucleotide And Its metabolites	核苷酸及其代谢物	110.1	109.064	[M+H]+	C5H7N3	39009.2	143965	192741	65672.6	13033.3	96110.6	44873.9	36443.2	68625.6	31734.1	13467	50842.2	4118.92	2669.81	3037.97	3316.64	3794.07	6827.12	2685.34	1214.8	1628.98	2424.71	966.393	4208.82	183101	183439	177222	193946	175605	174877	-	-	17848325	372118-67-7	-	-	-
MEDP1956	2-Aminopurine	2-氨基嘌呤	Nucleotide And Its metabolites	核苷酸及其代谢物	Nucleotide And Its metabolites	核苷酸及其代谢物	136.1	135.054	[M+H]+	C5H5N5	191058	2.14053e+06	5.43907e+06	1.1551e+06	676795	1.84524e+06	455539	733442	471880	218723	722607	547575	764228	5.50869e+06	1.20886e+06	1.94414e+07	1.5865e+06	2.03455e+06	2.04435e+06	3.13573e+06	6.13931e+06	1.94429e+06	4.19236e+06	3.02097e+06	2.42759e+06	2.42766e+06	2.47109e+06	2.4458e+06	2.43091e+06	2.43093e+06	-	-	9955	452-06-2	-	-	-
MEDN1675	2-Deoxyribose 5'-phosphate	2-脱氧核糖-5'-磷酸	Nucleotide And Its metabolites	核苷酸及其代谢物	Nucleotide And Its metabolites	核苷酸及其代谢物	213	214.024	[M-H]-	C5H11O7P	85288.8	147745	161037	142023	306728	98042.5	110548	148603	148180	116423	135449	151732	115110	116939	122995	106837	151569	130411	298539	183577	380461	184291	250376	271749	156006	140264	155877	150840	151705	150009	C00673	-	92043155	102916-66-5	-	-	ko00030,ko01100
MEDP0151	2-Hydroxy-6-Aminopurine	2-羟基-6-氨基嘌呤	Nucleotide And Its metabolites	核苷酸及其代谢物	Nucleotide And Its metabolites	核苷酸及其代谢物	152.1	151.049	[M+H]+	C5H5N5O	411378	1.63795e+06	1.50118e+06	747641	368640	1.35348e+06	296180	504910	710450	246402	389653	286510	393955	902956	794493	810361	565766	919341	326232	544592	716852	914860	1.15903e+06	924605	1.06265e+06	1.06261e+06	1.0713e+06	1.07984e+06	1.05171e+06	1.05127e+06	C74731	HMDB0000403	76900	3373-53-3	62462	5392	-
MEDN0143	3'-Adenylic acid	腺苷-3'-磷酸	Nucleotide And Its metabolites	核苷酸及其代谢物	Nucleotide And Its metabolites	核苷酸及其代谢物	346.1	347.063	[M-H]-	C10H14N5O7P	2.0839e+06	3.6169e+06	3.6744e+06	2.98987e+06	2.77185e+06	4.48004e+06	265056	260662	236468	657073	277864	110449	1.16772e+06	4.61292e+06	3.80826e+06	2.52015e+06	1.49031e+06	5.03013e+06	39922.9	42704.5	196947	685906	54762	11364	1.88749e+06	1.86299e+06	1.90114e+06	1.87831e+06	1.88926e+06	1.8784e+06	C01367	HMDB0003540	41211	84-21-9	28931	-	ko00230,ko01100
MEDN0624	5'-Adenylyl sulfate(APS)	5'-腺苷酸硫酸(APS)	Nucleotide And Its metabolites	核苷酸及其代谢物	Nucleotide And Its metabolites	核苷酸及其代谢物	426	427.02	[M-H]-	C10H14N5O10PS	3.09507e+06	4.55849e+06	5.865e+06	5.83347e+06	2.87513e+06	7.13573e+06	15749.6	13798.8	6472.07	17058.1	11697.3	8241.17	4.45903e+06	1.26847e+07	6.25448e+06	9.26326e+06	6.40794e+06	8.05503e+06	64932.2	24015.1	84541.9	694592	39669.9	12.2522	2.67751e+06	2.74242e+06	2.74137e+06	2.70716e+06	2.71567e+06	2.727e+06	C00224	HMDB0001003	10238	485-84-7	17709	5933	ko00230,ko00261,ko00920,ko01100
MEDP0401	5'-Deoxy-5'-(Methylthio) Adenosine	5-脱氧-5-甲硫腺苷	Nucleotide And Its metabolites	核苷酸及其代谢物	Nucleotide And Its metabolites	核苷酸及其代谢物	298	297.09	[M+H]+	C11H15N5O3S	1.95374e+06	1.92472e+06	3.01228e+06	1.16432e+06	977736	1.18186e+06	148709	116888	158959	171245	137960	168117	179062	341582	244928	648645	400640	233530	306259	261100	296142	440270	372273	274271	951881	951877	945640	947380	947472	970501	C00170	HMDB0001173	439176	2457-80-9	17509	3425	ko00270,ko01100
MEDP1202	5'-Deoxy-5'-fluoroadenosine	5'-脱氧-5'-氟腺苷	Nucleotide And Its metabolites	核苷酸及其代谢物	Nucleotide And Its metabolites	核苷酸及其代谢物	270.1	269.092	[M+H]+	C10H12FN5O3	30141.5	366227	1.01673e+06	204465	105436	329414	79897.4	159495	82985.5	45281	134621	117807	70232.2	862680	132715	2.87439e+06	246436	235163	330153	474822	988882	213093	673433	488542	455804	458950	458931	455839	459053	459061	C19766	-	448403	731-98-6	-	-	-
MEDP2540	5-Acetylamino-6-amino-3-methyluracil	5-乙酰氨基-6-氨基-3-甲基尿嘧啶	Nucleotide And Its metabolites	核苷酸及其代谢物	Nucleotide and Its metabolites	核苷酸及其代谢物	199.1	198.075	[M+H]+	C7H10N4O3	286335	218655	188384	207084	219504	215772	408218	337915	306433	327826	258044	287973	334638	266352	232324	278591	285748	274324	394416	427467	310894	374747	300057	381917	326316	266790	330423	325801	314662	314349	C16366	HMDB0004400	88299	19893-78-8	-	-	ko00232
MEDN1513	5-Hydroxy-2'-deoxyuridine	5-羟基-2'-脱氧尿苷	Nucleotide And Its metabolites	核苷酸及其代谢物	Nucleotide And Its metabolites	核苷酸及其代谢物	243.1	244.07	[M-H]-	C9H12N2O6	69655.1	247289	414297	231170	68920.5	228407	92684.2	66074.6	105959	35813.8	106674	8.69742	145663	123051	22281.9	113336	129092	39717.8	13334.1	13520.1	49309.5	57701.1	20171.5	23272.1	146343	149098	147688	148697	143342	148732	-	-	96622	5168-36-5	-	-	-
MEDP0526	6-Dimethylaminopurine	6-二甲基氨基嘌呤	Nucleotide And Its metabolites	核苷酸及其代谢物	Nucleotide And Its metabolites	核苷酸及其代谢物	164.1	163.086	[M+H]+	C7H9N5	3.55372e+06	3.61719e+06	3.48363e+06	3.28523e+06	3.37618e+06	3.48764e+06	4.09067e+06	4.24914e+06	4.17595e+06	3.92241e+06	4.21933e+06	4.07791e+06	5.5102e+06	5.75171e+06	5.90035e+06	5.85905e+06	4.87885e+06	5.38052e+06	5.44299e+06	5.99315e+06	5.90634e+06	6.10355e+06	5.82662e+06	4.84315e+06	3.50842e+06	3.50591e+06	3.62965e+06	3.58584e+06	3.52197e+06	3.52203e+06	-	HMDB0000473	3134	938-55-6	60281	5460	-
MEDP1073	6-O-methylguanine	6-O-甲基鸟嘌呤	Nucleotide And Its metabolites	核苷酸及其代谢物	Nucleotide And Its metabolites	核苷酸及其代谢物	166.1	165.065	[M+H]+	C6H7N5O	9.83549e+06	6.6714e+06	1.04264e+07	1.35419e+07	7.62044e+06	1.36495e+07	1.50917e+06	1.74717e+06	1.14775e+06	1.36878e+06	1.43699e+06	859364	6.28123e+06	6.74759e+06	9.69123e+06	6.0747e+06	4.23033e+06	9.25049e+06	2.18921e+07	2.00485e+07	1.92856e+07	2.37517e+07	2.84581e+07	1.79923e+07	7.14185e+06	7.16574e+06	7.15007e+06	7.16195e+06	7.16197e+06	7.13437e+06	-	-	65275	20535-83-5	-	-	-
MEDP2511	6-Thio-dG	2’-脱氧硫鸟苷	Nucleotide And Its metabolites	核苷酸及其代谢物	Nucleotide And Its metabolites	核苷酸及其代谢物	284.1	283.074	[M+H]+	C10H13N5O3S	4.84566	4.84566	4.84566	4.84566	4.84566	4.84566	654855	789139	391393	473836	595474	397823	69237.1	49760.4	81699.3	65602.3	149491	37075	27284.6	21543.5	13004	2.86115e+06	25963.3	2.25496e+06	204259	203505	220598	209189	200221	209232	-	-	3000603	789-61-7	-	-	-
MEDP1960	7-(alpha-D-glucosyl)-N(6)-isopentenyladenine	7-（α-D-葡萄糖基）-N（6）-异戊烯基亚丁	Nucleotide And Its metabolites	核苷酸及其代谢物	Nucleotide And Its metabolites	核苷酸及其代谢物	366.2	365.17	[M+H]+	C16H23N5O5	7.07232e+06	3.57772e+06	4.2233e+06	2.25813e+06	2.15245e+06	6.54625e+06	7.03375e+06	5.17152e+06	5.44646e+06	6.3489e+06	5.38884e+06	6.00445e+06	5.24395e+06	5.09801e+06	4.17338e+06	4.00948e+06	9.3459e+06	2.65308e+06	9.71208e+06	1.05492e+07	8.00565e+06	9.12288e+06	9.29131e+06	1.06968e+07	6.35429e+06	6.24433e+06	6.85059e+06	6.40417e+06	6.39195e+06	6.62359e+06	-	-	-	-	-	-	-
MEDN1012	7-Methylguanine	7-甲基鸟嘌呤	Nucleotide And Its metabolites	核苷酸及其代谢物	Nucleotide And Its metabolites	核苷酸及其代谢物	164.1	165.065	[M-H]-	C6H7N5O	86170.9	39775.8	69416.3	94540.2	54842.5	86166.9	21.7465	21.7465	21.7465	21.7465	21.7465	21.7465	28895.9	23981.4	48261.6	21307.7	28408.9	38626.6	56368.4	67948.6	48820.1	75580.8	73814.6	56480.2	35642.6	34214.3	35837.5	35525.5	32240.2	35485	C02242	HMDB0000897	135398679	578-76-7	28664	-	-
MEDP1072	7-Methylguanosine	7-甲基鸟苷	Nucleotide And Its metabolites	核苷酸及其代谢物	Nucleotide And Its metabolites	核苷酸及其代谢物	298.1	297.107	[M+H]+	C11H15N5O5	2.99284e+07	3.05515e+07	5.18264e+07	5.45413e+07	2.37664e+07	4.12524e+07	3.26714e+06	4.48646e+06	4.39896e+06	2.0995e+06	3.54032e+06	3.47468e+06	4.43628e+07	6.39795e+07	5.63452e+07	6.22056e+07	4.70334e+07	5.12846e+07	1.30877e+07	9.63303e+06	1.03242e+07	7.17132e+06	1.46969e+07	3.55131e+06	2.01249e+07	2.02732e+07	2.01044e+07	2.01341e+07	2.02474e+07	2.02466e+07	-	HMDB0001107	135445750	20244-86-4	20794	6008	-
MEDP0157	7-Methylxanthine	7-甲基黄嘌呤	Nucleotide And Its metabolites	核苷酸及其代谢物	Nucleotide And Its metabolites	核苷酸及其代谢物	167	166.049	[M+H]+	C6H6N4O2	468076	403906	684987	696537	308774	529509	65649.6	87301	66663.3	39058.4	48696.7	41941.9	541834	804845	657662	884978	517721	724929	192763	153619	164817	122658	188452	75165.8	278700	279077	275120	278873	271097	278868	C16353	HMDB0001991	68374	552-62-5	48991	-	ko00232,ko01100
MEDP1498	8-Azaguanine	8-氮鸟嘌呤	Nucleotide And Its metabolites	核苷酸及其代谢物	Nucleotide And Its metabolites	核苷酸及其代谢物	153	152.045	[M+H]+	C4H4N6O	10625.9	91733.6	130155	91998.4	39378.3	72885	6861.44	17574.4	22508.5	5194.12	15021.5	4060.45	2.4239	2.4239	2.4239	2.4239	2.4239	2.4239	3782.23	11196.6	15846.4	22513.8	15729	17360.5	61176.4	60604.7	60661.8	61265.7	60778.8	60778.5	-	-	135403646	134-58-7	-	-	-
MEDN0433	8-Hydroxy-2-Deoxyguanosine	8-羟基-2-脱氧鸟苷	Nucleotide And Its metabolites	核苷酸及其代谢物	Nucleotide And Its metabolites	核苷酸及其代谢物	282.1	283.092	[M-H]-	C10H13N5O5	7.01373	7.02648	7.01373	7.01373	7.01373	7.01373	258012	300271	143477	149012	200714	142205	30218.4	21815.2	40547.3	33500.9	32412.5	26248	11424.9	15958.7	6845.62	1.31174e+06	7736.18	1.23937e+06	67647.7	66345.8	67684	66414.1	66387.2	68657.5	-	HMDB0003333	73318	88847-89-6	40304	6890	-
MEDP0158	8-Hydroxyguanosine	8-羟基鸟苷	Nucleotide And Its metabolites	核苷酸及其代谢物	Nucleotide And Its metabolites	核苷酸及其代谢物	300.1	299.087	[M+H]+	C10H13N5O6	50393.5	29189.8	49071.7	71975.7	31980.2	60770	2.16821e+06	3.62254e+06	2.3814e+06	1.44805e+06	2.99504e+06	1.85363e+06	451102	381244	468645	575602	330936	393260	82502.3	85593.1	120188	7.37631e+06	77900.8	7.54554e+06	798770	798360	813889	802831	810365	805194	-	HMDB0002044	65131	3868-31-3	1177182	-	-
MEDN0537	ADP-ribose	ADP核糖	Nucleotide And Its metabolites	核苷酸及其代谢物	Nucleotide And Its metabolites	核苷酸及其代谢物	558.1	559.072	[M-H]-	C15H23N5O14P2	327005	53954.7	39143	51052.3	67112	130006	2161.74	3362.87	1682.15	3842.45	3.00599	3850.31	167906	145289	361990	279403	322771	149260	1384.82	2373.05	2373.64	2303.59	2303.59	2691.53	182133	178584	182100	183586	179226	179282	C00301	HMDB0001178	6059	20762-30-5	16960	6059	ko00230,ko01100
MEDP0159	Adenine	腺嘌呤	Nucleotide And Its metabolites	核苷酸及其代谢物	Nucleotide And Its metabolites	核苷酸及其代谢物	136.1	135.055	[M+H]+	C5H5N5	2.23547e+06	2.78823e+06	3.44028e+06	3.79554e+06	1.66432e+06	3.60162e+06	167714	92742.4	164167	113760	79548.6	209472	289141	1.95884e+06	1.23755e+06	871926	715084	1.14645e+06	43098	39128.5	39128.5	4.8809	50470.6	27218.4	1.8133e+06	1.87539e+06	1.87525e+06	1.73253e+06	1.88626e+06	1.88977e+06	C00147	HMDB0000034	190	73-24-5	16708	85	ko00230,ko01100,ko01232
MEDP0160	Adenosine	腺苷	Nucleotide And Its metabolites	核苷酸及其代谢物	Nucleotide And Its metabolites	核苷酸及其代谢物	268.1	267.097	[M+H]+	C10H13N5O4	1.96388e+06	3.10579e+07	8.43447e+07	1.57571e+07	9.02314e+06	2.58701e+07	7.16593e+06	1.25956e+07	6.69367e+06	2.96148e+06	1.13817e+07	9.54336e+06	9.13313e+06	107821365	1.38827e+07	3.53939e+08	3.03216e+07	2.85528e+07	4.06657e+07	6.01693e+07	1.17172e+08	2.36476e+07	8.66396e+07	5.90981e+07	3.76725e+07	3.73554e+07	3.74001e+07	3.72777e+07	3.72784e+07	3.75405e+07	C00212	HMDB0000050	60961	58-61-7	16335	86	ko00230,ko01100,ko01232,ko02010,ko04022,ko04024,ko04071,ko04080,ko04270,ko04923,ko04924,ko05012,ko05032,ko05034
MEDN0152	Adenosine 5'-Diphosphate（ADP）	二磷酸腺苷	Nucleotide And Its metabolites	核苷酸及其代谢物	Nucleotide And Its metabolites	核苷酸及其代谢物	426	427.029	[M-H]-	C10H15N5O10P2	4.56548e+06	7.10942e+06	8.48837e+06	9.39599e+06	4.8566e+06	9.83942e+06	7297.54	12174.6	5984.28	9221.48	11334.9	4865.84	6.81461e+06	1.93789e+07	8.90592e+06	1.4502e+07	1.09149e+07	1.22965e+07	31886	19833.9	48592.3	242629	14785.2	12435.5	4.39637e+06	4.43073e+06	4.42347e+06	4.45447e+06	4.4574e+06	4.36612e+06	C00008	HMDB0001341	6022	58-64-0	16761	6175	ko00190,ko00230,ko01100,ko01232,ko01240,ko04068,ko04080,ko04142,ko04152,ko04611,ko04714,ko04742,ko04924,ko05012,ko05014,ko05022
MEDN0153	Adenosine 5'-Monophosphate	5'-腺嘌呤核苷酸	Nucleotide And Its metabolites	核苷酸及其代谢物	Nucleotide And Its metabolites	核苷酸及其代谢物	346.1	347.063	[M-H]-	C10H14N5O7P	6.54374e+06	8.98318e+06	9.02282e+06	9.93354e+06	4.32996e+06	9.92963e+06	9.02256	9.02256	9.02256	9.02256	9.02256	9.02256	4.06689e+06	1.27161e+07	1.43981e+07	8.81808e+06	7.21669e+06	1.64552e+07	8.4696	8.4696	8.4696	8.4696	8.4696	8.4696	4.29646e+06	4.34245e+06	4.34231e+06	4.29768e+06	4.30351e+06	4.34108e+06	C00020	HMDB0000045	6083	61-19-8	16027	5111	ko00230,ko01100,ko01232,ko01240,ko01523,ko04022,ko04024,ko04068,ko04150,ko04151,ko04152,ko04211,ko04740,ko04742,ko04923,ko04924,ko04925,ko04927,ko04928,ko04934,ko05012,ko05022,ko05032
MEDN1332	Adenosine-5'-Diphosphoglucose	腺苷5'-二磷酸葡萄糖	Nucleotide And Its metabolites	核苷酸及其代谢物	Nucleotide And Its metabolites	核苷酸及其代谢物	588	589.082	[M-H]-	C16H25N5O15P2	52843	44836.6	54930.4	75180.4	75888.6	76552.5	3.57546	2024.6	3819.94	3473.34	2084.84	3.57546	44770.3	72602	31866.7	68377.3	47841.6	33473.7	2886.19	915.001	713.069	1982	5467.36	8.54015	36331.7	39022.6	39015	38207.6	38996.1	38437.6	-	-	16218835	102129-65-7	-	-	-
MEDP1093	Allopurinol	别嘌醇	Nucleotide And Its metabolites	核苷酸及其代谢物	Nucleotide And Its metabolites	核苷酸及其代谢物	137	136.038	[M+H]+	C5H4N4O	2.6861e+06	2.32982e+07	3.55923e+07	3.48897e+07	1.27659e+07	2.52264e+07	800971	1.42464e+06	1.63677e+06	1.17738e+06	2.06642e+06	965201	1.97674e+07	2.97678e+07	6.67467e+06	3.34205e+07	3.40578e+07	1.36537e+07	3.75351	3.75351	3.75351	3.75351	3.75351	3.75351	1.67487e+07	1.68598e+07	1.67522e+07	1.68686e+07	1.66833e+07	1.6689e+07	D00224	HMDB0014581	135401907	315-30-0	40279	-	ko04976
MEDN1236	Cyclic ADP ribose	环状ADP核糖	Nucleotide And Its metabolites	核苷酸及其代谢物	Nucleotide And Its metabolites	核苷酸及其代谢物	540.1	541.061	[M-H]-	C15H21N5O13P2	199471	342036	546752	477851	369489	441385	5.79227	5.79227	5.79227	5.79227	5.79227	5.79227	819716	1.64557e+06	897546	821885	50150.8	1.17882e+06	17487.1	9.64301	15433.7	7197.76	20634.8	10318.1	236924	236074	226388	224873	233997	234047	C13050	-	583439	119340-53-3	-	-	ko04020,ko04921,ko04970,ko04972
MEDN0421	Cyclic Amp	腺苷-3'-5'-环单磷酸水合物	Nucleotide And Its metabolites	核苷酸及其代谢物	Nucleotide And Its metabolites	核苷酸及其代谢物	328	329.053	[M-H]-	C10H12N5O6P	2.59874e+07	3.79349e+07	6.90553e+07	4.18839e+07	4.66256e+07	5.48509e+07	3.39393e+06	1.33422e+07	1.70025e+07	5.3616e+06	7.13471e+06	2.76772e+06	2.96219e+07	4.25666e+06	3.38732e+07	2.82631e+07	251884	4.23725e+07	1.64359e+07	1.872e+07	4.84141e+07	8.1608e+07	1.75774e+07	2.0171e+07	2.2149e+07	2.2152e+07	2.24837e+07	2.23528e+07	2.21936e+07	2.23542e+07	C00575	HMDB0000058	6076	60-92-4	17489	5120	ko00230,ko01100,ko01522,ko04010,ko04014,ko04015,ko04020,ko04022,ko04024,ko04062,ko04072,ko04114,ko04211,ko04213,ko04261,ko04270,ko04340,ko04361,ko04371,ko04540,ko04611,ko04670,ko04710,ko04713,ko04714,ko04720,ko04723,ko04724,ko04725,ko04726,ko04727,ko04728,ko04740,ko04742,ko04750,ko04910,ko04911,ko04912,ko04913,ko04914,ko04915,ko04916,ko04918,ko04919,ko04921,ko04922,ko04923,ko04924,ko04925,ko04926…
MEDN1529	Cytidine 5'-monophosphate-N-acetylneuraminic acid（CMP-NANA）	CMP-唾液酸单钠盐	Nucleotide And Its metabolites	核苷酸及其代谢物	Nucleotide And Its metabolites	核苷酸及其代谢物	613.1	614.147	[M-H]-	C20H31N4O16P	156046	584771	125646	181028	459634	285167	7.03203e+06	1.1062e+07	8.79977e+06	1.44729e+07	1.30816e+07	5.18948e+06	1.01013e+07	2.97988e+06	4.81867e+06	8.52032e+06	6.07406e+06	5.93081e+06	4.4342e+06	6.24204e+06	2.38591e+07	5.48531e+07	9.88871e+06	6.4781e+06	2.88658e+06	3.19053e+06	2.89571e+06	2.97334e+06	2.93812e+06	2.94051e+06	C00128	-	18292	3063-71-6	-	-	ko00520,ko01100,ko01250
MEDN1612	Cytidine 2',3'-cyclic monophosphoric acid	胞苷2'，3'-环一磷酸	Nucleotide And Its metabolites	核苷酸及其代谢物	Nucleotide And Its metabolites	核苷酸及其代谢物	304	305.041	[M-H]-	C9H12N3O7P	44094.1	52489.9	117650	85475.2	38842.5	100807	35043.8	26407.1	42473.4	14435.6	17852.3	31576.9	31542.9	27513.8	34611.1	25729.3	16264	30757.7	2.88667	2.88667	2.88667	2.88667	2.88667	2.88667	38362.7	39538.6	38334.6	40100.7	40007.3	35676.2	C02354	HMDB0011691	91746159	633-90-9	-	-	ko00240,ko01100
MEDP0165	Cytosine	胞嘧啶	Nucleotide And Its metabolites	核苷酸及其代谢物	Nucleotide And Its metabolites	核苷酸及其代谢物	112	111.043	[M+H]+	C4H5N3O	283384	775015	138647	464577	277271	131082	972678	1.1009e+06	1.37631e+06	1.3965e+06	1.08208e+06	449055	596864	292928	403632	341052	436605	684847	291384	610719	1.59165e+06	1.50361e+06	954178	556150	554135	579053	578589	559809	606776	560243	C00380	HMDB0000630	597	71-30-7	16040	283	ko00240,ko01100,ko01232
MEDN0602	Deoxyguanosine 5'-monophosphate(dGMP)	2-'脱氧鸟苷5'-一磷酸(dGMP)	Nucleotide And Its metabolites	核苷酸及其代谢物	Nucleotide And Its metabolites	核苷酸及其代谢物	346.1	347.063	[M-H]-	C10H14N5O7P	2.65946e+07	3.62144e+07	4.6051e+07	4.76434e+07	2.22442e+07	5.38102e+07	8.20791	8.20791	8.20791	8.20791	8.20791	8.20791	2.36904e+07	7.2723e+07	7.14893e+07	5.27296e+07	4.12119e+07	7.30484e+07	73556	51128.5	9.6114	9.6114	113571	77391.5	2.17947e+07	2.1795e+07	2.20435e+07	2.18331e+07	2.19493e+07	2.19492e+07	C00362	HMDB0001044	65059	902-04-5	16192	-	ko00230,ko01100,ko01232
MEDN0534	Deoxyguanosine diphosphate(dGDP)	脱氧鸟苷二磷酸(dGDP)	Nucleotide And Its metabolites	核苷酸及其代谢物	Nucleotide And Its metabolites	核苷酸及其代谢物	426	427.029	[M-H]-	C10H15N5O10P2	4.56548e+06	7.10942e+06	8.48837e+06	9.39599e+06	4.8566e+06	9.83942e+06	7297.54	12174.6	5984.28	9221.48	11334.9	4865.84	6.81461e+06	1.93789e+07	8.90592e+06	1.4502e+07	1.09149e+07	1.22965e+07	31886	19833.9	48592.3	242629	14785.2	12435.5	4.39637e+06	4.43073e+06	4.42347e+06	4.45447e+06	4.4574e+06	4.36612e+06	C00361	HMDB0000960	439220	3493-09-2	28862	5906	ko00230,ko01100,ko01232
MEDN0573	GDP-L-fucose	GDP-L-岩藻糖	Nucleotide And Its metabolites	核苷酸及其代谢物	Nucleotide And Its metabolites	核苷酸及其代谢物	588.1	589.082	[M-H]-	C16H25N5O15P2	2.41968e+07	3.03923e+07	2.46454e+07	2.86582e+07	2.26628e+07	2.90612e+07	11179.9	2434.75	2029.77	3444.74	6.27247	2297.3	3.35314e+07	2.29482e+07	1.70738e+07	2.06151e+07	2.58814e+07	2.26047e+07	14626.3	3546.03	15899.6	6005.3	9405.87	4808.2	1.4549e+07	1.47285e+07	1.4551e+07	1.45505e+07	1.47268e+07	1.46888e+07	C00325	HMDB0001095	6001	15839-70-0	17009	6001	ko00051,ko00520,ko01100,ko01250
MEDP1276	Guanine	鸟嘌呤	Nucleotide And Its metabolites	核苷酸及其代谢物	Nucleotide And Its metabolites	核苷酸及其代谢物	152.1	151.049	[M+H]+	C5H5N5O	411378	1.63795e+06	1.50118e+06	747641	368640	1.35348e+06	296180	504910	710450	246402	389653	286510	393955	902956	794493	810361	565766	919341	326232	544592	716852	914860	1.15903e+06	924605	1.06265e+06	1.06261e+06	1.0713e+06	1.07984e+06	1.05171e+06	1.05127e+06	C00242	HMDB0000132	764	73-40-5	16235	315	ko00230,ko01100,ko01232
MEDP0167	Guanosine	鸟苷	Nucleotide And Its metabolites	核苷酸及其代谢物	Nucleotide And Its metabolites	核苷酸及其代谢物	284.1	283.092	[M+H]+	C10H13N5O5	348041	5.864e+06	7.24621e+06	6.21554e+06	1.62421e+06	4.8823e+06	425373	873319	1.05334e+06	345274	664787	311767	3.33312e+06	4.51764e+06	420092	7.47814e+06	2.75205e+06	1.58521e+06	106522	267640	602332	1.34774e+06	513266	520718	3.70265e+06	3.70192e+06	3.75872e+06	3.72875e+06	3.7039e+06	3.72876e+06	C00387	HMDB0000133	6802	118-00-3	16750	87	ko00230,ko01100,ko01232,ko02010
MEDN0161	Guanosine 3',5'-Cyclic Monophosphate	鸟苷 3',5'-环一磷酸	Nucleotide And Its metabolites	核苷酸及其代谢物	Nucleotide And Its metabolites	核苷酸及其代谢物	344	345.047	[M-H]-	C10H12N5O7P	359774	279311	72045.9	64898.2	93093.7	101858	2.82951	2.82951	2.82951	2.82951	2.82951	2.82951	52943.7	115617	19619.3	157713	125052	25352	22577	7.43234	13097	8970.61	16821.6	12864.6	73425.6	72909.9	72334.2	72467.1	72473.7	73323.2	C00942	HMDB0001314	24316	7665-99-8	16356	6152	ko00230,ko01100,ko04022,ko04270,ko04540,ko04611,ko04713,ko04714,ko04730,ko04740,ko04744,ko04921,ko04923,ko04924,ko04925,ko04970,ko04976
MEDN1544	Guanosine-5'-diphosphate	二磷酸鸟苷	Nucleotide And Its metabolites	核苷酸及其代谢物	Nucleotide And Its metabolites	核苷酸及其代谢物	442	443.024	[M-H]-	C10H15N5O11P2	762840	1.14725e+06	806067	927177	565479	935380	9.54393	9.54393	9.54393	9.54393	9.54393	9.54393	872239	1.05381e+06	534056	600848	1.04903e+06	1.14392e+06	11433.3	7713.83	3090.25	16761.7	8.75055	5119.24	453998	426166	454720	437477	437070	462571	C00035	HMDB0001201	135398619	146-91-8	17552	6077	ko00230,ko01100,ko01232,ko04014,ko04015,ko04140,ko04144
MEDN1545	Guanosine-5'-monophosphate	鸟苷5'-单磷酸	Nucleotide And Its metabolites	核苷酸及其代谢物	Nucleotide And Its metabolites	核苷酸及其代谢物	362	363.058	[M-H]-	C10H14N5O8P	3.44446e+06	3.23969e+06	2.52547e+06	1.52111e+06	921571	3.27485e+06	8.06273	8.06273	8.06273	8.06273	8.06273	8.06273	1.19094e+06	2.28943e+06	5.97109e+06	792921	1.12303e+06	5.34804	5.34804	53122	69755	203952	5.34804	41643	1.48944e+06	1.51092e+06	1.49015e+06	1.49996e+06	1.49996e+06	1.50383e+06	C00144	HMDB0001397	135398631	85-32-5	17345	6216	ko00230,ko01100,ko01232,ko01523,ko04022,ko04740,ko04742,ko04744
MEDN1003	Inosine	肌苷	Nucleotide And Its metabolites	核苷酸及其代谢物	Nucleotide And Its metabolites	核苷酸及其代谢物	267.1	268.081	[M-H]-	C10H12N4O5	2.97483e+06	2.60843e+07	3.84049e+07	4.22957e+07	1.42189e+07	2.98676e+07	721965	1.36463e+06	1.56125e+06	1.00544e+06	1.98692e+06	745935	2.30661e+07	2.86442e+07	5.5749e+06	3.59466e+07	3.85922e+07	1.2784e+07	129742	199995	200018	177546	266227	242011	1.94148e+07	1.95424e+07	1.95413e+07	1.91229e+07	1.96067e+07	1.96011e+07	C00294	HMDB0000195	135398641	58-63-9	17596	84	ko00230,ko01100,ko01232,ko02010
MEDN2061	Inosine 5'-triphosphate	肌苷 5'-三磷酸	Nucleotide And Its metabolites	核苷酸及其代谢物	Nucleotide And Its metabolites	核苷酸及其代谢物	507	507.98	[M-H]-	C10H15N4O14P3	9345.86	21812.3	12186.9	48582.3	19276.5	24654.4	465263	320810	241429	228304	329521	444287	57819.6	159709	108219	224659	77594.3	101100	687613	801311	577134	846498	1.00367e+06	410688	110141	110145	108488	112387	112100	85374.5	C00081	-	135398643	132-06-9	-	-	ko00230,ko01100,ko01232
MEDP1501	Isocytosine	异胞嘧啶	Nucleotide And Its metabolites	核苷酸及其代谢物	Nucleotide And Its metabolites	核苷酸及其代谢物	112	111.043	[M+H]+	C4H5N3O	580997	1.87825e+06	1.78007e+06	643372	281813	760758	691737	641776	801895	967714	732956	346890	822766	589105	497505	721106	819448	769566	701158	1.59537e+06	1.95482e+06	1.27327e+06	1.58614e+06	1.10554e+06	1.09408e+06	1.09342e+06	997690	1.05837e+06	1.05611e+06	1.1019e+06	-	-	66950	108-53-2	-	-	-
MEDP1787	N4-Acetylcytidine	N4-乙酰基胞苷	Nucleotide And Its metabolites	核苷酸及其代谢物	Nucleotide And Its metabolites	核苷酸及其代谢物	286.1	285.096	[M+H]+	C11H15N3O6	40395.4	277683	298317	198342	86727.6	329097	104811	92763.1	117845	80050.3	90495.3	38207.7	83003.1	107312	113659	169414	47591.3	83428.1	151441	242153	238827	167663	217225	257644	179304	185768	185748	185941	182677	182652	C22293	HMDB0005923	107461	3768-18-1	70989	-	-
MEDP1954	N6-(2-Hydroxyethyl)adenosine	N6-(2-羟乙基)腺苷	Nucleotide And Its metabolites	核苷酸及其代谢物	Nucleotide And Its metabolites	核苷酸及其代谢物	312.1	311.123	[M+H]+	C12H17N5O5	3.2e+06	2.35031e+06	7.20438e+06	8.26815e+06	2.55084e+06	8.25123e+06	106445	68728.8	79937.2	45606.8	45251.7	78489.4	6.26505e+06	1.25585e+07	8.58719e+06	7.87637e+06	6.82295e+06	8.46854e+06	2.6548e+06	1.95409e+06	2.29288e+06	368375	3.13111e+06	333100	2.35315e+06	2.32197e+06	2.35314e+06	2.35426e+06	2.34099e+06	2.35428e+06	-	-	96124	4338-48-1	-	-	-
MEDP1991	N6-Isopentenyladenosine	N6-异戊烯基腺苷	Nucleotide And Its metabolites	核苷酸及其代谢物	Nucleotide And Its metabolites	核苷酸及其代谢物	336.2	335.159	[M+H]+	C15H21N5O4	95368.2	218572	244095	312138	31239.2	376181	10587.6	12472.8	14134.4	7125.61	5170.33	8078.52	70582	848243	274036	184847	88089.9	242459	17612.1	18386.6	18288.3	39507	36926.3	25605.4	94183.3	92372.6	93721	92912.8	94021.5	92950.9	D05726	-	24405	7724-76-7	-	-	-
MEDP0378	N6-Succinyl Adenosine	N6-琥珀酰腺苷	Nucleotide And Its metabolites	核苷酸及其代谢物	Nucleotide And Its metabolites	核苷酸及其代谢物	384	383.108	[M+H]+	C14H17N5O8	6.92261e+06	9.08822e+06	8.01987e+06	5.55271e+06	9.51108e+06	7.15212e+06	5.61132e+06	4.16105e+06	2.95566e+06	3.52349e+06	3.15268e+06	5.11063e+06	3.73276e+06	4.65297e+06	5.19755e+06	7.41231e+06	5.91751e+06	3.52738e+06	1.37827e+07	1.44834e+07	1.89673e+07	8.62255e+06	1.54176e+07	1.94111e+07	5.27383e+06	5.29114e+06	5.27381e+06	5.27153e+06	5.2608e+06	5.30288e+06	-	HMDB0000912	20849086	4542-23-8	71169	5867	-
MEDP1493	N6-methyladenosine	N6-甲基腺苷	Nucleotide And Its metabolites	核苷酸及其代谢物	Nucleotide And Its metabolites	核苷酸及其代谢物	282	281.112	[M+H]+	C11H15N5O4	93336.8	310446	382136	378027	46265.7	429662	34429	32365.1	23008.9	23106.1	34913.6	30252.8	52038.7	503372	170358	130297	64246.7	266999	57024.2	47359.5	57035	53286.2	62770.6	56548.7	216740	218279	216740	216443	218531	218587	-	HMDB0004044	102175	1867-73-8	21891	-	-
MEDP1791	Nicotinamide riboside chloride	烟酰胺核苷	Nucleotide And Its metabolites	核苷酸及其代谢物	Nucleotide And Its metabolites	核苷酸及其代谢物	255.1	290.067	[M-Cl]+	C11H15ClN2O5	223277	279189	264107	222799	131154	167459	791420	1.76857e+06	487074	1.23375e+06	913412	4.60026e+06	228650	170030	129367	385473	394520	76926.6	2.68278e+06	2.69552e+06	2.262e+06	3.30748e+06	1.97228e+06	2.93318e+06	545236	531777	545306	532506	544688	540507	-	HMDB0000855	90480033	23111-00-4	15927	5818	-
MEDP1083	Oxypurinol	奥昔嘌醇	Nucleotide And Its metabolites	核苷酸及其代谢物	Nucleotide And Its metabolites	核苷酸及其代谢物	153	152.033	[M+H]+	C5H4N4O2	10625.9	91733.6	130155	91998.4	39378.3	72885	6861.44	17574.4	22508.5	5194.12	15021.5	4060.45	2.4239	2.4239	2.4239	2.4239	2.4239	2.4239	3782.23	11196.6	15846.4	22513.8	15729	17360.5	61176.4	60604.7	60661.8	61265.7	60778.8	60778.5	C07599	HMDB0000786	135398752	2465-59-0	28315	5752	-
MEDP0881	Phosphocholine	磷酸胆碱	Nucleotide And Its metabolites	核苷酸及其代谢物	Nucleotide And Its metabolites	核苷酸及其代谢物	185.1	184.074	[M+H]+	C5H15NO4P	2.30955e+07	3.50255e+06	6.64527e+06	2.47711e+07	2.42799e+07	1.10729e+07	2.023e+07	2.23423e+07	1.47272e+07	2.32462e+07	2.24104e+07	2.30164e+07	1.54684e+07	1.71939e+07	1.66308e+07	1.76788e+07	1.88431e+07	1.65539e+07	1.59734e+07	1.71582e+07	1.78872e+07	1.96015e+07	2.26015e+07	1.57444e+07	1.35039e+07	1.38893e+07	1.34954e+07	1.14781e+07	1.40291e+07	1.42345e+07	C00588	HMDB0001565	1014	107-73-3	18132	6326	ko00552,ko00564,ko01100,ko05231
MEDP0174	Purine	嘌呤碱	Nucleotide And Its metabolites	核苷酸及其代谢物	Nucleotide And Its metabolites	核苷酸及其代谢物	121	120.044	[M+H]+	C5H4N4	807474	911368	1.06728e+06	816681	844153	828726	1.01154e+06	887780	1.04278e+06	986547	940393	959964	584399	710672	659487	636722	619832	796351	570207	621893	659122	684986	653422	493124	1.65032e+06	1.66113e+06	1.66567e+06	1.66123e+06	1.65533e+06	1.65528e+06	C15587	HMDB0001366	1044	120-73-0	17258	6193	-
MEDP1961	Ribosyladenosine	核糖腺苷	Nucleotide And Its metabolites	核苷酸及其代谢物	Nucleotide And Its metabolites	核苷酸及其代谢物	400.1	399.139	[M+H]+	C15H21N5O8	242405	236501	259592	271558	115866	358836	74742.9	181884	121704	135941	192982	142944	160345	458588	408300	491892	332690	276768	285119	350982	345784	296829	292697	325165	199767	199393	201719	191193	205070	205183	-	-	69726184	-	-	-	-
MEDN1586	Thymidine-5'-phosphate (dTMP)	脱氧胸苷酸	Nucleotide And Its metabolites	核苷酸及其代谢物	Nucleotide And Its metabolites	核苷酸及其代谢物	321.1	322.057	[M-H]-	C10H15N2O8P	4956.18	10532.1	1632.6	4283.44	0.456535	15078.9	0.456535	0.456535	0.456535	0.456535	0.456535	0.456535	0.165068	8338.27	17671.5	49.6511	76.6587	26038.8	0.165068	0.165068	0.165068	0.165068	0.165068	0.165068	3467.31	3412.93	3470.16	3354.71	3478.04	3481.3	C00364	HMDB0001227	9700	365-07-1	17013	6092	ko00240,ko01100,ko01232,ko01523
MEDP0178	Uracil	尿嘧啶	Nucleotide And Its metabolites	核苷酸及其代谢物	Nucleotide And Its metabolites	核苷酸及其代谢物	113	112.027	[M+H]+	C4H4N2O2	765378	2.82341e+06	4.44259e+06	3.40577e+06	1.09302e+06	2.2832e+06	517490	1.07907e+06	1.82136e+06	571709	1.15253e+06	382012	2.1065e+06	2.02241e+06	468607	1.93921e+06	2.63794e+06	588652	266197	575324	1.04263e+06	1.50219e+06	544782	536807	2.62412e+06	2.63794e+06	2.66071e+06	2.63029e+06	2.63018e+06	2.65578e+06	C00106	HMDB0000300	1174	66-22-8	17568	258	ko00240,ko00410,ko00770,ko01100,ko01232
MEDN1591	Uracil 5-carboxylic acid	尿嘧啶5-羧酸	Nucleotide And Its metabolites	核苷酸及其代谢物	Nucleotide And Its metabolites	核苷酸及其代谢物	155	156.017	[M-H]-	C5H4N2O4	117039	106147	214211	129233	71957.7	109772	238935	418560	724890	382539	452317	219197	114771	89851.6	164147	70166.1	101995	87702	661594	598254	993956	404073	981581	958821	319187	323767	318987	318887	329665	318728	C03030	-	90301	23945-44-0	-	-	-
MEDN0171	Uridine	尿嘧啶核苷	Nucleotide And Its metabolites	核苷酸及其代谢物	Nucleotide And Its metabolites	核苷酸及其代谢物	243.1	244.07	[M-H]-	C9H12N2O6	183821	807032	1.55505e+06	1.25707e+06	296609	800499	118698	230900	355176	111604	250014	87073.7	681559	480606	90082.7	504543	716382	168298	58591.1	83042.5	208406	279590	108498	109073	642587	652564	655575	604711	658644	658604	C00299	HMDB0000296	6029	58-96-8	16704	90	ko00240,ko01100,ko01232,ko02010
MEDN0419	Uridine 5-Monophosphate	5-尿嘧啶核苷酸	Nucleotide And Its metabolites	核苷酸及其代谢物	Nucleotide And Its metabolites	核苷酸及其代谢物	323	324.036	[M-H]-	C9H13N2O9P	5.97845e+06	6.77762e+06	2.95491e+06	3.79549e+06	2.19436e+06	9.50839e+06	131874	114057	265947	103271	207835	67712.5	849044	3.5143e+06	1.76063e+07	676790	1.3925e+06	1.34422e+07	25170.4	22344.8	62946.7	222137	35749.7	32002.5	3.56108e+06	3.56871e+06	3.58327e+06	3.58831e+06	3.53398e+06	3.58877e+06	C00105	HMDB0000288	6030	58-97-9	16695	-	ko00240,ko01100,ko01232,ko01240
MEDN0170	Uridine 5’-Diphosphate	尿苷5'-二磷酸	Nucleotide And Its metabolites	核苷酸及其代谢物	Nucleotide And Its metabolites	核苷酸及其代谢物	403	404.002	[M-H]-	C9H14N2O12P2	1.25762e+07	9.36807e+06	9.5895e+06	7.24717e+06	6.12047e+06	8.02585e+06	3.4729	3.4729	3.4729	3.4729	3.4729	3.4729	7.9623e+06	1.67673e+07	1.90362e+07	8.43776e+06	8.34016e+06	8.58733e+06	100315	63843.7	12.9949	62018.5	19747.8	33717.4	4.3024e+06	4.34721e+06	4.34619e+06	4.3288e+06	4.31075e+06	4.34077e+06	C00015	HMDB0000295	6031	58-98-0	17659	-	ko00240,ko01100,ko01232,ko01240,ko04080
MEDN1117	Uridine-5'-diphospho-N-acetylgalactosamine disodium salt	尿苷二磷酸-N-乙酰氨基葡萄糖(UDP-GlcNAc )	Nucleotide And Its metabolites	核苷酸及其代谢物	Nucleotide And Its metabolites	核苷酸及其代谢物	606.1	607.082	[M-H]-	C17H27N3O17P2	3.26443e+07	2.91655e+07	31075338	1.88257e+07	1.21495e+07	3.01534e+07	3767.45	6391.75	11486.6	1493	2014.13	2673.17	1.9883e+07	3.76708e+07	4.48675e+07	1.61361e+07	2.48448e+07	5.00573e+07	10878	5432.94	16510.6	9.70995	12256.5	9.71246	1.51605e+07	1.55252e+07	1.51557e+07	1.52752e+07	1.52766e+07	1.55338e+07	C00043	HMDB0000290	445675	528-04-1	16264	5281	ko00520,ko00524,ko00552,ko01100,ko01250,ko04931,ko05415
MEDN0533	Xanthosine	黄苷	Nucleotide And Its metabolites	核苷酸及其代谢物	Nucleotide And Its metabolites	核苷酸及其代谢物	283.1	284.076	[M-H]-	C10H12N4O6	259211	1.53129e+06	4.39211e+06	1.15199e+06	140225	753661	20949.8	16891.3	28279.4	21223.4	18514.9	7182.64	531335	968708	477850	788029	748846	559141	18381.5	13436.6	17800.4	31721.7	22058.2	30436.6	677089	676839	692297	682641	679972	682642	C01762	HMDB0000299	64959	146-80-5	18107	3408	ko00230,ko00232,ko01100,ko01232,ko02010
MEDP0383	Β-Pseudouridine	假尿苷	Nucleotide And Its metabolites	核苷酸及其代谢物	Nucleotide And Its metabolites	核苷酸及其代谢物	245	244.07	[M+H]+	C9H12N2O6	206303	153239	287805	754121	748174	356377	664553	719909	726806	722134	818764	625668	510508	672323	658570	778865	733168	598049	561638	578118	796470	728023	951564	607324	486130	490431	454584	452327	530690	462642	C02067	HMDB0000767	15047	1445-07-4	17802	5734	ko00240,ko01100
MEDN0279	2-Aminoethanesulfinic Acid	2-氨基乙烷亚磺酸	Organic acid And Its derivatives	有机酸及其衍生物	Sulfonic acids	磺酸类化合物	108	109.02	[M-H]-	C2H7NO2S	13091.4	26401.3	42398.6	24798.7	4093.05	75221.2	86744.3	48277.4	199001	31910.1	67075.9	65466.8	60722.7	104903	112054	133042	65936.9	229698	1922.6	4657.83	39512.6	68104.2	4020.22	5243.74	86806.1	85711.2	86827.8	84061.4	94177.9	83607.1	C00519	HMDB0000965	107812	300-84-5	16668	281	ko00430,ko01100
MEDN1554	Isethionic acid	乙磺酸	Organic acid And Its derivatives	有机酸及其衍生物	Sulfonic acids	磺酸类化合物	125	125.999	[M-H]-	C2H6O4S	640974	2.69304e+06	3.73289e+06	2.9941e+06	1.05196e+06	1.20418e+06	356220	867224	385451	1.97381e+06	981012	2.69001e+06	1.7513e+06	3.34384e+06	2.65432e+06	3.34383e+06	2.89039e+06	2.37408e+06	454536	1.06659e+06	782334	975790	611753	564501	1.78319e+06	1.78839e+06	1.84321e+06	1.77335e+06	1.84527e+06	1.84041e+06	C05123	HMDB0003903	7866	1562-00-1	1157	6987	ko00430,ko01100
MEDN0741	Methanesulfonic acid	甲磺酸	Organic acid And Its derivatives	有机酸及其衍生物	Sulfonic acids	磺酸类化合物	95	95.9881	[M-H]-	CH4O3S	3.90303e+06	3.47567e+06	5.49137e+06	4.38114e+06	4.46363e+06	4.76449e+06	5.56821e+06	6.18985e+06	5.43474e+06	5.25484e+06	6.10495e+06	5.09448e+06	6.27916e+06	5.70751e+06	5.68819e+06	5.7365e+06	4.14971e+06	5.95913e+06	5.37072e+06	5.85589e+06	5.52906e+06	5.85646e+06	4.70662e+06	4.7195e+06	4.42947e+06	4.54725e+06	4.48597e+06	4.58267e+06	4.42305e+06	4.41141e+06	C11145	-	6395	75-75-2	-	-	ko00920,ko01100
MEDP1272	20,26-dihydroxyecdysone	20,26-二羟基蜕皮激素	Hormones and hormone related compounds	激素及激素相关物质	Hormones and hormone related compounds	激素及激素相关物质	497.3	496.304	[M+H]+	C27H44O8	4.85063e+06	3.88295e+06	2.00881e+06	1.27627e+06	1.18534e+06	717682	1.08516e+07	1.13753e+07	5.78088e+06	1.03249e+07	1.21363e+07	1.242e+07	379512	663133	665501	1.07346e+06	1.29285e+06	304705	524118	590155	695804	217943	1.51103e+06	1.32606e+06	8.18427e+06	8.18638e+06	8.2907e+06	8.0596e+06	8.27756e+06	8.2769e+06	C16500	-	47205796	19458-46-9	-	-	ko00981
MEDN0611	6β-hydroxytestosterone	6-β-羟基睾酮	Hormones and hormone related compounds	激素及激素相关物质	Hormones and hormone related compounds	激素及激素相关物质	303.2	304.204	[M-H]-	C19H28O3	12805.6	14935.6	11900.7	15658.3	12427.3	18026.8	16571.2	27643.6	16676.7	11302	19100.4	17037.8	14375.9	14456.6	16157.7	13885	13066.7	12838.9	16749.6	14124.4	15301.6	13768.3	15066.3	13108.4	16971.5	17392.7	17004.4	17205.1	16115.5	17796.3	C14497	HMDB0006259	65543	62-99-7	34477	-	-
MEDN0824	7-ketodeoxycholic acid	7-酮基-3α,12α-二羟基胆烷酸	Hormones and hormone related compounds	激素及激素相关物质	Hormones and hormone related compounds	激素及激素相关物质	405.3	406.272	[M-H]-	C24H38O5	8313.66	1667.94	1323.82	6995.27	6.36492	6.36492	16238.6	10804.6	36075.2	2684.25	3991.15	12939.9	4615.56	3815.77	752.292	2746.52	297.153	2100.94	5388.56	1169.13	1756.99	4013.02	5082.02	1978.06	13436.8	13644.3	13433.3	13739.5	13732.8	13213	C04643	HMDB0000391	188292	911-40-0	16390	5380	-
MEDP2059	Androstenediol	雄烯二醇	Hormones and hormone related compounds	激素及激素相关物质	Hormones and hormone related compounds	激素及激素相关物质	291.231	290.225	[M+H]+	C19H30O2	2.68954e+06	2.8418e+06	2.8835e+06	2.69102e+06	2.7193e+06	2.80295e+06	3.04124e+06	3.01389e+06	3.04404e+06	2.93848e+06	3.00475e+06	2.97685e+06	3.61862e+06	3.51922e+06	3.7104e+06	3.69321e+06	3.11929e+06	3.56995e+06	3.20999e+06	3.63339e+06	3.61022e+06	3.54988e+06	3.56024e+06	3.0525e+06	2.81042e+06	2.84689e+06	2.8104e+06	2.80198e+06	2.83098e+06	2.83093e+06	C04295	HMDB0003818	10634	521-17-5	2710	6983	ko00140,ko04913
MEDN1613	Cytochalasin H	细胞松弛素H	Hormones and hormone related compounds	激素及激素相关物质	Hormones and hormone related compounds	激素及激素相关物质	474.3	493.283	[M-H2O-H]-	C30H39NO5	305279	180675	351280	431310	210987	222435	525509	177315	351891	229566	227107	611722	199152	489926	345552	294728	259481	416195	448490	1.04446e+06	452861	340196	254980	227193	302358	268189	297424	292140	292043	274023	-	-	6434468	53760-19-3	-	-	-
MEDP1477	L-Phenylephrine	L-去氧肾上腺素	Hormones and hormone related compounds	激素及激素相关物质	Hormones and hormone related compounds	激素及激素相关物质	168	167.095	[M+H]+	C9H13NO2	150482	159079	169298	277409	147943	178827	280790	354707	354840	237042	311056	263953	212728	150272	225188	250685	218939	164695	218928	394574	135314	244706	247041	373236	269167	270244	258680	263374	263341	271968	C07441	HMDB0002182	6041	59-42-7	8093	699	-
MEDP2265	2-Amino-3-phosphonopropionic acid	2-氨基-3-磷酸丙酸	Organic acid And Its derivatives	有机酸及其衍生物	Phosphoric acids	磷酸类化合物	170	169.014	[M+H]+	C3H8NO5P	736441	4.33845e+06	6.84314e+06	3.99114e+06	107597	3.31795e+06	2.02839e+06	2.09584e+06	1.67243e+06	1.36625e+06	616522	1.98118e+06	7.38259e+06	9.93719e+06	7.26155e+06	3.33791e+06	1.43144e+06	1.11575e+07	9.91571	9.91571	9.91571	9.91571	9.91571	9.91571	2.23226e+06	2.2612e+06	2.26113e+06	2.25626e+06	2.22982e+06	2.25637e+06	C05672	HMDB0000370	3857	5652-28-8	244030	5359	ko00440,ko01100
MEDN1239	5-O-(1-carboxyvinyl)-3-phosphate	5-O-(1-羧基乙烯基)-3-磷酸酯	Organic acid And Its derivatives	有机酸及其衍生物	Phosphoric acids	磷酸类化合物	323	324.025	[M-H]-	C10H13O10P	1.87165e+07	2.01429e+07	8.7877e+06	1.35294e+07	6.27348e+06	3.62012e+07	222055	265630	265011	378394	340424	79178.9	1.55183e+06	9.03193e+06	3.56083e+07	1.23018e+06	2.77691e+06	7.53459e+07	2.9101	2.9101	2.9101	2.9101	2.9101	2.9101	7.51453e+06	7.5776e+06	7.58845e+06	7.50395e+06	7.69121e+06	7.5001e+06	C01269	-	439463	89771-75-5	-	-	ko00400,ko01100,ko01230
MEDN1638	Glycerol 3-Phosphate	甘油磷酸	Organic acid And Its derivatives	有机酸及其衍生物	Phosphoric acids	磷酸类化合物	343	172.014	[2M-H]-	C3H9O6P	91530.1	61176	82473.6	47337.7	37773.6	64896.1	5322.83	7446.04	14922.9	9046.9	10642.5	9586.9	43467	53983.5	47366.3	43348.2	27551.9	51708.3	11.018	11.018	11.018	11.018	11.018	11.018	29659.5	32278.6	31655	30883.6	30849.6	32319.9	C03189	HMDB0000126	754	57-03-4	15978	5161	-
MEDP2266	Inositol 1,3,4-trisphosphate	肌醇 1,3,4-三磷酸	Organic acid And Its derivatives	有机酸及其衍生物	Phosphoric acids	磷酸类化合物	421	419.962	[M+H]+	C6H15O15P3	1.14383e+06	1.10662e+06	1.13248e+06	1.1158e+06	1.15719e+06	1.15134e+06	1.21119e+06	1.25824e+06	1.32191e+06	1.24499e+06	1.21419e+06	1.22124e+06	1.07785e+06	1.24065e+06	1.22112e+06	1.21846e+06	1.28473e+06	1.31211e+06	1.13974e+06	1.24071e+06	1.2124e+06	1.19358e+06	1.17861e+06	1.20187e+06	1.13029e+06	1.16089e+06	1.16118e+06	1.14999e+06	1.14619e+06	1.1462e+06	C01243	HMDB0001143	439455	98102-63-7	18228	6035	ko00562,ko01100,ko04070
MEDN1005	Phosphoenolpyruvate	磷酸烯醇丙酮酸	Organic acid And Its derivatives	有机酸及其衍生物	Phosphoric acids	磷酸类化合物	167	167.982	[M-H]-	C3H5O6P	4.89919e+06	4.56031e+06	4.6262e+06	9.39309e+06	8.90736e+06	6.66628e+06	4.12439e+06	3.80214e+06	3.78203e+06	3.49611e+06	3.72047e+06	4.24126e+06	1.10339e+07	6.55912e+06	5.87396e+06	6.92948e+06	6.80518e+06	4.95524e+06	1.78674e+07	1.44564e+07	1.42659e+07	6.72081e+06	1.97658e+07	2.89638e+07	5.2836e+06	5.2836e+06	5.30056e+06	5.32519e+06	5.16667e+06	5.32313e+06	C00074	HMDB0000263	1005	138-08-9	-	-	ko00010,ko00020,ko00400,ko00440,ko00620,ko01100,ko01200,ko01230,ko01240,ko04922,ko04964,ko05230
MEDN0461	D-Sedoheptuiose 7-Phosphate	D-景天庚酮糖 7-磷酸	Carbohydrates and Its metabolites	碳水化合物及其代谢物	Phosphate sugars	磷酸糖	289	290.04	[M-H]-	C7H15O10P	112998	187660	180455	125844	10.4692	146056	114089	201555	95952.6	168020	147138	95947	104241	45292.4	79872.3	32320.6	67246.1	26375.6	57475.3	54394.1	50624.3	100800	75344	51297.1	102418	107344	107242	108326	107771	103139	C05382	HMDB0001068	22833559	2646-35-7	15721	-	ko00030,ko01100,ko01200,ko01230,ko01250
MEDN0506	N-Acetylglucosamine 1-Phosphate	N-乙酰葡萄糖胺 1-磷酸	Carbohydrates and Its metabolites	碳水化合物及其代谢物	Phosphate sugars	磷酸糖	300	301.056	[M-H]-	C8H16NO9P	1.40621e+07	1.27828e+07	2.7106e+07	1.48728e+07	2.01669e+07	7.60544e+06	35584042	4.97499e+07	4.70223e+07	4.47042e+07	5.20838e+07	3.46157e+07	1.93133e+07	3.70934e+06	2.70092e+06	8.12347e+06	2.92452e+07	3.2784e+06	2.72923e+07	4.977e+07	6.85604e+07	8.58769e+07	3.27875e+07	1.87303e+07	1.55148e+07	1.5813e+07	1.58144e+07	1.60851e+07	1.52255e+07	1.60875e+07	C04256	HMDB0001367	440272	6866-69-9	7125	6194	-
MEDN1576	Sucrose 6′-monophosphate	蔗糖6'-单磷酸	Carbohydrates and Its metabolites	碳水化合物及其代谢物	Phosphate sugars	磷酸糖	421.1	422.083	[M-H]-	C12H23O14P	5.11517e+06	2.58435e+07	3.58107e+07	1.93508e+07	6.47312e+06	2.64425e+07	1.49343e+07	2.17411e+07	1.65532e+07	9.74285e+06	1.57695e+07	1.86669e+07	3.53673e+06	1.35714e+07	5.85379e+06	1.06192e+07	9.70443e+06	1.02547e+07	3.90909e+07	4.87374e+07	4.3878e+07	149281322	8.47136e+07	4.74257e+07	1.17485e+07	1.19043e+07	1.18976e+07	11980268	1.16386e+07	1.19938e+07	-	-	439762	36064-19-4	-	-	-
MEDN0352	O-Phosphorylethanolamine	O-Phosphorylethanolamine	GP	甘油磷脂类	PE	磷脂酰乙醇胺	140	141.019	[M-H]-	C2H8NO4P	3.05934e+06	2.66292e+06	3.87923e+06	4.66515e+06	3.20716e+06	3.64803e+06	5.15481e+06	3.1572e+06	7.72646e+06	4.77678e+06	7.39478e+06	6.81469e+06	3.40468e+06	4.37009e+06	3.61101e+06	3.72058e+06	2.2104e+06	3.30936e+06	5.73808e+06	2.50853e+06	8.71276e+06	7.46656e+06	3.40333e+06	2.31507e+06	2.83423e+06	2.9949e+06	2.84505e+06	2.84406e+06	2.94252e+06	2.94292e+06	C00346	HMDB0000224	1015	1071-23-4	17553	5233	ko00563,ko00564,ko00600,ko01100,ko04071
MEDP0039	Betaine	甜菜碱	Others	其他	Others	其他	118.1	117.079	[M+H]+	C5H11NO2	1.63759e+07	2.07023e+07	2.85152e+07	9.44263e+06	1.83272e+07	1.46075e+07	1.71937e+07	1.50892e+07	3.01253e+07	1.51661e+07	1.6002e+07	2.33287e+07	2.76845e+07	2.19801e+07	3.81228e+06	1.42531e+07	3.1922e+07	2.65132e+07	7.658e+06	2.41794e+07	6.52353e+06	2.93477e+07	2.16969e+07	2.03361e+07	2.42975e+07	2.48532e+07	2.48675e+07	2.53394e+07	2.33345e+07	2.56361e+07	C00719	HMDB0000043	247	107-43-7	17750	287	ko00260,ko01100,ko02010
MEDP1988	Hydroxyurea	羟基脲	Others	其他	Others	其他	123	76.0273	[M+HCOO+2H]+	CH4N2O2	113388	387846	758137	267555	108015	299677	304157	139981	244284	136342	66487.4	209480	52878.7	477670	129208	132985	136118	502598	25943	27497.5	43844.7	24315.3	32720.6	32876.5	715194	697609	834102	738844	741296	738844	C07044	HMDB0015140	3657	127-07-1	44423	-	ko01100
MEDP1076	Kojibiose	曲二糖	Others	其他	Others	其他	325.1	342.116	[M-H2O+H]+	C12H22O11	2.37003e+06	2.85643e+06	2.19396e+06	2.16411e+06	4.14641e+06	1.99921e+06	2.43202e+06	1.80678e+06	2.46974e+06	2.44049e+06	2.04443e+06	1.74338e+06	2.59658e+06	2.72218e+06	2.03699e+06	2.93542e+06	2.4745e+06	3.0177e+06	2.445e+06	2.50925e+06	2.30797e+06	1.8423e+06	3.79097e+06	2.43638e+06	2.2478e+06	2.24077e+06	2.12513e+06	2.23187e+06	2.18648e+06	2.21841e+06	C19632	HMDB0011742	164939	2140-29-6	33020	-	-
MEDP2143	N,N-Bis(2-hydroxyethyl)dodecanamide	二乙醇胺月桂酸	FA	脂肪酰类	Others	其他	288.3	287.246	[M+H]+	C16H33NO3	113899	117084	139756	146600	102802	125150	120944	128600	109766	106405	160482	134958	149920	148269	147639	137750	137258	149901	133514	151340	176412	165781	143960	128432	132537	132549	134454	133746	133750	132310	C06179	HMDB0032358	8430	120-40-1	-	-	ko01100
MEDP2241	Sphingosine (d17:1)	鞘氨醇 (d17:1)	SL	鞘脂类	SPH	鞘氨醇	286.3	285.266	[M+H]+	C17H35NO2	1.51023e+06	833382	1.60987e+06	1.54744e+06	1.63121e+06	1.44349e+06	803781	1.14082e+06	1.74316e+06	1.52784e+06	1.68247e+06	1.14221e+06	1.35722e+06	1.43126e+06	1.50101e+06	1.48939e+06	1.42679e+06	1.44178e+06	1.2246e+06	1.47367e+06	1.16485e+06	1.69922e+06	1.4123e+06	1.16859e+06	1.4772e+06	1.43875e+06	1.47596e+06	1.41677e+06	1.39733e+06	1.6536e+06	-	-	5283557	6918-48-5	-	-	-
MEDP0871	Dihydro-D-sphingosine	二氢-D-鞘氨醇	SL	鞘脂类	SM	鞘磷脂	302.305	301.298	[M+H]+	C18H39NO2	1.05782e+06	1.04106e+06	999607	867385	976391	915966	1.07152e+06	1.0021e+06	1.0373e+06	1.09209e+06	1.02941e+06	1.06923e+06	1.89427e+06	2.95034e+06	2.8845e+06	2.71935e+06	4.58501e+06	1.89459e+06	1.18386e+06	1.03008e+06	1.74794e+06	673736	2.26342e+06	1.5217e+06	1.53993e+06	1.51498e+06	1.51493e+06	1.52268e+06	1.52266e+06	1.5128e+06	C00836	HMDB0000269	91486	764-22-7	-	-	ko00600,ko01100,ko04071
MEDN0372	LPA(0:0/16:0)	LPA(0:0/16:0)	GP	甘油磷脂类	LPA	溶血磷脂酸	409.2	410.243	[M-H]-	C19H39O7P	48154.6	38827.7	18462	21904.9	16398	10410.4	91643.8	88899.3	74762	100472	110099	111313	1.05262	1.05262	1.05262	1.05262	1.05262	1.05276	7787.15	8614.12	9372.94	5136.39	11544.1	18338	70352.1	68619	70376.8	69364.2	68850.9	70721	C00416	HMDB0007849	53478599	-	-	-	ko00561,ko00564,ko01100,ko04024,ko04070,ko04072,ko04666,ko04912,ko04975,ko05200,ko05212,ko05231
MEDN1600	LPA(16:0/0:0)	LPA(16:0/0:0)	GP	甘油磷脂类	LPA	溶血磷脂酸	409.2	410.243	[M-H]-	C19H39O7P	64767	62743.6	34300.2	41578.2	21267.4	23715.2	145299	170437	124064	164990	145400	201439	1.69503	1.69503	1.69503	1.69503	1.69503	1.69503	1.69503	35741.2	32646.7	1.69503	22421.3	38985.5	121637	121851	107959	117107	117112	118510	C04036	HMDB0007853	6419701	22002-85-3	64023	-	-
MEDP0336	LPC(0:0/14:0)	LPC(0:0/14:0)	GP	甘油磷脂类	LPC	溶血磷脂酰胆碱	468.3	467.301	[M+H]+	C22H46NO7P	3.82538e+06	4.27269e+06	1.82931e+06	1.05868e+06	726920	415667	4.84445e+06	7.8691e+06	3.306e+06	1.62358e+07	7.18417e+06	5.04172e+06	871428	1.07332e+06	1.3204e+06	1.21698e+06	2.31502e+06	774360	7.76698e+06	6.24741e+06	9.88668e+06	1.19831e+06	1.31885e+07	1.31248e+07	4.0972e+06	4.15019e+06	4.14946e+06	4.10202e+06	4.10236e+06	4.14558e+06	-	HMDB0010379	460604	20559-16-4	64489	-	-
MEDP1692	LPC(0:0/15:0)	LPC(0:0/15:0)	GP	甘油磷脂类	LPC	溶血磷脂酰胆碱	482.3	481.317	[M+H]+	C23H48NO7P	2.00903e+06	1.4273e+06	796513	573317	388649	293087	2.45436e+06	2.18865e+06	1.08661e+06	2.77174e+06	2.57816e+06	2.31449e+06	100930	164844	193312	247959	239855	84513.8	196886	210649	241072	71696.8	502831	343347	1.81725e+06	1.84583e+06	1.83042e+06	1.82525e+06	1.82744e+06	1.83932e+06	-	-	-	108273-89-8	-	-	-
MEDP1346	LPC(0:0/16:0)	LPC(0:0/16:0)	GP	甘油磷脂类	LPC	溶血磷脂酰胆碱	496.3	495.332	[M+H]+	C24H50NO7P	2.53246e+07	2.06206e+07	1.04255e+07	6.42335e+06	5.64833e+06	3.63937e+06	5.38457e+07	5.59321e+07	2.94356e+07	5.08084e+07	5.5611e+07	6.04259e+07	2.03236e+06	3.53023e+06	3.46753e+06	4.99489e+06	4.73452e+06	1.53246e+06	2.65475e+06	3.18772e+06	3.31845e+06	1.18579e+06	8.31298e+06	6.6345e+06	3.95783e+07	3.98921e+07	3.96831e+07	3.95595e+07	3.99092e+07	3.97193e+07	-	-	-	-	-	-	-
MEDP1699	LPC(0:0/16:1)	LPC(0:0/16:1)	GP	甘油磷脂类	LPC	溶血磷脂酰胆碱	494.3	493.317	[M+H]+	C24H48NO7P	198408	119225	104081	58827.4	83786.6	43284.3	632102	777527	540174	993679	539218	555735	167188	57041.2	36993.1	42546.9	87663.7	65425.7	168385	69618	139970	59475.6	197975	184496	672520	681546	681536	668786	678984	678963	-	-	-	-	-	-	-
MEDP1691	LPC(0:0/17:0)	LPC(0:0/17:0)	GP	甘油磷脂类	LPC	溶血磷脂酰胆碱	510.4	509.348	[M+H]+	C25H52NO7P	1.88728e+08	1.96684e+08	1.97899e+08	194730581	1.98574e+08	1.96727e+08	2.09075e+08	2.09097e+08	2.08284e+08	2.08929e+08	2.02149e+08	1.99999e+08	2.33214e+08	230741633	2.5304e+08	2.31814e+08	1.52092e+08	228751441	1.98403e+08	1.56236e+08	2.49928e+08	176034854	2.38837e+08	2.07091e+08	1.93491e+08	1.95381e+08	1.95413e+08	1.94719e+08	1.94195e+08	1.9472e+08	-	-	-	-	-	-	-
MEDP1700	LPC(0:0/18:0)	LPC(0:0/18:0)	GP	甘油磷脂类	LPC	溶血磷脂酰胆碱	524.4	523.364	[M+H]+	C26H54NO7P	4.52131e+06	2.72365e+06	1.865e+06	1.9909e+06	1.94844e+06	1.40302e+06	1.06226e+07	6.39925e+06	4.42279e+06	6.64459e+06	8.61889e+06	9.82323e+06	631689	895664	1.00523e+06	1.27049e+06	1.39012e+06	650210	754462	825886	927997	487045	1.91585e+06	1.50168e+06	6.32572e+06	6.32961e+06	6.42068e+06	6.34288e+06	6.45942e+06	6.34463e+06	-	-	-	-	-	-	-
MEDP1701	LPC(0:0/18:1)	LPC(0:0/18:1)	GP	甘油磷脂类	LPC	溶血磷脂酰胆碱	522.3	521.348	[M+H]+	C26H52NO7P	1.40064e+06	901690	793421	514988	649974	508324	5.77863e+06	4.44573e+06	3.46778e+06	4.56647e+06	4.49962e+06	5.7339e+06	337429	419665	315068	389248	667181	499658	299782	173632	361304	160964	603663	498173	7.95176e+06	7.96545e+06	7.90179e+06	7.89678e+06	7.89659e+06	8.00617e+06	-	-	-	-	-	-	-
MEDP0495	LPC(0:0/18:2)	LPC(0:0/18:2)	GP	甘油磷脂类	LPC	溶血磷脂酰胆碱	520.3	519.332	[M+H]+	C26H50NO7P	1.2169e+06	1.056e+06	476136	357420	532656	373572	1.8877e+06	2.07641e+06	1.52667e+06	2.05316e+06	2.37921e+06	1.65811e+06	123106	230876	226480	208946	358687	285927	410660	230207	413746	129178	468645	708502	3.99016e+06	4.00794e+06	3.99043e+06	3.99486e+06	4.00807e+06	3.99489e+06	-	-	-	-	-	-	-
MEDP1331	LPC(0:0/20:3)	LPC(0:0/20:3)	GP	甘油磷脂类	LPC	溶血磷脂酰胆碱	546.3	545.348	[M+H]+	C28H52NO7P	5.03303	5.03303	5.03303	5.03303	5.03303	5.03303	102676	78892	76974.5	121854	115711	72417.6	2.81005	2.81005	2.81005	2.81005	2.81005	2.81005	47214.8	27173.1	36989	12199.2	53069.4	79819.5	123775	123549	124390	124373	123705	123568	-	-	-	-	-	-	-
MEDP1333	LPC(0:0/20:4)	LPC(0:0/20:4)	GP	甘油磷脂类	LPC	溶血磷脂酰胆碱	544.3	543.332	[M+H]+	C28H50NO7P	117406	77192.2	59653.2	40099.5	65070.1	55584.5	155863	117439	79684.8	129374	192751	126994	29088.6	22253.4	21103.9	32503.7	46860.2	28201	29777.7	15700.3	23705.9	13502.5	52733.1	49920.7	257605	260855	257733	260244	257794	260208	-	-	-	-	-	-	-
MEDP1318	LPC(0:0/22:4)	LPC(0:0/22:4)	GP	甘油磷脂类	LPC	溶血磷脂酰胆碱	572.4	571.364	[M+H]+	C30H54NO7P	8170.74	6266.13	7674.16	2805.43	7132.97	5843.06	12849	5527.75	3603.46	10286.9	11725.3	6462.01	4304.84	4437.45	1843.61	5755.19	5970.56	1086.98	4452.32	2303.44	3921.66	2536.25	6475.22	5954.49	26005.4	28467.2	28468.3	27211	27767.8	27773.6	-	-	-	-	-	-	-
MEDP1321	LPC(0:0/22:5)	LPC(0:0/22:5)	GP	甘油磷脂类	LPC	溶血磷脂酰胆碱	570.3	569.348	[M+H]+	C30H52NO7P	16625.9	8248.28	11955.7	6111.93	9668.14	9087.17	15288.6	6721.73	6287.03	13368.3	14728.5	9586.07	3747.92	3591.98	1864.59	4596.33	4131.63	4681.63	2709.89	818.043	1032.39	590.048	2976.07	2755.99	61989.1	62416	60887.8	61214.2	61252.1	62179.7	-	-	-	-	-	-	-
MEDP1693	LPC(12:0/0:0)	LPC(12:0/0:0)	GP	甘油磷脂类	LPC	溶血磷脂酰胆碱	440.3	439.27	[M+H]+	C20H42NO7P	2.42946e+06	3.62636e+06	755095	269609	259644	148869	264277	357844	208391	1.05566e+06	371720	253058	34428.1	78601	99807.9	178218	345295	23731.1	210726	219858	292038	16502.6	312055	398906	778179	788562	788479	787334	783117	783119	-	-	-	-	-	-	-
MEDP1779	LPC(13:0/0:0)	LPC(13:0/0:0)	GP	甘油磷脂类	LPC	溶血磷脂酰胆碱	454.3	453.286	[M+H]+	C21H44NO7P	95844.7	81566.9	37267.2	15390.6	12609.2	11076.4	21385.9	23091.8	10349.3	55831.5	20737.7	13381.8	5.82204	5.82204	5.82204	5.82204	5.82204	5.82204	7965.45	13328	13107.3	4544.53	16562.5	17830.3	31797.1	31796.7	33564.7	32340.8	32353.3	32972.4	-	-	24779450	20559-17-5	-	-	-
MEDP0494	LPC(15:0/0:0)	LPC(15:0/0:0)	GP	甘油磷脂类	LPC	溶血磷脂酰胆碱	482.3	481.317	[M+H]+	C23H48NO7P	2.00903e+06	1.4273e+06	796513	573317	388649	293087	2.45436e+06	2.18865e+06	1.08661e+06	2.77174e+06	2.57816e+06	2.31449e+06	100930	164844	193312	247959	239855	84513.8	196886	210649	241072	71696.8	502831	343347	1.81725e+06	1.84583e+06	1.83042e+06	1.82525e+06	1.82744e+06	1.83932e+06	-	HMDB0010381	-	-	580912	-	-
MEDP0338	LPC(16:0/0:0)	LPC(16:0/0:0)	GP	甘油磷脂类	LPC	溶血磷脂酰胆碱	496.3	495.332	[M+H]+	C24H50NO7P	2.53246e+07	2.06206e+07	1.04255e+07	6.42335e+06	5.64833e+06	3.63937e+06	5.38457e+07	5.59321e+07	2.94356e+07	5.08084e+07	5.5611e+07	6.04259e+07	2.03236e+06	3.53023e+06	3.46753e+06	4.99489e+06	4.73452e+06	1.53246e+06	2.65475e+06	3.18772e+06	3.31845e+06	1.18579e+06	8.31298e+06	6.6345e+06	3.95783e+07	3.98921e+07	3.96831e+07	3.95595e+07	3.99092e+07	3.97193e+07	C04230	HMDB0010382	460602	17364-16-8	72998	-	ko00564,ko05231
MEDP1348	LPC(16:1/0:0)	LPC(16:1/0:0)	GP	甘油磷脂类	LPC	溶血磷脂酰胆碱	494.3	493.317	[M+H]+	C24H48NO7P	198408	119225	104081	58827.4	83786.6	43284.3	632102	777527	540174	993679	539218	555735	167188	57041.2	36993.1	42546.9	87663.7	65425.7	168385	69618	139970	59475.6	197975	184496	672520	681546	681536	668786	678984	678963	-	HMDB0010383	24779461	-	73851	-	-
MEDP0434	LPC(17:0/0:0)	LPC(17:0/0:0)	GP	甘油磷脂类	LPC	溶血磷脂酰胆碱	510.1	509.348	[M+H]+	C25H52NO7P	9.89288e+07	1.01068e+08	1.04549e+08	9.99118e+07	101481847	101914770	1.06984e+08	1.09174e+08	1.10709e+08	1.0902e+08	1.05319e+08	1.06163e+08	1.20176e+08	1.24929e+08	1.26543e+08	1.19019e+08	101388046	1.15187e+08	1.11455e+08	1.26766e+08	1.2656e+08	1.27391e+08	1.28053e+08	1.03981e+08	9.91941e+07	1.00421e+08	1.00438e+08	9.98269e+07	9.98937e+07	9.98269e+07	C04230	HMDB0012108	24779463	50930-23-9	74340	-	ko00564,ko05231
MEDP1337	LPC(18:0/0:0)	LPC(18:0/0:0)	GP	甘油磷脂类	LPC	溶血磷脂酰胆碱	524.4	523.364	[M+H]+	C26H54NO7P	4.52131e+06	2.72365e+06	1.865e+06	1.9909e+06	1.94844e+06	1.40302e+06	1.06226e+07	6.39925e+06	4.42279e+06	6.64459e+06	8.61889e+06	9.82323e+06	631689	895664	1.00523e+06	1.27049e+06	1.39012e+06	650210	754462	825886	927997	487045	1.91585e+06	1.50168e+06	6.32572e+06	6.32961e+06	6.42068e+06	6.34288e+06	6.45942e+06	6.34463e+06	-	HMDB0010384	497299	-	73858	-	-
MEDP1339	LPC(18:1/0:0)	LPC(18:1/0:0)	GP	甘油磷脂类	LPC	溶血磷脂酰胆碱	522.3	521.348	[M+H]+	C26H52NO7P	1.40064e+06	901690	793421	514988	649974	508324	5.77863e+06	4.44573e+06	3.46778e+06	4.56647e+06	4.49962e+06	5.7339e+06	337429	419665	315068	389248	667181	499658	299782	173632	361304	160964	603663	498173	7.95176e+06	7.96545e+06	7.90179e+06	7.89678e+06	7.89659e+06	8.00617e+06	-	HMDB0010385	53480465	3542-29-8	86255	-	-
MEDP1341	LPC(18:2/0:0)	LPC(18:2/0:0)	GP	甘油磷脂类	LPC	溶血磷脂酰胆碱	520.3	519.332	[M+H]+	C26H50NO7P	1.2169e+06	1.056e+06	476136	357420	532656	373572	1.8877e+06	2.07641e+06	1.52667e+06	2.05316e+06	2.37921e+06	1.65811e+06	123106	230876	226480	208946	358687	285927	410660	230207	413746	129178	468645	708502	3.99016e+06	4.00794e+06	3.99043e+06	3.99486e+06	4.00807e+06	3.99489e+06	-	HMDB0010386	11005824	-	28733	-	-
MEDP1332	LPC(20:3/0:0)	LPC(20:3/0:0)	GP	甘油磷脂类	LPC	溶血磷脂酰胆碱	546.3	545.348	[M+H]+	C28H52NO7P	5.03303	5.03303	5.03303	5.03303	5.03303	5.03303	102676	78892	76974.5	121854	115711	72417.6	2.81005	2.81005	2.81005	2.81005	2.81005	2.81005	47214.8	27173.1	36989	12199.2	53069.4	79819.5	123775	123549	124390	124373	123705	123568	-	-	-	-	-	-	-
MEDP1334	LPC(20:4/0:0)	LPC(20:4/0:0)	GP	甘油磷脂类	LPC	溶血磷脂酰胆碱	544.3	543.332	[M+H]+	C28H50NO7P	117406	77192.2	59653.2	40099.5	65070.1	55584.5	155863	117439	79684.8	129374	192751	126994	29088.6	22253.4	21103.9	32503.7	46860.2	28201	29777.7	15700.3	23705.9	13502.5	52733.1	49920.7	257605	260855	257733	260244	257794	260208	-	-	-	-	-	-	-
MEDP1319	LPC(22:4/0:0)	LPC(22:4/0:0)	GP	甘油磷脂类	LPC	溶血磷脂酰胆碱	572.4	571.364	[M+H]+	C30H54NO7P	8170.74	6266.13	7674.16	2805.43	7132.97	5843.06	12849	5527.75	3603.46	10286.9	11725.3	6462.01	4304.84	4437.45	1843.61	5755.19	5970.56	1086.98	4452.32	2303.44	3921.66	2536.25	6475.22	5954.49	26005.4	28467.2	28468.3	27211	27767.8	27773.6	-	-	-	-	-	-	-
MEDP1322	LPC(22:5/0:0)	LPC(22:5/0:0)	GP	甘油磷脂类	LPC	溶血磷脂酰胆碱	570.3	569.348	[M+H]+	C30H52NO7P	13248.4	9131.25	12205.8	3887.24	10426.8	5912.47	10766.6	5615.81	6042.18	8562.07	13391.6	9028.35	2010.72	3477.66	3339.22	4884.43	4336.47	4036.17	1189.87	1044.47	1695.24	1300.01	2899.86	2015.38	61191.1	61898.9	62521.8	62227.9	61535.3	62214.6	-	-	-	-	-	-	-
MEDP0537	LPC(O-16:0/2:0)	LPC(O-16:0/2:0)	GP	甘油磷脂类	LPC	溶血磷脂酰胆碱	524.4	523.364	[M+H]+	C26H54NO7P	4.52131e+06	2.72365e+06	1.865e+06	1.9909e+06	1.94844e+06	1.40302e+06	1.06226e+07	6.39925e+06	4.42279e+06	6.64459e+06	8.61889e+06	9.82323e+06	631689	895664	1.00523e+06	1.27049e+06	1.39012e+06	650210	754462	825886	927997	487045	1.91585e+06	1.50168e+06	6.32572e+06	6.32961e+06	6.42068e+06	6.34288e+06	6.45942e+06	6.34463e+06	-	HMDB0062195	108156	74389-68-7	44811	-	-
MEDP1695	LPC(O-16:1/0:0)	LPC(O-16:1/0:0)	GP	甘油磷脂类	LPC O	溶血磷脂酰胆碱	480.3	479.338	[M+H]+	C24H50NO6P	106678	47077.8	45390.9	41789.1	39446.1	22295.1	25582.9	36332.9	36974.4	59261.2	39601.7	36010.3	9487.85	8900.45	3079.16	9517.1	21747.2	7082.69	2786.73	9954.08	14487.5	7141.71	24411.2	14869.9	105780	107117	107136	107998	104361	108008	-	-	10917802	97802-53-4	-	-	-
MEDP1658	LPC(O-18:1/0:0)	LPC(O-18:1/0:0)	GP	甘油磷脂类	LPC	溶血磷脂酰胆碱	508.4	507.369	[M+H]+	C26H54NO6P	19547.6	1669.79	2047.47	2481.84	3804.12	1538.16	12916.7	7912.33	14784.6	9948.94	9082.91	8736.49	9404.96	8133.26	4910.77	6500.32	37099.2	2410.92	3510.55	1486.07	1768.26	1204.94	3217.2	4090.01	86713.1	87995.5	87640.3	87112.3	87666.9	87660	-	-	24779510	87907-66-2	-	-	-
MEDP1686	LPE(15:0/0:0)	LPE(15:0/0:0)	GP	甘油磷脂类	LPC	溶血磷脂酰胆碱	440.3	439.27	[M+H]+	C20H42NO7P	54543.4	34203.2	15988.4	16329.1	9693.49	7344.11	54111	55319.4	28016.7	59192	50472.8	44833.4	9857.49	9666.39	8224.05	6347.19	9860.13	10072	26478.2	15366.4	29260.1	4874.53	51394.3	54175.8	50452.7	41716.8	50645.6	49514	52473.8	44789.7	-	HMDB0011502	52925150	-	-	-	-
MEDP1657	PC(O-16:0/0:0)	PC(O-16:0/0:0)	GP	甘油磷脂类	PC O	溶血磷脂酰胆碱	482.4	481.353	[M+H]+	C24H52NO6P	102541	37703.1	27565.3	25316.5	26931.1	15885.5	99755.2	59051.3	71311.1	108885	98060.9	84310.5	29687.9	14223	14123.9	16213.9	71575.8	4959.09	4379.78	3883.37	5145.99	2190.11	5848.9	6975.12	257491	260002	257510	257685	257687	259839	C13903	-	162126	52691-62-0	-	-	-
MEDP1221	PC(O-16:0/O-1:0)	PC(O-16:0/O-1:0)	GP	甘油磷脂类	PC O	溶血磷脂酰胆碱	496.3	495.369	[M+H]+	C25H54NO6P	2.59924e+07	2.02271e+07	1.05938e+07	7.0302e+06	5.95123e+06	3.76079e+06	5.75343e+07	5.78693e+07	3.02879e+07	5.42073e+07	5.99403e+07	6.34194e+07	2.05992e+06	3.86153e+06	3.64058e+06	5.89355e+06	7.6301e+06	1.80235e+06	2.89639e+06	3.32259e+06	3.97712e+06	1.2343e+06	8.67886e+06	7.40487e+06	4.26435e+07	4.29269e+07	4.26492e+07	4.23406e+07	4.2899e+07	4.28971e+07	-	-	-	-	-	-	-
MEDN1485	Glycerophospho-N-Arachidonoyl Ethanolamine	甘油磷酸-N-花生四烯酸乙醇胺	GP	甘油磷脂类	LPE	溶血磷脂酰乙醇胺	500.3	501.285	[M-H]-	C25H44NO7P	27742.5	19793.2	14827.2	14897.4	16750.3	16500.3	144028	134782	59397.7	104714	123977	95681.8	15129.4	6191.59	14652.6	13740.4	29500.1	17326.3	21919.7	9780.54	12713.7	7933.06	28835.1	34207	102824	103545	103541	102732	103503	103505	-	-	71684654	201738-25-2	-	-	-
MEDN1285	LPE(0:0/16:0)	LPE(0:0/16:0)	GP	甘油磷脂类	LPE	溶血磷脂酰乙醇胺	452.3	453.286	[M-H]-	C21H44NO7P	3.89599e+06	2.99334e+06	2.11824e+06	805657	603479	564649	3.4583e+06	4.31212e+06	2.68731e+06	5.14023e+06	4.00329e+06	3.38115e+06	277426	415314	412821	599466	899642	201937	471409	373784	322444	56759.5	812845	1.04601e+06	7.35973e+06	7.35979e+06	7.39023e+06	7.39377e+06	7.35583e+06	7.35612e+06	-	-	-	-	-	-	-
MEDN1287	LPE(0:0/16:1)	LPE(0:0/16:1)	GP	甘油磷脂类	LPE	溶血磷脂酰乙醇胺	450.3	451.27	[M-H]-	C21H42NO7P	61653.6	47784.5	59287.5	31086.4	20926.1	23821.4	309931	404831	228991	372654	237759	259174	18835.6	29865.4	17551.7	20713.1	39931.8	23613.5	114871	28022.3	47509.5	19994.4	90467.5	134350	381427	381001	383814	381397	381412	385035	-	-	-	-	-	-	-
MEDN1279	LPE(0:0/18:0)	LPE(0:0/18:0)	GP	甘油磷脂类	LPE	溶血磷脂酰乙醇胺	480.3	481.317	[M-H]-	C23H48NO7P	1.47799e+06	936361	703904	413654	328013	365989	3.21959e+06	2.32402e+06	2.00534e+06	2.48497e+06	3141396	2.88608e+06	181455	278788	218996	391862	525069	180515	197265	165102	210690	47603.8	524230	429804	3.52367e+06	3.52982e+06	3.42803e+06	3.48688e+06	3.4908e+06	3.48688e+06	-	-	-	-	-	-	-
MEDN1282	LPE(0:0/18:2)	LPE(0:0/18:2)	GP	甘油磷脂类	LPE	溶血磷脂酰乙醇胺	476.3	477.286	[M-H]-	C23H44NO7P	869749	646992	377092	356192	395010	468781	4.03827e+06	5.43487e+06	2.03082e+06	3.3106e+06	3.93522e+06	2.74492e+06	150942	268847	226141	275449	516670	494278	1.03453e+06	290733	322429	141271	779461	2.11822e+06	3.39817e+06	3.41121e+06	3.41109e+06	3.37205e+06	3.4157e+06	3.41577e+06	-	-	-	-	-	-	-
MEDN1271	LPE(0:0/20:2)	LPE(0:0/20:2)	GP	甘油磷脂类	LPE	溶血磷脂酰乙醇胺	504.3	505.317	[M-H]-	C25H48NO7P	8.8006	8.8006	8.8006	8.8006	8.8006	8.8006	24226.1	23205.5	11022.8	18993.5	30437.8	18219	2016.41	6668.58	4169.27	10048.7	14907.6	8344.14	17442.2	4460.36	3128.16	2.01667	4846.39	29219.9	22637.9	21039.8	21468.6	21993.8	21993.8	22165.2	-	-	-	-	-	-	-
MEDN1273	LPE(0:0/20:3)	LPE(0:0/20:3)	GP	甘油磷脂类	LPE	溶血磷脂酰乙醇胺	502.3	503.301	[M-H]-	C25H46NO7P	6714.84	3408.82	2297.96	5.84964	5.84964	6813.47	25858.3	5.84964	9830.56	24018.1	13403.8	16681.2	4014.63	3741.04	4676.33	6941.75	9147.95	2730.87	1.08693	1.08693	1.08693	1.08693	1.08693	1.08693	21674.8	21558.2	21557.2	21651.6	21719	21506.4	-	-	-	-	-	-	-
MEDN1264	LPE(0:0/22:4)	LPE(0:0/22:4)	GP	甘油磷脂类	LPE	溶血磷脂酰乙醇胺	528.3	529.317	[M-H]-	C27H48NO7P	7.65932	7.65932	7.65932	7.65932	7.65932	7.65932	39320.6	28685	9294.29	30119.6	24855.4	19926.8	1483.72	968.864	2211.86	3026.76	5042.8	2408.8	4864.36	975.553	1.09474	1034.28	3589.08	5458.03	24295.7	23988	23987.3	24570.6	23937.3	23955.7	-	-	-	-	-	-	-
MEDN1267	LPE(0:0/22:5)	LPE(0:0/22:5)	GP	甘油磷脂类	LPE	溶血磷脂酰乙醇胺	526.3	527.301	[M-H]-	C27H46NO7P	2673.54	1085.03	2402.64	1358.86	2166.65	2325.03	14754.1	10266.7	5235.51	9228.97	11561.9	8161.64	1185.9	1105.7	1143.74	1360.25	2678.69	2238.72	0.681513	0.681513	0.681513	0.681513	0.681513	0.681513	15490.9	15260.2	15446.3	15421.3	15296.4	15421.3	-	-	-	-	-	-	-
MEDN1269	LPE(0:0/22:6)	LPE(0:0/22:6)	GP	甘油磷脂类	LPE	溶血磷脂酰乙醇胺	524.3	525.286	[M-H]-	C27H44NO7P	1857.23	1078.69	3113.1	929.578	1198.29	1467.86	3266.81	1856.16	900.268	1496.71	2935.04	1766.16	1058.38	501.662	372.364	969.443	2810.38	1163.88	0.350434	0.350434	0.350434	0.350434	0.350434	0.350434	6578.47	6632.37	6642.35	6646.08	6647.41	6573.77	-	-	-	-	-	-	-
MEDN0368	LPE(14:0/0:0)	LPE(14:0/0:0)	GP	甘油磷脂类	LPE	溶血磷脂酰乙醇胺	424.2	425.254	[M-H]-	C19H40NO7P	1.1789e+06	1.01984e+06	441291	210467	80486.8	44951.9	284486	600972	314126	905410	466437	326067	24855	44871.7	47844.2	74111.9	94422.4	16302.8	98402.2	70814.3	74783.2	9254.77	152238	192400	649770	656119	656105	654006	655241	656861	-	-	-	-	-	-	-
MEDN0366	LPE(16:0/0:0)	LPE(16:0/0:0)	GP	甘油磷脂类	LPE	溶血磷脂酰乙醇胺	452.3	453.286	[M-H]-	C21H44NO7P	3.89599e+06	2.99334e+06	2.11824e+06	805657	603479	564649	3.4583e+06	4.31212e+06	2.68731e+06	5.14023e+06	4.00329e+06	3.38115e+06	277426	415314	412821	599466	899642	201937	471409	373784	322444	56759.5	812845	1.04601e+06	7.35973e+06	7.35979e+06	7.39023e+06	7.39377e+06	7.35583e+06	7.35612e+06	-	-	-	-	-	-	-
MEDP0638	LPE(16:1/0:0)	LPE(16:1/0:0)	GP	甘油磷脂类	LPE	溶血磷脂酰乙醇胺	452.3	451.27	[M+H]+	C21H42NO7P	3699.38	1234.02	2263.22	1127.94	298.99	1163.29	10792.4	9007.32	7899.5	12150.6	7704.4	5774.3	452.261	479.603	313.334	699.551	1532.4	568.881	2429.41	711.376	1118.39	436.91	1985.16	2894.52	11133	11134.8	10328.1	10707.5	11052.8	10692.1	-	HMDB0011504	52925129	-	-	-	-
MEDP1875	LPE(17:1/0:0)	LPE(17:1/0:0)	GP	甘油磷脂类	LPE	溶血磷脂酰乙醇胺	466.3	465.286	[M+H]+	C22H44NO7P	18924.1	11632	26053.4	12316.2	4972.04	12468.5	59756	58321.7	41173.1	40308.4	40690.6	57456.4	8901.93	7335.37	12332.4	11212.7	13105.1	36241.9	15546.9	3907.43	5645.29	5117.02	22537.2	14496.9	109129	109163	110562	109080	111566	109103	-	-	42607464	-	-	-	-
MEDN0364	LPE(18:0/0:0)	LPE(18:0/0:0)	GP	甘油磷脂类	LPE	溶血磷脂酰乙醇胺	480.3	481.317	[M-H]-	C23H48NO7P	1.47799e+06	936361	703904	413654	328013	365989	3.21959e+06	2.32402e+06	2.00534e+06	2.48497e+06	3141396	2.88608e+06	181455	278788	218996	391862	525069	180515	197265	165102	210690	47603.8	524230	429804	3.52367e+06	3.52982e+06	3.42803e+06	3.48688e+06	3.4908e+06	3.48688e+06	-	HMDB0011130	9547068	-	75036	-	-
MEDN0362	LPE(18:1/0:0)	LPE(18:1/0:0)	GP	甘油磷脂类	LPE	溶血磷脂酰乙醇胺	478.3	479.301	[M-H]-	C23H46NO7P	1.63985e+06	1.22212e+06	1.72088e+06	943200	715493	1.21768e+06	5.96341e+06	6.62504e+06	5.01519e+06	4.7988e+06	5.55397e+06	5.8145e+06	873332	1.03847e+06	819470	900489	1.82175e+06	1.46124e+06	1.23031e+06	582381	646235	258424	1.73329e+06	2.1478e+06	1.19406e+07	1.17354e+07	1.18764e+07	1.18906e+07	1.18618e+07	1.18907e+07	-	HMDB0011506	53480949	-	74971	-	-
MEDP1904	LPE(18:2/0:0)	LPE(18:2/0:0)	GP	甘油磷脂类	LPE	溶血磷脂酰乙醇胺	478.3	477.286	[M+H]+	C23H44NO7P	813646	722194	418488	405920	530137	589027	4.37817e+06	5.52237e+06	2.36407e+06	3.8163e+06	4.94153e+06	3.21845e+06	239286	351005	354597	413374	921522	682622	1.20691e+06	346598	484379	211647	1.3437e+06	1.98674e+06	4.01857e+06	4.09342e+06	4.09319e+06	4.0372e+06	4.07852e+06	4.07818e+06	-	HMDB0011517	42607465	652149-09-2	64395	-	-
MEDN1272	LPE(20:2/0:0)	LPE(20:2/0:0)	GP	甘油磷脂类	LPE	溶血磷脂酰乙醇胺	504.3	505.317	[M-H]-	C25H48NO7P	8.8006	8.8006	8.8006	8.8006	8.8006	8.8006	24226.1	23205.5	11022.8	18993.5	30437.8	18219	2016.41	6668.58	4169.27	10048.7	14907.6	8344.14	17442.2	4460.36	3128.16	2.01667	4846.39	29219.9	22637.9	21039.8	21468.6	21993.8	21993.8	22165.2	-	-	-	-	-	-	-
MEDN1274	LPE(20:3/0:0)	LPE(20:3/0:0)	GP	甘油磷脂类	LPE	溶血磷脂酰乙醇胺	502.3	503.301	[M-H]-	C25H46NO7P	6714.84	3408.82	2297.96	5.84964	5.84964	6813.47	25858.3	5.84964	9830.56	24018.1	13403.8	16681.2	4014.63	3741.04	4676.33	6941.75	9147.95	2730.87	1.08693	1.08693	1.08693	1.08693	1.08693	1.08693	21674.8	21558.2	21557.2	21651.6	21719	21506.4	-	-	-	-	-	-	-
MEDN1276	LPE(20:4/0:0)	LPE(20:4/0:0)	GP	甘油磷脂类	LPE	溶血磷脂酰乙醇胺	500.3	501.286	[M-H]-	C25H44NO7P	27742.5	19793.2	14827.2	14897.4	16750.3	16500.3	144028	134782	59397.7	104714	123977	95681.8	15129.4	6191.59	14652.6	13740.4	29500.1	17326.3	21919.7	9780.54	12713.7	7933.06	28835.1	34207	102824	103545	103541	102732	103503	103505	-	-	-	-	-	-	-
MEDN1265	LPE(22:4/0:0)	LPE(22:4/0:0)	GP	甘油磷脂类	LPE	溶血磷脂酰乙醇胺	528.3	529.317	[M-H]-	C27H48NO7P	7.65932	7.65932	7.65932	7.65932	7.65932	7.65932	39320.6	28685	9294.29	30119.6	24855.4	19926.8	1483.72	968.864	2211.86	3026.76	5042.8	2408.8	4864.36	975.553	1.09474	1034.28	3589.08	5458.03	24295.7	23988	23987.3	24570.6	23937.3	23955.7	-	-	-	-	-	-	-
MEDN1268	LPE(22:5/0:0)	LPE(22:5/0:0)	GP	甘油磷脂类	LPE	溶血磷脂酰乙醇胺	526.3	527.301	[M-H]-	C27H46NO7P	2673.54	1085.03	2402.64	1358.86	2166.65	2325.03	14754.1	10266.7	5235.51	9228.97	11561.9	8161.64	1185.9	1105.7	1143.74	1360.25	2678.69	2238.72	0.681513	0.681513	0.681513	0.681513	0.681513	0.681513	15490.9	15260.2	15446.3	15421.3	15296.4	15421.3	-	-	-	-	-	-	-
MEDN1270	LPE(22:6/0:0)	LPE(22:6/0:0)	GP	甘油磷脂类	LPE	溶血磷脂酰乙醇胺	524.3	525.286	[M-H]-	C27H44NO7P	1857.23	1078.69	3113.1	929.578	1198.29	1467.86	3266.81	1856.16	900.268	1496.71	2935.04	1766.16	1058.38	501.662	372.364	969.443	2810.38	1163.88	0.350434	0.350434	0.350434	0.350434	0.350434	0.350434	6578.47	6632.37	6642.35	6646.08	6647.41	6573.77	-	-	-	-	-	-	-
MEDN0209	Tryptamine	色胺	Tryptamines,Cholines,Pigments	色胺、胆碱、色素	Tryptamines	色胺	159.1	160.1	[M-H]-	C10H12N2	20862.9	54861.4	77536	34277.2	6472.31	39903.4	49315.6	31588.9	37745	28499.8	15408.4	65029	9554.36	28861.9	14284.6	16613.5	9578.46	47075.3	4005.2	2948.55	3597.77	3365.29	4515.54	5095.47	82609.5	82718.9	85595.8	85984.9	82792.4	82799.2	C00398	HMDB0000303	1150	61-54-1	16765	-	ko00380,ko01100,ko04080
MEDN1921	(2R)-Glycerol-O-β-D-galactopyranoside	（2R）-甘油-O-β-D-吡喃半乳糖苷	Carbohydrates and Its metabolites	碳水化合物及其代谢物	Carbohydrates and Its metabolites	碳水化合物及其代谢物	253.1	254.1	[M-H]-	C9H18O8	67331.8	38256.3	38058.5	51495.2	67374.8	85241	98683.8	98683.8	136486	63532.5	77052.3	71503.8	108198	70531.1	75228.7	72848.8	75788.1	79631.2	87597.2	79676.6	91965.6	44534.7	55057.6	58418.6	69191.1	68041.6	70342.6	70154.2	70099.3	66604	C05401	HMDB0038664	16048618	16232-91-0	-	-	ko00052,ko00561
MEDN1897	L-Gulose	L-古洛糖	Carbohydrates and Its metabolites	碳水化合物及其代谢物	Carbohydrates and Its metabolites	碳水化合物及其代谢物	179.1	180.16	[M-H]-	C6H12O6	1.47398e+06	2.17855e+06	863038	1.15034e+06	786956	1.40591e+06	1.71405e+06	1.54737e+06	1.84724e+06	2.98775e+06	1.34038e+06	1.7129e+06	2.61149e+06	3.62379e+06	2.37203e+06	2.38236e+06	2.41807e+06	2.53865e+06	2.81222e+06	3.93975e+06	2.26206e+06	2.80945e+06	3.97392e+06	3.84211e+06	2.16098e+06	2.26733e+06	2.15681e+06	2.12568e+06	2.12975e+06	2.30517e+06	C15923	-	80127	6027-89-0	-	-	ko00053
MEDN2056	L-Iditol	L-艾杜糖醇	Carbohydrates and Its metabolites	碳水化合物及其代谢物	Carbohydrates and Its metabolites	碳水化合物及其代谢物	181.1	182.079	[M-H]-	C6H14O6	74592	63349	77653.3	119558	113416	106265	136612	130287	147083	97046.1	115484	147155	69658.9	93965.9	116690	56692.9	85125.3	119917	85085.3	102076	89908.2	68273.8	97208.6	63183.1	89474.4	88522.8	86942.5	86898.6	89542.9	86958.4	C01507	HMDB0011632	5460044	488-45-9	18202	-	-
MEDN1931	L-lyxose	L-来苏糖	Carbohydrates and Its metabolites	碳水化合物及其代谢物	Carbohydrates and Its metabolites	碳水化合物及其代谢物	149	150.13	[M-H]-	C5H10O5	372510	229799	317617	350534	289661	422259	502048	419918	405228	330901	391056	384780	260582	329055	340973	335396	330053	417515	370345	300894	354894	242537	211491	214253	280292	287699	288305	282739	282745	291412	-	-	644176	1949-78-6	-	-	-
MEDP2366	N,N'-Diacetyl-Chitobiose	N,N'-二乙酰基壳二糖	Carbohydrates and Its metabolites	碳水化合物及其代谢物	Carbohydrates and Its metabolites	碳水化合物及其代谢物	425.2	424.169	[M+H]+	C16H28N2O11	8243.88	9550.67	6411.85	16546.3	23525.5	4707.35	34313.1	72243.8	75855.9	50573	35212.1	174392	6.08957	6.14031	6.11105	6.59187	6.81776	6.111	21909.4	19718.5	13595.1	15712	38511.6	14381.1	26683.1	26490.2	22673.8	25128.8	25053.2	28071.2	C01674	HMDB0062702	439544	35061-50-8	28681	-	ko00520,ko01100,ko02010
MEDP2359	N-acetyl-D-Lactosamine	N-乙酰基-D-乳糖胺	Carbohydrates and Its metabolites	碳水化合物及其代谢物	Carbohydrates and Its metabolites	碳水化合物及其代谢物	384.2	383.143	[M+H]+	C14H25NO11	557550	806069	1.23437e+06	3.65866e+06	1.55889e+06	1.37132e+06	5.64642e+06	5.23415e+06	4.52587e+06	2.82254e+06	3.30227e+06	6.0329e+06	1.59969e+06	1.05296e+06	1.36726e+06	1.8273e+06	1.7699e+06	2.58346e+06	2.22286e+06	4.16281e+06	3.03519e+06	3.40978e+06	4.31716e+06	4.39499e+06	1.44592e+06	1.44629e+06	1.14065e+06	1.44468e+06	1.43758e+06	1.34431e+06	C00611	HMDB0001542	9800166	32181-59-2	16153	4231	-
MEDN0210	1,5-Anhydro-D-Glucitol	1,5-酐-D-山梨糖醇	Carbohydrates and Its metabolites	碳水化合物及其代谢物	Sugar alcohols	糖醇	163.1	164.069	[M-H]-	C6H12O5	142782	123824	185495	165784	196477	58472.7	211004	149010	108819	74030.6	88898.4	162419	63779.4	62930.4	41530.6	91774.3	89626.8	83038.6	96465.3	209670	89737.1	103474	194168	101624	68646.8	66907.7	68656.4	65499.7	69934.6	65473	C07326	HMDB0002712	64960	154-58-5	16070	3775	-
MEDN1011	D-Mannitol	D-甘露醇	Carbohydrates and Its metabolites	碳水化合物及其代谢物	Sugar alcohols	糖醇	181.1	182.079	[M-H]-	C6H14O6	29753.6	48080.3	14620.1	52705.5	44875.9	28902.1	36571.6	30600	28902.1	27602.2	39812.8	29751.1	59205.9	32961.8	35788.3	44572.2	51103.1	42109.7	24753.6	74259.3	15612.3	38653.7	62806	59276.1	38254.9	36104.1	36420.6	37082.3	37673.1	37688.3	C00392	HMDB0000765	6251	69-65-8	16899	142	ko00051,ko01100,ko02010
MEDN0213	D-Sorbitol	D-山梨糖醇	Carbohydrates and Its metabolites	碳水化合物及其代谢物	Sugar alcohols	糖醇	181.1	182.079	[M-H]-	C6H14O6	29753.6	48080.3	14620.1	52705.5	44875.9	28902.1	36571.6	30600	28902.1	27602.2	39812.8	29751.1	59205.9	32961.8	35788.3	44572.2	51103.1	42109.7	24753.6	74259.3	15612.3	38653.7	62806	59276.1	38254.9	36104.1	36420.6	37082.3	37673.1	37688.3	C00794	HMDB0000247	5780	50-70-4	-	-	ko00051,ko00052,ko01100,ko02010,ko05415
MEDN0120	Dulcitol	己六醇	Carbohydrates and Its metabolites	碳水化合物及其代谢物	Sugar alcohols	糖醇	181.1	182.079	[M-H]-	C6H14O6	29753.6	48080.3	14620.1	52705.5	44875.9	28902.1	36571.6	30600	28902.1	27602.2	39812.8	29751.1	59205.9	32961.8	35788.3	44572.2	51103.1	42109.7	24753.6	74259.3	15612.3	38653.7	62806	59276.1	38254.9	36104.1	36420.6	37082.3	37673.1	37688.3	C01697	HMDB0000107	11850	608-66-2	16813	5148	ko00052,ko01100
MEDN1538	GalactinolHydrate	肌醇半乳糖苷二水合物	Carbohydrates and Its metabolites	碳水化合物及其代谢物	Sugar alcohols	糖醇	341.1	342.116	[M-H]-	C12H22O11	3.8648e+06	6.38705e+06	2.42786e+06	3.19536e+06	2.84387e+06	4.31318e+06	3.73026e+06	4.54643e+06	3.81115e+06	5.2302e+06	4.1637e+06	4.9291e+06	5.57715e+06	5.35177e+06	5.30388e+06	5.3909e+06	5.7512e+06	4.66986e+06	7.33227e+06	1.03908e+07	5.76531e+06	6.01405e+06	7.67631e+06	6.69129e+06	4.56841e+06	4.56743e+06	4.65982e+06	4.71435e+06	4.57437e+06	4.57312e+06	C01235	HMDB0005826	439451	3687-64-7	17505	-	ko00052,ko01100
MEDN0808	Myoinositol	肌醇	Carbohydrates and Its metabolites	碳水化合物及其代谢物	Sugar alcohols	糖醇	179.1	180.16	[M-H]-	C6H12O6	4.66674e+06	1.84947e+06	3.22654e+06	3.21085e+06	3.75135e+06	3.37376e+06	4.62122e+06	3.55342e+06	4.58815e+06	3.29935e+06	3.44553e+06	4.21485e+06	6.81126e+06	4.64702e+06	3.1743e+06	2.82562e+06	3.32585e+06	3.74714e+06	4.47618e+06	5.86928e+06	3.94336e+06	5.15069e+06	7.86241e+06	5.76922e+06	3.19322e+06	3.15281e+06	3.17912e+06	3.18385e+06	3.20772e+06	3.13372e+06	C00137	HMDB0000211	892	87-89-8	17268	5221	ko00052,ko00053,ko00562,ko01100,ko01250,ko02010,ko04070
MEDN1108	1,6-anhydro-β-D-glucose	1,6-脱水-β-D-葡萄糖	Carbohydrates and Its metabolites	碳水化合物及其代谢物	Sugars	糖类	161	162.053	[M-H]-	C6H10O5	3.06283e+06	6.58227e+06	1.70689e+06	3.80891e+06	1.90682e+06	2.68159e+06	4.57126e+06	4.39728e+06	3.27539e+06	5.32e+06	3.81376e+06	3.82656e+06	8.4906e+06	4.96379e+06	3.97514e+06	5.0464e+06	4.07334e+06	5.17864e+06	8.46065e+06	1.52366e+07	8.67307e+06	1.47188e+07	1.53671e+07	1.29671e+07	4.13422e+06	4.32026e+06	4.32029e+06	4.40804e+06	4.14149e+06	4.40194e+06	-	HMDB0000640	724705	498-07-7	30997	5613	-
MEDN0539	3'-Sialyllactose	3'-唾液乳糖	Carbohydrates and Its metabolites	碳水化合物及其代谢物	Sugars	糖类	632.2	633.212	[M-H]-	C23H39NO19	1.59936e+06	5.04894e+06	1.95789e+06	1.82781e+06	5.3421e+06	2.29606e+06	8.6386e+07	1.37651e+08	9.0093e+07	9.66544e+07	5.77485e+07	9.02001e+07	5.89762e+07	1.64015e+07	2.54429e+07	3.65364e+07	3.89274e+07	5.64706e+07	9.96901e+07	1.67342e+08	9.15087e+07	1.08021e+08	1.94318e+08	1.53714e+08	3.87778e+07	3.8892e+07	3.87143e+07	3.86328e+07	3.86248e+07	3.89712e+07	-	HMDB0000825	123914	35890-38-1	-	5788	-
MEDN1947	6'-Sialyllactose	6'-唾液乳糖	Carbohydrates and Its metabolites	碳水化合物及其代谢物	Sugars	糖类	632.2	633.212	[M-H]-	C23H39NO19	1.59936e+06	5.04894e+06	1.95789e+06	1.82781e+06	5.3421e+06	2.29606e+06	8.6386e+07	1.37651e+08	9.0093e+07	9.66544e+07	5.77485e+07	9.02001e+07	5.89762e+07	1.64015e+07	2.54429e+07	3.65364e+07	3.89274e+07	5.64706e+07	9.96901e+07	1.67342e+08	9.15087e+07	1.08021e+08	1.94318e+08	1.53714e+08	3.87778e+07	3.8892e+07	3.87143e+07	3.86328e+07	3.86248e+07	3.89712e+07	-	-	9963743	157574-76-0	-	-	-
MEDN2101	Aldehydo-D-altrose	（2S，3R，4R，5R）-2,3,4,5,6-五羟基己醛	Carbohydrates and Its metabolites	碳水化合物及其代谢物	Sugars	糖类	179.1	180.064	[M-H]-	C6H12O6	4.66674e+06	1.84947e+06	3.22654e+06	3.21085e+06	3.75135e+06	3.37376e+06	4.62122e+06	3.55342e+06	4.58815e+06	3.29935e+06	3.44553e+06	4.21485e+06	6.81126e+06	4.64702e+06	3.1743e+06	2.82562e+06	3.32585e+06	3.74714e+06	4.47618e+06	5.86928e+06	3.94336e+06	5.15069e+06	7.86241e+06	5.76922e+06	3.19322e+06	3.15281e+06	3.17912e+06	3.18385e+06	3.20772e+06	3.13372e+06	-	-	94780	1990-29-0	-	-	-
MEDN1762	D-Allose	D-阿洛糖	Carbohydrates and Its metabolites	碳水化合物及其代谢物	Sugars	糖类	179.1	180.16	[M-H]-	C6H12O6	4.66674e+06	1.84947e+06	3.22654e+06	3.21085e+06	3.75135e+06	3.37376e+06	4.62122e+06	3.55342e+06	4.58815e+06	3.29935e+06	3.44553e+06	4.21485e+06	6.81126e+06	4.64702e+06	3.1743e+06	2.82562e+06	3.32585e+06	3.74714e+06	4.47618e+06	5.86928e+06	3.94336e+06	5.15069e+06	7.86241e+06	5.76922e+06	3.19322e+06	3.15281e+06	3.17912e+06	3.18385e+06	3.20772e+06	3.13372e+06	-	-	439507	2595-97-3	-	-	-
MEDP0224	D-Fructose	D-果糖	Carbohydrates and Its metabolites	碳水化合物及其代谢物	Sugars	糖类	181	180.063	[M+H]+	C6H12O6	7.07972e+06	5.3907e+06	8.6347e+06	1.51856e+07	1.45914e+07	1.60497e+07	5.16277e+07	3.29759e+07	1.90603e+07	1.67125e+07	3.01049e+07	3.80173e+07	1.62996e+07	1.60325e+07	1.61783e+07	1.46013e+07	2.04265e+07	1.95874e+07	4.60979e+07	6.91726e+07	39011967	5.71537e+07	3.84097e+07	28094196	1.83725e+07	1.91431e+07	1.80026e+07	1.76275e+07	1.88938e+07	1.89524e+07	C10906	HMDB0062538	5984	57-48-7	48095	-	-
MEDN0220	D-Glucose	D-葡萄糖	Carbohydrates and Its metabolites	碳水化合物及其代谢物	Sugars	糖类	179.1	180.063	[M-H]-	C6H12O6	4.66674e+06	1.84947e+06	3.22654e+06	3.21085e+06	3.75135e+06	3.37376e+06	4.62122e+06	3.55342e+06	4.58815e+06	3.29935e+06	3.44553e+06	4.21485e+06	6.81126e+06	4.64702e+06	3.1743e+06	2.82562e+06	3.32585e+06	3.74714e+06	4.47618e+06	5.86928e+06	3.94336e+06	5.15069e+06	7.86241e+06	5.76922e+06	3.19322e+06	3.15281e+06	3.17912e+06	3.18385e+06	3.20772e+06	3.13372e+06	C00031	HMDB0000122	5793	50-99-7	4167	133	ko00010,ko00030,ko00052,ko00500,ko00520,ko00524,ko01100,ko02010,ko04066,ko04068,ko04152,ko04742,ko04910,ko04911,ko04917,ko04922,ko04930,ko04931,ko04932,ko04933,ko04973,ko04976,ko04978,ko05230,ko05415
MEDP2343	D-Maltopentaose	麦芽五糖	Carbohydrates and Its metabolites	碳水化合物及其代谢物	Sugars	糖类	829.3	828.275	[M+H]+	C30H52O26	28575.5	37752.6	27339.8	79868.7	104732	113478	32212.8	63095.4	169178	61760.6	71966.1	50114.2	27559.7	167507	59864	197031	100253	57788.1	399233	49519.4	64924.9	19364.4	53067	41270.3	66329.4	63536.1	63490.3	66258.2	60143.5	61392.5	-	HMDB0012254	124005	34620-76-3	61952	-	-
MEDN0221	D-Mannose	D-甘露糖	Carbohydrates and Its metabolites	碳水化合物及其代谢物	Sugars	糖类	179.1	180.063	[M-H]-	C6H12O6	4.66674e+06	1.84947e+06	3.22654e+06	3.21085e+06	3.75135e+06	3.37376e+06	4.62122e+06	3.55342e+06	4.58815e+06	3.29935e+06	3.44553e+06	4.21485e+06	6.81126e+06	4.64702e+06	3.1743e+06	2.82562e+06	3.32585e+06	3.74714e+06	4.47618e+06	5.86928e+06	3.94336e+06	5.15069e+06	7.86241e+06	5.76922e+06	3.19322e+06	3.15281e+06	3.17912e+06	3.18385e+06	3.20772e+06	3.13372e+06	C00159	HMDB0000169	18950	3458-28-4	4208	-	ko00051,ko00052,ko00520,ko01100,ko01250,ko02010,ko04142,ko04625
MEDN1955	D-Saccharic Acid 1,4-lactone (hydrate)	D-蔗糖1,4-内酯（水合物）	Carbohydrates and Its metabolites	碳水化合物及其代谢物	Sugars	糖类	191	192.12	[M-H]-	C6H8O7	5.73459e+07	6.74976e+07	7.37013e+07	7.61004e+07	4.97306e+07	6.57911e+07	2.25376e+08	1.92429e+08	1.72514e+08	165069756	2.05918e+08	2.31326e+08	4.08195e+07	8.24318e+07	9.09368e+07	9.11307e+07	5.66377e+07	7.15526e+07	1.58619e+08	1.49654e+08	1.45555e+08	1.46987e+08	1.48836e+08	9.75781e+07	9.94127e+07	9.77224e+07	9.94153e+07	9.86699e+07	9.96758e+07	9.94573e+07	C21095	-	20055579	61278-30-6	-	-	-
MEDN1534	D-Tagatose	D-塔格糖	Carbohydrates and Its metabolites	碳水化合物及其代谢物	Sugars	糖类	179.1	180.063	[M-H]-	C6H12O6	4.66674e+06	1.84947e+06	3.22654e+06	3.21085e+06	3.75135e+06	3.37376e+06	4.62122e+06	3.55342e+06	4.58815e+06	3.29935e+06	3.44553e+06	4.21485e+06	6.81126e+06	4.64702e+06	3.1743e+06	2.82562e+06	3.32585e+06	3.74714e+06	4.47618e+06	5.86928e+06	3.94336e+06	5.15069e+06	7.86241e+06	5.76922e+06	3.19322e+06	3.15281e+06	3.17912e+06	3.18385e+06	3.20772e+06	3.13372e+06	C00795	HMDB0003418	439312	87-81-0	49092	-	ko00052,ko01100
MEDN1761	D-Talose	D-塔罗糖	Carbohydrates and Its metabolites	碳水化合物及其代谢物	Sugars	糖类	179.1	180.16	[M-H]-	C6H12O6	4.66674e+06	1.84947e+06	3.22654e+06	3.21085e+06	3.75135e+06	3.37376e+06	4.62122e+06	3.55342e+06	4.58815e+06	3.29935e+06	3.44553e+06	4.21485e+06	6.81126e+06	4.64702e+06	3.1743e+06	2.82562e+06	3.32585e+06	3.74714e+06	4.47618e+06	5.86928e+06	3.94336e+06	5.15069e+06	7.86241e+06	5.76922e+06	3.19322e+06	3.15281e+06	3.17912e+06	3.18385e+06	3.20772e+06	3.13372e+06	-	-	99459	2595-98-4	-	-	-
MEDN0224	D-Trehalose	D-海藻糖	Carbohydrates and Its metabolites	碳水化合物及其代谢物	Sugars	糖类	341.1	342.116	[M-H]-	C12H22O11	1.10702e+06	1.05529e+06	1.29062e+06	1.99102e+06	1.66187e+06	1.5085e+06	2.73661e+06	1.89428e+06	1.55425e+06	1.13663e+06	1.50176e+06	2.03714e+06	1.01087e+06	966408	942801	1.05534e+06	1.07033e+06	1.17223e+06	1.12623e+06	1.94436e+06	1.19446e+06	1.76361e+06	1.53164e+06	1.67273e+06	1.0504e+06	1.01525e+06	1.04822e+06	1.06023e+06	1.05333e+06	1.00564e+06	C01083	HMDB0000975	7427	99-20-7	16551	5913	ko00500,ko01100,ko02010
MEDN1760	D-cellobiose	D-纤维二糖	Carbohydrates and Its metabolites	碳水化合物及其代谢物	Sugars	糖类	341.1	342.116	[M-H]-	C12H22O11	5.30431e+06	7.38213e+06	3.72802e+06	4.19771e+06	4.30739e+06	6.25787e+06	5.87292e+06	6.71401e+06	5.07559e+06	9.01779e+06	5.95884e+06	8.12657e+06	8.63979e+06	7.81508e+06	8.40998e+06	7.11557e+06	8.24648e+06	8.45292e+06	8.94776e+06	1.17393e+07	8.87202e+06	7.88572e+06	1.28938e+07	1.02058e+07	6.79902e+06	6.80066e+06	6.88484e+06	6.8876e+06	6.67795e+06	6.88424e+06	C06422	HMDB0000055	10712	528-50-7	36217	3480	-
MEDN1935	D-ribonate lithium salt	D-核糖酸锂盐	Carbohydrates and Its metabolites	碳水化合物及其代谢物	Sugars	糖类	165	166.13	[M-H]-	C5H10O6	163945	438281	275888	343880	221615	245523	125080	190496	117496	314681	122196	150674	69527.3	84274.4	153298	93001.1	126572	72374.3	104700	195446	65648.1	96415.3	128958	107777	283935	286561	286095	288513	278442	288140	C01685	HMDB0000867	5460677	642-98-8	21077	3290	-
MEDN1758	Dextrin	糊精	Carbohydrates and Its metabolites	碳水化合物及其代谢物	Sugars	糖类	503.2	504.169	[M-H]-	C18H32O16	1.20759e+06	1.44657e+06	331472	1.20777e+06	401500	1.20447e+06	1.07536e+06	1.45711e+06	788383	1.94726e+06	1.01562e+06	3.06694e+06	4.20589e+06	1.37663e+06	1.04755e+06	1.49641e+06	1.64317e+06	1.03608e+06	2.76473e+06	1.09068e+07	2.82492e+06	7.14282e+06	1.75824e+07	6.96e+06	987419	983810	922562	996419	899004	1.00345e+06	C00721	HMDB0006857	62698	9004-53-9	-	-	ko00500,ko01100
MEDN1757	Isomaltotriose	异麦芽三糖	Carbohydrates and Its metabolites	碳水化合物及其代谢物	Sugars	糖类	503.2	504.169	[M-H]-	C18H32O16	1.20759e+06	1.44657e+06	331472	1.20777e+06	401500	1.20447e+06	1.07536e+06	1.45711e+06	788383	1.94726e+06	1.01562e+06	3.06694e+06	4.20589e+06	1.37663e+06	1.04755e+06	1.49641e+06	1.64317e+06	1.03608e+06	2.76473e+06	1.09068e+07	2.82492e+06	7.14282e+06	1.75824e+07	6.96e+06	987419	983810	922562	996419	899004	1.00345e+06	C02160	-	439668	3371-50-4	-	-	ko02010
MEDN0232	L-Rhamnose	L-鼠李糖	Carbohydrates and Its metabolites	碳水化合物及其代谢物	Sugars	糖类	163.1	164.069	[M-H]-	C6H12O5	142782	123824	185495	165784	196477	58472.7	211004	149010	108819	74030.6	88898.4	162419	63779.4	62930.4	41530.6	91774.3	89626.8	83038.6	96465.3	209670	89737.1	103474	194168	101624	68646.8	66907.7	68656.4	65499.7	69934.6	65473	C00507	HMDB0000849	25310	3615-41-6	62346	5812	ko00051,ko01100
MEDN0229	Lactose	乳糖	Carbohydrates and Its metabolites	碳水化合物及其代谢物	Sugars	糖类	341.1	342.116	[M-H]-	C12H22O11	1.10702e+06	1.05529e+06	1.29062e+06	1.99102e+06	1.66187e+06	1.5085e+06	2.73661e+06	1.89428e+06	1.55425e+06	1.13663e+06	1.50176e+06	2.03714e+06	1.01087e+06	966408	942801	1.05534e+06	1.07033e+06	1.17223e+06	1.12623e+06	1.94436e+06	1.19446e+06	1.76361e+06	1.53164e+06	1.67273e+06	1.0504e+06	1.01525e+06	1.04822e+06	1.06023e+06	1.05333e+06	1.00564e+06	C00243	HMDB0000186	84571	63-42-3	36219	267	ko00052,ko01100,ko02010,ko04973
MEDN0230	Lactulose	乳果糖	Carbohydrates and Its metabolites	碳水化合物及其代谢物	Sugars	糖类	341.1	342.116	[M-H]-	C12H22O11	1.10702e+06	1.05529e+06	1.29062e+06	1.99102e+06	1.66187e+06	1.5085e+06	2.73661e+06	1.89428e+06	1.55425e+06	1.13663e+06	1.50176e+06	2.03714e+06	1.01087e+06	966408	942801	1.05534e+06	1.07033e+06	1.17223e+06	1.12623e+06	1.94436e+06	1.19446e+06	1.76361e+06	1.53164e+06	1.67273e+06	1.0504e+06	1.01525e+06	1.04822e+06	1.06023e+06	1.05333e+06	1.00564e+06	C07064	HMDB0000740	11333	4618-18-2	6359	916	-
MEDN0233	Maltose	麦芽糖	Carbohydrates and Its metabolites	碳水化合物及其代谢物	Sugars	糖类	341.1	342.116	[M-H]-	C12H22O11	1.10702e+06	1.05529e+06	1.29062e+06	1.99102e+06	1.66187e+06	1.5085e+06	2.73661e+06	1.89428e+06	1.55425e+06	1.13663e+06	1.50176e+06	2.03714e+06	1.01087e+06	966408	942801	1.05534e+06	1.07033e+06	1.17223e+06	1.12623e+06	1.94436e+06	1.19446e+06	1.76361e+06	1.53164e+06	1.67273e+06	1.0504e+06	1.01525e+06	1.04822e+06	1.06023e+06	1.05333e+06	1.00564e+06	C00208	HMDB0000163	10991489	69-79-4	47937	413	ko00500,ko01100,ko02010,ko04742,ko04973
MEDP0067	N-Acetylmannosamine	N-乙酰-D-甘露糖胺	Carbohydrates and Its metabolites	碳水化合物及其代谢物	Sugars	糖类	222	221.09	[M+H]+	C8H15NO6	41251.2	29468.7	56575.9	139022	131589	72429.8	446526	372813	288564	213640	305486	369250	36072.9	64107.1	71151.2	5.22328	82419.6	73027.5	1.30129e+06	1.78467e+06	424703	171293	1.91552e+06	1.97644e+06	291841	274055	290166	274806	287978	288074	C00645	HMDB0001129	11096158	3615-17-6	63154	6024	ko00520,ko01100,ko01250
MEDN1087	UDP-D-galactose	UDP-D-半乳糖	Carbohydrates and Its metabolites	碳水化合物及其代谢物	Sugars	糖类	565	566.055	[M-H]-	C15H24N2O17P2	5.44142e+07	5.15322e+07	5.32029e+07	5.49751e+07	5.17727e+07	5.18685e+07	34080.4	42240.1	40531.9	15747.5	29908.8	14724.7	6.71564e+07	7.7026e+07	6.85122e+07	6.1562e+07	4.86847e+07	5.90701e+07	45773	17089.8	81379.3	27650.1	32583.2	27689.3	3.90922e+07	3.90913e+07	3.92584e+07	3.92183e+07	3.92179e+07	3.90388e+07	C00052	HMDB0000302	18068	2956-16-3	67119	5291	ko00052,ko00520,ko01100,ko01250
MEDN0538	UDP-glucose	UDP-葡萄糖	Carbohydrates and Its metabolites	碳水化合物及其代谢物	Sugars	糖类	565	566.055	[M-H]-	C15H24N2O17P2	5.44142e+07	5.15322e+07	5.32029e+07	5.49751e+07	5.17727e+07	5.18685e+07	34080.4	42240.1	40531.9	15747.5	29908.8	14724.7	6.71564e+07	7.7026e+07	6.85122e+07	6.1562e+07	4.86847e+07	5.90701e+07	45773	17089.8	81379.3	27650.1	32583.2	27689.3	3.90922e+07	3.90913e+07	3.92584e+07	3.92183e+07	3.92179e+07	3.90388e+07	C00029	HMDB0000286	5278	133-89-1	46229	-	ko00040,ko00052,ko00053,ko00500,ko00520,ko00524,ko00561,ko01100,ko01240,ko01250
MEDN1631	UDP-xylose	UDP-木糖	Carbohydrates and Its metabolites	碳水化合物及其代谢物	Sugars	糖类	535	536.044	[M-H]-	C14H22N2O16P2	3.04899e+06	3.03989e+06	3.56213e+06	3.16028e+06	3.41448e+06	2.72404e+06	0.895847	0.895847	0.895847	0.895847	0.895847	0.895847	4.75396e+06	4.75982e+06	4.29535e+06	3.92944e+06	4.79964e+06	4.30567e+06	12.1612	12.1612	12.1612	12.1612	12.1612	12.1612	2.34745e+06	2.35348e+06	2.36398e+06	2.3691e+06	2.36878e+06	2.34067e+06	C00190	HMDB0001018	19235	3616-06-6	16082	5948	ko00520,ko01100,ko01250
MEDP1844	alpha-D-Glucopyranoside,-beta-D-fructofuranosyl	β-D-呋喃果糖基-α-D-吡喃葡萄糖苷	Carbohydrates and Its metabolites	碳水化合物及其代谢物	Sugars	糖类	343.1	342.116	[M+H]+	C12H22O11	1.16957e+06	1.38573e+06	1.32184e+06	1.89648e+06	2.02272e+06	1.22618e+06	1.00107e+06	1.47112e+06	1.01465e+06	1.20661e+06	1.25895e+06	841826	1.34142e+06	925156	711156	1.39287e+06	1.4243e+06	1.08321e+06	1.2994e+06	969748	801489	802516	786402	1.23887e+06	1.29759e+06	1.32404e+06	1.2972e+06	1.31188e+06	1.29211e+06	1.32742e+06	-	-	1115	1192061-43-0	-	-	-
MEDN1943	2-keto-D-gluconic acid	2-酮-D-葡萄糖酸	Carbohydrates and Its metabolites	碳水化合物及其代谢物	Sugar acids	糖酸	193	194.043	[M-H]-	C6H10O7	130737	244667	239619	98015.7	168302	151031	513852	428348	497216	437383	361285	629895	248627	126648	215555	141824	207951	193173	1.35663e+06	4.8738e+06	1.14114e+06	560064	2.21324e+06	1.7196e+06	401082	397667	401140	396050	395841	402534	C06473	-	3035456	669-90-9	-	-	ko00030,ko01100
MEDN1532	D-Galacturonic Acid	半乳糖醛酸	Carbohydrates and Its metabolites	碳水化合物及其代谢物	Sugar acids	糖酸	193	194.043	[M-H]-	C6H10O7	174252	121155	172028	180013	134982	205269	805396	474964	634901	574977	536236	715407	213657	201690	193493	104530	147129	111409	1.12101e+06	4.03971e+06	1.02358e+06	602256	1.84776e+06	1.53302e+06	350935	349560	351086	352094	349815	349813	C00333	HMDB0002545	439215	685-73-4	47962	6713	ko00040,ko00053,ko00520,ko01100,ko01240,ko01250,ko02010
MEDN0239	D-Gluconic Acid	葡萄糖酸	Carbohydrates and Its metabolites	碳水化合物及其代谢物	Sugar acids	糖酸	195.1	196.058	[M-H]-	C6H12O7	417763	445073	557342	757677	1.14469e+06	221184	783283	920981	733719	364293	559747	962643	300470	273947	200822	345635	476092	146047	1.24837e+06	2.33862e+06	694182	242016	1.37976e+06	1.43701e+06	433226	427923	434926	428746	434284	428897	C00257	HMDB0000625	10690	526-95-4	33198	345	ko00030,ko01100,ko01200
MEDN0237	D-Glucoronic Acid	葡萄糖醛酸	Carbohydrates and Its metabolites	碳水化合物及其代谢物	Sugar acids	糖酸	193	194.043	[M-H]-	C6H10O7	115560	48408	64491.7	106550	147851	63766.7	735690	264987	552769	152341	231606	807349	137607	103179	82021	69932.2	96673	77341.8	1.02876e+06	4.50709e+06	799620	291105	1.36642e+06	1.30811e+06	242538	251480	251642	238674	260788	238553	-	HMDB0000127	65041	6556-12-3	42717	161	-
MEDN2102	L-rhamnonic acid	L-鼠李糖酸	Carbohydrates and Its metabolites	碳水化合物及其代谢物	Sugar acids	糖酸	179.1	180.063	[M-H]-	C6H12O6	43157.1	51101.9	56778.8	68129.1	77205.5	68135.9	46559.1	44348.7	48777.5	56073.9	34509	52105.4	33349.4	32121	133293	19581.4	33353.1	9881.7	26074.1	42714.7	25673.5	17623.5	26117	24974.6	47197.5	47956.9	47955.2	46772.4	48444.5	46939.3	C01934	-	6602429	6422-34-0	-	-	ko00051,ko01100
MEDN2150	2-O-α-D-glucopyranosyl-L-ascorbic acid	2-O-α-D-吡喃葡萄糖基-L-抗坏血酸	Carbohydrates and Its metabolites	碳水化合物及其代谢物	Sugar derivatives	糖衍生物	337.1	338.085	[M-H]-	C12H18O11	14566.1	8.8374	12250.2	12742.6	22755.4	14205.9	24555.4	8.8374	12279.1	32780	10928.5	20934.6	20723.4	16939.2	14646.3	32500.4	19681.2	12358	4.46797	4.46797	4.46797	4.46797	4.46797	4.46797	15649.5	16753.5	16635.9	16649.5	14217.1	16662.5	C18339	-	54693473	129499-78-1	-	-	-
MEDP0232	N-Acetyl-D-Glucosamine	N-乙酰氨基葡萄糖	Carbohydrates and Its metabolites	碳水化合物及其代谢物	Sugar derivatives	糖衍生物	222	221.09	[M+H]+	C8H15NO6	41251.2	29468.7	56575.9	139022	131589	72429.8	446526	372813	288564	213640	305486	369250	36072.9	64107.1	71151.2	5.22328	82419.6	73027.5	1.30129e+06	1.78467e+06	424703	171293	1.91552e+06	1.97644e+06	291841	274055	290166	274806	287978	288074	C00140	HMDB0000215	439174	7512-17-6	506227	3356	ko00520,ko01100,ko01250,ko02010
MEDP1419	Carnitine C10:0	肉碱 C10:0	FA	脂肪酰类	CAR	酰基肉碱	316.2	315.241	[M+H]+	C17H33NO4	34810	27673.7	82312.5	47528.6	48926.2	29108.9	165100	144903	127739	224218	67723.9	157621	225054	321061	130665	119645	660354	212820	18918.7	9035.69	7211.68	11804.2	10713.1	6241.36	83339.4	82840.2	83334.1	83474.4	82127.5	83486.3	-	-	-	-	-	-	-
MEDP1397	Carnitine C16:0	肉碱 C16:0	FA	脂肪酰类	CAR	酰基肉碱	400.3	399.335	[M+H]+	C23H45NO4	139596	65444	40772.6	114470	226242	57944.5	33226.6	48684.2	18313.6	49863.3	7517.03	24484.3	127268	63631.5	42437.9	29976.2	508062	37294.2	15513	7195.23	5311.44	10652.9	11319.3	11813.9	65906.6	65898.6	66891.8	68226.8	62487.7	68075.4	C02990	-	-	-	-	-	ko00071,ko01212
MEDP1389	Carnitine C18:0	肉碱 C18:0	FA	脂肪酰类	CAR	酰基肉碱	428.3	427.366	[M+H]+	C25H49NO4	104618	51926.5	45754.7	107756	175217	63204.7	61833.7	59612	72274.4	119439	44760.7	51519.4	335772	130925	78356.9	41586.4	310438	129838	34031.5	25095	30803.9	50761.3	56913.3	34864.9	65305.3	62115.8	65271.7	64481.7	65784.4	64483.4	-	-	-	-	-	-	-
MEDP1387	Carnitine C19:2	肉碱 C19:2	FA	脂肪酰类	CAR	酰基肉碱	438.4	437.351	[M+H]+	C26H47NO4	348898	383792	410105	325045	401133	341510	388718	411711	349233	336018	376784	370809	458276	390934	390293	423940	223303	333445	357778	440658	571628	467429	341432	219552	352413	376116	375812	366209	373830	366077	-	-	-	-	-	-	-
MEDP1373	Carnitine C22:2	肉碱 C22:2	FA	脂肪酰类	CAR	酰基肉碱	480.4	479.397	[M+H]+	C29H53NO4	4116.76	2523.97	4043.5	2596.04	2090.98	3196.91	13631.7	10972.2	10162.5	8514	8466.14	12425.8	1553.44	1663.35	2585.67	2411.82	2668.36	3496.59	2400.88	1.49336	1957.91	1.49346	3254.97	4192.26	23118.4	23416.3	23118.4	23279.2	23162.3	23049	-	-	-	-	-	-	-
MEDP0510	Carnitine C2:0	乙酰肉碱	FA	脂肪酰类	CAR	酰基肉碱	204.1	203.116	[M+H]+	C9H17NO4	4.24933e+08	4.1688e+08	4.65374e+08	4.96786e+08	5.3629e+08	5.38798e+08	6.61205e+08	6.29733e+08	6.42583e+08	676697033	6.90103e+08	6.99772e+08	8.25263e+08	581438800	4.97475e+08	5.9738e+08	621824686	7.55256e+08	5.11788e+08	3.64604e+08	5.52998e+08	9.75228e+08	6.31848e+08	4.84653e+08	5.36259e+08	5.69319e+08	5.37634e+08	546350492	5.54195e+08	5.49017e+08	C02571	HMDB0000201	1	14992-62-2	57589	-	ko04931
MEDP1665	Carnitine C3:0	丙酰肉碱	FA	脂肪酰类	CAR	酰基肉碱	218.1	217.131	[M+H]+	C10H19NO4	3.04424e+08	2.08369e+08	357418250	1.86091e+08	2.91296e+08	1.87098e+08	1.67056e+08	1.30956e+08	1.28206e+08	1.2662e+08	1.32147e+08	1.4463e+08	2.75747e+08	2.5574e+08	2.47354e+08	2.08005e+08	3.52406e+08	355335709	141617995	1.13396e+08	2.04137e+08	1.87559e+08	123737534	1.55274e+08	193704384	1.95004e+08	1.93701e+08	1.93262e+08	1.93227e+08	1.95282e+08	C03017	HMDB0000824	107738	17298-37-2	28867	5787	-
MEDP1442	Carnitine C4:0	肉碱 C4:0	FA	脂肪酰类	CAR	酰基肉碱	232.2	231.147	[M+H]+	C11H21NO4	3.10317e+08	3.57187e+08	4.56979e+08	2.83533e+08	5.22452e+08	4.1629e+08	3.2184e+08	415550356	3.17283e+08	279441465	1.94683e+08	2.61229e+08	7.84204e+08	3.59155e+08	3.63561e+08	5.49161e+08	840465125	7.23752e+08	2.5097e+08	1.67274e+08	2.7489e+08	9.0843e+08	4.27551e+08	1.71017e+08	3.22739e+08	3.24216e+08	3.22748e+08	3.23205e+08	323193638	3.24034e+08	-	HMDB0002013	-	-	21949	6436	-
MEDP1434	Carnitine C4:DC	肉碱 C4:DC	FA	脂肪酰类	CAR	酰基肉碱	262.1	261.121	[M+H]+	C11H19NO6	2.44433e+07	1.94552e+07	1.98251e+07	22600416	6.38602e+07	2.65851e+07	1.78153e+07	1.39462e+07	1.52867e+07	1.73522e+07	1.59786e+07	1.51522e+07	3.53854e+07	3.65983e+07	3.52759e+07	2.99888e+07	3.63594e+07	2.88252e+07	1.20051e+07	8.40054e+06	1.21847e+07	1.45718e+07	1.63329e+07	1.10023e+07	2.02735e+07	2.02735e+07	2.02618e+07	20182880	20185186	2.04052e+07	-	-	-	-	-	-	-
MEDP1440	Carnitine C5:0	肉碱-C5:0	FA	脂肪酰类	CAR	酰基肉碱	246.2	245.163	[M+H]+	C12H23NO4	2.18652e+08	2.39138e+08	2.45426e+08	200464682	1.89795e+08	2.42537e+08	2.74202e+08	2.60819e+08	2.09204e+08	2.14458e+08	1.58385e+08	234784724	3.73644e+08	4.05924e+08	3.3803e+08	4.24164e+08	3.9258e+08	6.47601e+08	1.10425e+08	8.73258e+07	1.49061e+08	2.32719e+08	2.39773e+08	8.4716e+07	1.99864e+08	2.01133e+08	2.01137e+08	200762641	2.00844e+08	2.00844e+08	-	-	-	-	-	-	-
MEDP1441	Carnitine C5:1	肉碱 C5:1	FA	脂肪酰类	CAR	酰基肉碱	244.2	243.147	[M+H]+	C12H21NO4	7.92221e+06	6.41528e+06	7.5068e+06	3.75333e+06	6.80536e+06	4.46064e+06	7.28123e+06	7.59443e+06	8.57179e+06	8.46643e+06	5.8596e+06	8.77173e+06	9.15787e+06	8.10924e+06	4.71986e+06	6.98806e+06	1.38879e+07	5.64451e+06	5.4576e+06	6.65464e+06	5.18336e+06	9.35531e+06	1.01e+07	6.90965e+06	5.25616e+06	5.71257e+06	5556294	5.62644e+06	5.53306e+06	5.53233e+06	-	HMDB0002366	-	-	85520	-	-
MEDP1429	Carnitine C5:DC	肉碱 C5:DC	FA	脂肪酰类	CAR	酰基肉碱	276.2	275.137	[M+H]+	C12H21NO6	40769.1	41347.5	39803.9	1.71079	33671.6	12695.1	106345	115924	156029	112162	138922	114442	44405.4	15.3187	15.3187	14336.5	66513.6	18278	93807.5	49091.8	92718.1	473196	108770	61694.4	48204.7	67556.7	67837.9	64687.8	64705.1	66177	-	-	-	-	-	-	-
MEDP1289	Carnitine C6:0	肉碱-C6:0	FA	脂肪酰类	CAR	酰基肉碱	260.2	259.178	[M+H]+	C13H25NO4	5.20726e+06	3.62966e+06	5.03469e+06	2.90974e+06	4.56626e+06	2.56505e+06	1.42866e+06	1.62651e+06	2.53302e+06	1.97586e+06	1.52354e+06	1.56725e+06	5.75358e+06	5.19663e+06	3.26044e+06	3.4899e+06	1.20138e+07	3.80402e+06	1.70974e+06	890872	1.28125e+06	3.23808e+06	1.45421e+06	908801	2.54896e+06	2.54898e+06	2.52214e+06	2.5877e+06	2.53121e+06	2.53065e+06	-	HMDB0000705	6426853	6418-78-6	70749	5673	-
MEDP1430	Carnitine C7:0	肉碱 C7:0	FA	脂肪酰类	CAR	酰基肉碱	274.2	273.194	[M+H]+	C14H27NO4	221607	57196.6	140710	70291.7	186084	76788	38586.6	35010.5	50852.5	49294.2	28935.7	28400.3	62863.6	98397.8	74747.7	74913.8	120254	181015	17590.2	7055.87	13157.1	18617.2	14333.4	9952.74	56894	56358.5	56893.5	56017.9	55979.7	60055.6	-	-	-	-	-	-	-
MEDP1432	Carnitine C7:1	肉碱 C7:1	FA	脂肪酰类	CAR	酰基肉碱	272.2	271.178	[M+H]+	C14H25NO4	33838.2	24471.1	26166.4	31988.2	25475	21641.2	1.28523e+06	956793	2.24244e+06	934595	1.10407e+06	1.05664e+06	24410.9	43303.9	51375.6	43750.2	29211.4	50265.5	2.79622e+06	1.82125e+06	4.48438e+06	5.2491e+06	2.11431e+06	2.94675e+06	658507	666017	658411	668604	652778	666889	-	-	-	-	-	-	-
MEDP1422	Carnitine C8-OH	肉碱 C8-OH	FA	脂肪酰类	CAR	酰基肉碱	304.2	303.205	[M+H]+	C15H29NO5	350460	61690	110938	132752	964223	133028	158013	103003	124391	213197	101331	228092	310918	202728	93041	146515	1.09593e+06	137033	111427	51668	66257.1	249078	118009	74966.8	154221	151220	151053	151831	151444	153543	-	-	-	-	-	-	-
MEDP1427	Carnitine C8:0	肉碱 C8:0	FA	脂肪酰类	CAR	酰基肉碱	288.1	287.21	[M+H]+	C15H29NO4	951922	662981	497668	282090	1.26833e+06	311585	255485	280324	406026	332365	213617	259729	1.47052e+06	1.3751e+06	821691	640125	2.9085e+06	1.04156e+06	270292	75086.2	98643.1	217298	165431	115472	394261	394264	393381	392767	392777	395281	-	-	-	-	-	-	-
MEDP0577	Carnitine isoC4:0	异丁酰肉碱	FA	脂肪酰类	CAR	酰基肉碱	232.1	231.147	[M+H]+	C11H21NO4	3.10317e+08	3.57187e+08	4.56979e+08	2.83533e+08	5.22452e+08	4.1629e+08	3.2184e+08	415550356	3.17283e+08	279441465	1.94683e+08	2.61229e+08	7.84204e+08	3.59155e+08	3.63561e+08	5.49161e+08	840465125	7.23752e+08	2.5097e+08	1.67274e+08	2.7489e+08	9.0843e+08	4.27551e+08	1.71017e+08	3.22739e+08	3.24216e+08	3.22748e+08	3.23205e+08	323193638	3.24034e+08	-	HMDB0000736	10177002	25518-49-4	84838	5704	-
MEDP1433	Carnitine ph-C1	肉碱 ph-C1	FA	脂肪酰类	CAR	酰基肉碱	266.1	265.131	[M+H]+	C14H19NO4	1.72679e+06	1.49267e+06	2.6983e+06	2.87656e+06	1.81789e+06	2.16465e+06	4.39054e+06	3.84007e+06	6.32071e+06	4.3491e+06	4.21802e+06	5.62064e+06	1.42298e+06	2.28381e+06	1.91887e+06	2.98935e+06	1.66619e+06	1.55883e+06	8.86373e+06	6.61155e+06	1.46704e+07	1.04011e+07	7.58983e+06	8.01457e+06	2.48603e+06	2.4752e+06	2.48608e+06	2.49293e+06	2.46891e+06	2.48011e+06	-	-	-	-	-	-	-
MEDP0618	Carnitine-2-methyl-C4	2-甲基丁酰肉碱	FA	脂肪酰类	CAR	酰基肉碱	246.2	245.163	[M+H]+	C12H23NO4	2.18652e+08	2.39138e+08	2.45426e+08	200464682	1.89795e+08	2.42537e+08	2.74202e+08	2.60819e+08	2.09204e+08	2.14458e+08	1.58385e+08	234784724	3.73644e+08	4.05924e+08	3.3803e+08	4.24164e+08	3.9258e+08	6.47601e+08	1.10425e+08	8.73258e+07	1.49061e+08	2.32719e+08	2.39773e+08	8.4716e+07	1.99864e+08	2.01133e+08	2.01137e+08	200762641	2.00844e+08	2.00844e+08	-	HMDB0000378	6426901	31023-25-3	73026	5367	-
MEDP0523	DL-Carnitine	DL-肉碱	FA	脂肪酰类	CAR	酰基肉碱	162.1	161.105	[M+H]+	C7H15NO3	3.2564e+07	7.06316e+07	1.22429e+08	1.06361e+08	3.43607e+07	7.38182e+07	9.47567e+07	8.33855e+07	8.99268e+07	7.90602e+07	7.47216e+07	1.21432e+08	6.35065e+07	1.42032e+08	115681242	1.62833e+08	7.08013e+07	1.3042e+08	5.78965e+07	6.28334e+07	70028178	4.98865e+07	8.59057e+07	5.51251e+07	6.32721e+07	5.68652e+07	6.09375e+07	6.14751e+07	6.14771e+07	6.02206e+07	C00318	HMDB0000062	2724480	541-15-1	16347	52	ko04714,ko04976,ko05415
MEDN0022	gamma-Glu-Ala	5-L-谷氨酰-L-丙氨酸	Amino acid and Its metabolites	氨基酸及其代谢物	Small Peptide	小肽	217.1	218.09	[M-H]-	C8H14N2O5	50739.6	263500	349674	181262	176264	166530	124170	99655.6	183975	125115	114178	86662.1	4.22715	4.22715	4.22715	4.22715	4.22715	4.22715	91335	275763	64372.7	113113	235902	448166	193532	194907	196406	195900	192738	195873	C03740	HMDB0006248	440103	5875-41-2	50619	-	ko00480,ko01100
MEDP2554	Ala-His	L-丙氨酸-L-组氨酸	Amino acid and Its metabolites	氨基酸及其代谢物	Small Peptide	小肽	227.1	226.107	[M+H]+	C9H14N4O3	598652	334182	218716	374294	155798	128245	126076	153564	45680.8	174214	12141.2	34613.9	207320	55275.1	49315.7	51516.7	184434	126409	108315	93357.5	62364.8	32055.8	67106.2	49631.8	252675	224770	252885	244829	243220	243717	-	HMDB0028689	9837455	3253-17-6	73771	-	-
MEDP2363	Arg-Ile	L-精氨酸-L-异亮氨酸	Amino acid and Its metabolites	氨基酸及其代谢物	Small Peptide	小肽	288.2	287.196	[M+H]+	C12H25N5O3	14106.1	21532.5	16371.2	22450.1	10594.5	13107.4	20363.7	14392.6	25988.7	21956.9	29256.8	32069.2	3871.22	2975.55	3748.64	8744.6	3557.81	3395.07	4971.89	4564.65	2458.33	2664.46	3687.68	7810.06	83359.8	93550.6	94502.8	88482.8	92662.8	92781.3	-	-	7009553	62632-70-6	-	-	-
MEDP2507	Arg-Phe	精氨酸-苯丙氨酸	Amino acid and Its metabolites	氨基酸及其代谢物	Small Peptide	小肽	322.2	321.18	[M+H]+	C15H23N5O3	0.584677	0.584677	0.584677	0.584677	0.584677	0.584677	0.584677	353.754	3058.45	1649.52	2314.86	714.959	119.275	40.5462	87.8677	71.2185	0.0823805	55.8688	250.934	91.8934	177.15	113.756	107.358	148.281	11255.6	11281.7	11462.5	11841.9	11179.9	11186.7	-	-	150964	-	-	-	-
MEDP2568	Asn-Hyp	L-天冬酰胺-L-羟脯氨酸	Amino acid and Its metabolites	氨基酸及其代谢物	Small Peptide	小肽	246.1	245.101	[M+H]+	C9H15N3O5	64881.5	60985.9	110319	77157.5	75858.3	124722	62809	67103	69433.1	42691.2	72852.5	48660	48312.2	29117.8	48206	30119.5	51853.6	47950.7	42470.2	45005.7	67807.4	56677.1	54029	67339.8	66746.6	64802.9	64779.9	63517.2	64298.8	68831.3	-	-	-	-	-	-	-
MEDP2438	Asp-Ile	天冬酰胺-异亮氨酸	Amino acid and Its metabolites	氨基酸及其代谢物	Small Peptide	小肽	247.1	246.12	[M+H]+	C10H18N2O5	21658.1	18431.6	40308.5	39942.4	25108.9	28293	21471.2	9696.3	19561.7	19627.4	16443	20150.8	4276.13	3324.33	3311.93	2214.88	4292.7	2932.38	1661.1	884.676	1921.12	2337.71	2413.37	1233.04	95965.7	96615.2	96615.7	95327.5	96895	96900.1	-	-	21845165	-	-	-	-
MEDP2428	Cyclo(Ala-Pro)	环(丙氨酸-脯氨酸)	Amino acid and Its metabolites	氨基酸及其代谢物	Small Peptide	小肽	169.1	168.09	[M+H]+	C8H12N2O2	161112	155708	174769	84358.6	28404.4	67780.5	82745.9	178707	90913	86286.4	78041.3	111235	33523.5	249213	168287	195413	104948	77519.5	612282	125859	215627	69542.1	135589	168519	201169	204326	201133	205943	190897	206843	-	-	13879951	36357-32-1	-	-	-
MEDP1923	Cyclo(Phe-Glu)	环(苯丙氨酸-谷氨酸)	Amino acid and Its metabolites	氨基酸及其代谢物	Small Peptide	小肽	277.1	276.111	[M+H]+	C14H16N2O4	8218.06	3756.5	9148.96	9505.84	20524.7	6834.1	1.49762	1.49762	1.49762	1.49762	1.49762	1.49762	6290.1	1865.72	4307.07	3075	9896.53	2599.39	3248.24	4236.94	3173.67	5458.13	4273.89	2315.13	33205.4	33668.9	33658.2	32988.7	33001.1	33864.4	-	-	-	-	-	-	-
MEDP1924	Cyclo(Pro-Glu)	环(脯氨酸-谷氨酸)	Amino acid and Its metabolites	氨基酸及其代谢物	Small Peptide	小肽	227.1	226.095	[M+H]+	C10H14N2O4	349922	298839	170225	297651	516061	285270	275018	150712	444642	317873	410751	327791	307960	179436	373609	225354	408618	208367	403034	292275	342816	734378	451978	559656	325216	311015	325123	321479	321448	318594	-	-	-	-	-	-	-
MEDP1919	Cyclo(Pro-Leu)	环(L-亮氨酸-L-脯氨酸)	Amino acid and Its metabolites	氨基酸及其代谢物	Small Peptide	小肽	211	210.137	[M+H]+	C11H18N2O2	119327	68138.1	47568.3	10204.2	2425.98	11198.9	11109.6	16234.3	17753.8	15640.3	13686.9	13351.2	7.09451	33818.3	21213.2	7.09451	27181.6	18921	102747	82265.3	88653.6	103086	76979.9	68923.8	42647.5	41456.3	41129.3	41267.4	42928.6	41400.2	-	HMDB0034276	102892	2873-36-1	133094	-	-
MEDP1928	Cyclo(Pro-Val)	环(脯氨酸-缬氨酸)	Amino acid and Its metabolites	氨基酸及其代谢物	Small Peptide	小肽	197.1	196.121	[M+H]+	C10H16N2O2	78102.3	49442	34650.8	5886.29	10734.3	2838.37	17674.2	10085.1	7901.38	6304.34	10575.4	14054	3030.45	197621	83356.1	62769.2	45046	14939.5	146094	59512.8	83486	14030.7	53520	54321.2	65935.6	65935.2	65737.4	63266.2	66634.4	66587.8	-	-	-	5654-87-5	-	-	-
MEDN1910	Cys-Pro	L-半胱氨酸-L-脯氨酸	Amino acid and Its metabolites	氨基酸及其代谢物	Small Peptide	小肽	217.1	218.073	[M-H]-	C8H14N2O3S	1.27681e+06	1.53413e+06	1.61504e+06	1.48722e+06	1.17991e+06	1.70235e+06	4.70507e+06	2.63343e+06	2.10752e+06	1.34025e+06	2.49771e+06	2.74114e+06	1.66703e+06	1.85875e+06	1.69443e+06	1.52158e+06	1.68359e+06	2.17615e+06	3.87022e+06	4.83671e+06	3.38029e+06	4.88799e+06	3.74051e+06	2.65915e+06	1.8834e+06	1.8844e+06	1.90795e+06	1.90496e+06	1.90496e+06	1.88417e+06	-	-	3037777	-	-	-	-
MEDP2542	Gln-Gly	L-谷氨酰胺-L-甘氨酸	Amino acid and Its metabolites	氨基酸及其代谢物	Small Peptide	小肽	204.1	203.09	[M+H]+	C7H13N3O4	4.24923e+06	4.78858e+06	4.38198e+06	4.31421e+06	5.32853e+06	4.50636e+06	3.80939e+06	3.34028e+06	3.63273e+06	3.7574e+06	3.57902e+06	5.76838e+06	4.19317e+06	4.92307e+06	4.65511e+06	5.90306e+06	5.38581e+06	5.68046e+06	13.713	5.38599e+06	5.93132e+06	5.59277e+06	6.76196e+06	5.17434e+06	4.39843e+06	4.3963e+06	4.18196e+06	4.3712e+06	4.37113e+06	4.33605e+06	-	HMDB0028797	6992691	2650-65-9	73848	-	-
MEDN1478	Glu-Gln	L-谷氨酰-L-谷氨酰胺	Amino acid and Its metabolites	氨基酸及其代谢物	Small Peptide	小肽	274.1	275.112	[M-H]-	C10H17N3O6	29398	31691	33005.3	42156	35279.1	35952.8	18421.4	14263	21544.2	13542	15917.1	14953.1	15117.7	12918.6	1.84704	9160.82	2052.97	8613.29	9382.58	10591.7	11363.2	1.84704	4955.35	9263.6	44992.7	45207.2	45737.7	45752.9	45761.3	44545.7	-	-	10171586	-	-	-	-
MEDP1671	Glu-Glu-Ile	Glu-Glu-Ile	Amino acid and Its metabolites	氨基酸及其代谢物	Small Peptide	小肽	390.2	389.18	[M+H]+	C16H27N3O8	8185.73	868.536	965.55	2113.06	1341.05	2299.72	1531.68	1207.46	1014.57	2142.04	1607.73	386.392	772.803	1125.85	462.446	258.757	8288.48	435.033	227.11	147.603	324.407	885.549	322.191	294.856	29080.6	29504.2	29094.3	29056.6	29049.7	29561.3	-	-	-	-	-	-	-
MEDP2355	Glu-Gly	谷氨酰-甘氨酸	Amino acid and Its metabolites	氨基酸及其代谢物	Small Peptide	小肽	205.1	204.07	[M+H]+	C7H12N2O5	1.68316e+06	2.59187e+06	3.01041e+06	2.76059e+06	1.86799e+06	3.23302e+06	1.36568e+06	1.04295e+06	1.18235e+06	1.10971e+06	1.18152e+06	1.13055e+06	1.48387e+06	2.04103e+06	1.67844e+06	1.81621e+06	2.26521e+06	1.99901e+06	3.05942e+06	2.46487e+06	2.44476e+06	2.94605e+06	3.38519e+06	3.77728e+06	1.48819e+06	1.53819e+06	1.52928e+06	1.46247e+06	1.55003e+06	1.53551e+06	-	HMDB0028819	6427052	1948-29-4	73505	-	-
MEDP2325	Glu-His	谷氨酸-组氨酸	Amino acid and Its metabolites	氨基酸及其代谢物	Small Peptide	小肽	285.1	284.112	[M+H]+	C11H16N4O5	0.244047	274.283	219.436	304.688	0.244047	555.899	0.244047	0.244047	0.244047	0.244047	0.244047	0.244047	77.5602	14.8029	112.803	13.78	21.6343	63.3503	194.213	17.2147	111.143	71.7866	29.4338	116.076	10725.4	10562.7	10727.7	10768.2	10801.5	10432.8	-	HMDB0028821	9921875	37460-15-4	-	-	-
MEDP2394	Glu-Ile	谷氨酸-异亮氨酸	Amino acid and Its metabolites	氨基酸及其代谢物	Small Peptide	小肽	261.1	260.137	[M+H]+	C11H20N2O5	0.427362	0.427362	0.427362	0.427362	0.427362	0.427362	1252.61	0.427362	3161.78	1863.98	2127.48	560.237	137.154	154.528	70.2488	143.845	177.266	120.523	1216.52	323.735	1945.99	1487.27	978.834	1989.28	23175.4	24073.3	23682.6	24178.9	22930.4	24325.7	-	HMDB0028822	9813855	5879-22-1	-	-	-
MEDP2597	Glu-Phe	L-谷氨酸-L-苯丙氨酸	Amino acid and Its metabolites	氨基酸及其代谢物	Small Peptide	小肽	295.1	294.121	[M+H]+	C14H18N2O5	5265.8	1139.81	3500.45	1186.31	543.008	2984.01	2084.92	547.379	3355.97	1803.93	1390.71	3107.92	1722.57	960.305	1231.15	778.529	947.346	1424.72	905.88	730.395	608.677	717.506	777.722	1245.71	28692.1	28883.6	28880	29023.3	28515.5	28539.8	-	HMDB0029156	18653118	20556-22-3	-	-	-
MEDP1862	Glu-Val	谷氨酸-缬氨酸	Amino acid and Its metabolites	氨基酸及其代谢物	Small Peptide	小肽	493.2	246.122	[2M+H]+	C10H18N2O5	6725.81	2839.8	10110.2	8422.17	16379.1	12089.4	5406.58	6116.08	23287	5583.08	3610.32	8931.78	5555.43	8794.95	6010.75	5642.87	7589.58	5901.46	5339.96	4661.38	4600.09	7587.49	8192.63	8954.87	22047.4	22045.7	22706.4	21504.6	22770.6	21456.9	-	HMDB0028832	6992567	5879-06-1	68846	-	-
MEDP2313	Gly-Gln	L-甘氨酸-L-谷氨酰胺	Amino acid and Its metabolites	氨基酸及其代谢物	Small Peptide	小肽	204.1	203.091	[M+H]+	C7H13N3O4	7.21409e+06	4.3303e+06	7.65855e+06	8.0112e+06	8.16973e+06	6.71592e+06	1.04481e+07	1.05458e+07	1.43151e+07	1.00323e+07	1.08024e+07	1.09518e+07	6.67961e+06	1.27639e+07	1.19752e+07	1.33297e+07	1.1001e+07	1.00976e+07	1.00206e+07	1.22019e+07	1.27068e+07	1.37277e+07	1.33141e+07	1.03063e+07	8.45424e+06	7.86762e+06	8.45341e+06	8.32716e+06	8.44745e+06	8.44834e+06	D94472	-	123913	13115-71-4	-	-	-
MEDP1670	Gly-Gly-Phe	甘氨酸-甘氨酸-苯丙氨酸	Amino acid and Its metabolites	氨基酸及其代谢物	Small Peptide	小肽	280.1	279.122	[M+H]+	C13H17N3O4	7217.8	3474.99	2081.59	0.673987	4938.47	1711.31	1565.91	0.673987	4930.04	1749.68	2353.28	2205.63	1083.78	0.128862	335.069	0.128862	952.83	264.633	452.948	515.61	504.703	0.128862	0.128862	659.319	33686	33162.4	33358.6	33149	33566	33532.6	-	-	6993373	6234-26-0	-	-	-
MEDP1790	Gly-Ile	L-甘氨酸-L-异亮氨酸	Amino acid and Its metabolites	氨基酸及其代谢物	Small Peptide	小肽	189.1	188.116	[M+H]+	C8H16N2O3	2268.62	834.087	414.31	315.282	942.045	595.318	0.200594	0.200594	0.200594	0.200594	0.200594	0.200594	1033.87	56.1745	128.666	215.91	188.684	98.4872	244.331	204.803	160.08	143.365	140.218	412.72	27310.4	27420.3	27310.5	27308.3	27337.3	27421.9	-	HMDB0028844	88079	19461-38-2	-	-	-
MEDP2312	Gly-Lys	甘氨酸-赖氨酸	Amino acid and Its metabolites	氨基酸及其代谢物	Small Peptide	小肽	204.1	203.126	[M+H]+	C8H17N3O3	7.57442e+06	8.21809e+06	1.19952e+07	1.16179e+07	1.16181e+07	1.12121e+07	1.46924e+07	1.61609e+07	2.02286e+07	1.72084e+07	16987387	1.64407e+07	1.01784e+07	2.08398e+07	1.81603e+07	2.04355e+07	1.94462e+07	1.70481e+07	1.73925e+07	1.85951e+07	1.86771e+07	2.19084e+07	2.00646e+07	1.51817e+07	1.35119e+07	12829826	1.28332e+07	1.29019e+07	1.29498e+07	1.30006e+07	-	-	3080576	997-62-6	-	-	-
MEDP2335	Gly-Thr	甘氨酸-苏氨酸	Amino acid and Its metabolites	氨基酸及其代谢物	Small Peptide	小肽	177.1	176.08	[M+H]+	C6H12N2O4	182693	147044	161808	300183	90434.5	272095	25402.8	48569.5	35789.6	38355.6	48582.9	29633	88648.2	125202	157055	170243	159279	154629	141717	110924	166952	140573	165852	191083	122938	101928	123342	122183	116894	117361	-	-	111257	7093-70-1	-	-	-
MEDN1912	His-Ala	组氨酸-丙氨酸	Amino acid and Its metabolites	氨基酸及其代谢物	Small Peptide	小肽	225.1	226.1	[M-H]-	C9H14N4O3	14656.5	6623.78	7095.22	10744.6	6859.85	3632.74	1611.31	3237.99	5.2167	2389.5	1038.97	1363.1	5377.08	1743.33	2359.68	1958.1	5827.88	2324.63	2.0464	2.0464	2.0464	2.0464	2.0464	2.0464	9289.24	9524.82	9285.73	9691.44	8876.24	8972.84	-	HMDB0028878	101180	16874-75-2	-	-	-
MEDP2350	His-Pro	组氨酸-脯氨酸	Amino acid and Its metabolites	氨基酸及其代谢物	Small Peptide	小肽	253.1	252.122	[M+H]+	C11H16N4O3	2901.42	3308.8	1956.01	6171.8	6556.54	2517.67	4003.68	739.42	4943.01	0.799667	646.958	1929.35	0.248102	0.24648	0.250658	0.25551	0.253126	0.258637	374.093	491.446	0.251961	378.475	230.555	1685.4	20409.4	22574.6	20482.7	22318	17536.3	22367.5	-	HMDB0028893	152322	20930-58-9	-	-	-
MEDN2117	Hyp-Thr	L-羟脯氨酸-L-苏氨酸	Amino acid and Its metabolites	氨基酸及其代谢物	Small Peptide	小肽	231.1	232.106	[M-H]-	C9H16N2O5	271533	435169	260655	348667	308226	378018	636139	293549	245901	308300	315630	289932	738775	415695	398100	386830	370062	441604	433808	408905	321161	271612	787352	262459	355055	355126	343948	374970	338821	339372	-	-	-	-	-	-	-
MEDP2352	Ile-Arg	异亮氨酸-精氨酸	Amino acid and Its metabolites	氨基酸及其代谢物	Small Peptide	小肽	288.2	287.196	[M+H]+	C12H25N5O3	2733.83	5565.21	2940.13	2240.86	841.103	4979.47	2791.09	6005.85	6364.2	2791.64	7713.63	6046.11	1215.21	492.939	634.154	660.541	533.518	0.213776	2484	2187.46	2163.42	2115.96	1827.25	1978.51	74415.7	74206.6	71265.3	72925.7	72793.5	73150.3	-	-	7021814	55715-01-0	-	-	-
MEDP1935	Ile-Asp	异亮氨酰-天冬氨酸	Amino acid and Its metabolites	氨基酸及其代谢物	Small Peptide	小肽	247.1	246.121	[M+H]+	C10H18N2O5	21658.1	18431.6	40308.5	39942.4	25108.9	28293	21471.2	9696.3	19561.7	19627.4	16443	20150.8	4276.13	3324.33	3311.93	2214.88	4292.7	2932.38	1661.1	884.676	1921.12	2337.71	2413.37	1233.04	95965.7	96615.2	96615.7	95327.5	96895	96900.1	-	HMDB0028903	-	-	-	-	-
MEDP2392	Ile-Glu	异亮氨酸-谷氨酸	Amino acid and Its metabolites	氨基酸及其代谢物	Small Peptide	小肽	261.1	260.137	[M+H]+	C11H20N2O5	0.427362	0.427362	0.427362	0.427362	0.427362	0.427362	1252.61	0.427362	3161.78	1863.98	2127.48	560.237	137.154	154.528	70.2488	143.845	177.266	120.523	1216.52	323.735	1945.99	1487.27	978.834	1989.28	23175.4	24073.3	23682.6	24178.9	22930.4	24325.7	-	-	7009625	42516-53-0	-	-	-
MEDP2452	Ile-Ile	异亮氨酸-异亮氨酸	Amino acid and Its metabolites	氨基酸及其代谢物	Small Peptide	小肽	245.2	244.179	[M+H]+	C12H24N2O3	340993	267997	314103	172537	310371	198963	334300	366352	388748	346435	250645	398627	11990.4	8776.95	12807.8	2.29349	22275.4	7875.32	13659.7	19140.1	14595.3	13117.9	10561.9	17127.8	494279	523854	505041	512213	512970	512215	-	-	7010568	42537-99-5	-	-	-
MEDP2453	Ile-Leu	异亮氨酸-亮氨酸	Amino acid and Its metabolites	氨基酸及其代谢物	Small Peptide	小肽	245.2	244.179	[M+H]+	C12H24N2O3	46.8893	44.0738	30.768	24.404	90.6682	29.2988	25.054	26.069	29.4478	15.4156	17.1514	13.4628	0.286759	1479.08	2110.53	899.885	1746.98	717.239	822.788	1885.84	845.063	1723.56	1088.91	1363.46	50035.1	52708.8	49953.9	51474.5	51668.5	51668.5	D81944	-	7019083	26462-22-6	-	-	-
MEDP2467	Ile-Trp	异亮氨酸-色氨酸	Amino acid and Its metabolites	氨基酸及其代谢物	Small Peptide	小肽	318.2	317.174	[M+H]+	C17H23N3O3	13732.4	4.00875	25741.8	6914.64	14617	7327.94	4.00875	4.00875	4.00875	4.00875	4.00875	4.00875	0.9531	0.9531	0.9531	0.9531	0.9531	0.9531	29592.7	34094.3	20255.1	24921.8	26559.1	21676.5	23366.9	23407.9	23951.8	24066.9	23375.6	23357.1	-	-	7019085	13589-06-5	-	-	-
MEDP1776	Leu-Ala	L-亮氨酸-L-丙氨酸	Amino acid and Its metabolites	氨基酸及其代谢物	Small Peptide	小肽	203.1	202.132	[M+H]+	C9H18N2O3	1856.6	6144.46	7454.92	5620.38	22407.1	5812.41	1931.62	1833.45	2618.67	2338.57	5785.08	2075.01	314.739	0.151425	160.074	0.151425	329.48	50.012	1089.57	616.481	562.447	405.889	699.555	288.204	34974.6	35171.4	34974.5	33439.9	32693.6	38878.2	D78456	HMDB0028922	81721	7298-84-2	-	-	-
MEDP2592	Leu-Arg	L-亮氨酸-L-精氨酸	Amino acid and Its metabolites	氨基酸及其代谢物	Small Peptide	小肽	288.2	287.195	[M+H]+	C12H25N5O3	2733.83	5565.21	2940.13	2240.86	841.103	4979.47	2791.09	6005.85	6364.2	2791.64	7713.63	6046.11	1215.21	492.939	634.154	660.541	533.518	0.213776	2484	2187.46	2163.42	2115.96	1827.25	1978.51	74415.7	74206.6	71265.3	72925.7	72793.5	73150.3	-	-	152914	26607-15-8	-	-	-
MEDP2504	Leu-Asn	亮氨酸-天冬酰胺	Amino acid and Its metabolites	氨基酸及其代谢物	Small Peptide	小肽	246.1	245.137	[M+H]+	C10H19N3O4	714.085	1277.37	499.966	443.618	1298.53	0.574557	0.574557	0.574557	0.574557	0.574557	0.574557	0.574557	817.8	0.57344	0.646757	340.536	2190.79	678.883	953.55	265.921	690.777	623.759	449.698	1490.31	7819.16	8724.27	8010.83	8144.26	8536.94	8637.43	-	-	7016078	14608-81-2	-	-	-
MEDP2393	Leu-Glu	L-亮氨酸-L-谷氨酸	Amino acid and Its metabolites	氨基酸及其代谢物	Small Peptide	小肽	261.1	260.137	[M+H]+	C11H20N2O5	0.427362	0.427362	0.427362	0.427362	0.427362	0.427362	1252.61	0.427362	3161.78	1863.98	2127.48	560.237	137.154	154.528	70.2488	143.845	177.266	120.523	1216.52	323.735	1945.99	1487.27	978.834	1989.28	23175.4	24073.3	23682.6	24178.9	22930.4	24325.7	-	-	7009630	16364-31-1	-	-	-
MEDP2307	Leu-Leu	L-亮氨酰-L-亮氨酸	Amino acid and Its metabolites	氨基酸及其代谢物	Small Peptide	小肽	245.2	244.179	[M+H]+	C12H24N2O3	46.8893	44.0738	30.768	24.404	90.6682	29.2988	25.054	26.069	29.4478	15.4156	17.1514	13.4628	0.286759	1479.08	2110.53	899.885	1746.98	717.239	822.788	1885.84	845.063	1723.56	1088.91	1363.46	50035.1	52708.8	49953.9	51474.5	51668.5	51668.5	C11332	HMDB0028933	76807	3303-31-9	73531	-	-
MEDP1683	Leu-Leu-Leu	亮氨酸-亮氨酸-亮氨酸	Amino acid and Its metabolites	氨基酸及其代谢物	Small Peptide	小肽	358.3	357.263	[M+H]+	C18H35N3O4	3696.83	2825.8	1485.87	1465.19	1800.23	1061.33	547.022	2723.65	1073.92	2998.9	1891.41	1437.2	0.196396	0.196396	0.196396	0.196396	0.196396	0.196396	399.166	638.898	717.463	259.463	540.303	522.953	33597.1	33588.7	31302.5	32616.3	33202.4	32614.4	-	-	82546	10329-75-6	-	-	-
MEDP1873	Leu-Pro-Tyr	亮氨酸-脯氨酸-酪氨酸	Amino acid and Its metabolites	氨基酸及其代谢物	Small Peptide	小肽	392.2	391.211	[M+H]+	C20H29N3O5	874811	416803	124251	321792	421706	607947	60394.6	57853.4	95115.5	59041.1	69059.5	38090	76828.4	132659	35889.9	21330.8	35484.1	20817.1	611154	286790	292412	506950	284223	1.70202e+06	216294	206542	206354	210311	204292	210258	-	HMDB0007179	11234718	65886-80-8	77129	-	-
MEDP2466	Leu-Trp	亮氨酸-色氨酸	Amino acid and Its metabolites	氨基酸及其代谢物	Small Peptide	小肽	318.2	317.174	[M+H]+	C17H23N3O3	15438.5	40300.9	47938.4	10509.6	24874.6	14390	5.9796	5.9796	5.9796	5.9796	5.9796	5.9796	1.04633	1.04633	1.04633	1.04633	1.04633	1.04633	31414.1	41956.6	22022.3	27617.2	30895.2	29079.1	30198.7	30476.7	30467.3	30743	30253.6	30253	-	-	6992319	5156-22-9	-	-	-
MEDP1506	Leu-Val	L-亮氨酰-L-缬氨酸	Amino acid and Its metabolites	氨基酸及其代谢物	Small Peptide	小肽	231	230.163	[M+H]+	C11H22N2O3	41.1135	29.4002	15.0702	25.4663	58.8207	17.9314	0.00462001	0.00462001	0.00462001	0.00462001	0.00462001	0.00462001	10.79	7.37778	6.54263	5.81572	23.6706	6.18516	9.43181	0.00475654	0.00475654	6.1282	6.54169	7.61355	16216.7	16106.5	16106.3	16080.3	16170	16169.8	-	HMDB0028942	6993116	13588-95-9	-	-	-
MEDP2549	Lys-Ala	L-赖氨酸-L-丙氨酸	Amino acid and Its metabolites	氨基酸及其代谢物	Small Peptide	小肽	218.2	217.142	[M+H]+	C9H19N3O3	4.68136e+06	3.23738e+06	5.98993e+06	2.92901e+06	4.91413e+06	2.86314e+06	2.54694e+06	2.13361e+06	1.91193e+06	1.90528e+06	1.89994e+06	2.35336e+06	3.29613e+06	3.54474e+06	2.78235e+06	2.94723e+06	4.58772e+06	4.29596e+06	1.93276e+06	1.35425e+06	2.83903e+06	2.52642e+06	1.59352e+06	1.68014e+06	2.81105e+06	2.83809e+06	2.84206e+06	2.81706e+06	2.81552e+06	2.8383e+06	-	HMDB0028944	7010504	17043-71-9	-	-	-
MEDP2578	Lys-Asn	L-赖氨酸-L-天冬酰胺	Amino acid and Its metabolites	氨基酸及其代谢物	Small Peptide	小肽	261.2	260.148	[M+H]+	C10H20N4O4	46938.6	51036.9	28652.8	24193.5	25745.3	27317.3	23698.4	29761.5	20063	22096.6	24157	24139.8	6775.04	12750.1	7259.35	5211.48	9570.43	3583.08	3825.86	6644.5	5578.66	7909.33	9173.51	6779.87	48196.6	50842.9	48414.3	50580.7	44722	50720.4	-	HMDB0028946	11219156	19908-06-6	-	-	-
MEDP2371	Lys-Ile	赖氨酸-异亮氨酸	Amino acid and Its metabolites	氨基酸及其代谢物	Small Peptide	小肽	260.2	259.19	[M+H]+	C12H25N3O3	2.48371e+06	4.24788e+06	1.86903e+06	539318	539008	2.57085e+06	2.68439e+06	935517	3.02834e+06	2.18301e+06	2.99896e+06	1.77096e+06	439022	325585	385037	290322	298639	468846	1.32623e+06	575893	1.178e+06	1.02822e+06	1.41159e+06	1.15309e+06	1.29117e+06	1.44513e+06	1.29176e+06	1.4129e+06	1.26197e+06	1.31404e+06	-	HMDB0028954	7010499	20556-13-2	-	-	-
MEDP2318	Lys-Ser	赖氨酸-丝氨酸	Amino acid and Its metabolites	氨基酸及其代谢物	Small Peptide	小肽	234.1	233.137	[M+H]+	C9H19N3O4	31295.2	49599.7	49593	23776.5	8200.18	37362.2	24982	18924.8	17912.7	4823.94	5305.46	23143.6	20412.3	16455	16402.9	20079.2	36812.2	18173.2	22424.4	12131.2	11582.1	15497.8	14431.3	13781.5	81116.7	79745.1	78845.3	81569.2	77939.8	81811.8	-	-	151428	6665-19-6	-	-	-
MEDP2605	Lys-Tyr	L-赖氨酸-L-酪氨酸	Amino acid and Its metabolites	氨基酸及其代谢物	Small Peptide	小肽	310.2	309.169	[M+H]+	C15H23N3O4	12213	21261.4	10683.5	12570.2	21499.8	22601.2	142266	112640	92948	164665	85842.5	120910	39030.2	4911.41	16861.2	17403.4	29340.3	25222.2	58039.5	30062.8	53703.2	59539.4	72407.4	51820.5	148632	162197	148630	151970	159845	159688	-	-	7021820	35978-98-4	-	-	-
MEDN1950	Met-Asp	L-蛋氨酸-L-天冬氨酸	Amino acid and Its metabolites	氨基酸及其代谢物	Small Peptide	小肽	263.1	264.078	[M-H]-	C9H16N2O5S	59500.2	24619.2	100804	411324	96633.6	49737.1	66645.6	51373.4	81075	18187.3	25688.3	75992.8	109147	54677.1	22.1785	31152.5	66890.1	32183	263330	933673	230894	125570	935750	687641	36622.3	39459.9	39563.9	36752.6	40283	37389	-	-	7009610	14595-65-4	-	-	-
MEDP2589	Met-Met	L-蛋氨酸-L-蛋氨酸	Amino acid and Its metabolites	氨基酸及其代谢物	Small Peptide	小肽	281.1	280.092	[M+H]+	C10H20N2O3S2	600.652	277.91	101.576	227.414	422.517	954.876	0.184056	0.184056	0.184056	0.184056	0.184056	0.184056	111.701	3.67266	138.825	0.0245567	31.356	8.70663	0.0245567	0.0245567	0.0245567	0.0245567	0.0245567	0.0245567	4106.72	4108.07	4022.5	3936.85	4125.65	4130.48	-	-	6993082	7349-78-2	-	-	-
MEDN1985	Met-Val	甲硫氨酸-缬氨酸	Amino acid and Its metabolites	氨基酸及其代谢物	Small Peptide	小肽	247.1	248.12	[M-H]-	C10H20N2O3S	7818.12	6026.65	2525.94	5339.99	5564	4798.66	5325.57	5854.68	5324.81	2257.59	6570.32	3555.75	2582.24	2347.52	2143.15	2145.97	1745.72	1442.42	1372.91	2202.83	1094.18	901.374	1172.01	1144.56	11115	11013.4	10376.7	12390.1	10084	10186.3	-	-	7010520	14486-13-6	-	-	-
MEDP1913	N(Alpha)-Acetyl-Epsilon-(2-Propenal)Lysine	N（α）-乙酰基ε-（2-丙烯基）赖氨酸	Amino acid and Its metabolites	氨基酸及其代谢物	Small Peptide	小肽	243.1	242.127	[M+H]+	C11H18N2O4	40492.7	41848.1	33170.1	35332.4	115946	36778.4	16943.5	18164.7	24921.6	16577.2	18043.5	10980.1	18105.3	12229.8	14950.3	9223.55	39031.7	22530.8	21127.7	11482.5	19095.1	19812.9	9395.76	11482.5	67629.1	68989.7	67650.2	69202.1	66926.7	69226.7	-	-	6438822	99124-74-0	-	-	-
MEDP2565	Phe-Ala	L-苯丙氨酸-L-丙氨酸	Amino acid and Its metabolites	氨基酸及其代谢物	Small Peptide	小肽	237.1	236.116	[M+H]+	C12H16N2O3	81406.9	36384.6	41935.7	29977.6	23388.3	17667.8	4.87724	4.87724	4.87724	4.87724	4.87724	4.87724	2813.43	3431.8	5072.22	2684.97	483.972	9040.02	1532.23	2356.55	2271.97	1708.04	1880.68	1892.36	45140.8	45741	45715.5	46072.6	45109.7	44618.3	-	HMDB0028988	5488196	3918-87-4	-	-	-
MEDP1667	Phe-Glu	苯丙氨酸-谷氨酸	Amino acid and Its metabolites	氨基酸及其代谢物	Small Peptide	小肽	295.1	294.122	[M+H]+	C14H18N2O5	5265.8	1139.81	3500.45	1186.31	543.008	2984.01	2084.92	547.379	3355.97	1803.93	1390.71	3107.92	1722.57	960.305	1231.15	778.529	947.346	1424.72	905.88	730.395	608.677	717.506	777.722	1245.71	28692.1	28883.6	28880	29023.3	28515.5	28539.8	-	HMDB0028994	151134	3617-45-6	-	-	-
MEDP2431	Phe-Gly	苯丙氨酸-甘氨酸	Amino acid and Its metabolites	氨基酸及其代谢物	Small Peptide	小肽	223.1	222.1	[M+H]+	C11H14N2O3	2.64309	2.64309	2.64309	2.64309	2.64309	2.64309	31299.3	2.64309	64987.7	42374.8	2.64309	12029.2	1.42556	1.42556	1.42556	1.42556	1.42556	1.42556	24108.9	21200.3	24619.1	27844.1	16155.2	71604.8	72763.6	72545.9	63109.3	68122.3	72178.7	72185.7	-	-	6992304	721-90-4	-	-	-
MEDP2584	Phe-Thr	L-苯丙氨酸-L-苏氨酸	Amino acid and Its metabolites	氨基酸及其代谢物	Small Peptide	小肽	267.1	266.126	[M+H]+	C13H18N2O4	2243.51	955.322	1120.67	1361.03	4917.28	1956.63	2583.93	304.774	1925.3	4374.93	4252.27	2105.74	978.931	319.004	388.021	222.509	883.409	240.145	412.862	26.565	121.771	90.4951	74.744	404.58	44835.4	44908.5	44835.3	44719.6	44845.1	45007.4	-	HMDB0029005	10445608	51352-44-4	-	-	-
MEDP1512	Phe-Val	苯丙氨酰-缬氨酸	Amino acid and Its metabolites	氨基酸及其代谢物	Small Peptide	小肽	265	264.147	[M+H]+	C14H20N2O3	15202.4	1483.33	1641.03	387.033	688.046	1528.44	10083.5	4295.73	13960.4	6534.05	2087.26	2375.07	1068.44	620.788	532.206	249.962	783.468	341.392	3718.79	954.578	1093.75	425.975	628.168	1011.39	52973	53267.8	53266.1	52962.4	52963.9	53275.9	-	HMDB0029008	4096934	-	-	-	-
MEDP2567	Pro-Gln	L-脯氨酸-L-谷氨酰胺	Amino acid and Its metabolites	氨基酸及其代谢物	Small Peptide	小肽	244.1	243.121	[M+H]+	C10H17N3O4	2348.81	2974.75	1236.27	958.544	0.220789	2350.68	2290.11	1411.28	1943.98	586.799	2269.53	952.602	1218.54	546.742	745.35	1193.63	1202.32	948.683	1048.81	543.514	745.675	1515.48	916.434	1520.3	49467.2	49448.9	51599.7	49601	50044.9	49608.4	-	-	7408110	18668-08-1	-	-	-
MEDP2358	Pro-Glu	脯氨酸-谷氨酸	Amino acid and Its metabolites	氨基酸及其代谢物	Small Peptide	小肽	245.1	244.106	[M+H]+	C10H16N2O5	16179.2	28485.1	20589.3	38775.5	45747.8	25013	33205.1	35801.9	18848.3	20298.1	15368.8	20032.9	9604.83	11442.9	10468	7306.24	15284.4	12598.4	26140.2	12659.3	28804	19454.2	16312.9	13589.2	81325.6	83314.9	97748.3	83045.6	88236.8	83852.5	-	-	194260	67644-00-2	-	-	-
MEDP1885	Pro-Ile	脯氨酸-异亮氨酸	Amino acid and Its metabolites	氨基酸及其代谢物	Small Peptide	小肽	211.1	228.147	[M-H2O+H]+	C11H20N2O3	275022	160674	128309	23573.4	11149.8	30987.6	106728	108215	99645.4	111509	124239	67924.8	8099.57	656135	333366	204358	259884	112623	879736	498729	764846	319650	429772	418005	206669	200235	206879	206583	204123	204105	-	-	7079600	-	-	-	-
MEDP2339	Pro-Ser	脯氨酸-丝氨酸	Amino acid and Its metabolites	氨基酸及其代谢物	Small Peptide	小肽	203.1	202.095	[M+H]+	C8H14N2O4	452525	692048	1.29652e+06	695523	101037	903505	217980	270567	390879	189787	117250	266196	1.35777e+06	501194	738299	402052	258328	824546	150727	161294	193563	338137	168989	215267	465259	485620	466979	481205	454343	481193	-	-	7408258	71835-80-8	-	-	-
MEDP2398	Pyr-Glu	焦谷氨酸-谷氨酸	Amino acid and Its metabolites	氨基酸及其代谢物	Small Peptide	小肽	259.1	258.085	[M+H]+	C10H14N2O6	40924.4	13897.3	22332.5	23739.2	674488	29716.3	28352.5	36195.5	59251.7	50969.4	43475.6	30225.7	5763.57	1474.28	0.655582	2326.74	9971.47	1845.66	4528.98	2630.44	1981.63	2923.68	3382.32	5356.73	117157	119252	119159	117382	117423	122103	-	-	70530537	29227-92-7	-	-	-
MEDP2560	Ser-Lys	L-丝氨酸-L-赖氨酸	Amino acid and Its metabolites	氨基酸及其代谢物	Small Peptide	小肽	234.1	233.137	[M+H]+	C9H19N3O4	24409.9	18339.1	7704.14	23698.4	15125	20691.5	12309.2	9381.89	9363.32	9247.88	11334.5	6867.09	9266.13	8640.37	8301.62	8132.41	27051.7	16514.4	6579.59	6393.11	5848.18	8056.66	8810.28	9940.88	52973.9	53973.8	54036.2	54695.8	52336.4	51704.9	-	HMDB0029044	16122513	22677-61-8	-	-	-
MEDP1889	Ser-Phe	丝氨酸-苯丙氨酸	Amino acid and Its metabolites	氨基酸及其代谢物	Small Peptide	小肽	253.1	252.111	[M+H]+	C12H16N2O4	2883.67	2117.42	951.276	2202.49	2485.7	2905.9	2783.83	803.95	579.356	0.551452	0.551452	803.373	362.398	0.179158	345.583	265.632	262.757	349.466	851.975	1435.02	1008.8	742.919	952.437	376.34	36820.7	36827	36427.4	36488.3	37037.6	36488	-	HMDB0029046	7009598	16875-28-8	71029	-	-
MEDP2367	Ser-Pro	L-丝氨酸-L-脯氨酸	Amino acid and Its metabolites	氨基酸及其代谢物	Small Peptide	小肽	203.1	202.095	[M+H]+	C8H14N2O4	318814	464155	1.02022e+06	590483	151806	765022	146290	258561	280531	130697	87888.3	206793	1.04751e+06	449246	675761	474670	269333	629570	201321	134619	184589	205038	188459	170277	422463	441499	422729	428780	440915	428639	-	-	4369021	23827-93-2	-	-	-
MEDP2378	Ser-Val	丝氨酸-缬氨酸	Amino acid and Its metabolites	氨基酸及其代谢物	Small Peptide	小肽	205.1	204.111	[M+H]+	C8H16N2O4	1.64056e+06	1.53433e+06	1.80753e+06	2.76166e+06	3.08072e+06	2.43954e+06	3.67268e+06	4.06807e+06	3.42786e+06	3.41759e+06	3.71189e+06	4.04907e+06	2.30752e+06	3.20447e+06	2.59064e+06	2.84444e+06	3.10495e+06	3.62969e+06	2.27428e+06	2.18473e+06	2.85386e+06	5.64605e+06	3.80622e+06	1.64538e+06	2.27437e+06	2.36157e+06	2.26914e+06	2.29265e+06	2.51149e+06	2.2961e+06	-	HMDB0029052	7020159	51782-06-0	74823	-	-
MEDP2494	Thr-Arg	L-苏氨酸-L-精氨酸	Amino acid and Its metabolites	氨基酸及其代谢物	Small Peptide	小肽	276.2	275.159	[M+H]+	C10H21N5O4	327533	242406	297706	222739	210251	119934	118638	178886	124879	105700	133204	120696	295577	284576	263227	245656	227826	296396	299813	237800	192745	227907	201911	229232	261543	250783	262071	259769	251436	261202	-	-	7016110	13448-26-5	-	-	-
MEDP2416	Thr-Ile	苏氨酸-异亮氨酸	Amino acid and Its metabolites	氨基酸及其代谢物	Small Peptide	小肽	233.1	232.14	[M+H]+	C10H20N2O4	132.536	156.563	189.292	115.378	251.004	98.0104	0.0575218	0.0575218	0.0575218	0.0575218	0.0575218	0.0575218	0.0466855	0.0466855	0.0466855	0.0466855	0.0466855	0.0466855	38.1769	28.5039	18.8082	29.0321	88.3672	81.2331	6433.26	6433.65	6518.76	6481.01	6471.48	6484.92	-	-	18218246	-	-	-	-
MEDP1912	Thr-Leu	L-苏氨酸-L-亮氨酸	Amino acid and Its metabolites	氨基酸及其代谢物	Small Peptide	小肽	233.1	232.142	[M+H]+	C10H20N2O4	132.536	156.563	189.292	115.378	251.004	98.0104	0.0575218	0.0575218	0.0575218	0.0575218	0.0575218	0.0575218	0.0466855	0.0466855	0.0466855	0.0466855	0.0466855	0.0466855	38.1769	28.5039	18.8082	29.0321	88.3672	81.2331	6433.26	6433.65	6518.76	6481.01	6471.48	6484.92	-	HMDB0029065	7021828	50299-12-2	-	-	-
MEDP1022	Thr-Phe	L-苏氨酸-L-苯丙氨酸	Amino acid and Its metabolites	氨基酸及其代谢物	Small Peptide	小肽	267.1	266.127	[M+H]+	C13H18N2O4	2243.51	955.322	1120.67	1361.03	4917.28	1956.63	2583.93	304.774	1925.3	4374.93	4252.27	2105.74	978.931	319.004	388.021	222.509	883.409	240.145	412.862	26.565	121.771	90.4951	74.744	404.58	44835.4	44908.5	44835.3	44719.6	44845.1	45007.4	-	HMDB0029068	4099799	16875-27-7	-	-	-
MEDP2463	Trp-Pro	L-色氨酸-L-脯氨酸	Amino acid and Its metabolites	氨基酸及其代谢物	Small Peptide	小肽	302.1	301.143	[M+H]+	C16H19N3O3	54809	73975.4	19580.2	46103.8	115789	17017.3	21265.6	38690.3	73741.9	32129.4	34378.3	41021	103183	11956.3	62355.9	43813	66953.4	22027.4	19957.3	5293.02	21049.3	13516.3	37873.5	23584.4	89719.2	88576.3	89681	85147.7	89178.1	90666.3	-	-	9839333	38136-75-3	-	-	-
MEDP2575	Tyr-Ala	L-酪氨酸-L-丙氨酸	Amino acid and Its metabolites	氨基酸及其代谢物	Small Peptide	小肽	253.1	252.111	[M+H]+	C12H16N2O4	33601	41368.5	111932	55420.9	98318.8	93271	7062.61	2.50006	7217.15	3173.36	8232.4	5176.74	14992	6076.6	5746.88	7776.65	12958.7	37782	1881.26	941.971	0.601445	1492.41	2944.68	1445.14	119355	118410	118406	117968	119325	117934	-	-	5496455	730-08-5	-	-	-
MEDP2385	Tyr-Asn	L-酪氨酸-L-天冬酰胺	Amino acid and Its metabolites	氨基酸及其代谢物	Small Peptide	小肽	296.1	295.117	[M+H]+	C13H17N3O5	27984	41473.5	45142.1	50421.2	16690	19473.2	3.51685	3.51685	3.51685	3.51671	3.51685	3.51685	13026.9	4888.05	7680.53	6813.7	1982.34	4904.13	1106.63	1446.23	1552.93	2051.72	2389.04	2750.43	29369.4	30139.7	29436.2	29251.2	30267.9	29141.4	-	-	18218251	151145-11-8	-	-	-
MEDP2388	Tyr-Asp	L-酪氨酸-L-天冬氨酸	Amino acid and Its metabolites	氨基酸及其代谢物	Small Peptide	小肽	297.1	296.101	[M+H]+	C13H16N2O6	91248.6	103881	198162	206080	74163.9	138015	113625	151772	124231	160486	163576	203241	108164	120448	123773	121388	123268	90076.4	171360	170640	194412	114200	257199	167273	124230	121121	136289	132662	132604	119390	-	-	9817652	87085-11-8	-	-	-
MEDP2391	Tyr-Glu	L-酪氨酸-L-谷氨酸	Amino acid and Its metabolites	氨基酸及其代谢物	Small Peptide	小肽	311.1	310.116	[M+H]+	C14H18N2O6	1.01964	1.01964	1.01964	1.01964	1.01964	1.01964	2341.21	2340.48	2765.41	3015.78	2464.24	3148.03	828.261	340.938	227.142	813.98	842.489	740.064	308.684	174.232	364.155	321.188	517.891	227.32	17661.5	21918.6	22381.8	21651.3	21778.1	20366.5	D81946	-	7009628	2545-89-3	-	-	-
MEDP2566	Tyr-Gly	L-酪氨酸-L-甘氨酸	Amino acid and Its metabolites	氨基酸及其代谢物	Small Peptide	小肽	239.1	238.095	[M+H]+	C11H14N2O4	11328.8	12171.7	25431.4	5825.06	14665.5	16448.2	17100.8	2776.88	10694.9	9576.61	6220.37	3907.17	2920.68	1336.16	1661.79	3455.27	7626.03	1580.87	2574.16	2646.08	1140.33	1943.56	2249.29	3651.8	46756.6	47295.7	46765.4	46858.1	46858.2	47711.2	-	HMDB0029105	7021854	673-08-5	-	-	-
MEDN2006	Tyr-Ile	酪氨酸-异亮氨酸	Amino acid and Its metabolites	氨基酸及其代谢物	Small Peptide	小肽	293.2	294.159	[M-H]-	C15H22N2O4	8063.22	2143.55	790.92	1291.45	1782.98	2880.14	610.802	572.184	1134.4	329.913	403.814	683.352	2782.5	107.858	1225.94	90.3798	373.632	141.915	1134.22	438.058	544.953	523.023	207.851	1636.63	96987.5	96964.1	97917	96925.4	97617.5	97618.3	-	-	7019110	40829-32-1	-	-	-
MEDP1894	Tyr-Leu	酪氨酸-亮氨酸	Amino acid and Its metabolites	氨基酸及其代谢物	Small Peptide	小肽	295.2	294.158	[M+H]+	C15H22N2O4	144459	32971.4	10583	14637.8	19226.2	44020	5336.09	5651.04	15224.6	5908.96	6380.07	4331.51	58475.8	1563.4	23008.3	1829.48	5744.52	2743.45	16380.3	7980.6	9553.35	9435.35	4775.27	26324.1	1.63456e+06	1.63456e+06	1.63752e+06	1.62905e+06	1.64108e+06	1.64107e+06	C73328	HMDB0029109	87071	17355-10-1	-	-	-
MEDP2430	Tyr-Pro	L-酪氨酸-L-脯氨酸	Amino acid and Its metabolites	氨基酸及其代谢物	Small Peptide	小肽	279.1	278.127	[M+H]+	C14H18N2O4	32144.6	14405.1	9571.78	13859.7	105170	18335.5	6703.92	5678.26	20291.4	11585.6	12709.7	4570.67	96581.8	11011.7	89104.3	11557.1	179801	21015.2	32225	8911.66	13555	19654.8	13727.9	30817.2	171100	171111	170057	169228	171874	171784	-	-	9795637	51871-47-7	-	-	-
MEDP2383	Tyr-Ser	L-酪氨酸-L-丝氨酸	Amino acid and Its metabolites	氨基酸及其代谢物	Small Peptide	小肽	269.1	268.106	[M+H]+	C12H16N2O5	3447.33	71111.4	202986	38745.2	16212.4	58835	21392.3	29279.4	17340.1	7432.65	32894.4	21169.5	2.8093	2.8093	3876.8	6798.78	9954.6	31051.9	11733.4	6099.38	2958.11	4896.38	16241.9	15141	94529.9	100595	94512.9	95309.1	95314.1	99521.6	-	-	54564570	13588-99-3	-	-	-
MEDP2432	Tyr-Tyr	L-酪氨酸-L-酪氨酸	Amino acid and Its metabolites	氨基酸及其代谢物	Small Peptide	小肽	345.1	344.137	[M+H]+	C18H20N2O5	946.887	695.779	313.098	920.807	458.232	736.321	489.422	308.242	1051.31	174.311	1157.58	508.09	821.084	76.0572	427.507	57.7271	129.847	138.909	226.118	182.169	135.214	57.7561	57.7415	302.642	17155.4	17020.4	17022.2	16695.1	17208	17206.7	-	-	70590	1050-28-8	-	-	-
MEDN1548	Val-Ala	L-缬氨酸-L-丙氨酸	Amino acid and Its metabolites	氨基酸及其代谢物	Small Peptide	小肽	187.1	188.116	[M-H]-	C8H16N2O3	3.45503e+06	3.0331e+06	2.98444e+06	3.18208e+06	3.46153e+06	3.08317e+06	2.92147e+06	3.13479e+06	2.83184e+06	2.79721e+06	2.90178e+06	2.92758e+06	1.7248e+06	2.07386e+06	1.84854e+06	1.94233e+06	2.03112e+06	2.00206e+06	2.11885e+06	2.10085e+06	2.0984e+06	1.99049e+06	2.03466e+06	1.98604e+06	3.18046e+06	3.16611e+06	3.18024e+06	3.16891e+06	3.17307e+06	3.17763e+06	-	-	6992638	27493-61-4	-	-	-
MEDP2327	Val-Arg	缬氨酸-精氨酸	Amino acid and Its metabolites	氨基酸及其代谢物	Small Peptide	小肽	274.2	273.18	[M+H]+	C11H23N5O3	656.566	515.745	196.396	95.2113	0.0915764	373.752	0.0915764	0.0915764	0.0915764	0.0915764	0.0915764	0.0915764	0.0210219	0.0210219	0.0210219	0.0210219	0.0210219	0.0210219	239.593	88.1462	64.9746	60.691	0.0210219	181.76	14210.9	14210.3	14507.3	14788.3	13240.1	14968.9	-	HMDB0029121	444523	37682-75-0	-	-	-
MEDP2399	Val-Glu	缬氨酸-谷氨酰胺	Amino acid and Its metabolites	氨基酸及其代谢物	Small Peptide	小肽	247.1	246.122	[M+H]+	C10H18N2O5	2000.86	3173.55	795.244	763.619	5817.29	3134.85	0.589684	0.589684	0.589684	0.589684	0.589684	0.589684	481.031	123.079	191.881	129.841	316.726	97.0616	0.125129	101.489	58.2065	140.671	64.9091	303.084	11436.1	12436.8	11596.5	12175.6	11911.7	11415.5	D81741	HMDB0029126	7009623	3062-07-5	-	-	-
MEDP2433	Val-Ile	缬氨酸-异亮氨酸	Amino acid and Its metabolites	氨基酸及其代谢物	Small Peptide	小肽	231.2	230.163	[M+H]+	C11H22N2O3	60.7753	103.688	161.158	44.3358	245.084	29.5676	0.0369572	0.0369572	0.0369572	0.0369572	0.0369572	0.0369572	0.0261648	0.0261648	0.0261648	0.0261648	0.0261648	0.0261648	24.8533	0.0261648	28.9355	32.2182	63.0342	53.8385	9316.04	9177.16	9239.36	9312.63	9228.6	9228.57	D97354	HMDB0029130	7010532	20556-14-3	-	-	-
MEDP2434	Val-Leu	缬氨酸-亮氨酸	Amino acid and Its metabolites	氨基酸及其代谢物	Small Peptide	小肽	231.2	230.163	[M+H]+	C11H22N2O3	60.7753	103.688	161.158	44.3358	245.084	29.5676	0.0369572	0.0369572	0.0369572	0.0369572	0.0369572	0.0369572	0.0261648	0.0261648	0.0261648	0.0261648	0.0261648	0.0261648	24.8533	0.0261648	28.9355	32.2182	63.0342	53.8385	9316.04	9177.16	9239.36	9312.63	9228.6	9228.57	-	HMDB0029131	6993118	3989-97-7	-	-	-
MEDN1913	Val-Lys	缬氨酸-赖氨酸	Amino acid and Its metabolites	氨基酸及其代谢物	Small Peptide	小肽	244.2	245.174	[M-H]-	C11H23N3O3	89.9117	60.6362	97.2041	51.2368	110.11	266.767	119.399	66.795	129.893	78.7274	48.975	81.2492	0.0790322	0.0790324	0.0790324	0.0790324	0.0790324	0.0790324	27.186	67.3278	44.8826	0.0790324	36.12	20.8975	4256.57	4075.94	4257.28	4300.7	3940.63	4325.3	-	HMDB0029132	168058	22677-62-9	-	-	-
MEDN1942	Val-Thr	缬氨酸-苏氨酸	Amino acid and Its metabolites	氨基酸及其代谢物	Small Peptide	小肽	217.1	218.127	[M-H]-	C9H18N2O4	3.52191e+06	3.7133e+06	4.4284e+06	4.20086e+06	2.86604e+06	4.59411e+06	1.15343e+07	6.5464e+06	6.13086e+06	3.63368e+06	6.87881e+06	8.79368e+06	4.36738e+06	5.49627e+06	5.54947e+06	5.27289e+06	5.97327e+06	6.74262e+06	1.30006e+07	1.44837e+07	1.09092e+07	1.43338e+07	1.2005e+07	8.23161e+06	5.14455e+06	5.28724e+06	5.14777e+06	5.13968e+06	5.36351e+06	5.13767e+06	D82099	-	9815826	72636-02-3	-	-	-
MEDN1970	cyclo(glu-glu)	环(谷氨酸-谷氨酸)	Amino acid and Its metabolites	氨基酸及其代谢物	Small Peptide	小肽	257.1	258.086	[M-H]-	C10H14N2O6	34317.4	16378.1	10970.5	33105	667856	22314.9	24590.1	31585.2	51832.9	45784.1	31962.9	27616.9	14767.5	3743.99	4632.43	4553.09	23783.5	5319.51	7245.62	3134.38	6435.49	5826.11	9400.72	7987.56	88945.5	89143	88006.7	84284.3	89294.4	89293	-	-	7408481	16691-00-2	-	-	-
MEDP2446	cyclo(pro-pro)	环(脯氨酸-脯氨酸)	Amino acid and Its metabolites	氨基酸及其代谢物	Small Peptide	小肽	195.1	194.106	[M+H]+	C10H14N2O2	411118	209929	472268	160526	25273.2	51197.3	49985.4	130236	171055	89549.7	62093.2	35479.4	92087.3	1.90942e+06	1.32236e+06	1.46361e+06	735149	388917	546571	270730	312780	138350	291314	192358	249459	249679	250353	251148	251143	248579	-	-	529063	-	-	-	-
MEDN1940	γ-Glu-Gln	γ-L-谷氨酸-L-谷氨酰胺	Amino acid and Its metabolites	氨基酸及其代谢物	Small Peptide	小肽	274.1	275.112	[M-H]-	C10H17N3O6	29398	31691	33005.3	42156	35279.1	35952.8	18421.4	14263	21544.2	13542	15917.1	14953.1	15117.7	12918.6	1.84704	9160.82	2052.97	8613.29	9382.58	10591.7	11363.2	1.84704	4955.35	9263.6	44992.7	45207.2	45737.7	45752.9	45761.3	44545.7	C05283	HMDB0011738	150914	10148-81-9	73707	-	-
MEDN0074	γ-Glu-Cys	γ-L-谷氨酸-L-半胱氨酸	Amino acid and Its metabolites	氨基酸及其代谢物	Small Peptide	小肽	249.1	250.062	[M-H]-	C8H14N2O5S	31827.8	17971.5	15074.8	44332.9	71945	34230.9	7731.76	9119.32	6355.52	15241.8	19176.3	26629.1	64830.9	37927.1	35150.9	28516.5	47115.6	38960.8	10745.1	8280.99	8098.63	7155.33	5448.86	15413.7	21805.6	21726.8	21961.7	21502.9	21500.8	23386.5	C00669	HMDB0001049	123938	636-58-8	17515	5966	ko00480,ko01100,ko01240,ko04216
MEDN2207	10-Hydroxystearic Acid	10-羟基硬脂酸	FA	脂肪酰类	Oxidized lipids	氧化脂质	299.3	300.266	[M-H]-	C18H36O3	1.91159	1.91159	1.91159	1.91159	1.91159	1.91159	588529	644436	119506	509065	312957	197142	90499.6	80743.5	173761	153924	232901	173606	275577	129774	77077.6	66615.5	290087	469959	186610	186673	177071	183777	185234	185506	-	HMDB0037396	9561835	638-26-6	-	-	-
MEDN1081	12,13-DiHOME	12,13-二羟基-9Z-十八烯酸	FA	脂肪酰类	Oxidized lipids	氧化脂质	313.2	314.246	[M-H]-	C18H34O4	8.34909	8.34909	8.34909	8.34909	8.34909	8.34909	59731	66745.1	9535.41	57410	26874.8	31519.2	5117.2	5.00404	14272.5	13918.1	9563.65	21559.6	46544	6687.31	7602.1	5.00404	39161.8	77703.9	25830.4	26180	25843.7	25791.7	25804.4	27024.2	-	-	10236635	263399-35-5	-	-	-
MEDN0767	12,13-EpOME	(±)12(13)环氧-9Z-十八碳烯酸	FA	脂肪酰类	Oxidized lipids	氧化脂质	295.2	296.235	[M-H]-	C18H32O3	3.38902	3.38902	3.38902	3.38902	3.38902	3.38902	17862.1	14902.2	3423.65	18460	9747.99	6507.39	5.55817	5.55817	5.55817	5.55817	5.55817	5.55817	13619.9	12739.7	14629.7	5.55817	19042.1	23273.8	19183.7	18409.2	18791.7	18897.5	18820.3	18897.4	C14826	HMDB0004702	5356421	-	38299	-	ko00591,ko01100
MEDN1035	13(R)-HODE	13R-羟基-9Z,11E-十八碳二烯酸	FA	脂肪酰类	Oxidized lipids	氧化脂质	295.2	296.235	[M-H]-	C18H32O3	3067.68	5531.23	2693.18	6984.75	4558.66	5655.02	121425	160708	26331.7	124345	54735.6	43634.3	4403.1	3604.84	5577.34	4522.57	9692.19	7881.08	15046	4939.28	4850.83	3652.94	15861	21949.3	98733.8	99095.2	99120.6	98677.8	98672.3	99238.1	-	-	13723970	10219-69-9	-	-	-
MEDN0375	13-HOTrE	13S-羟基-9Z,11E,15Z-十八碳三烯酸	FA	脂肪酰类	Oxidized lipids	氧化脂质	293.2	294.1	[M-H]-	C18H30O3	4.94541	4.94541	4.94541	4.94541	4.94541	4.94541	4842.16	9456.94	2397.53	5701.08	2686.75	3446.77	2.24369	2.24369	2.24369	2.24369	2.24369	2.24369	3501.81	1583.08	615.541	495.028	3451.34	3410.42	4585.27	4600.43	4661.93	4580.37	4583.66	4665.55	-	HMDB0010203	10469728	87984-82-5	72641	-	-
MEDN1426	9(S),12(S),13(S)-TriHOME	9,12,13-三羟基-十八碳单烯酸	FA	脂肪酰类	Oxidized lipids	氧化脂质	329.2	330.241	[M-H]-	C18H34O5	7586.72	8823.17	5488.05	11465.3	6787.19	5537.55	15336.3	25218.7	6837.3	11125.6	12339.5	10642.3	2398.56	1620.78	2009.56	2455.26	3613.11	2230.25	3112.29	1907.75	2023.16	2143.89	3967.44	4562.88	24365.9	24380	24695.5	24598.7	24573.6	24453.3	C14833	HMDB0004708	9858729	97134-11-7	34506	-	ko00591
MEDN0376	9,10-DiHOME	(±)9,10-二羟基-12Z-十八碳烯酸	FA	脂肪酰类	Oxidized lipids	氧化脂质	313.2	314.246	[M-H]-	C18H34O4	6281.57	12232.1	10025.3	11283.9	6729.25	12516	351513	352544	46949.9	361917	183663	116750	8060.97	12070.4	26278.4	23649.2	23903.6	36395.7	112532	13740.7	24351.5	8289.08	138111	255079	138904	138364	138960	137391	138940	138942	C14828	HMDB0004704	9966640	-	-	-	ko00591
MEDN0783	9,10-EpOME	(±)9,10-环氧-12Z-十八碳烯酸	FA	脂肪酰类	Oxidized lipids	氧化脂质	295.2	296.235	[M-H]-	C18H32O3	3.38902	3.38902	3.38902	3.38902	3.38902	3.38902	17862.1	14902.2	3423.65	18460	9747.99	6507.39	5.55817	5.55817	5.55817	5.55817	5.55817	5.55817	13619.9	12739.7	14629.7	5.55817	19042.1	23273.8	19183.7	18409.2	18791.7	18897.5	18820.3	18897.4	-	-	-	-	-	-	-
MEDN0398	AA	花生四烯酸	FA	脂肪酰类	Oxidized lipids	氧化脂质	303.2	304.24	[M-H]-	C20H32O2	18839.7	14760	33215.7	13527.5	33684.1	22220.3	24444.4	28596.4	21082.1	23245.6	16858.8	17461.3	19900.1	14194	13914.2	12332.4	34730.4	17284.7	13932.1	10333.7	8079.58	5744.03	14911.9	18948.2	90635.9	83583.2	83415.3	86526.1	84071.4	84009	C00219	HMDB0001043	444899	506-32-1	15843	193	ko00590,ko00591,ko01040,ko01100,ko04216,ko04217,ko04270,ko04611,ko04664,ko04666,ko04723,ko04726,ko04730,ko04745,ko04750,ko04912,ko04913,ko04921,ko04923,ko04925,ko05140,ko05146
MEDN0390	EPA	二十碳五烯酸	FA	脂肪酰类	Oxidized lipids	氧化脂质	301.2	302.22	[M-H]-	C20H30O2	11130	9641.52	11165.5	9764.82	18263.3	11081.2	18294.4	17694	15074.2	16926.7	12395.1	14386.8	12772.9	13019.1	10865.8	11384.3	23977.3	11909.7	8250.76	4729.63	5990.39	3030.19	10637.7	9982.78	61264.2	58513	58329.1	60024.4	59902.4	60240.1	C06428	HMDB0001999	446284	10417-94-4	28364	6423	ko01040
MEDP1127	1-acetylindole	1-乙酰吲哚	Heterocyclic compounds	杂环化合物	Indole and Its derivatives	吲哚及其衍生物	160.1	159.068	[M+H]+	C10H9NO	79271.5	284062	420194	210649	38710.6	221082	223296	126525	183307	167609	75068.3	367923	36596.6	162330	76573.5	57160.9	33738.2	229394	9106.5	8195.13	22307.1	14095.7	22682.5	12421.3	389862	442801	443600	432640	422831	422510	-	-	68470	576-15-8	-	-	-
MEDP0270	3-Indolebutyric Acid	吲哚-3-丁酸	Heterocyclic compounds	杂环化合物	Indole and Its derivatives	吲哚及其衍生物	204.1	203.095	[M+H]+	C12H13NO2	8.38588e+06	9.20138e+06	1.04333e+07	9.45437e+06	8.87937e+06	9.2513e+06	1.05904e+07	9.86592e+06	9.6108e+06	9.70946e+06	9.7323e+06	9.81494e+06	9.40864e+06	1.18592e+07	1.28891e+07	1.54647e+07	1.30615e+07	1.70644e+07	1.26131e+07	1.40168e+07	1.57561e+07	1.46974e+07	1.63464e+07	1.30932e+07	8.57e+06	9.79928e+06	9.76423e+06	9.5348e+06	9.37193e+06	9.37054e+06	C11284	HMDB0002096	8617	133-32-4	33070	6485	-
MEDN1090	Dioxindole	二羟吲哚	Heterocyclic compounds	杂环化合物	Indole and Its derivatives	吲哚及其衍生物	148	149.048	[M-H]-	C8H7NO2	906815	626185	398370	1.06576e+06	228709	580487	2.38068e+06	1.92619e+06	2.24716e+06	1.69737e+06	1.37411e+06	2.06732e+06	1.19029e+06	3.08381e+06	2.98423e+06	2.77432e+06	2.11318e+06	1.26753e+06	808510	607373	869074	403865	738995	720319	1.68507e+06	1.66432e+06	1.68524e+06	1.68121e+06	1.67669e+06	1.68458e+06	C05578	-	114683	3131-52-0	-	-	ko00350,ko01100
MEDN0562	Indole 3-carbinol	吲哚-3-甲醇	Heterocyclic compounds	杂环化合物	Indole and Its derivatives	吲哚及其衍生物	146.1	147.068	[M-H]-	C9H9NO	7.38539e+06	7.7574e+06	7.62071e+06	7.57295e+06	7.3962e+06	7.86294e+06	8.06012e+06	8.06258e+06	8.21783e+06	8.15514e+06	8.27094e+06	8.28373e+06	1.01568e+07	1.03474e+07	1.04502e+07	1.05229e+07	9.86759e+06	1.07054e+07	1.02324e+07	1.10189e+07	1.0833e+07	1.12945e+07	1.12142e+07	1.10003e+07	6.94638e+06	6.94639e+06	6.93298e+06	6.93112e+06	6.93096e+06	6.96054e+06	-	HMDB0005785	3712	700-06-1	24814	-	-
MEDN0265	Indole-2-Carboxylic Acid	2-吲哚甲酸	Heterocyclic compounds	杂环化合物	Indole and Its derivatives	吲哚及其衍生物	160	161.048	[M-H]-	C9H7NO2	485513	455243	553902	686414	403257	490181	189942	194856	224965	200071	157781	193504	319640	666641	675828	505818	486339	382043	445586	433188	400630	289625	420868	387182	381098	382190	380025	379221	387579	379211	-	HMDB0002285	72899	1477-50-5	130363	6593	-
MEDP0529	Indole-3-acetamide	吲哚-3-乙酰胺	Heterocyclic compounds	杂环化合物	Indole and Its derivatives	吲哚及其衍生物	175.1	174.079	[M+H]+	C10H10N2O	61338.6	121905	265309	207373	479067	97651.3	405446	183950	318896	132057	535910	233545	257486	48441.8	204455	39469.3	971675	162830	84147.3	183222	165025	414170	128145	301819	272071	273007	257714	272104	251443	272243	C02693	HMDB0029739	397	879-37-8	16031	-	ko00380,ko01100
MEDN0523	Indole-3-lactic acid	3-吲哚-乳酸	Heterocyclic compounds	杂环化合物	Indole and Its derivatives	吲哚及其衍生物	204.1	205.074	[M-H]-	C11H11NO3	9.39395e+06	9.68307e+06	9.64316e+06	8.31441e+06	7.88362e+06	9.04383e+06	1.29534e+07	1.28231e+07	1.40012e+07	1.40537e+07	1.47506e+07	1.45458e+07	2.80195e+07	2.41156e+07	2.02628e+07	1.73612e+07	8.78991e+06	8.77114e+06	1.20868e+07	1.42208e+07	1.14618e+07	1.41564e+07	1.34471e+07	1.23494e+07	1.01672e+07	9.56236e+06	1.00865e+07	9.60435e+06	9.62063e+06	1.01597e+07	C02043	HMDB0000671	92904	1821-52-9	24813	5641	-
MEDN1409	12-Hydroxyoctadecanoic acid	12-羟基硬脂酸	FA	脂肪酰类	FFA	游离脂肪酸	299.3	300.266	[M-H]-	C18H36O3	39509.1	22602	20613.5	26164	16935.5	16499.4	210228	220246	50153.2	165319	113333	60674.6	11310.9	3.58632	14284.4	3489.56	22002.5	28072	91310	16737.7	20023.6	11407.3	91034.2	166212	72851.4	71762.8	71758.4	72195.4	72194	72947.1	-	HMDB0061706	7789	106-14-9	85208	-	-
MEDN1112	16-Hydroxyhexadecanoic acid	16-羟基十六酸	FA	脂肪酰类	FFA	游离脂肪酸	271.2	272.235	[M-H]-	C16H32O3	17416.6	22897.2	15224.8	21779.4	22127.9	18711.3	37304.8	34318.5	24857.7	31643.8	33436.2	25936.3	27821.1	23783.5	19376.3	20633.7	38459.9	22247	33019.9	27804.3	34069.4	50475.2	27742.5	25805.9	29242.6	27634.6	27705.3	29176.8	28317.1	28318.7	C18218	HMDB0006294	10466	506-13-8	55328	-	ko01100
MEDN1148	2-hydroxyhexadecanoic acid	2-羟基十六酸	FA	脂肪酰类	FFA	游离脂肪酸	271.2	272.235	[M-H]-	C16H32O3	17416.6	22897.2	15224.8	21779.4	22127.9	18711.3	37304.8	34318.5	24857.7	31643.8	33436.2	25936.3	27821.1	23783.5	19376.3	20633.7	38459.9	22247	33019.9	27804.3	34069.4	50475.2	27742.5	25805.9	29242.6	27634.6	27705.3	29176.8	28317.1	28318.7	D84003	HMDB0031057	92836	764-67-0	75972	-	-
MEDN0494	8,15-Dihete	8,15-二羟基二十碳四烯酸	FA	脂肪酰类	FFA	游离脂肪酸	335.2	336.23	[M-H]-	C20H32O4	3972.52	2606.29	2876.67	7499.38	7571.76	7656.66	71668.3	127953	35684.6	109111	39793.6	36029.1	24132.6	16592.1	24346.8	17583.6	72213.6	36547.9	86512.9	19705	21661.2	17654.6	46973	104340	78889.2	67983.7	67786.6	71326.4	68293.7	71206.4	-	HMDB0010219	53480358	80234-65-7	88456	-	-
MEDN1854	9,10-dihydroxystearic acid	9,10-二羟基硬脂酸	FA	脂肪酰类	FFA	游离脂肪酸	315.3	316.261	[M-H]-	C18H36O4	126857	143479	117035	135321	141464	118329	220494	290419	166368	242245	198022	177729	164751	164834	153928	176066	184596	187652	189146	181920	178796	199073	187468	242069	208439	211265	211250	209403	209858	211287	C19622	-	89377	120-87-6	-	-	-
MEDN0311	Dodecanedioic Acid	十二烷二酸	FA	脂肪酰类	FFA	游离脂肪酸	229.1	230.152	[M-H]-	C12H22O4	247970	256893	249989	246707	272758	262225	530274	550536	279873	421257	312522	354399	156183	276852	187096	223238	239852	290956	357996	300283	301478	210582	430587	454142	326697	329929	330014	328515	328930	326843	C02678	HMDB0000623	12736	693-23-2	4676	5596	-
MEDN0396	FFA(10:0)	癸酸	FA	脂肪酰类	FFA	游离脂肪酸	171.1	172.15	[M-H]-	C10H20O2	7728.47	5411.82	5992.02	10184.7	10931.1	9696.1	16044.9	34879.1	10639.7	31280.9	14174.9	10176	10983.3	11273.8	19151.8	13768.4	71116.3	20517.1	20653.2	8163.58	9896.54	1.87433	11706.2	32572.3	55176.7	55281.6	55058.5	55461.2	54862.7	55454.2	C01571	HMDB0000511	2969	334-48-5	30813	336	ko00061,ko01100
MEDN0385	FFA(12:0)	月桂酸	FA	脂肪酰类	FFA	游离脂肪酸	199.2	200.17	[M-H]-	C12H24O2	5.72289e+06	3.74991e+06	3.97668e+06	8.59623e+06	8.86747e+06	8.36866e+06	2.62557e+07	6.93696e+07	1.3996e+07	6.87545e+07	2.32378e+07	1.50763e+07	1.00493e+07	8.72431e+06	1.53995e+07	1.15369e+07	5.74679e+07	1.2081e+07	3.17753e+07	8.91336e+06	7.96686e+06	3.65803e+06	2.26192e+07	5.58433e+07	4.02135e+07	4.02778e+07	4.00496e+07	3.96243e+07	4.02319e+07	4.02318e+07	C02679	HMDB0000638	3893	143-07-7	30805	5611	ko00061,ko01100
MEDN0807	FFA(14:0)	肉豆蔻酸	FA	脂肪酰类	FFA	游离脂肪酸	227.2	228.209	[M-H]-	C14H28O2	18194.7	13104.5	12441.8	26569.7	21965.1	21531.7	96587.5	190033	43434.5	155087	71338.7	53290.2	37612.8	20904.3	50391.6	36515.6	137392	44413.4	123076	35782.1	42491.4	17389.3	101407	171887	87240.3	87226.2	84700.6	86457.9	87037.4	87036.9	C06424	HMDB0000806	11005	544-63-8	28875	196	ko00061,ko01100
MEDN1159	FFA(15:1)	顺-1-十五烯酸	FA	脂肪酰类	FFA	游离脂肪酸	239.2	240.209	[M-H]-	C15H28O2	194545	276400	23201.2	114045	353362	15495.4	102326	225590	263281	104974	218629	169158	860552	948861	882798	889967	776287	1.08719e+06	870207	1.0044e+06	995555	1.09124e+06	953698	776319	748425	748794	702738	736149	741970	744246	-	-	5312411	84743-29-3	-	-	-
MEDN0381	FFA(16:0)	十六烷酸	FA	脂肪酰类	FFA	游离脂肪酸	255.2	256.24	[M-H]-	C16H32O2	2.34073e+07	2.12096e+07	2.08356e+07	2.87227e+07	2.56153e+07	3.05348e+07	6.06162e+07	7.34335e+07	3.58404e+07	7.04495e+07	4.66153e+07	3.86733e+07	2.50732e+07	1.96179e+07	3.31258e+07	2.56143e+07	4.52952e+07	3.52259e+07	4.42419e+07	2.77092e+07	2.46415e+07	2.38906e+07	4.02929e+07	5.63675e+07	5.65867e+07	4.95908e+07	4.95022e+07	5.16601e+07	5.22547e+07	5.16502e+07	C00249	HMDB0000220	985	57-10-3	15756	187	ko00061,ko00062,ko00071,ko01040,ko01100,ko01212
MEDN1805	FFA(16:1)	棕榈油酸	FA	脂肪酰类	FFA	游离脂肪酸	253.2	254.225	[M-H]-	C16H30O2	315681	176679	252203	639262	1.55107e+06	1.3707e+06	5.94739e+06	1.19889e+07	2.87821e+06	1.05186e+07	3.55694e+06	3.15059e+06	2.11701e+06	1.28442e+06	2.39803e+06	1.61504e+06	6.14868e+06	3.6048e+06	8.03481e+06	1.67956e+06	2.2279e+06	1.53544e+06	5.57099e+06	1.15521e+07	7.63592e+06	7.54394e+06	7.4288e+06	7.62547e+06	7.46528e+06	7.44496e+06	C08362	HMDB0003229	445638	373-49-9	28716	188	ko00061,ko01100
MEDN0383	FFA(18:2)	亚油酸	FA	脂肪酰类	FFA	游离脂肪酸	279.2	280.24	[M-H]-	C18H32O2	554898	265925	244723	688678	1.04326e+06	1.00758e+06	4.74813e+06	7.51946e+06	1.96032e+06	6.82229e+06	3.67491e+06	2.59063e+06	682072	590448	869193	696593	2.75328e+06	1.98754e+06	1.88267e+06	644912	719648	437170	1.64878e+06	3.25266e+06	8.21655e+06	7.26499e+06	7.16273e+06	7.5214e+06	7.56662e+06	7.52127e+06	C01595	HMDB0000673	5280450	60-33-3	17351	191	ko00591,ko01040,ko01100
MEDN0378	FFA(18:3)	γ-亚麻酸(C18:3)	FA	脂肪酰类	FFA	游离脂肪酸	277.2	278.22	[M-H]-	C18H30O2	18862.4	17405.4	14412.7	14075.1	26055.3	23226.3	42492.8	74004.9	27748.7	62771.3	33216.3	23690.2	5.98269	5.98269	5.98269	5.98269	5.98269	5.98269	52877.9	5.98269	56546.3	26348	46661.7	59116.6	61218.8	61394.7	59377	60766.2	60043.7	60767.8	C06426	HMDB0003073	5280933	506-26-3	28661	386	ko00591,ko01040,ko01100
MEDN0399	FFA(20:0)	花生酸	FA	脂肪酰类	FFA	游离脂肪酸	311.3	312.3	[M-H]-	C20H40O2	114548	119207	111322	118548	120615	113041	104539	102878	117180	110116	115504	109251	51788.3	104616	108427	125469	93963.6	60160.8	108295	90957.3	135703	125675	95775.4	97490.5	111284	110824	103330	108485	109391	109196	C06425	HMDB0002212	10467	506-30-9	28822	401	ko01040
MEDN0658	Hexadecanedioic acid	十六烷二酸	FA	脂肪酰类	FFA	游离脂肪酸	285.2	286.214	[M-H]-	C16H30O4	460351	84073.1	91376.3	85098.3	88232.4	91772.8	116980	157872	88646.3	144544	99894.7	113886	116922	82270.2	73526.5	47953.2	106609	65464.1	102432	87271.2	56102.1	40486.7	64825.6	108052	143063	143068	142576	142905	142104	142905	C19615	HMDB0000672	10459	505-54-4	73722	5642	ko01100
MEDN1840	Pinolenic acid	皮诺敛酸	FA	脂肪酰类	FFA	游离脂肪酸	277.2	278.225	[M-H]-	C18H30O2	7313.54	2640.95	5468.38	5960.73	6278.67	8027.16	17358.9	30479.1	7137.44	21304.9	17343.8	10818.4	7168.12	5321.26	12175.2	9109.51	26423	18892.3	19658	7024.41	7661.33	9102.79	17615.6	25625.7	26068.3	25468.6	25448.1	25363.7	25373.1	26075.6	-	-	5312495	16833-54-8	-	-	-
MEDN0604	Tetradecanedioic acid	十四烷二酸	FA	脂肪酰类	FFA	游离脂肪酸	257.2	258.183	[M-H]-	C14H26O4	82905.4	90193.3	106341	106224	92281.6	109239	110385	134957	100827	136856	111135	144253	110133	95334.4	104368	105365	131752	121183	133637	118288	134459	105496	139094	138820	109086	109100	110630	110149	110148	109271	C11002	HMDB0000872	13185	821-38-5	76308	5833	-
MEDN1406	Tridecanedioic acid	十三烷二酸	FA	脂肪酰类	FFA	游离脂肪酸	243.2	244.167	[M-H]-	C13H24O4	433174	359518	421187	448831	391024	394529	413657	502433	347771	393300	400986	441767	468063	539460	494996	507134	487399	524663	476116	536929	491084	440916	458548	445648	428516	433946	433932	431518	431518	431036	-	-	10458	505-52-2	-	-	-
MEDN1875	(+)-Ds-Threo-Isocitrate	(+)-Ds-苏式-异柠檬酸	Organic acid And Its derivatives	有机酸及其衍生物	Organic acid And Its derivatives	有机酸及其衍生物	191	192.12	[M-H]-	C6H8O7	212318	138979	404302	165157	179261	110777	370722	282022	342647	231647	326369	587520	118012	164272	128055	179806	109132	95918.3	284092	187227	309208	522524	277568	253526	220563	222049	222039	224772	216533	221928	-	-	23688910	20226-99-7	-	-	-
MEDP0823	(R)-2-Hydroxy-3-phenylpropionic acid	(R)-(+)-3-苯乳酸	Organic acid And Its derivatives	有机酸及其衍生物	Organic acid And Its derivatives	有机酸及其衍生物	167	166.063	[M+H]+	C9H10O3	9.27934e+06	8.67358e+06	9.25536e+06	8.40187e+06	9.19739e+06	9.07776e+06	1.02835e+07	1.03458e+07	9.83629e+06	1.07038e+07	1.05778e+07	1.0187e+07	1.65581e+07	1.395e+07	1.47396e+07	1.57377e+07	1.3712e+07	1.45357e+07	1.68061e+07	1.89911e+07	1.88558e+07	1.86554e+07	1.86038e+07	1.46478e+07	8.40407e+06	8.5126e+06	8.51155e+06	8.42055e+06	8.41956e+06	8.50017e+06	C05607	HMDB0000563	643327	7326-19-4	43065	5547	ko00360,ko01100
MEDN2091	(R)-2-Hydroxybutyric acid	（R） -2-羟基丁酸	Organic acid And Its derivatives	有机酸及其衍生物	Organic acid And Its derivatives	有机酸及其衍生物	103	104.1	[M-H]-	C4H8O3	414814	199484	192891	271322	465909	202232	893403	507558	360448	431144	305505	405335	239095	230484	266121	286017	1.15624e+06	211807	305312	156045	161321	239230	166157	180207	419845	414481	421051	415084	415176	424057	-	-	449265	20016-85-7	-	-	-
MEDN1493	3-Hydroxybutanoic acid	3-羟基丁酸	Organic acid And Its derivatives	有机酸及其衍生物	Organic acid And Its derivatives	有机酸及其衍生物	103	104.047	[M-H]-	C4H8O3	1.75202e+06	904340	1.39226e+06	1.14612e+06	1.51142e+06	724429	3.13468e+06	1.73268e+06	1.43795e+06	2.03773e+06	1.51398e+06	2.30606e+06	887857	984672	1.10113e+06	848111	2.02046e+06	1.48521e+06	3.73481e+06	1.95998e+06	1.87027e+06	5.29416e+06	2.68523e+06	2.66072e+06	2.01999e+06	2.02937e+06	2.04442e+06	2.02859e+06	2.04527e+06	2.02854e+06	C01089	HMDB0000011	441	300-85-6	17066	-	ko00650,ko01100,ko04024
MEDN1886	(S)-2-Hydroxy-3-phenylpropanoic acid	（S）-2-羟基-3-苯丙酸	Organic acid And Its derivatives	有机酸及其衍生物	Organic acid And Its derivatives	有机酸及其衍生物	165.1	166.063	[M-H]-	C9H10O3	10594.9	15358.1	10824	8493.93	8997.03	6889.13	21609.5	10858.1	52484.1	5699.27	40178.6	9559.29	4156.43	25831.9	28010.6	23794.5	25529.2	13958.2	2.42937	2.37132	2.32547	2.25886	2.41418	2.22532	17528.8	16249.5	16598.3	16892.2	16892.8	17440.7	C05607	-	444718	20312-36-1	-	-	ko00360,ko01100
MEDN1328	(S)-Leucic acid	L-alpha-羟基异己酸	Organic acid And Its derivatives	有机酸及其衍生物	Organic acid And Its derivatives	有机酸及其衍生物	131	132.079	[M-H]-	C6H12O3	43375	8100.31	56972.7	45440.9	51305.3	80063.8	74086.4	58045.4	58769.8	89455.2	109226	118296	18836.4	69864.1	120000	82577.3	60477.6	63458.2	0.817765	0.817765	0.817765	0.817765	0.817765	0.817765	154979	154928	155091	154945	155112	154946	-	HMDB0000746	83697	13748-90-8	44510	5714	-
MEDN1299	1-Aminocyclohexanecarboxylic acid	1-氨基环己甲酸	Organic acid And Its derivatives	有机酸及其衍生物	Organic acid And Its derivatives	有机酸及其衍生物	142.1	143.095	[M-H]-	C7H13NO2	1157.23	2893.32	4718.17	1536.68	5.05817	3361.97	4030.85	3586.86	1536.68	1700.92	749.407	4350.04	1516.17	9053.88	2775.41	2555.27	1366.82	8110.09	347.09	570.431	545.103	224.328	472.058	672.322	7614.21	7642.46	7739.52	7716.01	7606.44	7716.78	-	-	1366	2756-85-6	-	-	-
MEDP1247	1-Deoxyvaleric acid	1-脱氧淀粉酸	Organic acid And Its derivatives	有机酸及其衍生物	Organic acid And Its derivatives	有机酸及其衍生物	235.2	234.162	[M+H]+	C15H22O2	1.9061e+06	1.97886e+06	1.9244e+06	1.98159e+06	1902454	1.98526e+06	1.84169e+06	1.94048e+06	1.84023e+06	1.79148e+06	1.83965e+06	1.93325e+06	2.18158e+06	2.04717e+06	2.11787e+06	2.05517e+06	2.06027e+06	2.05287e+06	2.06035e+06	2.13707e+06	1.97159e+06	2.01381e+06	1.98434e+06	1.93077e+06	1.89743e+06	1.89744e+06	1.88564e+06	1.90326e+06	1.88798e+06	1.88783e+06	C20404	-	71448993	-	-	-	ko01100
MEDN0689	2,5-Furandicarboxylicacid	2,5-呋喃二羧酸	Organic acid And Its derivatives	有机酸及其衍生物	Organic acid And Its derivatives	有机酸及其衍生物	155	156.006	[M-H]-	C6H4O5	186427	179332	58150.4	134499	109189	148655	77142.3	112752	83037	177759	170046	154893	121616	109985	122518	110765	146266	129641	121238	106752	113580	91498.3	100737	131255	155906	152975	153064	149130	157941	149916	C20450	HMDB0004812	76720	3238-40-2	84212	7076	-
MEDP0430	L-2-Aminoadipate	L-2-氨基己二酸	Organic acid And Its derivatives	有机酸及其衍生物	Organic acid And Its derivatives	有机酸及其衍生物	162.1	161.069	[M+H]+	C6H11NO4	331932	1.10171e+06	758654	243073	46444	329640	256531	139768	162319	230913	129623	201145	211169	183075	337228	272958	577713	266704	310616	375651	270405	600038	327771	295373	319959	319830	288882	321950	304034	322868	C00956	HMDB0000510	92136	1118-90-7	37024	5496	ko00300,ko00310,ko00311,ko01100,ko01210,ko01230
MEDN1320	2-Hydroxy-2-Methyl Butyric acid	2-羟基-2-甲基丁酸	Organic acid And Its derivatives	有机酸及其衍生物	Organic acid And Its derivatives	有机酸及其衍生物	117	118.063	[M-H]-	C5H10O3	66616.6	43135.9	47604.7	41742.5	37524.1	34572.8	75939.4	81796.9	78004.7	94449.5	56533	57761.2	54141.8	60714.6	79219	63470.8	71625.7	62366.3	96727.8	73286.1	80881.6	54445.4	59065.9	109967	53720.2	53362.4	53718.6	53735.8	53423.3	53737.6	-	HMDB0001987	95433	3739-30-8	68454	6416	-
MEDN2009	2-Hydroxy-3-Methyl Butanoic Acid	2-羟基-3-甲基丁酸	Organic acid And Its derivatives	有机酸及其衍生物	Organic acid And Its derivatives	有机酸及其衍生物	117.1	118.063	[M-H]-	C5H10O3	55098.7	38486.8	31544.4	73243.5	76879	76715.3	185419	150093	77800.3	289948	178017	144907	16274.1	251952	276566	219968	199445	160425	58313	22211.3	25122.1	55325.3	30363.1	25770.2	144879	144155	143640	144378	144185	144378	-	-	99823	4026-18-0	-	-	-
MEDN1498	2-Hydroxyadipic acid	2-羟基己二酸	Organic acid And Its derivatives	有机酸及其衍生物	Organic acid And Its derivatives	有机酸及其衍生物	161	162.053	[M-H]-	C6H10O5	262097	319493	166117	251686	254701	145231	9.84714	9.84714	9.84714	9.84714	9.84714	9.84714	138671	96598.2	137385	111016	149979	94241.6	201008	222509	144557	130012	73619.7	270693	129235	134728	135095	133504	127428	133533	C02360	HMDB0000321	193530	18294-85-4	17023	5310	-
MEDN0283	2-Hydroxybutanoic Acid	2-羟基丁酸	Organic acid And Its derivatives	有机酸及其衍生物	Organic acid And Its derivatives	有机酸及其衍生物	103	104.047	[M-H]-	C4H8O3	1.75202e+06	904340	1.39226e+06	1.14612e+06	1.51142e+06	724429	3.13468e+06	1.73268e+06	1.43795e+06	2.03773e+06	1.51398e+06	2.30606e+06	887857	984672	1.10113e+06	848111	2.02046e+06	1.48521e+06	3.73481e+06	1.95998e+06	1.87027e+06	5.29416e+06	2.68523e+06	2.66072e+06	2.01999e+06	2.02937e+06	2.04442e+06	2.02859e+06	2.04527e+06	2.02854e+06	C05984	HMDB0000008	11266	600-15-7	1148	3783	ko00640
MEDN1311	2-Hydroxycaprylic acid	2-羟基辛酸	Organic acid And Its derivatives	有机酸及其衍生物	Organic acid And Its derivatives	有机酸及其衍生物	159	160.11	[M-H]-	C8H16O3	245755	217635	123869	210764	135013	118467	179526	112267	194930	181119	126268	181912	164943	119077	145084	144225	106673	103154	108808	130063	111522	109272	133951	102331	136401	137452	136392	139901	140308	123160	D81442	HMDB0000711	94180	617-73-2	86543	5679	-
MEDN1052	2-Hydroxyglutaric acid	(S)-2-羟基戊二酸	Organic acid And Its derivatives	有机酸及其衍生物	Organic acid And Its derivatives	有机酸及其衍生物	147	148.037	[M-H]-	C5H8O5	743822	2.26183e+06	937251	1.48176e+06	1.50445e+06	789639	3.58042e+06	3.58136e+06	2.15001e+06	2.5005e+06	2.86762e+06	3.22717e+06	677922	1.43218e+06	1.40502e+06	1.498e+06	1.28333e+06	989987	3.78128e+06	2.86117e+06	1.90503e+06	2.93326e+06	2.50752e+06	1.97602e+06	1.78222e+06	1.7823e+06	1.80485e+06	1.80001e+06	1.78626e+06	1.80137e+06	C03196	-	439939	13095-48-2	-	-	ko00310,ko01100
MEDN1499	2-Hydroxyhexanoic acid	2-羟基己酸	Organic acid And Its derivatives	有机酸及其衍生物	Organic acid And Its derivatives	有机酸及其衍生物	131.1	132.079	[M-H]-	C6H12O3	43375	8100.31	56972.7	45440.9	51305.3	80063.8	74086.4	58045.4	58769.8	89455.2	109226	118296	18836.4	69864.1	120000	82577.3	60477.6	63458.2	0.817765	0.817765	0.817765	0.817765	0.817765	0.817765	154979	154928	155091	154945	155112	154946	C11377	HMDB0001624	99824	6064-63-7	86542	6332	-
MEDN0284	2-Hydroxyisocaproic Acid	2-羟基-4-甲基戊酸	Organic acid And Its derivatives	有机酸及其衍生物	Organic acid And Its derivatives	有机酸及其衍生物	131.1	132.079	[M-H]-	C6H12O3	43375	8100.31	56972.7	45440.9	51305.3	80063.8	74086.4	58045.4	58769.8	89455.2	109226	118296	18836.4	69864.1	120000	82577.3	60477.6	63458.2	0.817765	0.817765	0.817765	0.817765	0.817765	0.817765	154979	154928	155091	154945	155112	154946	D87748	HMDB0000665	92779	498-36-2	59783	5635	-
MEDN1326	2-Methylglutaric Acid	2-甲基戊二酸	Organic acid And Its derivatives	有机酸及其衍生物	Organic acid And Its derivatives	有机酸及其衍生物	145	146.058	[M-H]-	C6H10O4	611086	446207	342088	437947	759280	329630	146211	130167	145670	176070	192839	161855	307318	282438	328660	214254	234603	181951	408316	295026	276927	308971	313803	390666	251906	258474	251922	254561	254594	258957	D91481	HMDB0000422	12046	18069-17-5	68567	5411	-
MEDN2068	2-Methyllactic acid	2-甲基乳酸	Organic acid And Its derivatives	有机酸及其衍生物	Organic acid And Its derivatives	有机酸及其衍生物	103	104.1	[M-H]-	C4H8O3	421289	50155.5	183312	241006	407764	191692	876778	474555	350557	405528	269328	393155	205241	202163	233393	251631	1.04629e+06	194320	279359	149942	136154	228659	168718	185745	375982	373374	375978	372475	372606	378151	C21297	-	11671	594-61-6	-	-	-
MEDN0285	2-Methylsuccinic Acid	甲基丁二酸	Organic acid And Its derivatives	有机酸及其衍生物	Organic acid And Its derivatives	有机酸及其衍生物	131	132.042	[M-H]-	C5H8O4	179685	105152	114569	129935	197706	75122.8	82655.1	97596.5	82703.1	88579.8	42016.2	76030.7	4.6059	4.6059	4.6059	4.6059	4.6059	4.6059	154492	113934	78071.8	113802	176725	160251	127252	127342	129391	128118	128862	127911	-	HMDB0001844	10349	498-21-5	91315	6344	-
MEDN1958	2-methyl citric acid	2-甲基柠檬酸	Organic acid And Its derivatives	有机酸及其衍生物	Organic acid And Its derivatives	有机酸及其衍生物	205	206.043	[M-H]-	C7H10O7	547662	567068	896680	443585	330879	345893	338443	345660	252429	225293	280088	272332	160815	487106	219597	364410	326459	197376	608710	636391	983627	210780	646539	595400	342028	336358	341917	335638	335705	342483	-	HMDB0000379	515	6061-96-7	30835	5368	-
MEDN0826	3-(3-Hydroxyphenyl)-3-hydroxypropanoic acid	3-(3-羟苯基)-3-羟基丙酸	Organic acid And Its derivatives	有机酸及其衍生物	Organic acid And Its derivatives	有机酸及其衍生物	181.1	182.058	[M-H]-	C9H10O4	92738.6	72737.7	43179.1	56213.3	89912.2	56648.3	2.77286	2.77286	2.77286	2.77286	2.77286	2.77286	7841.32	8846.64	8270.87	11846.8	10607.7	8038.81	1.32484	1.32484	1.32484	1.32484	1.32484	1.32484	58066	58369.3	58065.8	59892.9	57613	57642.5	-	HMDB0002643	102959	3247-75-4	86369	6729	-
MEDP2347	3-Guanidinopropionic acid	3-胍基丙酸	Organic acid And Its derivatives	有机酸及其衍生物	Organic acid And Its derivatives	有机酸及其衍生物	132.1	131.069	[M+H]+	C4H9N3O2	468483	763908	769030	1.65091e+06	452323	408239	1.21467e+06	1.83874e+06	1.07882e+06	1.04031e+06	1.60502e+06	1.93392e+06	536099	449133	494907	499494	595219	485996	459554	582557	544712	427661	569165	498683	475747	462378	468586	475912	475941	412686	C03065	HMDB0013222	67701	353-09-3	15968	-	-
MEDN0290	3-Hydroxy-3-Methyl Butyric Acid	3-羟基-3-甲基丁酸	Organic acid And Its derivatives	有机酸及其衍生物	Organic acid And Its derivatives	有机酸及其衍生物	117.1	118.063	[M-H]-	C5H10O3	184230	266705	460220	275972	415977	413569	123837	186558	243114	356580	179670	122093	293686	390422	295406	275139	312352	457085	286685	193467	219082	281189	316423	179415	357149	351270	351147	353176	355497	353185	C20827	HMDB0000754	69362	625-08-1	37084	5722	ko00280,ko01100
MEDN1504	3-Hydroxycinnamic acid	3-羟基肉桂酸	Organic acid And Its derivatives	有机酸及其衍生物	Organic acid And Its derivatives	有机酸及其衍生物	163	164.047	[M-H]-	C9H8O3	282395	280903	282936	224667	234181	246726	274429	297085	253642	259831	301546	237676	343741	286048	297833	316259	300953	325476	369236	420375	359122	376248	408502	364997	226458	227952	228481	228324	225780	228342	C12621	HMDB0001713	637541	14755-02-3	32357	305	ko00360,ko01100
MEDN0820	3-Hydroxyglutaric acid	3-羟基戊二酸	Organic acid And Its derivatives	有机酸及其衍生物	Organic acid And Its derivatives	有机酸及其衍生物	147	148.037	[M-H]-	C5H8O5	732311	1.272e+06	2.10277e+06	775127	1.51437e+06	827607	1.82293e+06	1.90854e+06	1.63349e+06	1.78006e+06	2.08806e+06	2.2126e+06	507448	941373	1.0438e+06	1.419e+06	936451	958097	3.23469e+06	2.47555e+06	2.26885e+06	3.16741e+06	2.68671e+06	2.34099e+06	1.64577e+06	1.64935e+06	1.66159e+06	1.62669e+06	1.62601e+06	1.67602e+06	-	HMDB0000428	181976	638-18-6	-	5417	-
MEDP1971	3-Methylcrotonyl Glycine	3-甲基-丁烯酰基-L-甘氨酸	Organic acid And Its derivatives	有机酸及其衍生物	Organic acid And Its derivatives	有机酸及其衍生物	158.1	157.074	[M+H]+	C7H11NO3	385901	710173	630411	1.32913e+06	923327	587482	114613	110708	99507.2	122805	109268	78865.2	965585	2.14562e+06	2.85355e+06	1.95182e+06	1.13753e+06	1.94058e+06	376256	584432	467252	1.38106e+06	675712	364638	427904	416091	415956	422167	420671	420676	C20828	HMDB0000459	169485	33008-07-0	68499	5447	-
MEDN2026	4-Acetylaminobenzoic acid	4-乙酰氨基苯甲酸	Organic acid And Its derivatives	有机酸及其衍生物	Organic acid And Its derivatives	有机酸及其衍生物	178.1	179.058	[M-H]-	C9H9NO3	1.15374e+08	9.68744e+07	124909918	1.64593e+08	1.01791e+08	1.09459e+08	4.23766e+07	3.85438e+07	4.81617e+07	3.52081e+07	3.0977e+07	3.63099e+07	6.78506e+07	147093910	1.46899e+08	123362455	1.15756e+08	8.54537e+07	1.10131e+08	1.01134e+08	9.18191e+07	6.62076e+07	1.09853e+08	1.01076e+08	9.11904e+07	9.09896e+07	9.11885e+07	9.09196e+07	9.09196e+07	9.12558e+07	-	-	19266	556-08-1	-	-	-
MEDP0296	4-Guanidinobutyric Acid	4-胍基丁酸	Organic acid And Its derivatives	有机酸及其衍生物	Organic acid And Its derivatives	有机酸及其衍生物	146.1	145.085	[M+H]+	C5H11N3O2	274484	897791	866153	924924	112218	894284	2.4336e+06	2.99258e+06	2.35873e+06	2.72362e+06	2.62226e+06	3.5316e+06	1.19211e+06	1.73589e+06	1.06175e+06	2.34197e+06	824350	1.34403e+06	1.61357e+06	1.72601e+06	1.69784e+06	1.40415e+06	2.19749e+06	2.15976e+06	1.30496e+06	1.40647e+06	1.30426e+06	1.30811e+06	1.32519e+06	1.30825e+06	C01035	HMDB0003464	500	463-00-3	15728	6938	ko00330,ko01100
MEDN0432	5-Hydroxyhexanoic Acid	5-羟基己酸	Organic acid And Its derivatives	有机酸及其衍生物	Organic acid And Its derivatives	有机酸及其衍生物	131.1	132.079	[M-H]-	C6H12O3	43375	8100.31	56972.7	45440.9	51305.3	80063.8	74086.4	58045.4	58769.8	89455.2	109226	118296	18836.4	69864.1	120000	82577.3	60477.6	63458.2	0.817765	0.817765	0.817765	0.817765	0.817765	0.817765	154979	154928	155091	154945	155112	154946	-	HMDB0000525	170748	185956-02-9	131434	5510	-
MEDN0299	Adipic Acid	己二酸	Organic acid And Its derivatives	有机酸及其衍生物	Organic acid And Its derivatives	有机酸及其衍生物	145.1	146.058	[M-H]-	C6H10O4	437956	281212	264460	334330	479470	236204	74236.2	84384.2	45735.2	93584.1	87619	76991.5	152066	208281	175799	170319	188619	110117	194509	195189	162443	233489	223229	179429	168552	168741	172655	170839	169522	171557	C06104	HMDB0000448	196	124-04-9	30832	115	ko01100
MEDN0032	Allantoin	尿囊素	Organic acid And Its derivatives	有机酸及其衍生物	Organic acid And Its derivatives	有机酸及其衍生物	157	158.044	[M-H]-	C4H6N4O3	176766	89321.9	188538	211896	128198	165125	65050.9	58416.8	58413.8	37876	44671.2	37862.4	34326.1	32070.7	40066.3	38102.1	42050.3	0.805237	0.805237	0.805237	0.805237	0.805237	0.805237	0.805237	74205.1	74207.3	75036.5	74102	78206.9	74073	C01551	HMDB0000462	204	97-59-6	15676	89	-
MEDP2002	Aminolevulinic acid	氨基酮戊酸	Organic acid And Its derivatives	有机酸及其衍生物	Organic acid And Its derivatives	有机酸及其衍生物	132.1	131.058	[M+H]+	C5H9NO3	1.90552e+06	1.91647e+06	3.67345e+06	1.82109e+06	272077	2.56992e+06	2.4292e+06	2.65267e+06	2.95989e+06	2.58588e+06	4.11136e+06	3.7782e+06	2.06364e+06	2.13963e+06	2.52555e+06	1.68684e+06	1.41822e+06	2.19692e+06	2.40337e+06	2.52081e+06	2.62845e+06	3.05207e+06	2.46089e+06	2.43766e+06	2.3439e+06	2.52887e+06	2.36691e+06	2.51219e+06	2.38939e+06	2.40663e+06	C00430	HMDB0001149	137	106-60-5	17549	6037	ko00260,ko00860,ko01100,ko01240,ko02010
MEDN0478	Aminomalonic Acid	氨基丙二酸	Organic acid And Its derivatives	有机酸及其衍生物	Organic acid And Its derivatives	有机酸及其衍生物	118	119.022	[M-H]-	C3H5NO4	291579	195604	265231	225632	504404	170291	286745	294773	312081	251152	306153	286750	312177	362668	437963	283318	283450	361884	127469	91741.8	95665.9	75474.2	116299	124571	325421	332076	332014	329278	336520	329312	C00872	HMDB0001147	100714	1068-84-4	17475	-	-
MEDN0499	Argininosuccinic acid	精氨基琥珀酸	Organic acid And Its derivatives	有机酸及其衍生物	Organic acid And Its derivatives	有机酸及其衍生物	289.1	290.123	[M-H]-	C10H18N4O6	5.55158e+06	1.91721e+07	1.61484e+07	1.15573e+07	3.09811e+06	1.09616e+07	1.0106e+07	2.16141e+07	1.1589e+07	1.44e+07	1.5283e+07	1.02195e+07	7.22338e+06	1.37338e+07	1.22827e+07	1.06545e+07	4.0645e+06	6.97165e+06	1.27763e+06	1.24092e+06	7.9605e+06	9.22883e+06	941361	322878	7.26778e+06	7.26791e+06	7.3419e+06	7.41923e+06	7.42734e+06	7.0916e+06	C03406	HMDB0000052	16950	2387-71-5	15682	5115	ko00220,ko00250,ko01100,ko01230
MEDN0300	Azelaic Acid	壬二酸	Organic acid And Its derivatives	有机酸及其衍生物	Organic acid And Its derivatives	有机酸及其衍生物	187.1	188.105	[M-H]-	C9H16O4	3.03631e+06	2.64859e+06	2.61586e+06	2.90102e+06	2.98303e+06	2.6539e+06	2.69799e+06	2.70611e+06	2.42361e+06	2.51148e+06	2.54822e+06	2.59145e+06	1.57576e+06	1.78136e+06	1.4758e+06	1.68807e+06	1.64867e+06	1.59053e+06	1.91414e+06	1.67678e+06	1.77355e+06	1.87457e+06	1.66924e+06	1.67774e+06	2.80669e+06	2.79587e+06	2.80279e+06	2.82108e+06	2.79825e+06	2.79822e+06	C08261	HMDB0000784	2266	123-99-9	48131	5750	-
MEDN0301	Caffeic Acid	咖啡酸	Organic acid And Its derivatives	有机酸及其衍生物	Organic acid And Its derivatives	有机酸及其衍生物	179	180.042	[M-H]-	C9H8O4	1.12116e+07	9.47736e+06	1.19313e+07	1.61404e+07	9.8882e+06	1.05681e+07	4.43243e+06	3.91888e+06	4.48005e+06	3.54419e+06	3.14965e+06	3.52484e+06	6.61373e+06	1.44824e+07	1.50102e+07	1.17487e+07	1.06712e+07	8.18466e+06	1.06544e+07	9.48323e+06	8.54948e+06	6.33068e+06	1.02539e+07	9.6678e+06	8.62527e+06	8.63955e+06	8.69508e+06	8.65315e+06	8.66693e+06	8.66695e+06	C01481	HMDB0001964	1549111	331-39-5	16433	-	-
MEDN0203	Cis-Aconitic Acid	乌头酸	Organic acid And Its derivatives	有机酸及其衍生物	Organic acid And Its derivatives	有机酸及其衍生物	173	174.016	[M-H]-	C6H6O6	55188.1	25319.8	33025.7	27818.2	31926.3	24116.3	19819.4	23127.9	29737.3	9915.74	23131.2	26422.5	34455.8	37158.6	37203.5	38246.3	39265.2	32427.7	41395.7	42053.5	41212.8	38902.8	51351.4	23646.6	35212.4	34323.6	35261.3	35985.8	32924.7	32810.2	C00417	HMDB0000072	643757	585-84-2	32805	5130	ko00020,ko00630,ko00660,ko01100,ko01210
MEDN0206	Citramalic Acid	柠苹酸	Organic acid And Its derivatives	有机酸及其衍生物	Organic acid And Its derivatives	有机酸及其衍生物	147	148.1	[M-H]-	C5H8O5	743822	2.26183e+06	937251	1.48176e+06	1.50445e+06	789639	3.58042e+06	3.58136e+06	2.15001e+06	2.5005e+06	2.86762e+06	3.22717e+06	677922	1.43218e+06	1.40502e+06	1.498e+06	1.28333e+06	989987	3.78128e+06	2.86117e+06	1.90503e+06	2.93326e+06	2.50752e+06	1.97602e+06	1.78222e+06	1.7823e+06	1.80485e+06	1.80001e+06	1.78626e+06	1.80137e+06	C00815	HMDB0000426	1081	597-44-4	15584	5415	-
MEDN0198	Citric Acid	柠檬酸	Organic acid And Its derivatives	有机酸及其衍生物	Organic acid And Its derivatives	有机酸及其衍生物	191	192.027	[M-H]-	C6H8O7	2.04301e+08	3.92126e+08	3.0225e+08	301000359	1.64992e+08	2.47137e+08	680721440	6.44681e+08	5.25168e+08	6.19717e+08	6.96617e+08	7.15017e+08	1.75321e+08	4.30502e+08	3.07343e+08	4.00838e+08	1.40994e+08	2.91829e+08	6.77075e+08	5.90143e+08	9.20905e+08	7.80329e+08	8.04049e+08	521995775	4.10516e+08	4.0579e+08	4.10364e+08	4.05663e+08	4.05585e+08	4.12039e+08	C00158	HMDB0000094	311	77-92-9	30769	124	ko00020,ko00250,ko00630,ko01100,ko01200,ko01210,ko01230,ko01240,ko04742,ko04922,ko05230
MEDN0305	Creatine	肌酸	Organic acid And Its derivatives	有机酸及其衍生物	Organic acid And Its derivatives	有机酸及其衍生物	130.1	131.07	[M-H]-	C4H9N3O2	168750	117612	164345	171684	142079	202312	327879	448009	316900	229347	374199	463249	161334	139748	100802	161929	190248	157288	222590	776503	189698	263628	290930	258321	227119	231767	228515	229981	229887	229291	C00300	HMDB0000064	586	57-00-1	16919	7	ko00260,ko00330,ko01100
MEDP0305	Creatinine	肌酸酐	Organic acid And Its derivatives	有机酸及其衍生物	Organic acid And Its derivatives	有机酸及其衍生物	114.1	113.059	[M+H]+	C4H7N3O	922358	833140	873267	836602	409484	1.35874e+06	1.95197e+06	2.09626e+06	1.64232e+06	2.09456e+06	1.96282e+06	1.71907e+06	277509	488894	1.00718e+06	841722	554376	642446	1.75197e+06	1.90949e+06	1.84359e+06	1.91186e+06	2.17702e+06	1.83253e+06	1.23902e+06	1.23879e+06	1.25211e+06	1.26777e+06	1.22529e+06	1.22719e+06	C00791	HMDB0000562	588	60-27-5	16737	8	ko00330,ko01100
MEDN0593	D-Malic acid	D-(+)-苹果酸	Organic acid And Its derivatives	有机酸及其衍生物	Organic acid And Its derivatives	有机酸及其衍生物	133	134.022	[M-H]-	C4H6O5	1.87781e+06	2.45984e+06	2.25555e+06	2.30591e+06	7.54976e+06	1.13231e+06	1.52778e+06	2.01622e+06	1.58297e+06	1.25573e+06	1.80919e+06	1.7015e+06	629641	1.61731e+06	1.50847e+06	1.65085e+06	2.69713e+06	1.03059e+06	5.47121e+06	5.74085e+06	7.9064e+06	2.30031e+06	7.8656e+06	7.68375e+06	2.19183e+06	2.19695e+06	2.19666e+06	2.20329e+06	2.18487e+06	2.20344e+06	C00497	HMDB0031518	92824	636-61-3	30796	-	ko00650,ko01100
MEDP0518	DL-Stachydrine	盐酸水苏碱	Organic acid And Its derivatives	有机酸及其衍生物	Organic acid And Its derivatives	有机酸及其衍生物	144.1	179.071	[M-Cl]+	C7H14ClNO2	8.09084e+06	8.8451e+06	8.56516e+06	1.42049e+07	1.26578e+07	1.06816e+07	9.86556e+06	1.01626e+07	1.14508e+07	9.59404e+06	1.05908e+07	1.16813e+07	1.28359e+07	2.17714e+07	6.92934e+06	1.16935e+07	2.44042e+07	2.33984e+07	7.0675e+06	7.51559e+06	6.89897e+06	1.24178e+07	9.82095e+06	7.06363e+06	8.73964e+06	9.09219e+06	8.74076e+06	8.72693e+06	8.78094e+06	8.88019e+06	-	-	44150282	4136-37-2	-	-	-
MEDN1533	Dimethylmalonic acid	二甲基丙二酸	Organic acid And Its derivatives	有机酸及其衍生物	Organic acid And Its derivatives	有机酸及其衍生物	131	132.042	[M-H]-	C5H8O4	179685	105152	114569	129935	197706	75122.8	82655.1	97596.5	82703.1	88579.8	42016.2	76030.7	4.6059	4.6059	4.6059	4.6059	4.6059	4.6059	154492	113934	78071.8	113802	176725	160251	127252	127342	129391	128118	128862	127911	-	HMDB0002001	11686	595-46-0	111517	6425	-
MEDP1857	Eicosanoyl-EA	花生四烯酸乙醇酰胺	Organic acid And Its derivatives	有机酸及其衍生物	Organic acid And Its derivatives	有机酸及其衍生物	356.4	355.345	[M+H]+	C22H45NO2	1.37887e+07	1.24919e+07	1.34084e+07	1.13642e+07	1.29402e+07	1.29746e+07	3.23726e+07	2.91264e+07	1.48359e+07	1.4268e+07	3.28384e+07	3.24227e+07	1.34216e+07	1.84411e+07	3.24232e+07	2.07826e+07	1.04092e+07	2.47887e+07	1.9778e+07	2.78871e+07	2.22289e+07	1.56656e+07	2.55628e+07	1.62023e+07	2.50106e+07	2.40322e+07	2.40568e+07	2.45627e+07	2.48356e+07	2.45629e+07	-	-	3787294	94421-69-9	-	-	-
MEDN0413	Ethylmalonate	乙基丙二酸	Organic acid And Its derivatives	有机酸及其衍生物	Organic acid And Its derivatives	有机酸及其衍生物	131	132.042	[M-H]-	C5H8O4	321442	161776	225010	218645	377743	164510	116275	89637.2	189276	122078	144709	114932	202336	192374	201098	173886	214934	176479	182670	170037	138064	148104	149148	231925	189681	189706	192856	187464	193659	188000	-	HMDB0000622	11756	601-75-2	741548	4180	-
MEDN0314	Glutaric Acid	戊二酸	Organic acid And Its derivatives	有机酸及其衍生物	Organic acid And Its derivatives	有机酸及其衍生物	131	132.042	[M-H]-	C5H8O4	179685	105152	114569	129935	197706	75122.8	82655.1	97596.5	82703.1	88579.8	42016.2	76030.7	4.6059	4.6059	4.6059	4.6059	4.6059	4.6059	154492	113934	78071.8	113802	176725	160251	127252	127342	129391	128118	128862	127911	C00489	HMDB0000661	743	110-94-1	17859	3254	ko00071,ko00310,ko01100
MEDN0317	Hippuric Acid	马尿酸	Organic acid And Its derivatives	有机酸及其衍生物	Organic acid And Its derivatives	有机酸及其衍生物	178.1	179.058	[M-H]-	C9H9NO3	1.15374e+08	9.68744e+07	124909918	1.64593e+08	1.01791e+08	1.09459e+08	4.23766e+07	3.85438e+07	4.81617e+07	3.52081e+07	3.0977e+07	3.63099e+07	6.78506e+07	147093910	1.46899e+08	123362455	1.15756e+08	8.54537e+07	1.10131e+08	1.01134e+08	9.18191e+07	6.62076e+07	1.09853e+08	1.01076e+08	9.11904e+07	9.09896e+07	9.11885e+07	9.09196e+07	9.09196e+07	9.12558e+07	C01586	HMDB0000714	464	495-69-2	18089	1301	ko01100
MEDN0555	Hydroxyphenyllactic acid	羟苯基乳酸	Organic acid And Its derivatives	有机酸及其衍生物	Organic acid And Its derivatives	有机酸及其衍生物	181.1	182.058	[M-H]-	C9H10O4	333046	212996	308503	354996	382672	226024	89199.3	98097.2	154257	85155.3	97648.5	86872.3	134094	487554	214551	207346	238584	156052	654520	310075	330397	331965	483442	654940	180855	176463	180995	181042	177063	181102	C03672	HMDB0000755	9378	306-23-0	17385	5723	-
MEDP0874	Hypaphorine	刺桐碱	Organic acid And Its derivatives	有机酸及其衍生物	Organic acid And Its derivatives	有机酸及其衍生物	247.1	246.137	[M+H]+	C14H18N2O2	6.16186e+06	6.72427e+06	7.04178e+06	5.95843e+06	5.24644e+06	7.5207e+06	7.02907e+06	7.54823e+06	6.08214e+06	6.13207e+06	4.8319e+06	7.1132e+06	39.5356	39.5356	39.5356	39.5356	39.5356	39.5356	1.11569e+06	2.56519e+06	3.46439e+06	39.5356	1.29718e+06	1.61364e+06	5.44271e+06	5.30865e+06	5.3986e+06	5.31858e+06	5.33297e+06	5.46149e+06	C09213	HMDB0061115	442106	487-58-1	5832	-	-
MEDN1621	Isocitric acid	异柠檬酸	Organic acid And Its derivatives	有机酸及其衍生物	Organic acid And Its derivatives	有机酸及其衍生物	191	192.027	[M-H]-	C6H8O7	171547	650423	592285	321134	96734.3	524500	140014	121529	126999	87005	81678.3	116687	314852	232909	139414	116878	115142	318883	68023.9	44961.5	68048.5	103567	59602.3	80655.9	631546	632706	631415	628938	633227	633206	C00311	HMDB0000193	1198	320-77-4	30887	3328	ko00020,ko00630,ko01100,ko01200,ko01210,ko01230,ko01240,ko04922,ko05230
MEDP0627	Isonicotinic acid	异烟酸	Organic acid And Its derivatives	有机酸及其衍生物	Organic acid And Its derivatives	有机酸及其衍生物	124	123.032	[M+H]+	C6H5NO2	8.8787e+06	7.60222e+06	8.45687e+06	6.56117e+06	5.13475e+06	6.96773e+06	2.25583e+06	3.16971e+06	2.49366e+06	3.45735e+06	2.75726e+06	2.2839e+06	6.28046e+06	4.59717e+06	6.68021e+06	5.85292e+06	8.13095e+06	4.76659e+06	3.51856e+06	3.44041e+06	4.36975e+06	4.60852e+06	4.07268e+06	3.88924e+06	5.26696e+06	5.30884e+06	5.30872e+06	5.27576e+06	5.27561e+06	5.31268e+06	C07446	HMDB0060665	5922	55-22-1	6032	-	ko00983
MEDN1235	L-2-amino-6-oximelic acid	L-2-氨基-6-氧庚二酸	Organic acid And Its derivatives	有机酸及其衍生物	Organic acid And Its derivatives	有机酸及其衍生物	188.1	189.064	[M-H]-	C7H11NO5	24.0404	24.0404	24.041	24.0407	24.0404	24.0404	70776.5	102472	78117.2	83941.6	47721	108633	31489.6	15749	22761.9	28800.9	26043.3	22633.4	8888.91	21823.7	29214.6	31954.3	25582.1	20463.4	30382.3	31175.9	32133	30241.2	32309.4	29861.6	C03871	-	194695	75650-93-0	-	-	ko00300,ko01100,ko01230
MEDN0328	L-Homoserine	(S)-2-氨基-4-羟基丁酸	Organic acid And Its derivatives	有机酸及其衍生物	Organic acid And Its derivatives	有机酸及其衍生物	118.1	119.058	[M-H]-	C4H9NO3	14205.8	85355.8	106849	54406.3	6.5267	36027.4	12010.4	27793.2	18329.3	25312.4	32233	40073.1	6867.46	2144.03	2861.04	10300.8	2861.04	8309.27	8841.22	30116.7	20603.2	14791.5	18753.9	26413	49624.2	48261.3	49703	47534.3	50069.2	50101	C00263	HMDB0000719	12647	672-15-1	15699	5687	ko00260,ko00270,ko00300,ko00920,ko01100,ko01230
MEDN0325	L-Lactic Acid	L-乳酸	Organic acid And Its derivatives	有机酸及其衍生物	Organic acid And Its derivatives	有机酸及其衍生物	89	90.0317	[M-H]-	C3H6O3	44512.2	11621.8	12993.9	17865.8	45448.6	13992	95652	20980.7	55940.6	29974.3	59359	26117.8	24348.2	8699.79	7827.35	2131.97	23901.4	7077.73	6154.09	2969.07	4327.56	1042.2	9013.44	3817.88	52121.4	49596.5	47897	50344.1	51741.9	50326.5	C00186	HMDB0000190	107689	79-33-4	422	5205	ko00010,ko00051,ko00620,ko00640,ko01100,ko04024,ko04066,ko04922,ko05230
MEDP0325	Maleic Acid	马来酸	Organic acid And Its derivatives	有机酸及其衍生物	Organic acid And Its derivatives	有机酸及其衍生物	117	116.011	[M+H]+	C4H4O4	136523	404738	170884	113812	120518	124240	462370	317989	480236	185881	581149	553593	334776	375001	287002	185256	869587	348711	477126	657173	443080	762369	867396	396230	341417	341365	357634	354231	321216	329271	C01384	HMDB0000176	444266	110-16-7	18300	-	ko00350,ko00650,ko00760,ko01100
MEDN0333	Malonic acid	丙二酸	Organic acid And Its derivatives	有机酸及其衍生物	Organic acid And Its derivatives	有机酸及其衍生物	103	104.011	[M-H]-	C3H4O4	2.03387e+06	1.54139e+06	1.27197e+06	1.75278e+06	2.17955e+06	1.38289e+06	4.34028e+06	2.7154e+06	2.24462e+06	3.11062e+06	2.41436e+06	3.35113e+06	1.13113e+06	1.38366e+06	1.15489e+06	1.34176e+06	2.34631e+06	1.69426e+06	4.34844e+06	2.08945e+06	2.11994e+06	6.23339e+06	2.99785e+06	2.99203e+06	2.31391e+06	2.33385e+06	2.33377e+06	2.3269e+06	2.32688e+06	2.31938e+06	C00383	HMDB0000691	867	141-82-2	30794	3237	ko00061,ko00240,ko00410,ko01100,ko01212
MEDN1981	Mesoaconic acid	中康酸	Organic acid And Its derivatives	有机酸及其衍生物	Organic acid And Its derivatives	有机酸及其衍生物	129	130.1	[M-H]-	C5H6O4	5.34828e+06	8.76247e+06	9.00536e+06	6.21557e+06	5.09835e+06	6.54949e+06	8.44234e+06	6.1602e+06	7.32906e+06	6.47149e+06	8.39622e+06	8.02098e+06	1.83715e+06	3.59051e+06	4.28463e+06	4.7513e+06	1.45616e+06	3.1137e+06	1.08089e+07	6.24022e+06	1.03804e+07	1.45878e+07	1.09525e+07	9.79475e+06	6.22064e+06	6.21952e+06	6.27369e+06	6.22701e+06	6.28946e+06	6.22727e+06	C01732	HMDB0000749	638129	498-24-8	16600	4130	ko00630,ko00660,ko01100,ko01200
MEDN0335	Methylmalonic Acid	甲基丙二酸	Organic acid And Its derivatives	有机酸及其衍生物	Organic acid And Its derivatives	有机酸及其衍生物	117	118.027	[M-H]-	C4H6O4	4.49459e+06	2.71693e+06	4.08732e+06	4.37383e+06	1.12733e+07	2.38538e+06	4.33951e+06	5.76339e+06	5.69639e+06	3.80453e+06	4.97319e+06	5.35244e+06	6.22821e+06	7.91379e+06	8.57459e+06	5.70583e+06	5.18462e+06	7.46614e+06	2.02666e+06	1.07896e+06	1.23853e+06	842283	1.77405e+06	1.92548e+06	6.69533e+06	6.69503e+06	6.63598e+06	6.65512e+06	6.65526e+06	6.71015e+06	C02170	HMDB0000202	487	516-05-2	30860	3712	ko00240,ko00280,ko00640,ko01100
MEDN1335	N-Cinnamylglycine	N-肉桂基甘氨酸	Organic acid And Its derivatives	有机酸及其衍生物	Organic acid And Its derivatives	有机酸及其衍生物	204	205.074	[M-H]-	C11H11NO3	2.38803e+06	6.31505e+06	3.73401e+06	5.9253e+06	1.67008e+06	2.25454e+06	120315	330312	170214	187456	105364	135652	4.43105e+06	1.28081e+07	1.26632e+07	8.13833e+06	7.36109e+06	8.80044e+06	546988	562864	519529	935668	832988	624421	2.73038e+06	2.7334e+06	2.74314e+06	2.7409e+06	2.73032e+06	2.74085e+06	-	HMDB0011621	709625	16534-24-0	68616	-	-
MEDN1566	Octadecanedioic acid	十八烷二酸	Organic acid And Its derivatives	有机酸及其衍生物	Organic acid And Its derivatives	有机酸及其衍生物	313.2	314.246	[M-H]-	C18H34O4	155924	51234.9	57611.5	45526.8	45446.8	66049.3	79159.1	108199	55513.1	113144	61985.4	74139.2	56506.9	78224.7	51104.8	63390.3	67635.4	63513.4	79050.2	76454	82635.9	51303.8	60733.5	83584.5	77350.1	77936	77623.1	76964.8	77029.8	78435.4	-	HMDB0000782	70095	871-70-5	133086	5748	-
MEDN0470	Oxoadipic Acid	2-氧代己二酸	Organic acid And Its derivatives	有机酸及其衍生物	Organic acid And Its derivatives	有机酸及其衍生物	159	160.037	[M-H]-	C6H8O5	1.99424e+06	1.56531e+06	636071	1.12061e+06	1.9497e+06	475516	72908.5	132166	73851.6	136735	113225	26302.8	534731	501356	792965	580043	1.09888e+06	310853	947271	703458	796672	599943	290685	1.21245e+06	650264	622667	650332	646438	643112	643117	C00322	HMDB0000225	71	3184-35-8	15753	5234	ko00300,ko00310,ko00380,ko01100,ko01210,ko01230,ko01240
MEDN0338	Phenyllactate(Pla)	DL-3-苯基乳酸	Organic acid And Its derivatives	有机酸及其衍生物	Organic acid And Its derivatives	有机酸及其衍生物	165.1	166.063	[M-H]-	C9H10O3	18059.5	5378.85	4621.69	6181.92	14020.1	8235.89	33921.8	18526.2	88750.5	10707.7	66254.9	13047.1	2117.95	23328.5	53126.2	28976.7	25509	22795.1	5405.25	1476.4	2205.58	3719.43	3590.26	3154.09	28429.5	28429.4	28382.5	28529.7	28167.3	28532.3	C01479	HMDB0000779	3848	828-01-3	25998	5745	-
MEDN1722	Piperic acid	胡椒酸	Organic acid And Its derivatives	有机酸及其衍生物	Organic acid And Its derivatives	有机酸及其衍生物	165	166.027	[M-H]-	C8H6O4	230288	328433	153919	169883	379587	115849	145760	299891	305018	208184	278283	300903	183075	186127	158092	206930	147734	192182	239670	209791	199903	222482	260247	255875	481209	474628	474625	475527	480429	475606	C04599	HMDB0032613	7196	94-53-1	-	-	ko05012,ko05022
MEDN0622	Porphobilinogen	紫质胆素原	Organic acid And Its derivatives	有机酸及其衍生物	Organic acid And Its derivatives	有机酸及其衍生物	225.1	226.095	[M-H]-	C10H14N2O4	832543	847650	332487	371759	771437	337256	593693	658416	1.02851e+06	519259	629644	634486	475959	540726	443947	468266	408280	390216	503947	567894	386943	662438	796856	876105	1.2785e+06	1.28589e+06	1.42632e+06	1.30216e+06	1.32658e+06	1.33587e+06	C00931	HMDB0000245	1021	487-90-1	-	-	ko00860,ko01100,ko01240
MEDN2096	Pyrazine-2-carboxylic acid	吡嗪-2-羧酸	Organic acid And Its derivatives	有机酸及其衍生物	Organic acid And Its derivatives	有机酸及其衍生物	123	124.028	[M-H]-	C5H4N2O2	453607	581734	579819	553824	580454	485489	713346	738578	726019	616985	656164	707040	604972	577283	594540	569307	530317	544827	541927	605962	584450	604676	589469	607917	583249	583763	601022	594305	585525	588485	C19915	HMDB0059734	1047	98-97-5	71311	-	-
MEDN0321	Quinic acid	奎尼酸	Organic acid And Its derivatives	有机酸及其衍生物	Organic acid And Its derivatives	有机酸及其衍生物	191.1	192.063	[M-H]-	C7H12O6	4.20241e+07	8.02823e+07	4.66962e+07	5.87558e+07	3.39731e+07	4.32587e+07	1.85511e+08	1.60463e+08	1.37823e+08	1.39533e+08	1.71651e+08	1.7434e+08	3.97725e+07	8.87516e+07	9.16191e+07	8.77735e+07	5.65373e+07	6.475e+07	1.60275e+08	150226271	147029016	1.43246e+08	1.40591e+08	9.15512e+07	9.67415e+07	9.62848e+07	9.62842e+07	9.58632e+07	9.51578e+07	9.74243e+07	C00296	HMDB0003072	6508	77-95-2	17521	3329	ko00400,ko01100
MEDP1488	SDMA	(S)-2-氨基-5-((双(甲基氨基)亚甲基)氨基)戊酸	Organic acid And Its derivatives	有机酸及其衍生物	Organic acid And Its derivatives	有机酸及其衍生物	203	202.143	[M+H]+	C8H18N4O2	220787	790739	910335	582104	124109	543743	196812	244011	247923	114793	70624.5	249615	551696	711768	1.04622e+06	466707	229283	559397	112313	78443.6	134621	320134	143284	107055	319602	316255	338675	324025	338656	324040	-	HMDB0003334	169148	30344-00-4	25682	6891	-
MEDP2283	ST-638	ST-638	Organic acid And Its derivatives	有机酸及其衍生物	Organic acid And Its derivatives	有机酸及其衍生物	355.1	354.104	[M+H]+	C19H18N2O3S	106885	67589.1	17689.1	45450.8	5755.81	10513.6	53657.8	48821	95150.7	46837.6	43517.7	48004.5	58911.5	116228	40639.2	88567.3	6313.46	19370.3	21713.5	6758.29	7348.47	3624.56	12240.7	11668.6	102051	104615	104499	104524	104514	93391.6	-	-	5276	107761-24-0	-	-	-
MEDN0342	Sebacate	癸二酸	Organic acid And Its derivatives	有机酸及其衍生物	Organic acid And Its derivatives	有机酸及其衍生物	201.1	202.121	[M-H]-	C10H18O4	361665	309579	320045	348475	360753	326634	349909	342635	318222	336334	333558	337038	276508	348143	321498	300123	342408	337255	340303	347105	326376	305225	346788	318386	329662	333189	329781	330654	330638	332343	C08277	HMDB0000792	5192	111-20-6	41865	4240	-
MEDN0343	Shikimic Acid	莽草酸	Organic acid And Its derivatives	有机酸及其衍生物	Organic acid And Its derivatives	有机酸及其衍生物	173	174.053	[M-H]-	C7H10O5	1.44204e+07	7.50282e+06	1.52612e+07	1.47248e+07	1.13383e+07	8.6005e+06	2.62151e+06	2.14162e+06	3.83847e+06	1.98297e+06	1.98852e+06	2.05581e+06	697285	5.16788e+06	4.73672e+06	5.6275e+06	3.78161e+06	3.85197e+06	2.33278e+07	2.08465e+07	1.66227e+07	1.00543e+07	2.08453e+07	1.30015e+07	8.01653e+06	8.04434e+06	8.02736e+06	8.02705e+06	8.0431e+06	8.02247e+06	C00493	HMDB0003070	8742	138-59-0	16119	338	ko00400,ko01100,ko01230,ko01240
MEDP1802	Stachydrine	水苏碱	Organic acid And Its derivatives	有机酸及其衍生物	Organic acid And Its derivatives	有机酸及其衍生物	144.1	143.095	[M+H]+	C7H13NO2	2.26491e+06	2.99294e+06	2.57662e+06	2.54577e+06	2.78443e+06	2.14105e+06	2.57259e+06	2.62571e+06	3.95901e+06	2.86293e+06	2.50006e+06	2.45411e+06	2.76996e+06	2.11045e+06	1.62556e+06	2.37118e+06	2.26697e+06	3.7881e+06	2.61635e+06	3.19789e+06	1.45419e+06	3.4824e+06	2.14421e+06	3378144	2.53334e+06	2.54964e+06	2.26577e+06	2.49772e+06	2.49965e+06	2.31898e+06	C10172	HMDB0004827	115244	471-87-4	35280	7089	-
MEDN0344	Subericacid	辛二酸	Organic acid And Its derivatives	有机酸及其衍生物	Organic acid And Its derivatives	有机酸及其衍生物	173.1	174.089	[M-H]-	C8H14O4	2.35957e+06	2.08344e+06	1.79807e+06	2.08864e+06	2.36384e+06	2.18087e+06	1.72846e+06	1.92783e+06	1.90578e+06	1.8459e+06	1.85989e+06	1.85994e+06	2.02903e+06	2.17145e+06	2.05982e+06	1.91691e+06	2.17556e+06	2.0775e+06	2.10867e+06	2.12293e+06	2.0801e+06	2.20239e+06	1.96869e+06	2.0139e+06	1.89031e+06	1.89054e+06	1.90375e+06	1.90085e+06	1.90083e+06	1.89354e+06	C08278	HMDB0000893	10457	505-48-6	9300	4243	-
MEDN0201	Succinic Acid	琥珀酸	Organic acid And Its derivatives	有机酸及其衍生物	Organic acid And Its derivatives	有机酸及其衍生物	117	118.027	[M-H]-	C4H6O4	4.49459e+06	2.71693e+06	4.08732e+06	4.37383e+06	1.12733e+07	2.38538e+06	4.33951e+06	5.76339e+06	5.69639e+06	3.80453e+06	4.97319e+06	5.35244e+06	6.22821e+06	7.91379e+06	8.57459e+06	5.70583e+06	5.18462e+06	7.46614e+06	2.02666e+06	1.07896e+06	1.23853e+06	842283	1.77405e+06	1.92548e+06	6.69533e+06	6.69503e+06	6.63598e+06	6.65512e+06	6.65526e+06	6.71015e+06	C00042	HMDB0000254	1110	110-15-6	-	-	ko00020,ko00190,ko00250,ko00310,ko00350,ko00360,ko00620,ko00630,ko00640,ko00650,ko00760,ko00920,ko01100,ko01200,ko04024,ko04727,ko04922,ko05230
MEDN0651	Succinic anhydride	琥珀酸酐	Organic acid And Its derivatives	有机酸及其衍生物	Organic acid And Its derivatives	有机酸及其衍生物	99	100.016	[M-H]-	C4H4O3	1.24559e+07	1.13737e+07	1.27224e+07	1.57881e+07	2.10308e+07	9.90761e+06	1.33617e+07	1.71971e+07	1.97064e+07	1.79453e+07	1.88631e+07	1.25951e+07	1.36597e+07	1.53394e+07	1.33617e+07	8.19535e+06	1.57522e+07	1.3684e+07	2.98199e+07	2.86074e+07	3.22305e+07	2.44834e+07	2.30365e+07	3.2331e+07	1.76171e+07	1.74132e+07	1.7508e+07	1.7481e+07	1.74806e+07	1.76133e+07	C19524	HMDB0032523	7922	108-30-5	36595	-	-
MEDN1719	Tetradecyl phosphonic acid	十四烷基膦酸	Organic acid And Its derivatives	有机酸及其衍生物	Organic acid And Its derivatives	有机酸及其衍生物	277.2	278.201	[M-H]-	C14H31O3P	23051.3	34334.1	38234	30327.6	30365.9	30446.4	26993.5	29931.8	33393.7	33912.1	32001.3	25378.6	8058.93	7753.02	8382.93	8739.7	6915.57	7796.26	11362.6	12555.3	14687.2	15680.8	14661.3	15265.9	27728.6	27725.3	27388.2	27368.7	27746.4	27743.9	-	-	78401	4671-75-4	-	-	-
MEDN1590	Tricarballylic acid	三羰基丙酸	Organic acid And Its derivatives	有机酸及其衍生物	Organic acid And Its derivatives	有机酸及其衍生物	175	176.032	[M-H]-	C6H8O6	1.34549e+06	647870	688004	459686	290586	332589	17057.3	29230.8	45301.9	20981.9	14969.9	28422.9	197662	1.21639e+06	277417	559066	317431	197561	88996.8	72980.1	60665.5	61798.8	44376.1	121445	367699	365181	365181	365037	365031	366810	C19806	HMDB0031193	14925	99-14-9	45969	-	-
MEDN1717	Tropine	托品酸	Organic acid And Its derivatives	有机酸及其衍生物	Organic acid And Its derivatives	有机酸及其衍生物	165.1	166.063	[M-H]-	C9H10O3	18059.5	5378.85	4621.69	6181.92	14020.1	8235.89	33921.8	18526.2	88750.5	10707.7	66254.9	13047.1	2117.95	23328.5	53126.2	28976.7	25509	22795.1	5405.25	1476.4	2205.58	3719.43	3590.26	3154.09	28429.5	28429.4	28382.5	28529.7	28167.3	28532.3	C01456	HMDB0062590	10726	529-64-6	30765	-	-
MEDN1006	Uric acid	尿酸	Organic acid And Its derivatives	有机酸及其衍生物	Organic acid And Its derivatives	有机酸及其衍生物	167	168.028	[M-H]-	C5H4N4O3	599193	670388	438591	1.83136e+06	900251	986661	382865	441938	372886	231022	448723	339090	1.4033e+06	519187	704198	509036	988415	439510	2.49746e+06	2.46504e+06	2.39261e+06	1.08944e+06	2.74473e+06	3.11853e+06	939365	936697	939339	945951	928718	943855	C00366	HMDB0000289	1175	69-93-2	17775	88	ko00230,ko01100,ko04976
MEDN1965	α-Hydroxyglutaric Acid (sodium salt)	α-羟基戊二酸（钠盐）	Organic acid And Its derivatives	有机酸及其衍生物	Organic acid And Its derivatives	有机酸及其衍生物	147	148.11	[M-H]-	C5H8O5	650134	631948	979472	1.03922e+06	3.19865e+06	843695	1.40645e+06	1.68466e+06	1.45587e+06	1.56351e+06	1.38989e+06	1.41044e+06	453594	755798	545378	922270	753832	355874	3.16475e+06	1.33604e+06	1.83245e+06	3.23177e+06	1.78358e+06	2.76595e+06	1.03201e+06	1.03118e+06	1.0539e+06	1.02408e+06	1.05082e+06	1.05058e+06	-	-	218623	40951-21-1	-	-	-
MEDN0202	α-Ketoglutaric Acid (α-KG)	α-酮戊二酸	Organic acid And Its derivatives	有机酸及其衍生物	Organic acid And Its derivatives	有机酸及其衍生物	145	146.022	[M-H]-	C5H6O5	2.21354e+06	1.96705e+06	1.75693e+06	2.49291e+06	9.16863e+06	1.19072e+06	2.13095e+06	1.22633e+06	1.49848e+06	912798	3.19636e+06	1.30067e+06	1.4383e+06	2.38376e+06	3.08028e+06	2.53606e+06	2.42279e+06	1.53515e+06	3.97536e+06	2.66706e+06	2.42445e+06	1.23187e+06	2.42859e+06	4.04617e+06	2.24877e+06	2.24889e+06	2.27913e+06	2.28864e+06	2.25711e+06	2.25733e+06	C00026	HMDB0000208	51	328-50-7	30915	5218	ko00020,ko00040,ko00053,ko00220,ko00250,ko00300,ko00310,ko00340,ko00430,ko00470,ko00630,ko00650,ko00660,ko01100,ko01200,ko01210,ko01230,ko01240,ko04066,ko04727,ko04922,ko04964,ko04976,ko05230
MEDP2092	2,4-Quinolinediol	2,4-喹啉二醇	Heterocyclic compounds	杂环化合物	Heterocyclic compounds	杂环化合物	162.1	161.048	[M+H]+	C9H7NO2	809315	920189	1.1841e+06	1.14984e+06	703935	785708	328863	511286	272253	231913	186608	236384	243100	620558	672966	780667	911366	560653	600193	675396	726757	538619	892012	888533	593210	585568	585438	586439	596603	586360	C16716	-	54680871	86-95-3	-	-	-
MEDP1814	2,5-Dimethyl-2,3-dihydrofuran-3-one	1,2,5-二甲基-3,2-二氢呋喃	Heterocyclic compounds	杂环化合物	Heterocyclic compounds	杂环化合物	113.1	112.052	[M+H]+	C6H8O2	495111	492629	485116	562808	553566	506641	621992	655773	648183	693518	707156	709107	398664	301644	321075	390977	450541	380728	471940	384892	388344	447212	576455	494883	402542	434899	435004	408564	416838	432157	D90227	HMDB0032233	85730	14400-67-0	-	-	-
MEDN2012	2-pyrimidine acetic acid	2-嘧啶乙酸	Heterocyclic compounds	杂环化合物	Heterocyclic compounds	杂环化合物	137	138.043	[M-H]-	C6H6N2O2	875807	802132	996111	1.21758e+06	3.09564e+06	822940	7.86036	7.86036	7.86036	7.86036	7.86036	7.86036	257491	610159	458162	726413	366703	450266	455745	507806	304742	181352	1.18374e+06	296490	583750	586730	586729	584286	584527	587232	-	-	12367098	66621-73-6	-	-	-
MEDP2364	4-Amino-5-hydroxymethyl-2-methylpyrimidine	4-氨基-5-羟基甲基-2-甲基嘧啶	Heterocyclic compounds	杂环化合物	Heterocyclic compounds	杂环化合物	140.1	139.075	[M+H]+	C6H9N3O	800317	190992	256280	54867.9	304125	127669	130017	108579	261388	137263	353597	438335	337939	447176	65350.2	203082	847808	437187	76678.1	176961	72519.2	167370	68762.8	136588	387451	381728	344281	382130	305447	382584	C01279	-	777	73-67-6	-	-	ko00730,ko01100,ko01240,ko02010
MEDN1022	5,6-Dimethylbenzimidazole	5,6-二甲基苯并咪唑	Heterocyclic compounds	杂环化合物	Heterocyclic compounds	杂环化合物	145.1	146.084	[M-H]-	C9H10N2	16939.7	49286.6	75388.2	33028.2	10969.8	35831.6	30753.8	21685	34906.3	32304.9	18280.6	47848	16469.5	23704.9	23710.2	17369.6	16288.5	36060.5	12117.3	14745.8	16158.3	11598.6	14294	14695.9	72092.3	73523.3	73725.8	73490.5	72098	73453.9	C03114	HMDB0003701	675	582-60-5	15890	-	ko00740,ko00860,ko01100,ko01240
MEDN1208	6-hydroxy-3-succinylpyridine	6-羟基-3-琥珀酰吡啶	Heterocyclic compounds	杂环化合物	Heterocyclic compounds	杂环化合物	194	195.053	[M-H]-	C9H9NO4	224836	240680	184950	199807	98046.7	128533	136990	168081	182535	118449	153518	176675	120965	471896	366998	298304	286422	188408	54878.6	50494.2	52940.7	15026.2	62041.6	79928.7	212114	212133	215758	214955	212597	214935	C19631	-	579061	15873-27-5	-	-	ko00760,ko01100
MEDP1748	Cyromazine	环丙氨嗪	Heterocyclic compounds	杂环化合物	Heterocyclic compounds	杂环化合物	167.1	166.097	[M+H]+	C6H10N6	520233	368643	475905	620282	457679	821219	174237	214302	271983	159596	155518	167296	301556	330563	385275	269180	207722	388126	840766	717163	885451	941318	1.2083e+06	730756	383063	383044	376599	387473	376523	377155	C14147	HMDB0029862	47866	66215-27-8	30260	-	-
MEDP2375	Ectoine	(S)-2-甲基-3,4,5,6-四氢嘧啶-4-羧酸	Heterocyclic compounds	杂环化合物	Heterocyclic compounds	杂环化合物	143.1	142.074	[M+H]+	C6H10N2O2	90645.5	204065	123529	96587.2	289451	122263	286989	335745	186289	236654	262677	227118	105160	122752	105633	61371.5	118475	111344	391438	64014	11.5485	116000	59964	67086.2	108617	114209	118114	111266	116266	112962	C06231	-	126041	96702-03-3	-	-	ko00260,ko01100
MEDN1656	Hydroxypiperazic acid	羟基哌嗪酸	Heterocyclic compounds	杂环化合物	Heterocyclic compounds	杂环化合物	145.1	146.106	[M-H]-	C5H10N2O3	133285	1.22195e+06	805193	455612	20497.4	416807	183269	158935	181990	180635	183591	319245	1.92923e+06	530384	812903	746003	433325	1.12971e+06	121804	330756	199620	345696	343725	165780	390173	384098	390437	391621	391865	363603	C00739	-	129859924	-	-	-	ko00310,ko00470,ko01100
MEDP1060	Hydroxyquinoline	羟喹啉	Heterocyclic compounds	杂环化合物	Heterocyclic compounds	杂环化合物	146.1	145.053	[M+H]+	C9H7NO	455853	1.60174e+06	2.29396e+06	915175	213011	1.06434e+06	1.1036e+06	849055	1.10107e+06	915610	488766	1.93398e+06	389258	1.69488e+06	661575	626591	311772	2.23677e+06	125127	126019	189886	112794	150815	155873	2.71819e+06	2.71483e+06	2.76271e+06	2.75638e+06	2.72305e+06	2.73657e+06	C19434	-	1923	148-24-3	-	-	-
MEDP0890	Lumichrome	光色素	Heterocyclic compounds	杂环化合物	Heterocyclic compounds	杂环化合物	243.2	242.08	[M+H]+	C12H10N4O2	7.16964e+06	4.83125e+06	9.19179e+06	3.81209e+06	5.38226e+06	4.42701e+06	3.35154e+06	3.15961e+06	3.36435e+06	2.78792e+06	3.31988e+06	3.26893e+06	3.8857e+06	5.73308e+06	3.93118e+06	5.91807e+06	9.05544e+06	4.86604e+06	7.83077e+06	6.23367e+06	4.76831e+06	7.55329e+06	9.47198e+06	5.91334e+06	5.07394e+06	5.07787e+06	5.07788e+06	5.07636e+06	5.06564e+06	5.10641e+06	C01727	-	5326566	1086-80-2	-	-	ko00740
MEDP2412	N-(2-hydroxyethyl)-3-pyridinecarboxamide	N-(2-羟乙基)-3-吡啶甲酰胺	Heterocyclic compounds	杂环化合物	Heterocyclic compounds	杂环化合物	167.1	166.074	[M+H]+	C8H10N2O2	267165	279555	321668	283446	297913	273469	324683	304420	334255	321556	277954	296579	230942	266506	229530	242626	212316	284411	204571	227709	244523	230092	236156	176948	573774	573713	568500	566480	572772	572792	-	-	72663	6265-73-2	-	-	-
MEDP1211	N-acetylpyrrolidine	N-乙酰基吡咯烷	Heterocyclic compounds	杂环化合物	Heterocyclic compounds	杂环化合物	114.1	113.084	[M+H]+	C6H11NO	760105	568431	663172	1.63166e+06	870130	1.28003e+06	2.55343e+06	2.89213e+06	1.87783e+06	2.63311e+06	2.16725e+06	2.01279e+06	214518	624879	1.4931e+06	383575	514002	159522	1.47761e+06	1.4747e+06	1.54932e+06	1.86671e+06	1.91995e+06	1.39843e+06	1.29261e+06	1.28258e+06	1.3098e+06	1.21017e+06	1.31102e+06	1.31242e+06	-	-	77650	4030-18-6	-	-	-
MEDN1710	Palatinose	帕拉金糖	Heterocyclic compounds	杂环化合物	Heterocyclic compounds	杂环化合物	341.1	342.116	[M-H]-	C12H22O11	311016	445086	216516	283295	186343	422092	283346	311399	232239	396902	316687	317695	280116	272190	256189	289582	320409	316774	570476	535531	682092	433435	543908	530758	286988	300576	300866	295549	305293	295562	C01742	-	439559	58166-27-1	-	-	-
MEDN1966	Pyrimidine-4-carboxylic acid sodium salt	嘧啶-4-羧酸钠盐	Heterocyclic compounds	杂环化合物	Heterocyclic compounds	杂环化合物	123	124.1	[M-H]-	C5H4N2O2	550135	447210	746583	552326	580271	706342	626307	624587	635212	537061	621906	551164	508936	522883	530723	482990	467660	466551	464687	477796	485210	582259	539316	516848	556642	553824	558247	559002	559999	544031	-	-	24820426	819850-18-5	-	-	-
MEDP0792	Pyrrolidine	四氢吡咯	Heterocyclic compounds	杂环化合物	Heterocyclic compounds	杂环化合物	72.3	71.0735	[M+H]+	C4H9N	190022	533267	551732	137512	105809	147577	525010	391790	247911	376206	294838	324367	340100	79700.9	135577	97458.3	434094	241643	69390.8	40110.4	74299.1	87931.2	52511.4	63393.4	504546	524468	527242	546788	506144	506781	-	HMDB0031641	31268	123-75-1	33135	-	-
MEDP0882	Thiamine-Monophosphate	硫胺素单磷酸盐	Heterocyclic compounds	杂环化合物	Heterocyclic compounds	杂环化合物	345	345.079	[M]+	C12H18N4O4PS	351412	714354	343142	590766	569140	965015	781827	823092	743807	517684	522409	722426	226031	1.02049e+06	831907	597770	455440	573651	79764.2	179230	623621	1.62203e+06	189459	52425.9	488803	460615	488968	474232	474039	489212	C01081	HMDB0002666	3382778	273724-21-3	37574	3488	ko00730,ko01100,ko01240
MEDN1895	Ethyl hydrogen malonate	丙二酸单乙酯	Aldehyde,Ketones,Esters	醛、酮、酯类	Esters	酯类	131	132.11	[M-H]-	C5H8O4	179685	105152	114569	129935	197706	75122.8	82655.1	97596.5	82703.1	88579.8	42016.2	76030.7	4.6059	4.6059	4.6059	4.6059	4.6059	4.6059	154492	113934	78071.8	113802	176725	160251	127252	127342	129391	128118	128862	127911	-	HMDB0000576	70615	1071-46-1	-	5558	-

## Sheet: ST2
Table S2. Correlation coefficient between samples
	SMM1	SMM2	SMM3	SMM4	SMM5	SMM6	BMM1	BMM2	BMM3	BMM4	BMM5	BMM6	GMM1	GMM2	GMM3	GMM4	GMM5	GMM6	CMM1	CMM2	CMM3	CMM4	CMM5	CMM6	QC01	QC02	QC03	QC04	QC05	QC06
SMM1	1	0.960622	0.973699	0.967491	0.953277	0.971403	0.856737	0.863583	0.87827	0.84924	0.797154	0.826604	0.912218	0.943867	0.948152	0.90214	0.914609	0.93144	0.812131	0.753672	0.778954	0.845901	0.832445	0.809872	0.943624	0.943325	0.944231	0.944445	0.943676	0.943857
SMM2	0.960622	1	0.979534	0.974491	0.91763	0.977189	0.907114	0.915457	0.917406	0.890905	0.85895	0.88348	0.900819	0.960576	0.948955	0.935908	0.888361	0.925159	0.871054	0.82971	0.864564	0.887297	0.897091	0.847229	0.958694	0.955363	0.958509	0.95841	0.956769	0.957178
SMM3	0.973699	0.979534	1	0.964924	0.951746	0.980123	0.84927	0.866172	0.87236	0.831824	0.787563	0.818156	0.927081	0.942725	0.939142	0.937927	0.929861	0.933955	0.81265	0.766823	0.798199	0.874583	0.845786	0.798408	0.933555	0.930903	0.933288	0.933726	0.932207	0.932149
SMM4	0.967491	0.974491	0.964924	1	0.922521	0.976272	0.897866	0.897799	0.92064	0.893922	0.864013	0.882143	0.891134	0.954338	0.94273	0.913251	0.869684	0.899055	0.875092	0.826929	0.846694	0.865908	0.884285	0.86851	0.95992	0.96017	0.960107	0.960742	0.960338	0.959818
SMM5	0.953277	0.91763	0.951746	0.922521	1	0.955121	0.826861	0.860091	0.867301	0.822264	0.753304	0.787784	0.973348	0.858772	0.862994	0.891133	0.969635	0.903836	0.782902	0.708066	0.739647	0.91561	0.826538	0.770905	0.913566	0.91612	0.914496	0.91525	0.915413	0.914691
SMM6	0.971403	0.977189	0.980123	0.976272	0.955121	1	0.862228	0.880727	0.89184	0.854706	0.804704	0.833837	0.948777	0.955957	0.957999	0.942444	0.934544	0.955998	0.813583	0.753712	0.785294	0.892441	0.852423	0.80041	0.939725	0.93984	0.939907	0.940986	0.940132	0.939489
BMM1	0.856737	0.907114	0.84927	0.897866	0.826861	0.862228	1	0.989475	0.990184	0.992237	0.978767	0.994592	0.810949	0.854977	0.81191	0.846117	0.765496	0.795736	0.961041	0.920826	0.950543	0.903033	0.967017	0.937928	0.952347	0.952737	0.952895	0.951907	0.952581	0.953463
BMM2	0.863583	0.915457	0.866172	0.897799	0.860091	0.880727	0.989475	1	0.988269	0.985596	0.954165	0.976942	0.853079	0.852133	0.817556	0.86597	0.815605	0.820496	0.953588	0.911879	0.937738	0.938989	0.977899	0.933063	0.951632	0.951596	0.952191	0.951174	0.951644	0.952547
BMM3	0.87827	0.917406	0.87236	0.92064	0.867301	0.89184	0.990184	0.988269	1	0.990735	0.971441	0.984669	0.851119	0.861014	0.824759	0.857215	0.799955	0.811687	0.959088	0.91828	0.937859	0.924548	0.968777	0.94729	0.964648	0.966962	0.965323	0.96521	0.966031	0.966138
BMM4	0.84924	0.890905	0.831824	0.893922	0.822264	0.854706	0.992237	0.985596	0.990735	1	0.982676	0.992134	0.802585	0.839763	0.798705	0.823963	0.750073	0.775072	0.963131	0.918305	0.946216	0.89908	0.963763	0.953012	0.950167	0.952337	0.950852	0.950256	0.951378	0.951983
BMM5	0.797154	0.85895	0.787563	0.864013	0.753304	0.804704	0.978767	0.954165	0.971441	0.982676	1	0.992236	0.725725	0.801897	0.75205	0.768527	0.658794	0.698117	0.966239	0.933653	0.961098	0.851315	0.941945	0.951314	0.918119	0.92064	0.9185	0.918186	0.91932	0.919695
BMM6	0.826604	0.88348	0.818156	0.882143	0.787784	0.833837	0.994592	0.976942	0.984669	0.992134	0.992236	1	0.769343	0.833079	0.784909	0.812078	0.713351	0.752356	0.965379	0.929839	0.957227	0.878734	0.959862	0.946919	0.935606	0.937038	0.936178	0.93544	0.936398	0.937046
GMM1	0.912218	0.900819	0.927081	0.891134	0.973348	0.948777	0.810949	0.853079	0.851119	0.802585	0.725725	0.769343	1	0.853107	0.852687	0.913134	0.979221	0.932879	0.733768	0.657915	0.698809	0.92022	0.809314	0.718714	0.874041	0.878101	0.87486	0.876559	0.876828	0.875366
GMM2	0.943867	0.960576	0.942725	0.954338	0.858772	0.955957	0.854977	0.852133	0.861014	0.839763	0.801897	0.833079	0.853107	1	0.98647	0.945132	0.850127	0.947599	0.808917	0.763965	0.79571	0.805527	0.839977	0.794191	0.908392	0.904778	0.908672	0.908362	0.906604	0.90758
GMM3	0.948152	0.948955	0.939142	0.94273	0.862994	0.957999	0.81191	0.817556	0.824759	0.798705	0.75205	0.784909	0.852687	0.98647	1	0.916878	0.858799	0.953606	0.765145	0.718108	0.741254	0.784062	0.795765	0.754153	0.885862	0.881376	0.886003	0.88582	0.883635	0.884664
GMM4	0.90214	0.935908	0.937927	0.913251	0.891133	0.942444	0.846117	0.86597	0.857215	0.823963	0.768527	0.812078	0.913134	0.945132	0.916878	1	0.905018	0.943305	0.784776	0.730257	0.784187	0.870555	0.852768	0.760507	0.888134	0.885683	0.888561	0.88829	0.887151	0.887739
GMM5	0.914609	0.888361	0.929861	0.869684	0.969635	0.934544	0.765496	0.815605	0.799955	0.750073	0.658794	0.713351	0.979221	0.850127	0.858799	0.905018	1	0.940069	0.695918	0.619216	0.653659	0.891689	0.774176	0.672138	0.847501	0.847776	0.848298	0.848742	0.848201	0.847901
GMM6	0.93144	0.925159	0.933955	0.899055	0.903836	0.955998	0.795736	0.820496	0.811687	0.775072	0.698117	0.752356	0.932879	0.947599	0.953606	0.943305	0.940069	1	0.700094	0.634283	0.678636	0.832573	0.77684	0.681903	0.860911	0.858937	0.86153	0.861798	0.860344	0.860684
CMM1	0.812131	0.871054	0.81265	0.875092	0.782902	0.813583	0.961041	0.953588	0.959088	0.963131	0.966239	0.965379	0.733768	0.808917	0.765145	0.784776	0.695918	0.700094	1	0.975205	0.983658	0.879766	0.978741	0.981629	0.914753	0.914049	0.915295	0.913654	0.913974	0.915638
CMM2	0.753672	0.82971	0.766823	0.826929	0.708066	0.753712	0.920826	0.911879	0.91828	0.918305	0.933653	0.929839	0.657915	0.763965	0.718108	0.730257	0.619216	0.634283	0.975205	1	0.96397	0.808277	0.951374	0.971074	0.873747	0.871083	0.873568	0.872056	0.871688	0.873055
CMM3	0.778954	0.864564	0.798199	0.846694	0.739647	0.785294	0.950543	0.937738	0.937859	0.946216	0.961098	0.957227	0.698809	0.79571	0.741254	0.784187	0.653659	0.678636	0.983658	0.96397	1	0.858874	0.966578	0.959631	0.891278	0.889116	0.891682	0.889619	0.889451	0.891541
CMM4	0.845901	0.887297	0.874583	0.865908	0.91561	0.892441	0.903033	0.938989	0.924548	0.89908	0.851315	0.878734	0.92022	0.805527	0.784062	0.870555	0.891689	0.832573	0.879766	0.808277	0.858874	1	0.92905	0.842941	0.894546	0.896697	0.895549	0.895222	0.895786	0.896528
CMM5	0.832445	0.897091	0.845786	0.884285	0.826538	0.852423	0.967017	0.977899	0.968777	0.963763	0.941945	0.959862	0.809314	0.839977	0.795765	0.852768	0.774176	0.77684	0.978741	0.951374	0.966578	0.92905	1	0.961226	0.92318	0.922202	0.923986	0.922354	0.922436	0.924015
CMM6	0.809872	0.847229	0.798408	0.86851	0.770905	0.80041	0.937928	0.933063	0.94729	0.953012	0.951314	0.946919	0.718714	0.794191	0.754153	0.760507	0.672138	0.681903	0.981629	0.971074	0.959631	0.842941	0.961226	1	0.907121	0.908299	0.90761	0.906746	0.907412	0.908365
QC01	0.943624	0.958694	0.933555	0.95992	0.913566	0.939725	0.952347	0.951632	0.964648	0.950167	0.918119	0.935606	0.874041	0.908392	0.885862	0.888134	0.847501	0.860911	0.914753	0.873747	0.891278	0.894546	0.92318	0.907121	1	0.99951	0.999939	0.999924	0.999831	0.999897
QC02	0.943325	0.955363	0.930903	0.96017	0.91612	0.93984	0.952737	0.951596	0.966962	0.952337	0.92064	0.937038	0.878101	0.904778	0.881376	0.885683	0.847776	0.858937	0.914049	0.871083	0.889116	0.896697	0.922202	0.908299	0.99951	1	0.999581	0.999779	0.999903	0.999754
QC03	0.944231	0.958509	0.933288	0.960107	0.914496	0.939907	0.952895	0.952191	0.965323	0.950852	0.9185	0.936178	0.87486	0.908672	0.886003	0.888561	0.848298	0.86153	0.915295	0.873568	0.891682	0.895549	0.923986	0.90761	0.999939	0.999581	1	0.999923	0.999855	0.999944
QC04	0.944445	0.95841	0.933726	0.960742	0.91525	0.940986	0.951907	0.951174	0.96521	0.950256	0.918186	0.93544	0.876559	0.908362	0.88582	0.88829	0.848742	0.861798	0.913654	0.872056	0.889619	0.895222	0.922354	0.906746	0.999924	0.999779	0.999923	1	0.999956	0.999933
QC05	0.943676	0.956769	0.932207	0.960338	0.915413	0.940132	0.952581	0.951644	0.966031	0.951378	0.91932	0.936398	0.876828	0.906604	0.883635	0.887151	0.848201	0.860344	0.913974	0.871688	0.889451	0.895786	0.922436	0.907412	0.999831	0.999903	0.999855	0.999956	1	0.999928
QC06	0.943857	0.957178	0.932149	0.959818	0.914691	0.939489	0.953463	0.952547	0.966138	0.951983	0.919695	0.937046	0.875366	0.90758	0.884664	0.887739	0.847901	0.860684	0.915638	0.873055	0.891541	0.896528	0.924015	0.908365	0.999897	0.999754	0.999944	0.999933	0.999928	1

## Sheet: ST3
Table S3. The results of K-Means cluster analysis.
ID	Group	BMM1	BMM2	BMM3	BMM4	BMM5	BMM6	CMM1	CMM2	CMM3	CMM4	CMM5	CMM6	SMM1	SMM2	SMM3	SMM4	SMM5	SMM6	GMM1	GMM2	GMM3	GMM4	GMM5	GMM6
MEDN1709	4	7791.86	9217.69	4667.65	7106.18	4690.21	7117.95	5443	6973.87	4679.64	29231.7	5632.18	4389.79	15537.3	14611.7	15143.4	96302.6	35169.8	46062	111032	26829.3	19371.1	11419.9	14218.2	92813
MEDP2529	9	1.47327e+07	1.24358e+07	1.05141e+07	1.23254e+07	1.00098e+07	1.15221e+07	1.89216e+06	1.43048e+06	3.10435e+06	3.92011e+06	2.08925e+06	1.41945e+06	2.80539e+06	1.20177e+07	1.21629e+07	3.87253e+06	3.37105e+06	4.48798e+06	6.72801e+06	3.73938e+06	4.23944e+06	4.00672e+06	9.67045e+06	1.5493e+07
MEDP0002	2	143560	127943	5.84973	90225.9	74648	77911.7	0.784545	0.734245	0.725882	0.714881	0.738505	0.717192	51247.6	84384.1	92682.3	94326.4	54133.1	62323.4	19361.8	119639	36059.8	43817.1	41966.7	112598
MEDP2003	4	77081.1	83096.5	155505	87119.2	5.81109	133413	47341.9	92295.4	147105	56975.3	37715.6	91485.5	106169	411119	466122	272992	123985	330288	418920	318748	310715	344992	129978	487206
MEDP1061	9	3.10526e+08	2.75178e+08	2.87919e+08	2.78253e+08	2.76635e+08	292377490	220523792	2.50722e+08	2.54542e+08	2.47583e+08	2.50195e+08	2.01702e+08	2.42873e+08	2.65496e+08	2.93127e+08	2.40885e+08	258386214	2.47863e+08	248794170	2.76669e+08	244069364	2.38252e+08	2.38132e+08	2.98799e+08
MEDP0013	6	2.57509e+06	3.01074e+06	3.66215e+06	5.65648e+06	3.88884e+06	5.99515e+06	3.77647e+06	4.93279e+06	4.39937e+06	4.37619e+06	5.15814e+06	4.14865e+06	823667	1.3892e+06	3.2573e+06	3.6738e+06	1.37696e+06	2.51811e+06	1.38671e+06	2.50021e+06	2.07644e+06	2.47715e+06	2.3865e+06	3.29274e+06
MEDN0007	8	106745	87691.2	93963.9	81932.4	53147.4	67341.4	65874.8	84136.9	99715.9	97194.1	67328.1	77981.5	153738	653712	374234	194095	69973.7	446193	341147	240918	219033	112798	156966	323864
MEDN0009	9	3.33971e+06	1.41611e+06	446101	774298	520383	2.06163e+06	5.00256	5.00256	5.00256	5.00256	5.00256	5.00256	576092	466165	594924	644706	214037	529050	664799	584336	501220	337164	479686	660162
MEDN0010	1	379427	505496	192933	132829	194736	313276	122809	547986	539297	524023	444011	210362	59641	764774	700241	244307	9656.49	2.17038e+06	2.55621e+06	2.25988e+06	1.75696e+06	912505	281178	3.0108e+06
MEDP0387	8	96829.1	80500.5	55726.8	80825.5	17578	64539.5	33298.2	9.2899	38621.7	28163.3	141437	44408.4	84609.5	276025	180656	169420	59077.6	191636	75699.7	56637.3	156630	71074.7	12224.6	115925
MEDN0047	5	19453.4	20850.6	8343.14	3413.07	2006.54	24316.2	1384.01	4.20543	4607.85	3225.51	4.20543	1689.9	6948.38	19686.1	70998.7	51563.4	6.74506	13351.2	18205.7	20685.9	9046.59	9980.23	3473.76	21970.5
MEDP0020	5	50754.1	35457.8	77841.7	78825.3	140448	52408.1	24361	7842.19	20294.1	4645.9	39695.3	10641.2	26049.5	107324	115098	35517.3	32050.8	65747.7	28529.2	33285.9	46457.1	42081.2	86930.1	61037.4
MEDP0519	9	2.23658e+06	3.52025e+06	3.13794e+06	3.04057e+06	2.3919e+06	2.79948e+06	338334	444474	695371	395611	664178	419038	1.36571e+06	1.92765e+06	2.52572e+06	1.8418e+06	1.08288e+06	1.48634e+06	842882	2.23343e+06	1.07353e+06	1.09312e+06	795035	2.8342e+06
MEDP1778	9	5.07214e+06	2.56721e+06	2.281e+06	3.0544e+06	2.32848e+06	2.64099e+06	461981	851251	551721	610055	448720	552250	1.38648e+06	4.0668e+06	3.7878e+06	1.07943e+06	1.05683e+06	1.45444e+06	3.35555e+06	628190	1.28511e+06	836479	3.72815e+06	1.92157e+06
MEDP0012	7	180472	267819	250433	287761	285349	312219	212956	274770	293363	331225	327635	244933	323641	317839	324784	247115	60896.5	263218	123146	451732	341916	348751	160381	242280
MEDP0022	9	2.30792e+07	1.18093e+07	1.89274e+07	6.62481e+06	3.88757e+07	3.45447e+07	5.92497e+06	8.05537e+06	6.44082e+06	9.23815e+06	1.32454e+07	4.61082e+06	1.11887e+06	2.26447e+06	1.87424e+06	1.52105e+06	687636	2.33197e+06	6.92358e+06	4.58933e+06	3.84331e+06	2.55628e+06	1.29818e+07	7.18031e+06
MEDN0005	5	12010.4	27793.2	18329.3	25312.4	32233	40073.1	8841.22	30116.7	20603.2	14791.5	18753.9	26413	14205.8	85355.8	106849	54406.3	6.5267	36027.4	6867.46	2144.03	2861.04	10300.8	2861.04	8309.27
MEDN0019	2	301517	180465	216430	195131	94947.5	488005	37886.9	33069.3	49075.7	30746.4	46459.7	51521	80752.2	351950	534118	185513	21953.7	217873	159692	667248	261673	234760	128573	761378
MEDP0026	9	5.07214e+06	2.56721e+06	2.281e+06	3.0544e+06	2.32848e+06	2.64099e+06	461981	851251	551721	610055	448720	552250	1.38648e+06	4.0668e+06	3.7878e+06	1.07943e+06	1.05683e+06	1.45444e+06	3.35555e+06	628190	1.28511e+06	836479	3.72815e+06	1.92157e+06
MEDP0685	8	240334	199082	136645	129416	84040.1	195015	56524.2	53348.1	84027	48744.8	86763.3	48507.7	2.40945e+06	2.90162e+06	4.14767e+06	3.1419e+06	1.92869e+06	4.32828e+06	767076	1.26319e+06	1.48778e+06	1.07707e+06	656475	2.15436e+06
MEDP2320	8	2.57719	2.57719	2.57719	2.57719	2.57719	2.57719	50407.3	65734.9	36340.3	64045	62490	37623.6	168429	905779	687218	626606	65789.2	487945	7.10738	506413	571531	250639	121757	338786
MEDP1996	3	1.95035e+06	1.2898e+06	1.25963e+06	1.05745e+06	1.34703e+06	1.62627e+06	4.05743e+06	8.49746e+06	3.93928e+06	2.429e+06	6.25989e+06	8.148e+06	1.23245e+06	1.38374e+06	1.6209e+06	4.18438e+06	3.01523e+06	1.27189e+06	812994	1.36041e+06	1.34593e+06	1.33651e+06	1.73034e+06	1.03656e+06
MEDP0074	1	40854.4	24028.5	53144.7	56865.5	28974.2	57487	144001	160574	166604	242774	325044	166604	301745	216710	450375	339749	249711	171342	232287	841488	691935	660126	341604	590146
MEDP1005	6	2.57509e+06	3.01074e+06	3.66215e+06	5.65648e+06	3.88884e+06	5.99515e+06	3.77647e+06	4.93279e+06	4.39937e+06	4.37619e+06	5.15814e+06	4.14865e+06	823667	1.3892e+06	3.2573e+06	3.6738e+06	1.37696e+06	2.51811e+06	1.38671e+06	2.50021e+06	2.07644e+06	2.47715e+06	2.3865e+06	3.29274e+06
MEDP1307	1	384706	395252	410042	387400	357050	314545	321690	405498	374271	387714	417663	243918	338645	360962	411083	359084	346086	378089	476726	544752	584698	469135	448743	570334
MEDN2099	8	8470.9	12834.9	13027	16483.3	13558	21048.1	78136.5	42969.5	33785	68880.6	47828.3	37923.4	21302.1	46216.6	65683.9	102037	169559	77073.1	44003.9	41273.7	62848.7	55799.9	21575.1	54406.1
MEDP1126	9	78646.8	89826	59443.9	50739.8	53435.9	60247.3	21737.4	37219.9	38969.9	36715.8	30354.8	31907.5	61061.4	50241.6	56608.6	64745.7	43333.3	60179.5	47481.5	37092.2	25479	32733.4	37841.7	31470.4
MEDP2132	9	2.30792e+07	1.18093e+07	1.89274e+07	6.62481e+06	3.88757e+07	3.45447e+07	5.92497e+06	8.05537e+06	6.44082e+06	9.23815e+06	1.32454e+07	4.61082e+06	1.11887e+06	2.26447e+06	1.87424e+06	1.52105e+06	687636	2.33197e+06	6.92358e+06	4.58933e+06	3.84331e+06	2.55628e+06	1.29818e+07	7.18031e+06
MEDP0147	4	1.7467e+06	1.71775e+06	1.51967e+06	1.18933e+06	616148	1.55762e+06	7.47098	140774	165192	133756	177039	69022.8	639304	4.38187e+06	7.34777e+06	4.95959e+06	185864	2.58931e+06	5.9187e+06	6.14523e+06	4.16694e+06	1.97843e+06	823140	9.92471e+06
MEDP1974	1	1.81637e+06	1.82839e+06	3.75563e+06	1.92401e+06	1.92965e+06	3.40436e+06	3.78059e+06	5.49534e+06	5.32844e+06	5.02615e+06	6.02803e+06	6.77353e+06	7.63831e+06	8.09474e+06	7.09915e+06	4.08235e+06	3.16918e+06	4.24746e+06	4.22608e+06	8.01523e+06	6.26757e+06	7.04083e+06	9.48564e+06	9.00414e+06
MEDN0472	1	17.0258	17.0258	17.0258	17.0258	17.0258	17.0258	59194.4	108573	93395.8	58476	123731	62612	78836.7	104026	87288.7	99300.4	53556.4	73854.4	134512	130544	192732	110025	43444	71515.1
MEDP0617	3	54481.5	40770.6	70163.4	53935.6	37177.9	55179.7	762699	929732	962741	453370	808131	608794	470436	359352	406344	314471	256416	193969	72156.3	462006	464164	287965	261655	205686
MEDP2533	7	116916	117679	106495	131278	110215	99039.6	1.14978e+06	1.13606e+06	1.81996e+06	3.9169e+06	2.53959e+06	1.15199e+06	238445	266885	335975	391520	417486	246879	754033	1.14607e+06	1.161e+06	1.21654e+06	748021	1.086e+06
MEDN1246	5	129801	109699	181870	102152	45224.8	145733	10040.4	24919.9	27689.3	38932.9	8127.1	31144.9	41033.8	423989	664878	223627	23726.7	217760	89736.2	82383.7	79989.5	76844	87264.3	232442
MEDN2103	4	11361.5	8954.3	12629.4	10767.8	1923.6	15832.1	707.331	435.106	1492.52	455.684	633.145	734.256	6312.03	28361.9	67584.8	27659.5	5951.55	20198.7	8855.6	35832.2	6913.81	9704.05	10076.3	39381.7
MEDP0034	4	312916	231736	266963	159245	88976.7	247876	122005	113464	59578.3	187799	180153	88571.7	229524	973447	1.75951e+06	729884	72356.2	726024	1.22362e+06	2.0099e+06	1.04414e+06	526681	226290	2.60332e+06
MEDP1020	4	130107	168099	160054	158871	167066	154780	68634.4	74118.8	80332.9	17816.1	83460.4	68395.6	246845	240542	174340	174891	120293	123975	163073	523310	424343	374078	350746	195962
MEDP0297	4	5.75127	5.75127	5.75127	5.75127	5.75127	5.75127	19765.7	11861.1	26375.5	14500.2	10.6589	23717.2	40796.7	34944.2	28129.3	30520.5	16648.7	33993.1	51226	27668.1	42502.8	13180.2	22397.6	30299.4
MEDP0036	4	1.87522e+07	1.7496e+07	9.64328e+06	1.39748e+07	9.56517e+06	1.66134e+07	7.60084e+06	8.30332e+06	1.10627e+07	1.33245e+07	6.95332e+06	6.40819e+06	1.51005e+07	2.41623e+07	4.074e+07	2.12456e+07	3.75249e+06	2.16004e+07	7.31405e+06	4.43593e+07	3.49957e+07	3.15796e+07	3.52525e+07	4.46901e+07
MEDN1518	2	76915.2	72579.1	46854.9	73869.6	51520.1	66049	55262.5	25193.8	34939.6	31040.4	50829.4	55659.5	24056	20190.1	26251.1	27560.1	31965	34203.9	39914.7	53537.8	46019.4	71233.5	78107.2	60982.4
MEDP0087	4	2.54694e+06	2.13361e+06	1.91193e+06	1.90528e+06	1.89994e+06	2.35336e+06	1.93276e+06	1.35425e+06	2.83903e+06	2.52642e+06	1.59352e+06	1.68014e+06	4.68136e+06	3.23738e+06	5.98993e+06	2.92901e+06	4.91413e+06	2.86314e+06	3.29613e+06	3.54474e+06	2.78235e+06	2.94723e+06	4.58772e+06	4.29596e+06
MEDP1490	6	2.4292e+06	2.65267e+06	2.95989e+06	2.58588e+06	4.11136e+06	3.7782e+06	2.40337e+06	2.52081e+06	2.62845e+06	3.05207e+06	2.46089e+06	2.43766e+06	1.90552e+06	1.91647e+06	3.67345e+06	1.82109e+06	272077	2.56992e+06	2.06364e+06	2.13963e+06	2.52555e+06	1.68684e+06	1.41822e+06	2.19692e+06
MEDP2344	6	2.4292e+06	2.65267e+06	2.95989e+06	2.58588e+06	4.11136e+06	3.7782e+06	2.40337e+06	2.52081e+06	2.62845e+06	3.05207e+06	2.46089e+06	2.43766e+06	1.90552e+06	1.91647e+06	3.67345e+06	1.82109e+06	272077	2.56992e+06	2.06364e+06	2.13963e+06	2.52555e+06	1.68684e+06	1.41822e+06	2.19692e+06
MEDP2528	4	17508949	1.33494e+07	9.1621e+06	1.13743e+07	9.89756e+06	1.64896e+07	4.2725e+06	8.21249e+06	8.52488e+06	1.3903e+07	7.73045e+06	5.70336e+06	3.56655e+07	3.53639e+07	50453387	2.01494e+07	3.09726e+06	2.41701e+07	3.34557e+07	2.60382e+07	2.05849e+07	1.91793e+07	1.45012e+07	3.36843e+07
MEDP1933	1	1.81637e+06	1.82839e+06	3.75563e+06	1.92401e+06	1.92965e+06	3.40436e+06	3.78059e+06	5.49534e+06	5.32844e+06	5.02615e+06	6.02803e+06	6.77353e+06	7.63831e+06	8.09474e+06	7.09915e+06	4.08235e+06	3.16918e+06	4.24746e+06	4.22608e+06	8.01523e+06	6.26757e+06	7.04083e+06	9.48564e+06	9.00414e+06
MEDP1973	4	1.89337e+06	2.15603e+06	3.20561e+06	2.14177e+06	2.19649e+06	2.47434e+06	538623	850483	1.05072e+06	1.42471e+06	915932	786755	5.24609e+06	5.42754e+06	2.72518e+06	2.10128e+06	2.38199e+06	2.47916e+06	1.70799e+06	6.59059e+06	1.52189e+06	3.281e+06	7.29821e+06	8.76802e+06
MEDP0071	8	0.0870095	0.0870095	0.0870095	0.0870095	0.0870095	0.0870095	202.737	89.3394	116.246	167.363	60.9526	327.197	1629.11	168.124	290.816	400.5	686.227	332.149	0.0594774	0.0594774	0.0594774	0.0594774	0.0594774	0.0594774
MEDP0859	6	41366.3	30717.8	89058	47661.6	25342.5	12227	26157.9	20155.5	21901.2	30153.7	13652	64470.6	4.34047	4.34047	4.34047	4.34047	4.34047	4.34047	1.34086	1.34086	1.34086	1.34086	1.34086	1.34086
MEDN0041	4	11371.3	23858.2	26839	14396.3	9447.49	27567.5	25667.5	28383.2	30078.9	205568	42961.7	24435.4	123594	109761	250176	695895	262068	425688	577400	487698	554351	265800	136932	941016
MEDN0323	4	984411	784428	614595	354196	502360	628879	403216	341191	317830	276306	650398	656083	731167	1.04635e+06	930450	1.17599e+06	1.9917e+06	596639	791074	2.7803e+06	1.03422e+06	1.1498e+06	2.20091e+06	1.02099e+06
MEDP0051	7	166309	126011	119930	162829	165169	118191	247687	337439	257584	186350	151281	233858	126782	115720	93582.8	127826	107461	101796	150047	260984	218598	199930	124312	210860
MEDP2131	4	184366	215412	253832	196300	163711	188824	158253	188266	111761	119086	169935	216575	71932.8	431976	430467	237488	199554	120624	147888	389176	241747	227218	44527.6	1.03289e+06
MEDP2322	7	63812.8	53468.7	43368.3	23.4659	23.4659	43268.6	113409	99971.3	99606.3	97783.9	81830.7	99910.5	42189.2	64810.9	58709.6	59178.3	51112.6	62693	71724.5	91115.7	98965.3	109024	109111	119315
MEDP2435	3	17343.2	17746.9	90403.7	8846.91	40740.3	26767.1	167187	191362	99764.7	38408.2	131658	18664.1	9.95195	9.95195	9.95195	9.95195	9.95195	9.95195	16796.2	4773.6	20164.7	9135.84	4737.52	12277.8
MEDP0318	2	1.62898e+06	873366	687717	389790	437036	1.12636e+06	134803	208176	199527	351370	244167	285164	81045.2	583964	762232	199667	28657.9	141496	1.7421e+06	2.12073e+06	1.76785e+06	388842	2.63153e+06	2.21334e+06
MEDN1686	3	1.36705e+07	1.08139e+07	4.82797e+06	9.22294e+06	4.97172e+06	1.04645e+07	6.54659e+06	2.52116e+07	2.16052e+07	7.76857e+07	3.49359e+07	1.42338e+07	144013	1.52668e+06	3.19575e+06	1.34243e+06	5.13766	1.0242e+06	3.39065e+06	2.00577e+06	1.93508e+06	3.06561e+06	1.65632e+06	3.96898e+06
MEDN1200	4	483154	583283	590808	298770	281024	326619	240129	101084	183279	35110.8	234675	191142	400778	695905	538306	460758	743542	641901	355848	1.13528e+06	963339	807315	569847	387981
MEDP1663	4	205828	279560	323351	89201	131006	310453	91268.9	103031	100853	212746	161233	136155	360789	989652	1.18962e+06	668143	146979	650220	686874	491890	1.25439e+06	457914	207710	820668
MEDP1914	1	109715	134287	127727	138904	87607.6	116266	111115	146434	141398	160707	108220	98276.5	114230	86320	131176	109535	116910	135927	128372	167979	138964	105769	121854	159330
MEDP1962	1	253994	322601	261444	343888	332847	274818	346476	281815	288881	191498	887162	493965	295921	358155	268676	306681	243489	363644	1.23414e+06	2.5276e+06	2.41677e+06	1.10121e+06	1.47419e+06	923512
MEDN1659	1	20.7785	20.7785	20.7785	20.7785	20.7785	20.7785	30698.8	21511.1	21788.7	15531.8	73446.6	53571.8	16976.2	53279.6	37251.5	54600.9	14380.1	24578.2	140404	253057	208258	97479.8	97916.3	62602
MEDN2002	9	69268.4	100289	76475.5	82162	46704.7	106323	20841.7	25243	11510.2	25353.2	21765.6	27468.1	23.2755	23.2181	23.5281	23.527	23.5384	23.5318	35181.4	26855.3	34439.1	24958.1	22736.7	51014.3
MEDN0056	2	17988.5	8926.91	12363.2	9917.04	19870.3	10691.8	3.62014	3.62014	3.62014	3.62014	3.62014	3.62014	8742.64	8907.45	6072.43	5644.21	9500.33	5872.46	16851	8537.38	9672.18	10875.9	15217.5	19227.9
MEDP0525	1	40854.4	24028.5	53144.7	56865.5	28974.2	57487	144001	160574	166604	242774	325044	166604	301745	216710	450375	339749	249711	171342	232287	841488	691935	660126	341604	590146
MEDN1784	6	45875.1	94860.3	69229.2	62327.5	48447.2	54452.7	114842	48845.2	70750.4	132056	101233	69135.9	14.2321	14.2321	14.2321	14.2321	14.2321	14.2321	23743.7	28398.9	24420	23152.1	23883.1	36774.1
MEDP0064	7	239753	219886	197146	189624	194395	223348	295677	297047	362556	270663	276646	268336	212549	187781	173663	210203	168419	203524	279861	265126	284298	263911	231746	260288
MEDN0058	6	1.28671e+07	1.27107e+07	1.6864e+07	3.7631e+07	1.85573e+07	1.51416e+07	2.70685e+07	1.05661e+07	1.68624e+07	1.51042e+07	2.54819e+07	1.81722e+07	823627	1.48429e+06	766101	883437	2.76238e+06	914184	6.55702e+06	2.51782e+06	2.24153e+06	4.37781e+06	7.53427e+06	4.62508e+06
MEDP0880	8	151086	64311.9	79773.9	54230.3	42080.9	60302.3	31254.2	25222.1	34052.6	53322.2	35034.9	25969.9	128190	543280	315429	271183	63672	266506	117042	105012	81115.3	22911.5	58579.3	105507
MEDN0843	8	13593.6	7913.4	11122.7	11142.9	4109.28	5449.2	3042.34	4581.32	2216.65	6945.1	3103.4	2705.42	10172.7	60196.6	28257	25387.7	8379.52	30688.5	16698.5	16733.1	11980.9	2848.06	7985.45	17732.3
MEDP2346	3	2.51699e+06	1.69015e+06	1.42454e+06	1.6685e+06	1.91812e+06	3.03652e+06	6.00132e+06	12359122	4.99797e+06	3.47272e+06	8.12377e+06	1.03542e+07	2.99022e+06	2.84708e+06	2.75142e+06	8.2318e+06	6.57465e+06	1.85421e+06	1.49867e+06	1.42992e+06	1.87274e+06	1.33325e+06	2.16895e+06	1.3054e+06
MEDP1942	5	229137	175852	179319	178236	163090	172776	149476	125622	145548	176556	152615	128736	154784	141645	211111	283543	230239	224469	76931.1	138423	147534	167875	191421	113156
MEDP0878	8	256531	139768	162319	230913	129623	201145	310616	375651	270405	600038	327771	295373	331932	1.10171e+06	758654	243073	46444	329640	211169	183075	337228	272958	577713	266704
MEDP0868	3	2.51699e+06	1.69015e+06	1.42454e+06	1.6685e+06	1.91812e+06	3.03652e+06	6.00132e+06	12359122	4.99797e+06	3.47272e+06	8.12377e+06	1.03542e+07	2.99022e+06	2.84708e+06	2.75142e+06	8.2318e+06	6.57465e+06	1.85421e+06	1.49867e+06	1.42992e+06	1.87274e+06	1.33325e+06	2.16895e+06	1.3054e+06
MEDN1861	5	43100.9	47793.5	46070.3	50336.4	48152.4	44074	33139.2	54519.8	31364.8	37129.4	36719.2	53927.6	52147	44020.4	49770.6	52669	64369.3	47832.5	39434.4	40888.7	38503	37164.9	41743.2	34926.1
MEDN1410	7	144704	136133	153524	133342	147986	135889	142114	158868	133300	159597	148015	139575	130902	139569	131332	135903	138710	132286	151435	158046	147261	141193	140721	146890
MEDN0827	8	127395	87294.6	115665	89609.1	63931.3	102582	60517.8	95932.6	110147	102103	61048.7	62324.6	162246	718863	449178	299397	55328.5	465936	249903	264432	143855	106252	144069	339222
MEDN1915	8	91458.3	42494.8	85819.9	195268	165191	68852	222942	89412.5	139879	290718	241263	249855	3.89696e+06	1.008e+07	7.0356e+06	6.15285e+06	3.59818e+06	6.99608e+06	4.753e+06	3.76942e+06	2.16556e+06	2.71235e+06	4.6206e+06	3.99659e+06
MEDN2039	4	11779.3	11784	10349.8	5194.45	6156.33	12746	7.20422	7.20422	7.20422	7.20422	7.20422	7.20422	22589.9	12337.4	51474.8	214150	58382.8	163723	323829	163080	98699.6	66168.5	55707.9	384572
MEDN0579	5	7825.29	4869.08	4760.61	5193.74	4262.52	6348.76	1482.53	2351.76	1352.1	2741.19	4054.36	3129.79	5424.13	5122.08	7317.48	7074.32	12622.3	7258.54	2248.94	2686.12	2011.85	1738.78	2969.01	1482.39
MEDP2336	6	276641	262261	216556	141403	172160	263116	237494	100011	244241	154279	167633	185296	143292	272182	176826	199518	34476.2	173557	100544	76964.7	87394.1	108280	163551	178290
MEDN0616	7	378011	412771	521506	364240	327449	477359	440996	634589	529088	481815	553112	513982	325953	510628	455334	345386	292809	413498	533321	526137	640841	653060	553956	584308
MEDN1944	3	227643	401080	236559	464488	279414	240427	469917	1.14636e+06	654319	301197	229308	480676	41872.3	239255	52947.7	56796.6	90100.7	75418.8	150830	237621	187465	151668	63466.1	236901
MEDP2587	9	108242	78139.1	89398.5	84574.7	81781.5	110279	37842.5	52184.5	51237.4	38619.1	53825.5	39548.2	65059.7	58388	71992.5	53145.3	56235.7	60227.9	61790	69966.9	72605.2	43748.2	55273.1	68018.1
MEDP0637	4	3.82269	3.82269	3.82269	3.82269	3.82269	3.82269	44212.4	18079.7	29098	34146.3	15765.6	72892.2	139767	56812.4	52821.9	79510	509436	85435.6	137721	49327.4	130327	41401.7	543394	24857.9
MEDP2488	7	488626	528114	543032	538729	647862	704101	977473	911471	739642	1.17351e+06	787017	731751	629284	590716	561843	621649	507323	548508	741933	832776	726313	846133	687559	664599
MEDN1918	8	55901.5	127775	99814.1	81169.2	54554.3	54559	97006.1	118055	127344	97488.7	131820	113589	705971	407335	640858	1.10239e+06	523532	771694	337761	511935	422151	258164	295936	577274
MEDP1356	7	182102	155612	78164.5	10.8254	144293	111496	133835	146548	196271	133864	120515	197210	53688.1	129490	150019	98889.3	56334.4	71006.2	221029	104002	148746	146312	179596	170500
MEDN2098	1	29978.7	25639.3	28357.9	53770.3	27293.7	52347.2	112982	97948.4	117887	256146	202307	100474	64094	95058	76392.5	261497	147458	109251	129934	291745	488713	325311	290851	247946
MEDP0083	6	2.4292e+06	2.65267e+06	2.95989e+06	2.58588e+06	4.11136e+06	3.7782e+06	2.40337e+06	2.52081e+06	2.62845e+06	3.05207e+06	2.46089e+06	2.43766e+06	1.90552e+06	1.91647e+06	3.67345e+06	1.82109e+06	272077	2.56992e+06	2.06364e+06	2.13963e+06	2.52555e+06	1.68684e+06	1.41822e+06	2.19692e+06
MEDN1306	8	46966.4	162455	124367	98981.5	69841.9	69829.8	87050.8	87090	157089	95880.8	152828	110520	791076	368434	700334	1.1078e+06	608875	888124	352333	539532	406729	319570	304699	549500
MEDP2334	3	532677	351921	320458	340279	483162	342983	497405	551807	408309	295357	466865	617858	519417	457021	369509	466049	506298	306545	128662	85910.2	126442	132116	142799	132348
MEDP1740	8	0.823415	0.823415	0.823415	0.823415	0.823415	0.823415	316.432	177.971	716.902	148.134	108.175	501.64	4337.28	3903.04	3138.94	2145.11	3824.2	4717.24	425.507	0.0658912	1013.72	0.0658912	977.063	445.165
MEDP1646	3	113309	81401.5	36910.8	46980.5	55369.9	99876.2	87023.8	119768	82305.8	95434.8	102935	47128.3	59806.1	79082.3	84059	40511.3	67130.9	21815.9	62020.2	79769.1	59884.8	60088.1	48062	67777.6
MEDP1494	3	446526	372813	288564	213640	305486	369250	1.30129e+06	1.78467e+06	424703	171293	1.91552e+06	1.97644e+06	41251.2	29468.7	56575.9	139022	131589	72429.8	36072.9	64107.1	71151.2	5.22328	82419.6	73027.5
MEDN0682	9	97491.3	105351	92191.1	92198	154687	77404	74977.1	66351.2	69785.1	96344.9	81563.7	74846.5	85531.2	92822.7	82327.4	66126.9	108608	77852	72789.3	63921	72823.7	85507.3	79864.5	66033.8
MEDP0574	5	1.92905e+06	2.91108e+06	5.09075e+06	744374	2.43843e+06	708448	2.02479e+06	351148	448512	500544	3.9555e+06	653314	3.02258e+06	1.63251e+06	4.26121e+06	8.52349e+06	6.06744e+06	3.45788e+06	2.31671e+06	256605	982129	1.03171e+06	911637	803371
MEDP1795	9	62058.4	56242	72136.9	50914.9	69662.4	53003.8	27814.6	37955	29374	22264.8	35269.7	34522.5	40844.4	36645	31543.4	39284.7	29211.6	38823.5	40275.9	41081.2	33513.4	41549.2	46444.8	37712.9
MEDP0894	6	211062	257996	304389	87704	136320	78606.6	52741.1	10.7591	59876.9	486333	53568.1	396462	81499.5	67164.8	206840	172417	90443.9	148026	95181.6	117772	127170	158152	123254	149431
MEDN1511	1	41625.3	49445.4	80572.6	53594.4	43337.1	36276.9	98129.2	79567	65411.7	35447.9	99776.5	89229.4	67369.3	71525.4	114466	90788.9	40671.4	69494.8	24963	112546	125987	101968	94146.1	47118.6
MEDN0117	1	41625.3	49445.4	80572.6	53594.4	43337.1	36276.9	98129.2	79567	65411.7	35447.9	99776.5	89229.4	67369.3	71525.4	114466	90788.9	40671.4	69494.8	24963	112546	125987	101968	94146.1	47118.6
MEDN1193	8	49439.4	85047.2	77606.2	145224	33168.1	79502.4	1.31847e+06	1.29914e+06	1.28225e+06	419126	1.16435e+06	553718	1.65018e+06	1.47694e+06	1.57892e+06	1.5342e+06	578657	848324	971856	985256	712730	787777	593126	809139
MEDP0892	7	5.13404e+06	5.00327e+06	4.97693e+06	5.04559e+06	5.09453e+06	5.01834e+06	5.589e+06	6.15729e+06	6.34883e+06	6.33904e+06	5.90574e+06	5.23583e+06	4.32875e+06	4.1383e+06	4.16558e+06	3.89726e+06	4.25736e+06	4.31445e+06	6.17487e+06	5.40776e+06	5.59812e+06	5.67325e+06	5.13936e+06	6.18416e+06
MEDN0647	7	1.47732e+06	1.23979e+06	2.12863e+06	1.54447e+06	1.47484e+06	1.15917e+06	4.86697e+06	4.57525e+06	3.1696e+06	1.62241e+06	4.06101e+06	3.13497e+06	2.36935e+06	1.78993e+06	4.42234e+06	2.42965e+06	1.35411e+06	1.48247e+06	734978	3.85276e+06	4.12554e+06	3.17287e+06	2.03644e+06	1.67753e+06
MEDN1549	3	74032.9	86078.6	74489.2	90314.3	68110.1	62449.4	75200.2	91471.3	76776.2	69575.1	105110	90313.8	83626.6	81185.3	73257.1	56917.6	97471.2	78808.3	84842.3	72583.6	92468.6	71041.9	70709.7	78682.3
MEDN1191	8	212976	370646	339629	559422	128643	251215	4.85419e+06	4.84174e+06	4.72263e+06	1.4899e+06	4.36197e+06	2.07723e+06	6.49921e+06	5.60244e+06	6.06122e+06	6.20793e+06	2.35808e+06	3.34614e+06	3.59779e+06	3.75582e+06	2.77559e+06	3.01599e+06	2.2186e+06	2.84638e+06
MEDP1003	9	78646.8	89826	59443.9	50739.8	53435.9	60247.3	21737.4	37219.9	38969.9	36715.8	30354.8	31907.5	61061.4	50241.6	56608.6	64745.7	43333.3	60179.5	47481.5	37092.2	25479	32733.4	37841.7	31470.4
MEDP0798	1	118154	115848	149254	136948	123753	129615	137026	132580	179267	128481	147173	128903	139676	107609	114129	141438	82716.5	119821	204142	120426	248252	160598	150370	143167
MEDN1231	8	53305.8	45034.3	45054.5	57089.2	44592.4	52690.4	50952.8	55014.4	49184.1	54448.9	58893.4	64193.5	52406	51299.8	44159.7	53494	67068.7	66902.1	47409.5	63980	59911.1	50581.9	50213.1	55015.5
MEDN1837	5	7.2669e+06	7.21402e+06	6.49432e+06	6.44871e+06	6.3115e+06	6.9805e+06	6.48265e+06	6.3042e+06	5.92987e+06	6.18981e+06	5.83113e+06	5.83598e+06	6.62367e+06	6.45278e+06	7.34542e+06	7.32436e+06	7.16964e+06	6.47201e+06	5.83356e+06	6.20319e+06	6.15802e+06	6.0198e+06	6.10787e+06	6.24565e+06
MEDN0554	8	386266	422817	441944	425696	445630	446251	490206	462607	512689	476192	493612	518090	577090	472700	439934	578045	644629	400673	458452	513626	442250	445342	511388	482805
MEDN2155	7	95678.2	66817.5	94667	82162.4	97147.3	99503.8	183648	189790	190179	183170	195544	189223	100867	100301	95304.1	88751.5	88538.2	79350.9	187499	229624	188398	211433	159546	184106
MEDP2633	5	171955	168733	156685	163524	156709	144880	122116	133083	136033	139176	135413	128584	131624	175358	185594	175084	164046	130127	139136	147920	148338	136419	187752	63145.6
MEDP2104	1	161882	157882	167148	174569	121717	246218	188703	191605	235348	202715	193919	189014	93966.9	206481	269248	136595	68641.8	162676	224537	294403	233011	273819	184363	346762
MEDP0669	7	6.69888e+07	6.70534e+07	6.62216e+07	6.52367e+07	6.58358e+07	6.60172e+07	7.50674e+07	8.56129e+07	8.88573e+07	8.59261e+07	8.6969e+07	7.14967e+07	5.75476e+07	6.02782e+07	6.34797e+07	6.07902e+07	5.87642e+07	5.92235e+07	9.0295e+07	9.06866e+07	9.17985e+07	9.1844e+07	7.51809e+07	8.74704e+07
MEDP1898	6	1.17546e+08	1.13315e+08	1.09584e+08	1.18023e+08	1.07202e+08	1.1071e+08	111402076	1.36547e+08	1.1166e+08	1.2412e+08	1.2253e+08	8.63674e+07	6.25114e+07	6.60627e+07	6.0262e+07	6.26383e+07	6.12065e+07	5.80762e+07	8.15355e+07	1.0774e+08	9.4804e+07	9.78221e+07	8.49422e+07	9.28714e+07
MEDP2408	4	264949	392415	479004	317839	620040	232849	58652.8	96589.4	105007	78500.8	118689	75914.4	778101	7.64665e+06	1.23074e+07	1.27908e+07	4.30542e+06	7.772e+06	7.34542e+06	9.0693e+06	1.70248e+06	1.08417e+07	1.01513e+07	4.26608e+06
MEDP2139	7	164570	200089	188606	123844	174449	188812	228860	227903	251913	251209	275032	234418	146844	205495	207301	244824	142390	119417	237856	257950	247714	261689	236829	236715
MEDN0410	5	177233	183250	187707	175596	166711	173478	168415	101469	125315	129500	110101	111466	218660	222694	201939	220732	198343	166537	108845	98718.3	124849	90363.2	150517	121382
MEDP2664	1	12641.9	8840.45	7761.77	33439.9	10674.6	26089.3	62396	40113.7	40519.2	77351.6	70641.5	66709.4	41108.6	25435.3	7511.09	13725.3	4902.87	33520.8	51534.1	106000	98179.9	111935	34005.7	65342.6
MEDN1483	8	960403	664394	1.30186e+06	345305	978310	532391	2.96984e+06	2.29803e+06	3.49541e+06	1.65152e+06	3.79631e+06	2.70807e+06	4.01692e+06	4.12854e+06	4.29961e+06	3.77101e+06	2.13694e+06	2.84437e+06	565477	6.28847e+06	3.57954e+06	5.01587e+06	3.23974e+06	3.35575e+06
MEDN1606	7	361277	321872	321236	245096	307414	329512	384340	403033	378691	401074	370829	382138	297124	309198	303995	308864	262172	319423	360213	380319	368631	389041	360456	363044
MEDN2050	7	157311	358378	367593	176363	270572	224538	696872	867671	721536	691223	568511	513300	273681	419866	55539	171327	515517	37569.2	595350	886774	685143	815870	534226	695180
MEDN1802	6	79978.2	71161.8	63013.3	68789.6	71244.6	77733.3	74162.9	79051.2	61123.6	80177.5	72628.2	52171.4	37396	36551	25694.3	33779.1	37122.5	29640.9	36559.9	42831.7	39460	49946.4	38643.7	43198.9
MEDP2389	3	117450	179924	287112	323332	243361	109923	270864	405659	333408	329710	346596	324306	78730.1	129024	49539.4	146799	63971.2	87308.2	190483	89188.5	69298.5	138076	122451	62570.6
MEDP1907	5	1.92905e+06	2.91108e+06	5.09075e+06	744374	2.43843e+06	708448	2.02479e+06	351148	448512	500544	3.9555e+06	653314	3.02258e+06	1.63251e+06	4.26121e+06	8.52349e+06	6.06744e+06	3.45788e+06	2.31671e+06	256605	982129	1.03171e+06	911637	803371
MEDP2525	7	495232	542180	453000	481405	497832	450344	589498	624094	636625	633745	624166	486310	457708	470544	389744	535871	586472	465244	532520	559541	470164	564420	516278	563752
MEDN1224	3	2.75227e+07	1.78336e+07	1.58186e+07	1.22738e+07	2.30331e+07	2.46671e+07	2.95945e+07	3.85093e+07	3.1113e+07	4.015e+07	3.64963e+07	2.76739e+07	8.1813e+06	8.21152e+06	1.08384e+07	1.01133e+07	6.4862e+06	1.12998e+07	1.14235e+07	1.6092e+07	1.23786e+07	1.34318e+07	1.46165e+07	1.92584e+07
MEDN1302	4	3.48075	3.48075	3.48075	3.48075	3.48075	3.48075	37384	11.683	11.683	401575	29899	46786.7	964413	646633	1.44584e+06	1.12817e+06	780773	1.1121e+06	919321	1.06449e+06	953724	888900	740237	934120
MEDP2458	9	3.44427e+06	4.11454e+06	4.1918e+06	3.99637e+06	3.7983e+06	3.43279e+06	2.64487e+06	3.86472e+06	3.32614e+06	3.32142e+06	3.51717e+06	2.81098e+06	4.13343e+06	3.19513e+06	3.8443e+06	3.00038e+06	3.72768e+06	3.76484e+06	3.71412e+06	3.33391e+06	3.32137e+06	3.10011e+06	2.77041e+06	3.39178e+06
MEDP2068	2	1.04296e+07	9.92976e+06	1.24565e+07	1.08238e+07	1.0989e+07	9.24221e+06	1.02059e+07	1.05971e+07	9.28454e+06	1.09273e+07	9.68923e+06	8.11678e+06	1.15558e+07	9.52938e+06	1.0304e+07	9.98119e+06	1.04471e+07	9.60704e+06	1.3539e+07	9.53447e+06	1.03392e+07	9.30357e+06	9.71732e+06	9.93946e+06
MEDP1298	6	438731	782277	261264	378842	701111	380520	439889	74272.1	164908	76496.2	514358	894671	9.22892	9.22892	9.22892	9.22892	9.22892	9.22892	112642	66137.9	187579	118690	411594	359459
MEDP2436	1	603360	972592	908117	1.1049e+06	1.8959e+06	955608	1.13297e+06	1.23821e+06	1.27673e+06	1.14157e+06	854481	682767	752162	522822	1.49091e+06	862763	1.074e+06	860611	1.23769e+06	1.25177e+06	1.50014e+06	1.14003e+06	1.04256e+06	1.22373e+06
MEDP0125	3	108621	171303	89033	94677.4	105664	96487.7	339623	340152	238662	210557	520244	571515	287834	265867	143335	170250	120332	164023	74811.9	100616	132652	103223	169335	114567
MEDN0115	4	215.447	117.12	197.693	134.922	90.6459	0.966955	0.195398	0.195398	0.195398	0.195398	0.195398	0.195398	895.581	466.183	162.476	314.443	0.966955	72.1404	1881.04	187.983	96.3317	157.867	26.8421	79.7303
MEDN1723	1	1909.5	719.653	0.248247	288.353	0.248247	325.456	285615	123782	111907	67352.2	167061	204328	0.248247	0.248247	0.248247	0.248247	0.248247	0.248247	665791	1.48401e+06	486803	1.07467e+06	111607	207496
MEDN1899	5	7015.4	7353.54	13058.4	7178.8	5442.14	5461.77	16.5962	14.9697	0.00169939	14.7615	16.5693	12.1676	48859	16899.9	5765.52	16859.3	4466.18	5852.36	0.00169939	39.9727	30.3936	27.1018	16.4003	12.4757
MEDN1126	1	1909.5	719.653	0.248247	288.353	0.248247	325.456	285615	123782	111907	67352.2	167061	204328	0.248247	0.248247	0.248247	0.248247	0.248247	0.248247	665791	1.48401e+06	486803	1.07467e+06	111607	207496
MEDN1904	4	12612.1	19730.4	62084.7	26357.8	45992.2	15932.3	8619.89	4915.06	12924.2	2183.93	6011.65	14878.4	98419.5	16548.5	22887.6	59433.6	14640.5	13139.9	60756.6	79633.1	49573.1	30040.5	1517.74	24806
MEDN0113	5	2511.22	2995.86	9776.95	5472.94	6559.56	3412.59	477.925	490.484	810.453	437.78	384.175	877.809	12280.2	2626.6	8108.36	6096.02	2978.59	2984.14	472.271	544.261	596.932	347.361	289.542	413.021
MEDN0107	5	27438.1	22535.4	27578.3	24828.7	21932.6	22946.1	9815.38	10108	9439.79	10803	9546.41	11287.1	21714.5	24392.8	23823.7	21183.7	23039.7	23467.8	9644.65	11218.5	10741.3	10751.5	8240.43	10143.4
MEDN0109	5	37.3635	22.1437	15.3026	4.85078	7.4121	7.24175	0.000955059	0.000955059	0.000955059	0.000955059	0.000955059	0.000955059	40.2577	13.256	8.68475	3.83952	6.096	9.32999	18.0239	14.663	6.70644	5.01129	3.61678	4.79338
MEDN1077	1	1909.5	719.653	0.248247	288.353	0.248247	325.456	285615	123782	111907	67352.2	167061	204328	0.248247	0.248247	0.248247	0.248247	0.248247	0.248247	665791	1.48401e+06	486803	1.07467e+06	111607	207496
MEDN1902	1	1909.5	719.653	0.248247	288.353	0.248247	325.456	285615	123782	111907	67352.2	167061	204328	0.248247	0.248247	0.248247	0.248247	0.248247	0.248247	665791	1.48401e+06	486803	1.07467e+06	111607	207496
MEDP0115	8	10273.7	13407.8	14837	4139.64	10828.4	4708.19	3961.8	11244.1	7865.01	33756.4	7723.12	12996.3	19087.7	85729	123675	91855.6	18206.8	76335.9	1.94191	1.93917	1.94011	1.93917	1.93917	1.96151
MEDP0443	3	12586	18506.7	42204.1	22959.1	33670.9	23529.8	20114.6	63082.1	13795	187683	24016.3	16366.3	11531.9	12737.7	9559.38	18982.2	5257	7850.82	0.67404	0.67404	0.67404	0.67404	0.67404	0.67404
MEDP1999	3	117450	179924	287112	323332	243361	109923	270864	405659	333408	329710	346596	324306	78730.1	129024	49539.4	146799	63971.2	87308.2	190483	89188.5	69298.5	138076	122451	62570.6
MEDN0098	9	4.23609e+06	3.89848e+06	3.65272e+06	3.83345e+06	3.86327e+06	3.86516e+06	3.35188e+06	3.61448e+06	3.21466e+06	3.50652e+06	3.16615e+06	3.55332e+06	3.18669e+06	3.27969e+06	3.47923e+06	3.22057e+06	3.51238e+06	3.08707e+06	3.43664e+06	3.45706e+06	3.36096e+06	3.5179e+06	3.07785e+06	3.03839e+06
MEDP0118	7	5.6936e+06	5.46982e+06	3.90399e+06	1.26873e+06	2.58609e+06	2.60789e+06	4.7594e+06	4.44652e+06	7.85759e+06	1.8311e+06	9.27458e+06	9.99931e+06	3.50379e+06	4.92455e+06	3.0751e+06	4.21697e+06	2.26546e+06	3.2743e+06	3.47795e+06	8.48189e+06	7.01032e+06	7.83248e+06	5.56803e+06	3.48321e+06
MEDP0821	4	162263	238554	338628	176543	366299	147994	70436.7	48591.9	150619	85969.2	127060	111122	639425	4.37777e+06	6.97797e+06	7.16867e+06	2.3199e+06	4.95758e+06	4.28151e+06	5.63767e+06	1.35906e+06	7.5623e+06	6.70458e+06	2.41611e+06
MEDN1484	6	1.96968e+06	3.62223e+06	3.62004e+06	2.28611e+06	3.59975e+06	3.1219e+06	2.70261e+06	2.50526e+06	2.265e+06	2.63556e+06	3.0884e+06	3.17845e+06	3.04067e+06	3.5911e+06	1.70904e+06	1.80553e+06	4.42921e+06	1.13813e+06	2.18422e+06	2.13803e+06	1.94741e+06	2.61752e+06	1.81518e+06	2.11262e+06
MEDP0384	8	53573.2	74606	141227	115576	76103.7	72017.3	232027	382306	368127	230832	337553	299326	285820	434782	629268	458770	281282	239575	245788	326794	372293	407444	291879	306920
MEDP0584	8	85853	59413.2	9.29214	69140.6	53400.6	83924.9	61727.1	114735	140289	48047.6	8.63206	93352.8	112500	157330	196735	74842.6	66108.7	92291.8	28961.9	84283.7	77160.7	92648.3	46132.6	51200.5
MEDP0898	3	1.16612e+06	980504	888812	1.31143e+06	940212	1.33209e+06	4.03651e+06	4.92954e+06	5.07745e+06	1.58569e+06	6.86049e+06	3.89337e+06	4.10336e+06	3.06525e+06	1.88352e+06	2.14674e+06	1.10401e+06	2.99086e+06	645482	953113	737271	856043	704317	771007
MEDN0195	1	118358	161182	174575	239518	252283	97169.2	20013.9	36126.2	400934	943230	26761.6	5120.67	88687.4	261827	273988	167767	112348	205192	234956	467631	398028	514906	115028	359982
MEDP1212	1	586665	648775	598921	542535	540917	651086	607193	665995	677211	665528	669908	695766	685948	684206	691091	508533	540706	646346	715669	696285	709398	709145	706949	624664
MEDP1741	8	2.1009e+06	1.80789e+06	1.67526e+06	1.94008e+06	1.91235e+06	2.26086e+06	2.47596e+06	2.3536e+06	2.20272e+06	1.49548e+06	2.01198e+06	2.31981e+06	2.33568e+06	2.78293e+06	2.99041e+06	2.69708e+06	2.91888e+06	1.58158e+06	2.47969e+06	2.33805e+06	2.53004e+06	2.403e+06	1.9719e+06	2.55132e+06
MEDP1196	2	7.27488e+06	8.00033e+06	8.57199e+06	8.28718e+06	5.54114e+06	8.56953e+06	5.79551e+06	6.02113e+06	5.46384e+06	8.70633e+06	1.01047e+07	6.24739e+06	8.32384e+06	6.6878e+06	7.70073e+06	3.88302e+06	7.13974e+06	4.83443e+06	8.60307e+06	7.8819e+06	5.16555e+06	7.13005e+06	1.28996e+07	5.2163e+06
MEDN1186	1	102529	130206	84096	141518	137583	102172	77257.4	38933.4	37621.2	11483.7	121629	155223	20362.7	53837.9	31121.2	54133.7	22062.4	26662.6	224002	451840	369223	187452	244265	82972.1
MEDP1197	8	411348	780882	869054	303468	573989	253773	137001	220985	418077	989557	445191	498267	730003	4.24864e+06	5.68045e+06	5.36099e+06	1.58938e+06	4.17684e+06	2.52455e+06	2.62632e+06	511889	3.951e+06	1.86605e+06	1.31887e+06
MEDN1171	6	6079.18	5875.49	3491.71	5956.26	4270.69	4868.5	3264.51	1489.39	2337.49	1111.73	4507.79	4737.7	4.16297	4.09994	4.14995	4.08979	4.15236	4.15119	1.09713	1.09713	1.09713	1.09713	1.09713	1.09713
MEDN1125	5	5.78669e+06	5.81439e+06	5.11342e+06	5.23456e+06	5.48851e+06	5.25469e+06	5.15029e+06	5.25334e+06	4.75632e+06	4.6742e+06	5.07101e+06	4.33697e+06	6.6554e+06	6.29169e+06	6.39938e+06	6.74595e+06	5.87186e+06	7.02813e+06	5.60388e+06	4.98641e+06	5.35855e+06	5.22343e+06	4.44373e+06	4.43354e+06
MEDN1658	9	3165.46	22175.9	16596.9	2443.12	2978.99	19906.2	2282.75	986.84	1977.41	1001.18	1080.46	2237.37	7.24606	7.24606	7.24606	7.24606	7.24606	7.24606	1882.45	4564.59	2361.3	3901.99	2316.95	2012.31
MEDP1218	1	770018	878359	669765	931219	1.00491e+06	772002	654825	323666	340793	73461.4	741175	818467	207204	306244	255715	317418	224177	186929	900922	2.51454e+06	2.27955e+06	1.22416e+06	2.12891e+06	562319
MEDN1909	7	277616	340915	304559	299297	337854	353771	343574	322046	382701	357769	339788	391565	388513	331331	313295	335445	354407	311704	329442	339830	332334	323579	387076	319054
MEDP1242	8	661387	579228	691142	427461	516633	431448	999800	1.08046e+06	773368	786416	829744	569806	741480	658323	443739	1.21474e+06	1.15183e+06	1.39482e+06	976098	869173	891341	838570	975890	1.06883e+06
MEDP0101	5	574420	352465	528835	378272	167488	607764	0.926217	0.965006	0.97927	0.924815	0.924799	0.9248	99393.1	532915	1.17722e+06	376727	51358	407544	0.9248	460722	111343	187055	185633	656319
MEDP1803	6	588356	810326	812530	567015	588252	649861	402548	589291	378482	476643	470865	435758	375937	431146	299583	332117	386523	448455	258124	283340	191182	238433	371968	336592
MEDP0244	6	103165	148989	144243	133402	137987	71424.8	151585	86930.1	115636	148751	113428	146909	14.7405	14.7405	14.7405	14.7405	14.7405	14.7405	90728	125719	88593.5	126002	108980	102427
MEDP0143	3	4.6576e+06	3.77911e+06	6.13325e+06	2.28562e+06	4.36701e+06	4.27988e+06	8.05611e+06	9.37413e+06	9.56023e+06	1.19131e+07	1.23251e+07	1.14454e+07	1.29719e+06	1.23807e+06	2.12756e+06	3.61987e+06	2.39012e+06	3.30051e+06	2.26973e+06	4.0691e+06	3.77053e+06	3.13067e+06	2.86286e+06	1.73249e+06
MEDN1055	3	310347	275425	1.00663e+06	364184	588292	243553	682164	621886	413883	993611	1.05186e+06	2.12556e+06	204797	100501	533501	539183	464782	575803	209290	1.00195e+06	381650	262467	718342	501628
MEDP1231	3	12586	18506.7	42204.1	22959.1	33670.9	23529.8	20114.6	63082.1	13795	187683	24016.3	16366.3	11531.9	12737.7	9559.38	18982.2	5257	7850.82	0.67404	0.67404	0.67404	0.67404	0.67404	0.67404
MEDP0242	8	1.00498e+07	1.15042e+07	1.08225e+07	1.31314e+07	9.71745e+06	9.62563e+06	1.54188e+07	1.27094e+07	1.73451e+07	1.91885e+07	1.66686e+07	1.58139e+07	3.74048e+07	3.64172e+07	3.91637e+07	2.8067e+07	2.51138e+07	3.47996e+07	2.41723e+07	1.86184e+07	2.80503e+07	2.40365e+07	3.51176e+07	2.0081e+07
MEDN0244	3	2.4669e+07	3.20258e+07	5.50586e+07	2.42613e+07	3.26613e+07	1.72252e+07	4.2219e+07	4.17404e+07	4.83904e+07	2.40287e+07	6.45335e+07	6.1808e+07	9.38377e+06	1.00507e+07	1.14015e+07	9.0541e+06	3.47903e+06	6.46787e+06	7.8818e+06	6.17657e+06	1.04992e+07	5.50809e+06	6.75685e+06	6.05873e+06
MEDP0389	3	2.12715e+08	2.28711e+08	2.20124e+08	2.36568e+08	2.31366e+08	2.34002e+08	2.53161e+08	2.49603e+08	2.31808e+08	2.01315e+08	2.47226e+08	2.52323e+08	2.34214e+08	2.22738e+08	2.51419e+08	2.32674e+08	2.29696e+08	221275585	1.97553e+08	2.17795e+08	2.23717e+08	6.72536e+07	2.6838e+08	2.09475e+08
MEDN0245	3	4.10987e+07	3.90894e+07	6.87687e+07	3.78453e+07	5.26319e+07	3.63354e+07	7.28088e+07	8.09205e+07	5.68423e+07	7.54933e+07	7.61438e+07	9.22339e+07	3.70845e+07	2.76441e+07	5.71216e+07	5.75136e+07	5.79289e+07	50207451	3.9995e+07	6.02928e+07	5.3715e+07	2.9615e+07	5.09651e+07	6.56899e+07
MEDP1468	1	154660	128780	244070	1.05963e+06	1.03079e+06	405879	148651	622721	289696	2.8426e+06	925961	399767	269150	293618	586016	835984	1.30795e+06	272909	7.48305e+06	1.33605e+06	126506	128763	78924.4	152676
MEDP0393	1	4062.64	6061.01	6080.5	5218.35	2311.54	5037.05	0.887896	0.887896	0.887896	0.887896	0.887896	0.887896	3.18343	5308.19	4749.93	1924.4	6115.88	4876.25	12874.5	39972.9	26716.2	65134.7	29253.2	16900.2
MEDP0250	7	5.35682e+07	5.04187e+07	6.46204e+07	4.41435e+07	5.72193e+07	5.50252e+07	1.51657e+08	1.39508e+08	1.03316e+08	1.25856e+08	1.74603e+08	1.06916e+08	7.20824e+07	4.97912e+07	7.99472e+07	6.48852e+07	1.04215e+08	6.17725e+07	8.35613e+07	1.37879e+08	8.08333e+07	9.16974e+07	1.28718e+08	6.83139e+07
MEDP0514	3	868411	816039	1.07933e+06	338548	446287	1.77912e+06	1.51531e+06	1.17888e+06	658989	372531	1.299e+06	1.51919e+06	723310	423740	746160	1.53664e+06	555759	776666	226215	280041	244314	234687	770973	172643
MEDP0251	8	25845.4	4.76602	33105.2	29405.9	22287.8	4.898	41517.5	64379.8	44391.2	38808.3	13949.5	35195.1	379199	253194	336913	80367.5	71331.5	192842	24674	164537	53168.5	106230	102067	229669
MEDP1654	8	34429	32365.1	23008.9	23106.1	34913.6	30252.8	57024.2	47359.5	57035	53286.2	62770.6	56548.7	93336.8	310446	382136	378027	46265.7	429662	52038.7	503372	170358	130297	64246.7	266999
MEDP1162	3	1.50917e+06	1.74717e+06	1.14775e+06	1.36878e+06	1.43699e+06	859364	2.18921e+07	2.00485e+07	1.92856e+07	2.37517e+07	2.84581e+07	1.79923e+07	9.83549e+06	6.6714e+06	1.04264e+07	1.35419e+07	7.62044e+06	1.36495e+07	6.28123e+06	6.74759e+06	9.69123e+06	6.0747e+06	4.23033e+06	9.25049e+06
MEDP2421	4	3.26714e+06	4.48646e+06	4.39896e+06	2.0995e+06	3.54032e+06	3.47468e+06	1.30877e+07	9.63303e+06	1.03242e+07	7.17132e+06	1.46969e+07	3.55131e+06	2.99284e+07	3.05515e+07	5.18264e+07	5.45413e+07	2.37664e+07	4.12524e+07	4.43628e+07	6.39795e+07	5.63452e+07	6.22056e+07	4.70334e+07	5.12846e+07
MEDP1713	4	34269.9	25679.6	35657.7	14352.8	54090.9	23673.6	1.03469e+06	651902	663575	458384	1.10213e+06	298817	881292	761194	2.1683e+06	2.08177e+06	673793	1.83332e+06	1.48277e+06	3.33498e+06	2.07947e+06	2.09736e+06	1.5744e+06	2.51163e+06
MEDP0148	4	40336.6	22427.8	23111.4	5944.35	19589.2	35568.8	44264.7	36920	40913.1	29879.4	36402.5	33990.5	91268.2	105887	173145	178691	84455.5	168688	166454	198095	230632	256760	156826	209790
MEDN1677	4	265056	260662	236468	657073	277864	110449	39922.9	42704.5	196947	685906	54762	11364	2.0839e+06	3.6169e+06	3.6744e+06	2.98987e+06	2.77185e+06	4.48004e+06	1.16772e+06	4.61292e+06	3.80826e+06	2.52015e+06	1.49031e+06	5.03013e+06
MEDN1711	4	675.45	5756.38	3849.11	6395.95	2885.65	1271.37	1862.14	1731.69	2361.46	6579.89	2255.42	7.19412	45097.7	46624.6	214457	103544	157251	154606	76907.2	54928.4	17514.9	48185.9	40278.1	278537
MEDP1950	4	9.73644e+07	9.75993e+07	106606120	5.4174e+07	1.4701e+08	1.12255e+08	8.7982e+07	1.64059e+08	1.77537e+08	1.32725e+08	1.18651e+08	7.33395e+07	5.26836e+07	2.06311e+08	2.18559e+08	1.4166e+08	7.34145e+07	1.67042e+08	2.27001e+08	1.45238e+08	1.12135e+08	1.83933e+08	1.07022e+08	1.47881e+08
MEDN0141	3	10917	4823.53	19737	20701.3	11409.6	5838.07	17199.4	29002.6	63092.6	12763.5	39219.2	28571.3	6584.91	35692.8	49208.9	35613.4	6048.46	13292.6	8618.74	3600.66	3336.48	13559.6	5904.99	9815.6
MEDP1719	4	158994	185370	181983	93905.3	162727	168480	464672	374699	418326	248112	529362	154597	984935	1.02289e+06	1.78038e+06	1.78553e+06	803008	1.48004e+06	1.22211e+06	1.89481e+06	1.54824e+06	2.1445e+06	1.46621e+06	1.65762e+06
MEDP1077	4	1.08449e+06	1.39253e+06	1.12665e+06	1.43708e+06	936905	528414	1.54148e+06	1.01144e+06	1.85207e+06	3.81042e+06	2.2188e+06	1.30798e+06	1.92592e+08	2.28635e+08	2.46049e+08	1.78298e+08	6.31991e+07	266547037	1.06761e+08	489543579	5.36605e+08	2.96201e+08	1.82892e+08	5.72014e+08
MEDN1501	6	42250.6	48083.4	56552.7	10635.3	12101.7	13978.4	29395.6	21013.1	40902.8	29903.9	42829.4	32556.9	8.3306	8.3306	8.3306	8.3306	8.3306	8.3306	7.12808	7.1208	7.12084	7.12084	7.12084	7.12084
MEDN0431	4	14182.8	11911.6	11738.8	9370.79	14782.7	10266.2	335733	242128	262318	55040.4	379698	59847	456227	407126	1.0841e+06	1.39157e+06	391913	1.38608e+06	931252	1.53057e+06	970426	908673	873449	1.0637e+06
MEDP1100	5	44873.9	36443.2	68625.6	31734.1	13467	50842.2	2685.34	1214.8	1628.98	2424.71	966.393	4208.82	39009.2	143965	192741	65672.6	13033.3	96110.6	4118.92	2669.81	3037.97	3316.64	3794.07	6827.12
MEDP1956	1	455539	733442	471880	218723	722607	547575	2.04435e+06	3.13573e+06	6.13931e+06	1.94429e+06	4.19236e+06	3.02097e+06	191058	2.14053e+06	5.43907e+06	1.1551e+06	676795	1.84524e+06	764228	5.50869e+06	1.20886e+06	1.94414e+07	1.5865e+06	2.03455e+06
MEDN1675	3	110548	148603	148180	116423	135449	151732	298539	183577	380461	184291	250376	271749	85288.8	147745	161037	142023	306728	98042.5	115110	116939	122995	106837	151569	130411
MEDP0151	8	296180	504910	710450	246402	389653	286510	326232	544592	716852	914860	1.15903e+06	924605	411378	1.63795e+06	1.50118e+06	747641	368640	1.35348e+06	393955	902956	794493	810361	565766	919341
MEDN0143	4	265056	260662	236468	657073	277864	110449	39922.9	42704.5	196947	685906	54762	11364	2.0839e+06	3.6169e+06	3.6744e+06	2.98987e+06	2.77185e+06	4.48004e+06	1.16772e+06	4.61292e+06	3.80826e+06	2.52015e+06	1.49031e+06	5.03013e+06
MEDN0624	4	15749.6	13798.8	6472.07	17058.1	11697.3	8241.17	64932.2	24015.1	84541.9	694592	39669.9	12.2522	3.09507e+06	4.55849e+06	5.865e+06	5.83347e+06	2.87513e+06	7.13573e+06	4.45903e+06	1.26847e+07	6.25448e+06	9.26326e+06	6.40794e+06	8.05503e+06
MEDP0401	8	148709	116888	158959	171245	137960	168117	306259	261100	296142	440270	372273	274271	1.95374e+06	1.92472e+06	3.01228e+06	1.16432e+06	977736	1.18186e+06	179062	341582	244928	648645	400640	233530
MEDP1202	1	79897.4	159495	82985.5	45281	134621	117807	330153	474822	988882	213093	673433	488542	30141.5	366227	1.01673e+06	204465	105436	329414	70232.2	862680	132715	2.87439e+06	246436	235163
MEDP2540	6	408218	337915	306433	327826	258044	287973	394416	427467	310894	374747	300057	381917	286335	218655	188384	207084	219504	215772	334638	266352	232324	278591	285748	274324
MEDN1513	8	92684.2	66074.6	105959	35813.8	106674	8.69742	13334.1	13520.1	49309.5	57701.1	20171.5	23272.1	69655.1	247289	414297	231170	68920.5	228407	145663	123051	22281.9	113336	129092	39717.8
MEDP0526	7	4.09067e+06	4.24914e+06	4.17595e+06	3.92241e+06	4.21933e+06	4.07791e+06	5.44299e+06	5.99315e+06	5.90634e+06	6.10355e+06	5.82662e+06	4.84315e+06	3.55372e+06	3.61719e+06	3.48363e+06	3.28523e+06	3.37618e+06	3.48764e+06	5.5102e+06	5.75171e+06	5.90035e+06	5.85905e+06	4.87885e+06	5.38052e+06
MEDP1073	3	1.50917e+06	1.74717e+06	1.14775e+06	1.36878e+06	1.43699e+06	859364	2.18921e+07	2.00485e+07	1.92856e+07	2.37517e+07	2.84581e+07	1.79923e+07	9.83549e+06	6.6714e+06	1.04264e+07	1.35419e+07	7.62044e+06	1.36495e+07	6.28123e+06	6.74759e+06	9.69123e+06	6.0747e+06	4.23033e+06	9.25049e+06
MEDP2511	6	654855	789139	391393	473836	595474	397823	27284.6	21543.5	13004	2.86115e+06	25963.3	2.25496e+06	4.84566	4.84566	4.84566	4.84566	4.84566	4.84566	69237.1	49760.4	81699.3	65602.3	149491	37075
MEDP1960	3	7.03375e+06	5.17152e+06	5.44646e+06	6.3489e+06	5.38884e+06	6.00445e+06	9.71208e+06	1.05492e+07	8.00565e+06	9.12288e+06	9.29131e+06	1.06968e+07	7.07232e+06	3.57772e+06	4.2233e+06	2.25813e+06	2.15245e+06	6.54625e+06	5.24395e+06	5.09801e+06	4.17338e+06	4.00948e+06	9.3459e+06	2.65308e+06
MEDN1012	8	21.7465	21.7465	21.7465	21.7465	21.7465	21.7465	56368.4	67948.6	48820.1	75580.8	73814.6	56480.2	86170.9	39775.8	69416.3	94540.2	54842.5	86166.9	28895.9	23981.4	48261.6	21307.7	28408.9	38626.6
MEDP1072	4	3.26714e+06	4.48646e+06	4.39896e+06	2.0995e+06	3.54032e+06	3.47468e+06	1.30877e+07	9.63303e+06	1.03242e+07	7.17132e+06	1.46969e+07	3.55131e+06	2.99284e+07	3.05515e+07	5.18264e+07	5.45413e+07	2.37664e+07	4.12524e+07	4.43628e+07	6.39795e+07	5.63452e+07	6.22056e+07	4.70334e+07	5.12846e+07
MEDP0157	4	65649.6	87301	66663.3	39058.4	48696.7	41941.9	192763	153619	164817	122658	188452	75165.8	468076	403906	684987	696537	308774	529509	541834	804845	657662	884978	517721	724929
MEDP1498	8	6861.44	17574.4	22508.5	5194.12	15021.5	4060.45	3782.23	11196.6	15846.4	22513.8	15729	17360.5	10625.9	91733.6	130155	91998.4	39378.3	72885	2.4239	2.4239	2.4239	2.4239	2.4239	2.4239
MEDN0433	3	258012	300271	143477	149012	200714	142205	11424.9	15958.7	6845.62	1.31174e+06	7736.18	1.23937e+06	7.01373	7.02648	7.01373	7.01373	7.01373	7.01373	30218.4	21815.2	40547.3	33500.9	32412.5	26248
MEDP0158	6	2.16821e+06	3.62254e+06	2.3814e+06	1.44805e+06	2.99504e+06	1.85363e+06	82502.3	85593.1	120188	7.37631e+06	77900.8	7.54554e+06	50393.5	29189.8	49071.7	71975.7	31980.2	60770	451102	381244	468645	575602	330936	393260
MEDN0537	4	2161.74	3362.87	1682.15	3842.45	3.00599	3850.31	1384.82	2373.05	2373.64	2303.59	2303.59	2691.53	327005	53954.7	39143	51052.3	67112	130006	167906	145289	361990	279403	322771	149260
MEDP0159	8	167714	92742.4	164167	113760	79548.6	209472	43098	39128.5	39128.5	4.8809	50470.6	27218.4	2.23547e+06	2.78823e+06	3.44028e+06	3.79554e+06	1.66432e+06	3.60162e+06	289141	1.95884e+06	1.23755e+06	871926	715084	1.14645e+06
MEDP0160	1	7.16593e+06	1.25956e+07	6.69367e+06	2.96148e+06	1.13817e+07	9.54336e+06	4.06657e+07	6.01693e+07	1.17172e+08	2.36476e+07	8.66396e+07	5.90981e+07	1.96388e+06	3.10579e+07	8.43447e+07	1.57571e+07	9.02314e+06	2.58701e+07	9.13313e+06	107821365	1.38827e+07	3.53939e+08	3.03216e+07	2.85528e+07
MEDN0152	4	7297.54	12174.6	5984.28	9221.48	11334.9	4865.84	31886	19833.9	48592.3	242629	14785.2	12435.5	4.56548e+06	7.10942e+06	8.48837e+06	9.39599e+06	4.8566e+06	9.83942e+06	6.81461e+06	1.93789e+07	8.90592e+06	1.4502e+07	1.09149e+07	1.22965e+07
MEDN0153	4	9.02256	9.02256	9.02256	9.02256	9.02256	9.02256	8.4696	8.4696	8.4696	8.4696	8.4696	8.4696	6.54374e+06	8.98318e+06	9.02282e+06	9.93354e+06	4.32996e+06	9.92963e+06	4.06689e+06	1.27161e+07	1.43981e+07	8.81808e+06	7.21669e+06	1.64552e+07
MEDN1332	4	3.57546	2024.6	3819.94	3473.34	2084.84	3.57546	2886.19	915.001	713.069	1982	5467.36	8.54015	52843	44836.6	54930.4	75180.4	75888.6	76552.5	44770.3	72602	31866.7	68377.3	47841.6	33473.7
MEDP1093	4	800971	1.42464e+06	1.63677e+06	1.17738e+06	2.06642e+06	965201	3.75351	3.75351	3.75351	3.75351	3.75351	3.75351	2.6861e+06	2.32982e+07	3.55923e+07	3.48897e+07	1.27659e+07	2.52264e+07	1.97674e+07	2.97678e+07	6.67467e+06	3.34205e+07	3.40578e+07	1.36537e+07
MEDN1236	4	5.79227	5.79227	5.79227	5.79227	5.79227	5.79227	17487.1	9.64301	15433.7	7197.76	20634.8	10318.1	199471	342036	546752	477851	369489	441385	819716	1.64557e+06	897546	821885	50150.8	1.17882e+06
MEDN0421	8	3.39393e+06	1.33422e+07	1.70025e+07	5.3616e+06	7.13471e+06	2.76772e+06	1.64359e+07	1.872e+07	4.84141e+07	8.1608e+07	1.75774e+07	2.0171e+07	2.59874e+07	3.79349e+07	6.90553e+07	4.18839e+07	4.66256e+07	5.48509e+07	2.96219e+07	4.25666e+06	3.38732e+07	2.82631e+07	251884	4.23725e+07
MEDN1529	3	7.03203e+06	1.1062e+07	8.79977e+06	1.44729e+07	1.30816e+07	5.18948e+06	4.4342e+06	6.24204e+06	2.38591e+07	5.48531e+07	9.88871e+06	6.4781e+06	156046	584771	125646	181028	459634	285167	1.01013e+07	2.97988e+06	4.81867e+06	8.52032e+06	6.07406e+06	5.93081e+06
MEDN1612	5	35043.8	26407.1	42473.4	14435.6	17852.3	31576.9	2.88667	2.88667	2.88667	2.88667	2.88667	2.88667	44094.1	52489.9	117650	85475.2	38842.5	100807	31542.9	27513.8	34611.1	25729.3	16264	30757.7
MEDP0165	6	972678	1.1009e+06	1.37631e+06	1.3965e+06	1.08208e+06	449055	291384	610719	1.59165e+06	1.50361e+06	954178	556150	283384	775015	138647	464577	277271	131082	596864	292928	403632	341052	436605	684847
MEDN0602	4	8.20791	8.20791	8.20791	8.20791	8.20791	8.20791	73556	51128.5	9.6114	9.6114	113571	77391.5	2.65946e+07	3.62144e+07	4.6051e+07	4.76434e+07	2.22442e+07	5.38102e+07	2.36904e+07	7.2723e+07	7.14893e+07	5.27296e+07	4.12119e+07	7.30484e+07
MEDN0534	4	7297.54	12174.6	5984.28	9221.48	11334.9	4865.84	31886	19833.9	48592.3	242629	14785.2	12435.5	4.56548e+06	7.10942e+06	8.48837e+06	9.39599e+06	4.8566e+06	9.83942e+06	6.81461e+06	1.93789e+07	8.90592e+06	1.4502e+07	1.09149e+07	1.22965e+07
MEDN0573	4	11179.9	2434.75	2029.77	3444.74	6.27247	2297.3	14626.3	3546.03	15899.6	6005.3	9405.87	4808.2	2.41968e+07	3.03923e+07	2.46454e+07	2.86582e+07	2.26628e+07	2.90612e+07	3.35314e+07	2.29482e+07	1.70738e+07	2.06151e+07	2.58814e+07	2.26047e+07
MEDP1276	8	296180	504910	710450	246402	389653	286510	326232	544592	716852	914860	1.15903e+06	924605	411378	1.63795e+06	1.50118e+06	747641	368640	1.35348e+06	393955	902956	794493	810361	565766	919341
MEDP0167	4	425373	873319	1.05334e+06	345274	664787	311767	106522	267640	602332	1.34774e+06	513266	520718	348041	5.864e+06	7.24621e+06	6.21554e+06	1.62421e+06	4.8823e+06	3.33312e+06	4.51764e+06	420092	7.47814e+06	2.75205e+06	1.58521e+06
MEDN0161	8	2.82951	2.82951	2.82951	2.82951	2.82951	2.82951	22577	7.43234	13097	8970.61	16821.6	12864.6	359774	279311	72045.9	64898.2	93093.7	101858	52943.7	115617	19619.3	157713	125052	25352
MEDN1544	4	9.54393	9.54393	9.54393	9.54393	9.54393	9.54393	11433.3	7713.83	3090.25	16761.7	8.75055	5119.24	762840	1.14725e+06	806067	927177	565479	935380	872239	1.05381e+06	534056	600848	1.04903e+06	1.14392e+06
MEDN1545	4	8.06273	8.06273	8.06273	8.06273	8.06273	8.06273	5.34804	53122	69755	203952	5.34804	41643	3.44446e+06	3.23969e+06	2.52547e+06	1.52111e+06	921571	3.27485e+06	1.19094e+06	2.28943e+06	5.97109e+06	792921	1.12303e+06	5.34804
MEDN1003	4	721965	1.36463e+06	1.56125e+06	1.00544e+06	1.98692e+06	745935	129742	199995	200018	177546	266227	242011	2.97483e+06	2.60843e+07	3.84049e+07	4.22957e+07	1.42189e+07	2.98676e+07	2.30661e+07	2.86442e+07	5.5749e+06	3.59466e+07	3.85922e+07	1.2784e+07
MEDN2061	3	465263	320810	241429	228304	329521	444287	687613	801311	577134	846498	1.00367e+06	410688	9345.86	21812.3	12186.9	48582.3	19276.5	24654.4	57819.6	159709	108219	224659	77594.3	101100
MEDP1501	3	691737	641776	801895	967714	732956	346890	701158	1.59537e+06	1.95482e+06	1.27327e+06	1.58614e+06	1.10554e+06	580997	1.87825e+06	1.78007e+06	643372	281813	760758	822766	589105	497505	721106	819448	769566
MEDP1787	3	104811	92763.1	117845	80050.3	90495.3	38207.7	151441	242153	238827	167663	217225	257644	40395.4	277683	298317	198342	86727.6	329097	83003.1	107312	113659	169414	47591.3	83428.1
MEDP1954	4	106445	68728.8	79937.2	45606.8	45251.7	78489.4	2.6548e+06	1.95409e+06	2.29288e+06	368375	3.13111e+06	333100	3.2e+06	2.35031e+06	7.20438e+06	8.26815e+06	2.55084e+06	8.25123e+06	6.26505e+06	1.25585e+07	8.58719e+06	7.87637e+06	6.82295e+06	8.46854e+06
MEDP1991	4	10587.6	12472.8	14134.4	7125.61	5170.33	8078.52	17612.1	18386.6	18288.3	39507	36926.3	25605.4	95368.2	218572	244095	312138	31239.2	376181	70582	848243	274036	184847	88089.9	242459
MEDP0378	3	5.61132e+06	4.16105e+06	2.95566e+06	3.52349e+06	3.15268e+06	5.11063e+06	1.37827e+07	1.44834e+07	1.89673e+07	8.62255e+06	1.54176e+07	1.94111e+07	6.92261e+06	9.08822e+06	8.01987e+06	5.55271e+06	9.51108e+06	7.15212e+06	3.73276e+06	4.65297e+06	5.19755e+06	7.41231e+06	5.91751e+06	3.52738e+06
MEDP1493	8	34429	32365.1	23008.9	23106.1	34913.6	30252.8	57024.2	47359.5	57035	53286.2	62770.6	56548.7	93336.8	310446	382136	378027	46265.7	429662	52038.7	503372	170358	130297	64246.7	266999
MEDP1791	3	791420	1.76857e+06	487074	1.23375e+06	913412	4.60026e+06	2.68278e+06	2.69552e+06	2.262e+06	3.30748e+06	1.97228e+06	2.93318e+06	223277	279189	264107	222799	131154	167459	228650	170030	129367	385473	394520	76926.6
MEDP1083	8	6861.44	17574.4	22508.5	5194.12	15021.5	4060.45	3782.23	11196.6	15846.4	22513.8	15729	17360.5	10625.9	91733.6	130155	91998.4	39378.3	72885	2.4239	2.4239	2.4239	2.4239	2.4239	2.4239
MEDP0881	6	2.023e+07	2.23423e+07	1.47272e+07	2.32462e+07	2.24104e+07	2.30164e+07	1.59734e+07	1.71582e+07	1.78872e+07	1.96015e+07	2.26015e+07	1.57444e+07	2.30955e+07	3.50255e+06	6.64527e+06	2.47711e+07	2.42799e+07	1.10729e+07	1.54684e+07	1.71939e+07	1.66308e+07	1.76788e+07	1.88431e+07	1.65539e+07
MEDP0174	9	1.01154e+06	887780	1.04278e+06	986547	940393	959964	570207	621893	659122	684986	653422	493124	807474	911368	1.06728e+06	816681	844153	828726	584399	710672	659487	636722	619832	796351
MEDP1961	1	74742.9	181884	121704	135941	192982	142944	285119	350982	345784	296829	292697	325165	242405	236501	259592	271558	115866	358836	160345	458588	408300	491892	332690	276768
MEDN1586	4	0.456535	0.456535	0.456535	0.456535	0.456535	0.456535	0.165068	0.165068	0.165068	0.165068	0.165068	0.165068	4956.18	10532.1	1632.6	4283.44	0.456535	15078.9	0.165068	8338.27	17671.5	49.6511	76.6587	26038.8
MEDP0178	8	517490	1.07907e+06	1.82136e+06	571709	1.15253e+06	382012	266197	575324	1.04263e+06	1.50219e+06	544782	536807	765378	2.82341e+06	4.44259e+06	3.40577e+06	1.09302e+06	2.2832e+06	2.1065e+06	2.02241e+06	468607	1.93921e+06	2.63794e+06	588652
MEDN1591	3	238935	418560	724890	382539	452317	219197	661594	598254	993956	404073	981581	958821	117039	106147	214211	129233	71957.7	109772	114771	89851.6	164147	70166.1	101995	87702
MEDN0171	8	118698	230900	355176	111604	250014	87073.7	58591.1	83042.5	208406	279590	108498	109073	183821	807032	1.55505e+06	1.25707e+06	296609	800499	681559	480606	90082.7	504543	716382	168298
MEDN0419	4	131874	114057	265947	103271	207835	67712.5	25170.4	22344.8	62946.7	222137	35749.7	32002.5	5.97845e+06	6.77762e+06	2.95491e+06	3.79549e+06	2.19436e+06	9.50839e+06	849044	3.5143e+06	1.76063e+07	676790	1.3925e+06	1.34422e+07
MEDN0170	4	3.4729	3.4729	3.4729	3.4729	3.4729	3.4729	100315	63843.7	12.9949	62018.5	19747.8	33717.4	1.25762e+07	9.36807e+06	9.5895e+06	7.24717e+06	6.12047e+06	8.02585e+06	7.9623e+06	1.67673e+07	1.90362e+07	8.43776e+06	8.34016e+06	8.58733e+06
MEDN1117	4	3767.45	6391.75	11486.6	1493	2014.13	2673.17	10878	5432.94	16510.6	9.70995	12256.5	9.71246	3.26443e+07	2.91655e+07	31075338	1.88257e+07	1.21495e+07	3.01534e+07	1.9883e+07	3.76708e+07	4.48675e+07	1.61361e+07	2.48448e+07	5.00573e+07
MEDN0533	8	20949.8	16891.3	28279.4	21223.4	18514.9	7182.64	18381.5	13436.6	17800.4	31721.7	22058.2	30436.6	259211	1.53129e+06	4.39211e+06	1.15199e+06	140225	753661	531335	968708	477850	788029	748846	559141
MEDP0383	6	664553	719909	726806	722134	818764	625668	561638	578118	796470	728023	951564	607324	206303	153239	287805	754121	748174	356377	510508	672323	658570	778865	733168	598049
MEDN0279	2	86744.3	48277.4	199001	31910.1	67075.9	65466.8	1922.6	4657.83	39512.6	68104.2	4020.22	5243.74	13091.4	26401.3	42398.6	24798.7	4093.05	75221.2	60722.7	104903	112054	133042	65936.9	229698
MEDN1554	4	356220	867224	385451	1.97381e+06	981012	2.69001e+06	454536	1.06659e+06	782334	975790	611753	564501	640974	2.69304e+06	3.73289e+06	2.9941e+06	1.05196e+06	1.20418e+06	1.7513e+06	3.34384e+06	2.65432e+06	3.34383e+06	2.89039e+06	2.37408e+06
MEDN0741	6	5.56821e+06	6.18985e+06	5.43474e+06	5.25484e+06	6.10495e+06	5.09448e+06	5.37072e+06	5.85589e+06	5.52906e+06	5.85646e+06	4.70662e+06	4.7195e+06	3.90303e+06	3.47567e+06	5.49137e+06	4.38114e+06	4.46363e+06	4.76449e+06	6.27916e+06	5.70751e+06	5.68819e+06	5.7365e+06	4.14971e+06	5.95913e+06
MEDP1272	9	1.08516e+07	1.13753e+07	5.78088e+06	1.03249e+07	1.21363e+07	1.242e+07	524118	590155	695804	217943	1.51103e+06	1.32606e+06	4.85063e+06	3.88295e+06	2.00881e+06	1.27627e+06	1.18534e+06	717682	379512	663133	665501	1.07346e+06	1.29285e+06	304705
MEDN0611	9	16571.2	27643.6	16676.7	11302	19100.4	17037.8	16749.6	14124.4	15301.6	13768.3	15066.3	13108.4	12805.6	14935.6	11900.7	15658.3	12427.3	18026.8	14375.9	14456.6	16157.7	13885	13066.7	12838.9
MEDN0824	9	16238.6	10804.6	36075.2	2684.25	3991.15	12939.9	5388.56	1169.13	1756.99	4013.02	5082.02	1978.06	8313.66	1667.94	1323.82	6995.27	6.36492	6.36492	4615.56	3815.77	752.292	2746.52	297.153	2100.94
MEDP2059	7	3.04124e+06	3.01389e+06	3.04404e+06	2.93848e+06	3.00475e+06	2.97685e+06	3.20999e+06	3.63339e+06	3.61022e+06	3.54988e+06	3.56024e+06	3.0525e+06	2.68954e+06	2.8418e+06	2.8835e+06	2.69102e+06	2.7193e+06	2.80295e+06	3.61862e+06	3.51922e+06	3.7104e+06	3.69321e+06	3.11929e+06	3.56995e+06
MEDN1613	3	525509	177315	351891	229566	227107	611722	448490	1.04446e+06	452861	340196	254980	227193	305279	180675	351280	431310	210987	222435	199152	489926	345552	294728	259481	416195
MEDP1477	6	280790	354707	354840	237042	311056	263953	218928	394574	135314	244706	247041	373236	150482	159079	169298	277409	147943	178827	212728	150272	225188	250685	218939	164695
MEDP2265	4	2.02839e+06	2.09584e+06	1.67243e+06	1.36625e+06	616522	1.98118e+06	9.91571	9.91571	9.91571	9.91571	9.91571	9.91571	736441	4.33845e+06	6.84314e+06	3.99114e+06	107597	3.31795e+06	7.38259e+06	9.93719e+06	7.26155e+06	3.33791e+06	1.43144e+06	1.11575e+07
MEDN1239	4	222055	265630	265011	378394	340424	79178.9	2.9101	2.9101	2.9101	2.9101	2.9101	2.9101	1.87165e+07	2.01429e+07	8.7877e+06	1.35294e+07	6.27348e+06	3.62012e+07	1.55183e+06	9.03193e+06	3.56083e+07	1.23018e+06	2.77691e+06	7.53459e+07
MEDN1638	4	5322.83	7446.04	14922.9	9046.9	10642.5	9586.9	11.018	11.018	11.018	11.018	11.018	11.018	91530.1	61176	82473.6	47337.7	37773.6	64896.1	43467	53983.5	47366.3	43348.2	27551.9	51708.3
MEDP2266	2	1.21119e+06	1.25824e+06	1.32191e+06	1.24499e+06	1.21419e+06	1.22124e+06	1.13974e+06	1.24071e+06	1.2124e+06	1.19358e+06	1.17861e+06	1.20187e+06	1.14383e+06	1.10662e+06	1.13248e+06	1.1158e+06	1.15719e+06	1.15134e+06	1.07785e+06	1.24065e+06	1.22112e+06	1.21846e+06	1.28473e+06	1.31211e+06
MEDN1005	3	4.12439e+06	3.80214e+06	3.78203e+06	3.49611e+06	3.72047e+06	4.24126e+06	1.78674e+07	1.44564e+07	1.42659e+07	6.72081e+06	1.97658e+07	2.89638e+07	4.89919e+06	4.56031e+06	4.6262e+06	9.39309e+06	8.90736e+06	6.66628e+06	1.10339e+07	6.55912e+06	5.87396e+06	6.92948e+06	6.80518e+06	4.95524e+06
MEDN0461	5	114089	201555	95952.6	168020	147138	95947	57475.3	54394.1	50624.3	100800	75344	51297.1	112998	187660	180455	125844	10.4692	146056	104241	45292.4	79872.3	32320.6	67246.1	26375.6
MEDN0506	6	35584042	4.97499e+07	4.70223e+07	4.47042e+07	5.20838e+07	3.46157e+07	2.72923e+07	4.977e+07	6.85604e+07	8.58769e+07	3.27875e+07	1.87303e+07	1.40621e+07	1.27828e+07	2.7106e+07	1.48728e+07	2.01669e+07	7.60544e+06	1.93133e+07	3.70934e+06	2.70092e+06	8.12347e+06	2.92452e+07	3.2784e+06
MEDN1576	3	1.49343e+07	2.17411e+07	1.65532e+07	9.74285e+06	1.57695e+07	1.86669e+07	3.90909e+07	4.87374e+07	4.3878e+07	149281322	8.47136e+07	4.74257e+07	5.11517e+06	2.58435e+07	3.58107e+07	1.93508e+07	6.47312e+06	2.64425e+07	3.53673e+06	1.35714e+07	5.85379e+06	1.06192e+07	9.70443e+06	1.02547e+07
MEDN0352	6	5.15481e+06	3.1572e+06	7.72646e+06	4.77678e+06	7.39478e+06	6.81469e+06	5.73808e+06	2.50853e+06	8.71276e+06	7.46656e+06	3.40333e+06	2.31507e+06	3.05934e+06	2.66292e+06	3.87923e+06	4.66515e+06	3.20716e+06	3.64803e+06	3.40468e+06	4.37009e+06	3.61101e+06	3.72058e+06	2.2104e+06	3.30936e+06
MEDP0039	2	1.71937e+07	1.50892e+07	3.01253e+07	1.51661e+07	1.6002e+07	2.33287e+07	7.658e+06	2.41794e+07	6.52353e+06	2.93477e+07	2.16969e+07	2.03361e+07	1.63759e+07	2.07023e+07	2.85152e+07	9.44263e+06	1.83272e+07	1.46075e+07	2.76845e+07	2.19801e+07	3.81228e+06	1.42531e+07	3.1922e+07	2.65132e+07
MEDP1988	4	304157	139981	244284	136342	66487.4	209480	25943	27497.5	43844.7	24315.3	32720.6	32876.5	113388	387846	758137	267555	108015	299677	52878.7	477670	129208	132985	136118	502598
MEDP1076	8	2.43202e+06	1.80678e+06	2.46974e+06	2.44049e+06	2.04443e+06	1.74338e+06	2.445e+06	2.50925e+06	2.30797e+06	1.8423e+06	3.79097e+06	2.43638e+06	2.37003e+06	2.85643e+06	2.19396e+06	2.16411e+06	4.14641e+06	1.99921e+06	2.59658e+06	2.72218e+06	2.03699e+06	2.93542e+06	2.4745e+06	3.0177e+06
MEDP2143	7	120944	128600	109766	106405	160482	134958	133514	151340	176412	165781	143960	128432	113899	117084	139756	146600	102802	125150	149920	148269	147639	137750	137258	149901
MEDP2241	4	803781	1.14082e+06	1.74316e+06	1.52784e+06	1.68247e+06	1.14221e+06	1.2246e+06	1.47367e+06	1.16485e+06	1.69922e+06	1.4123e+06	1.16859e+06	1.51023e+06	833382	1.60987e+06	1.54744e+06	1.63121e+06	1.44349e+06	1.35722e+06	1.43126e+06	1.50101e+06	1.48939e+06	1.42679e+06	1.44178e+06
MEDP0871	1	1.07152e+06	1.0021e+06	1.0373e+06	1.09209e+06	1.02941e+06	1.06923e+06	1.18386e+06	1.03008e+06	1.74794e+06	673736	2.26342e+06	1.5217e+06	1.05782e+06	1.04106e+06	999607	867385	976391	915966	1.89427e+06	2.95034e+06	2.8845e+06	2.71935e+06	4.58501e+06	1.89459e+06
MEDN0372	9	91643.8	88899.3	74762	100472	110099	111313	7787.15	8614.12	9372.94	5136.39	11544.1	18338	48154.6	38827.7	18462	21904.9	16398	10410.4	1.05262	1.05262	1.05262	1.05262	1.05262	1.05276
MEDN1600	9	145299	170437	124064	164990	145400	201439	1.69503	35741.2	32646.7	1.69503	22421.3	38985.5	64767	62743.6	34300.2	41578.2	21267.4	23715.2	1.69503	1.69503	1.69503	1.69503	1.69503	1.69503
MEDP0336	6	4.84445e+06	7.8691e+06	3.306e+06	1.62358e+07	7.18417e+06	5.04172e+06	7.76698e+06	6.24741e+06	9.88668e+06	1.19831e+06	1.31885e+07	1.31248e+07	3.82538e+06	4.27269e+06	1.82931e+06	1.05868e+06	726920	415667	871428	1.07332e+06	1.3204e+06	1.21698e+06	2.31502e+06	774360
MEDP1692	9	2.45436e+06	2.18865e+06	1.08661e+06	2.77174e+06	2.57816e+06	2.31449e+06	196886	210649	241072	71696.8	502831	343347	2.00903e+06	1.4273e+06	796513	573317	388649	293087	100930	164844	193312	247959	239855	84513.8
MEDP1346	9	5.38457e+07	5.59321e+07	2.94356e+07	5.08084e+07	5.5611e+07	6.04259e+07	2.65475e+06	3.18772e+06	3.31845e+06	1.18579e+06	8.31298e+06	6.6345e+06	2.53246e+07	2.06206e+07	1.04255e+07	6.42335e+06	5.64833e+06	3.63937e+06	2.03236e+06	3.53023e+06	3.46753e+06	4.99489e+06	4.73452e+06	1.53246e+06
MEDP1699	9	632102	777527	540174	993679	539218	555735	168385	69618	139970	59475.6	197975	184496	198408	119225	104081	58827.4	83786.6	43284.3	167188	57041.2	36993.1	42546.9	87663.7	65425.7
MEDP1691	1	2.09075e+08	2.09097e+08	2.08284e+08	2.08929e+08	2.02149e+08	1.99999e+08	1.98403e+08	1.56236e+08	2.49928e+08	176034854	2.38837e+08	2.07091e+08	1.88728e+08	1.96684e+08	1.97899e+08	194730581	1.98574e+08	1.96727e+08	2.33214e+08	230741633	2.5304e+08	2.31814e+08	1.52092e+08	228751441
MEDP1700	9	1.06226e+07	6.39925e+06	4.42279e+06	6.64459e+06	8.61889e+06	9.82323e+06	754462	825886	927997	487045	1.91585e+06	1.50168e+06	4.52131e+06	2.72365e+06	1.865e+06	1.9909e+06	1.94844e+06	1.40302e+06	631689	895664	1.00523e+06	1.27049e+06	1.39012e+06	650210
MEDP1701	9	5.77863e+06	4.44573e+06	3.46778e+06	4.56647e+06	4.49962e+06	5.7339e+06	299782	173632	361304	160964	603663	498173	1.40064e+06	901690	793421	514988	649974	508324	337429	419665	315068	389248	667181	499658
MEDP0495	9	1.8877e+06	2.07641e+06	1.52667e+06	2.05316e+06	2.37921e+06	1.65811e+06	410660	230207	413746	129178	468645	708502	1.2169e+06	1.056e+06	476136	357420	532656	373572	123106	230876	226480	208946	358687	285927
MEDP1331	6	102676	78892	76974.5	121854	115711	72417.6	47214.8	27173.1	36989	12199.2	53069.4	79819.5	5.03303	5.03303	5.03303	5.03303	5.03303	5.03303	2.81005	2.81005	2.81005	2.81005	2.81005	2.81005
MEDP1333	9	155863	117439	79684.8	129374	192751	126994	29777.7	15700.3	23705.9	13502.5	52733.1	49920.7	117406	77192.2	59653.2	40099.5	65070.1	55584.5	29088.6	22253.4	21103.9	32503.7	46860.2	28201
MEDP1318	9	12849	5527.75	3603.46	10286.9	11725.3	6462.01	4452.32	2303.44	3921.66	2536.25	6475.22	5954.49	8170.74	6266.13	7674.16	2805.43	7132.97	5843.06	4304.84	4437.45	1843.61	5755.19	5970.56	1086.98
MEDP1321	5	15288.6	6721.73	6287.03	13368.3	14728.5	9586.07	2709.89	818.043	1032.39	590.048	2976.07	2755.99	16625.9	8248.28	11955.7	6111.93	9668.14	9087.17	3747.92	3591.98	1864.59	4596.33	4131.63	4681.63
MEDP1693	5	264277	357844	208391	1.05566e+06	371720	253058	210726	219858	292038	16502.6	312055	398906	2.42946e+06	3.62636e+06	755095	269609	259644	148869	34428.1	78601	99807.9	178218	345295	23731.1
MEDP1779	5	21385.9	23091.8	10349.3	55831.5	20737.7	13381.8	7965.45	13328	13107.3	4544.53	16562.5	17830.3	95844.7	81566.9	37267.2	15390.6	12609.2	11076.4	5.82204	5.82204	5.82204	5.82204	5.82204	5.82204
MEDP0494	9	2.45436e+06	2.18865e+06	1.08661e+06	2.77174e+06	2.57816e+06	2.31449e+06	196886	210649	241072	71696.8	502831	343347	2.00903e+06	1.4273e+06	796513	573317	388649	293087	100930	164844	193312	247959	239855	84513.8
MEDP0338	9	5.38457e+07	5.59321e+07	2.94356e+07	5.08084e+07	5.5611e+07	6.04259e+07	2.65475e+06	3.18772e+06	3.31845e+06	1.18579e+06	8.31298e+06	6.6345e+06	2.53246e+07	2.06206e+07	1.04255e+07	6.42335e+06	5.64833e+06	3.63937e+06	2.03236e+06	3.53023e+06	3.46753e+06	4.99489e+06	4.73452e+06	1.53246e+06
MEDP1348	9	632102	777527	540174	993679	539218	555735	168385	69618	139970	59475.6	197975	184496	198408	119225	104081	58827.4	83786.6	43284.3	167188	57041.2	36993.1	42546.9	87663.7	65425.7
MEDP0434	7	1.06984e+08	1.09174e+08	1.10709e+08	1.0902e+08	1.05319e+08	1.06163e+08	1.11455e+08	1.26766e+08	1.2656e+08	1.27391e+08	1.28053e+08	1.03981e+08	9.89288e+07	1.01068e+08	1.04549e+08	9.99118e+07	101481847	101914770	1.20176e+08	1.24929e+08	1.26543e+08	1.19019e+08	101388046	1.15187e+08
MEDP1337	9	1.06226e+07	6.39925e+06	4.42279e+06	6.64459e+06	8.61889e+06	9.82323e+06	754462	825886	927997	487045	1.91585e+06	1.50168e+06	4.52131e+06	2.72365e+06	1.865e+06	1.9909e+06	1.94844e+06	1.40302e+06	631689	895664	1.00523e+06	1.27049e+06	1.39012e+06	650210
MEDP1339	9	5.77863e+06	4.44573e+06	3.46778e+06	4.56647e+06	4.49962e+06	5.7339e+06	299782	173632	361304	160964	603663	498173	1.40064e+06	901690	793421	514988	649974	508324	337429	419665	315068	389248	667181	499658
MEDP1341	9	1.8877e+06	2.07641e+06	1.52667e+06	2.05316e+06	2.37921e+06	1.65811e+06	410660	230207	413746	129178	468645	708502	1.2169e+06	1.056e+06	476136	357420	532656	373572	123106	230876	226480	208946	358687	285927
MEDP1332	6	102676	78892	76974.5	121854	115711	72417.6	47214.8	27173.1	36989	12199.2	53069.4	79819.5	5.03303	5.03303	5.03303	5.03303	5.03303	5.03303	2.81005	2.81005	2.81005	2.81005	2.81005	2.81005
MEDP1334	9	155863	117439	79684.8	129374	192751	126994	29777.7	15700.3	23705.9	13502.5	52733.1	49920.7	117406	77192.2	59653.2	40099.5	65070.1	55584.5	29088.6	22253.4	21103.9	32503.7	46860.2	28201
MEDP1319	9	12849	5527.75	3603.46	10286.9	11725.3	6462.01	4452.32	2303.44	3921.66	2536.25	6475.22	5954.49	8170.74	6266.13	7674.16	2805.43	7132.97	5843.06	4304.84	4437.45	1843.61	5755.19	5970.56	1086.98
MEDP1322	5	10766.6	5615.81	6042.18	8562.07	13391.6	9028.35	1189.87	1044.47	1695.24	1300.01	2899.86	2015.38	13248.4	9131.25	12205.8	3887.24	10426.8	5912.47	2010.72	3477.66	3339.22	4884.43	4336.47	4036.17
MEDP0537	9	1.06226e+07	6.39925e+06	4.42279e+06	6.64459e+06	8.61889e+06	9.82323e+06	754462	825886	927997	487045	1.91585e+06	1.50168e+06	4.52131e+06	2.72365e+06	1.865e+06	1.9909e+06	1.94844e+06	1.40302e+06	631689	895664	1.00523e+06	1.27049e+06	1.39012e+06	650210
MEDP1695	5	25582.9	36332.9	36974.4	59261.2	39601.7	36010.3	2786.73	9954.08	14487.5	7141.71	24411.2	14869.9	106678	47077.8	45390.9	41789.1	39446.1	22295.1	9487.85	8900.45	3079.16	9517.1	21747.2	7082.69
MEDP1658	2	12916.7	7912.33	14784.6	9948.94	9082.91	8736.49	3510.55	1486.07	1768.26	1204.94	3217.2	4090.01	19547.6	1669.79	2047.47	2481.84	3804.12	1538.16	9404.96	8133.26	4910.77	6500.32	37099.2	2410.92
MEDP1686	6	54111	55319.4	28016.7	59192	50472.8	44833.4	26478.2	15366.4	29260.1	4874.53	51394.3	54175.8	54543.4	34203.2	15988.4	16329.1	9693.49	7344.11	9857.49	9666.39	8224.05	6347.19	9860.13	10072
MEDP1657	9	99755.2	59051.3	71311.1	108885	98060.9	84310.5	4379.78	3883.37	5145.99	2190.11	5848.9	6975.12	102541	37703.1	27565.3	25316.5	26931.1	15885.5	29687.9	14223	14123.9	16213.9	71575.8	4959.09
MEDP1221	9	5.75343e+07	5.78693e+07	3.02879e+07	5.42073e+07	5.99403e+07	6.34194e+07	2.89639e+06	3.32259e+06	3.97712e+06	1.2343e+06	8.67886e+06	7.40487e+06	2.59924e+07	2.02271e+07	1.05938e+07	7.0302e+06	5.95123e+06	3.76079e+06	2.05992e+06	3.86153e+06	3.64058e+06	5.89355e+06	7.6301e+06	1.80235e+06
MEDN1485	9	144028	134782	59397.7	104714	123977	95681.8	21919.7	9780.54	12713.7	7933.06	28835.1	34207	27742.5	19793.2	14827.2	14897.4	16750.3	16500.3	15129.4	6191.59	14652.6	13740.4	29500.1	17326.3
MEDN1285	9	3.4583e+06	4.31212e+06	2.68731e+06	5.14023e+06	4.00329e+06	3.38115e+06	471409	373784	322444	56759.5	812845	1.04601e+06	3.89599e+06	2.99334e+06	2.11824e+06	805657	603479	564649	277426	415314	412821	599466	899642	201937
MEDN1287	9	309931	404831	228991	372654	237759	259174	114871	28022.3	47509.5	19994.4	90467.5	134350	61653.6	47784.5	59287.5	31086.4	20926.1	23821.4	18835.6	29865.4	17551.7	20713.1	39931.8	23613.5
MEDN1279	9	3.21959e+06	2.32402e+06	2.00534e+06	2.48497e+06	3141396	2.88608e+06	197265	165102	210690	47603.8	524230	429804	1.47799e+06	936361	703904	413654	328013	365989	181455	278788	218996	391862	525069	180515
MEDN1282	9	4.03827e+06	5.43487e+06	2.03082e+06	3.3106e+06	3.93522e+06	2.74492e+06	1.03453e+06	290733	322429	141271	779461	2.11822e+06	869749	646992	377092	356192	395010	468781	150942	268847	226141	275449	516670	494278
MEDN1271	6	24226.1	23205.5	11022.8	18993.5	30437.8	18219	17442.2	4460.36	3128.16	2.01667	4846.39	29219.9	8.8006	8.8006	8.8006	8.8006	8.8006	8.8006	2016.41	6668.58	4169.27	10048.7	14907.6	8344.14
MEDN1273	9	25858.3	5.84964	9830.56	24018.1	13403.8	16681.2	1.08693	1.08693	1.08693	1.08693	1.08693	1.08693	6714.84	3408.82	2297.96	5.84964	5.84964	6813.47	4014.63	3741.04	4676.33	6941.75	9147.95	2730.87
MEDN1264	9	39320.6	28685	9294.29	30119.6	24855.4	19926.8	4864.36	975.553	1.09474	1034.28	3589.08	5458.03	7.65932	7.65932	7.65932	7.65932	7.65932	7.65932	1483.72	968.864	2211.86	3026.76	5042.8	2408.8
MEDN1267	9	14754.1	10266.7	5235.51	9228.97	11561.9	8161.64	0.681513	0.681513	0.681513	0.681513	0.681513	0.681513	2673.54	1085.03	2402.64	1358.86	2166.65	2325.03	1185.9	1105.7	1143.74	1360.25	2678.69	2238.72
MEDN1269	9	3266.81	1856.16	900.268	1496.71	2935.04	1766.16	0.350434	0.350434	0.350434	0.350434	0.350434	0.350434	1857.23	1078.69	3113.1	929.578	1198.29	1467.86	1058.38	501.662	372.364	969.443	2810.38	1163.88
MEDN0368	5	284486	600972	314126	905410	466437	326067	98402.2	70814.3	74783.2	9254.77	152238	192400	1.1789e+06	1.01984e+06	441291	210467	80486.8	44951.9	24855	44871.7	47844.2	74111.9	94422.4	16302.8
MEDN0366	9	3.4583e+06	4.31212e+06	2.68731e+06	5.14023e+06	4.00329e+06	3.38115e+06	471409	373784	322444	56759.5	812845	1.04601e+06	3.89599e+06	2.99334e+06	2.11824e+06	805657	603479	564649	277426	415314	412821	599466	899642	201937
MEDP0638	9	10792.4	9007.32	7899.5	12150.6	7704.4	5774.3	2429.41	711.376	1118.39	436.91	1985.16	2894.52	3699.38	1234.02	2263.22	1127.94	298.99	1163.29	452.261	479.603	313.334	699.551	1532.4	568.881
MEDP1875	9	59756	58321.7	41173.1	40308.4	40690.6	57456.4	15546.9	3907.43	5645.29	5117.02	22537.2	14496.9	18924.1	11632	26053.4	12316.2	4972.04	12468.5	8901.93	7335.37	12332.4	11212.7	13105.1	36241.9
MEDN0364	9	3.21959e+06	2.32402e+06	2.00534e+06	2.48497e+06	3141396	2.88608e+06	197265	165102	210690	47603.8	524230	429804	1.47799e+06	936361	703904	413654	328013	365989	181455	278788	218996	391862	525069	180515
MEDN0362	9	5.96341e+06	6.62504e+06	5.01519e+06	4.7988e+06	5.55397e+06	5.8145e+06	1.23031e+06	582381	646235	258424	1.73329e+06	2.1478e+06	1.63985e+06	1.22212e+06	1.72088e+06	943200	715493	1.21768e+06	873332	1.03847e+06	819470	900489	1.82175e+06	1.46124e+06
MEDP1904	9	4.37817e+06	5.52237e+06	2.36407e+06	3.8163e+06	4.94153e+06	3.21845e+06	1.20691e+06	346598	484379	211647	1.3437e+06	1.98674e+06	813646	722194	418488	405920	530137	589027	239286	351005	354597	413374	921522	682622
MEDN1272	6	24226.1	23205.5	11022.8	18993.5	30437.8	18219	17442.2	4460.36	3128.16	2.01667	4846.39	29219.9	8.8006	8.8006	8.8006	8.8006	8.8006	8.8006	2016.41	6668.58	4169.27	10048.7	14907.6	8344.14
MEDN1274	9	25858.3	5.84964	9830.56	24018.1	13403.8	16681.2	1.08693	1.08693	1.08693	1.08693	1.08693	1.08693	6714.84	3408.82	2297.96	5.84964	5.84964	6813.47	4014.63	3741.04	4676.33	6941.75	9147.95	2730.87
MEDN1276	9	144028	134782	59397.7	104714	123977	95681.8	21919.7	9780.54	12713.7	7933.06	28835.1	34207	27742.5	19793.2	14827.2	14897.4	16750.3	16500.3	15129.4	6191.59	14652.6	13740.4	29500.1	17326.3
MEDN1265	9	39320.6	28685	9294.29	30119.6	24855.4	19926.8	4864.36	975.553	1.09474	1034.28	3589.08	5458.03	7.65932	7.65932	7.65932	7.65932	7.65932	7.65932	1483.72	968.864	2211.86	3026.76	5042.8	2408.8
MEDN1268	9	14754.1	10266.7	5235.51	9228.97	11561.9	8161.64	0.681513	0.681513	0.681513	0.681513	0.681513	0.681513	2673.54	1085.03	2402.64	1358.86	2166.65	2325.03	1185.9	1105.7	1143.74	1360.25	2678.69	2238.72
MEDN1270	9	3266.81	1856.16	900.268	1496.71	2935.04	1766.16	0.350434	0.350434	0.350434	0.350434	0.350434	0.350434	1857.23	1078.69	3113.1	929.578	1198.29	1467.86	1058.38	501.662	372.364	969.443	2810.38	1163.88
MEDN0209	5	49315.6	31588.9	37745	28499.8	15408.4	65029	4005.2	2948.55	3597.77	3365.29	4515.54	5095.47	20862.9	54861.4	77536	34277.2	6472.31	39903.4	9554.36	28861.9	14284.6	16613.5	9578.46	47075.3
MEDN1921	2	98683.8	98683.8	136486	63532.5	77052.3	71503.8	87597.2	79676.6	91965.6	44534.7	55057.6	58418.6	67331.8	38256.3	38058.5	51495.2	67374.8	85241	108198	70531.1	75228.7	72848.8	75788.1	79631.2
MEDN1897	7	1.71405e+06	1.54737e+06	1.84724e+06	2.98775e+06	1.34038e+06	1.7129e+06	2.81222e+06	3.93975e+06	2.26206e+06	2.80945e+06	3.97392e+06	3.84211e+06	1.47398e+06	2.17855e+06	863038	1.15034e+06	786956	1.40591e+06	2.61149e+06	3.62379e+06	2.37203e+06	2.38236e+06	2.41807e+06	2.53865e+06
MEDN2056	9	136612	130287	147083	97046.1	115484	147155	85085.3	102076	89908.2	68273.8	97208.6	63183.1	74592	63349	77653.3	119558	113416	106265	69658.9	93965.9	116690	56692.9	85125.3	119917
MEDN1931	9	502048	419918	405228	330901	391056	384780	370345	300894	354894	242537	211491	214253	372510	229799	317617	350534	289661	422259	260582	329055	340973	335396	330053	417515
MEDP2366	9	34313.1	72243.8	75855.9	50573	35212.1	174392	21909.4	19718.5	13595.1	15712	38511.6	14381.1	8243.88	9550.67	6411.85	16546.3	23525.5	4707.35	6.08957	6.14031	6.11105	6.59187	6.81776	6.111
MEDP2359	6	5.64642e+06	5.23415e+06	4.52587e+06	2.82254e+06	3.30227e+06	6.0329e+06	2.22286e+06	4.16281e+06	3.03519e+06	3.40978e+06	4.31716e+06	4.39499e+06	557550	806069	1.23437e+06	3.65866e+06	1.55889e+06	1.37132e+06	1.59969e+06	1.05296e+06	1.36726e+06	1.8273e+06	1.7699e+06	2.58346e+06
MEDN0210	5	211004	149010	108819	74030.6	88898.4	162419	96465.3	209670	89737.1	103474	194168	101624	142782	123824	185495	165784	196477	58472.7	63779.4	62930.4	41530.6	91774.3	89626.8	83038.6
MEDN1011	7	36571.6	30600	28902.1	27602.2	39812.8	29751.1	24753.6	74259.3	15612.3	38653.7	62806	59276.1	29753.6	48080.3	14620.1	52705.5	44875.9	28902.1	59205.9	32961.8	35788.3	44572.2	51103.1	42109.7
MEDN0213	7	36571.6	30600	28902.1	27602.2	39812.8	29751.1	24753.6	74259.3	15612.3	38653.7	62806	59276.1	29753.6	48080.3	14620.1	52705.5	44875.9	28902.1	59205.9	32961.8	35788.3	44572.2	51103.1	42109.7
MEDN0120	7	36571.6	30600	28902.1	27602.2	39812.8	29751.1	24753.6	74259.3	15612.3	38653.7	62806	59276.1	29753.6	48080.3	14620.1	52705.5	44875.9	28902.1	59205.9	32961.8	35788.3	44572.2	51103.1	42109.7
MEDN1538	7	3.73026e+06	4.54643e+06	3.81115e+06	5.2302e+06	4.1637e+06	4.9291e+06	7.33227e+06	1.03908e+07	5.76531e+06	6.01405e+06	7.67631e+06	6.69129e+06	3.8648e+06	6.38705e+06	2.42786e+06	3.19536e+06	2.84387e+06	4.31318e+06	5.57715e+06	5.35177e+06	5.30388e+06	5.3909e+06	5.7512e+06	4.66986e+06
MEDN0808	3	4.62122e+06	3.55342e+06	4.58815e+06	3.29935e+06	3.44553e+06	4.21485e+06	4.47618e+06	5.86928e+06	3.94336e+06	5.15069e+06	7.86241e+06	5.76922e+06	4.66674e+06	1.84947e+06	3.22654e+06	3.21085e+06	3.75135e+06	3.37376e+06	6.81126e+06	4.64702e+06	3.1743e+06	2.82562e+06	3.32585e+06	3.74714e+06
MEDN1108	3	4.57126e+06	4.39728e+06	3.27539e+06	5.32e+06	3.81376e+06	3.82656e+06	8.46065e+06	1.52366e+07	8.67307e+06	1.47188e+07	1.53671e+07	1.29671e+07	3.06283e+06	6.58227e+06	1.70689e+06	3.80891e+06	1.90682e+06	2.68159e+06	8.4906e+06	4.96379e+06	3.97514e+06	5.0464e+06	4.07334e+06	5.17864e+06
MEDN0539	6	8.6386e+07	1.37651e+08	9.0093e+07	9.66544e+07	5.77485e+07	9.02001e+07	9.96901e+07	1.67342e+08	9.15087e+07	1.08021e+08	1.94318e+08	1.53714e+08	1.59936e+06	5.04894e+06	1.95789e+06	1.82781e+06	5.3421e+06	2.29606e+06	5.89762e+07	1.64015e+07	2.54429e+07	3.65364e+07	3.89274e+07	5.64706e+07
MEDN1947	6	8.6386e+07	1.37651e+08	9.0093e+07	9.66544e+07	5.77485e+07	9.02001e+07	9.96901e+07	1.67342e+08	9.15087e+07	1.08021e+08	1.94318e+08	1.53714e+08	1.59936e+06	5.04894e+06	1.95789e+06	1.82781e+06	5.3421e+06	2.29606e+06	5.89762e+07	1.64015e+07	2.54429e+07	3.65364e+07	3.89274e+07	5.64706e+07
MEDN2101	3	4.62122e+06	3.55342e+06	4.58815e+06	3.29935e+06	3.44553e+06	4.21485e+06	4.47618e+06	5.86928e+06	3.94336e+06	5.15069e+06	7.86241e+06	5.76922e+06	4.66674e+06	1.84947e+06	3.22654e+06	3.21085e+06	3.75135e+06	3.37376e+06	6.81126e+06	4.64702e+06	3.1743e+06	2.82562e+06	3.32585e+06	3.74714e+06
MEDN1762	3	4.62122e+06	3.55342e+06	4.58815e+06	3.29935e+06	3.44553e+06	4.21485e+06	4.47618e+06	5.86928e+06	3.94336e+06	5.15069e+06	7.86241e+06	5.76922e+06	4.66674e+06	1.84947e+06	3.22654e+06	3.21085e+06	3.75135e+06	3.37376e+06	6.81126e+06	4.64702e+06	3.1743e+06	2.82562e+06	3.32585e+06	3.74714e+06
MEDP0224	3	5.16277e+07	3.29759e+07	1.90603e+07	1.67125e+07	3.01049e+07	3.80173e+07	4.60979e+07	6.91726e+07	39011967	5.71537e+07	3.84097e+07	28094196	7.07972e+06	5.3907e+06	8.6347e+06	1.51856e+07	1.45914e+07	1.60497e+07	1.62996e+07	1.60325e+07	1.61783e+07	1.46013e+07	2.04265e+07	1.95874e+07
MEDN0220	3	4.62122e+06	3.55342e+06	4.58815e+06	3.29935e+06	3.44553e+06	4.21485e+06	4.47618e+06	5.86928e+06	3.94336e+06	5.15069e+06	7.86241e+06	5.76922e+06	4.66674e+06	1.84947e+06	3.22654e+06	3.21085e+06	3.75135e+06	3.37376e+06	6.81126e+06	4.64702e+06	3.1743e+06	2.82562e+06	3.32585e+06	3.74714e+06
MEDP2343	7	32212.8	63095.4	169178	61760.6	71966.1	50114.2	399233	49519.4	64924.9	19364.4	53067	41270.3	28575.5	37752.6	27339.8	79868.7	104732	113478	27559.7	167507	59864	197031	100253	57788.1
MEDN0221	3	4.62122e+06	3.55342e+06	4.58815e+06	3.29935e+06	3.44553e+06	4.21485e+06	4.47618e+06	5.86928e+06	3.94336e+06	5.15069e+06	7.86241e+06	5.76922e+06	4.66674e+06	1.84947e+06	3.22654e+06	3.21085e+06	3.75135e+06	3.37376e+06	6.81126e+06	4.64702e+06	3.1743e+06	2.82562e+06	3.32585e+06	3.74714e+06
MEDN1955	6	2.25376e+08	1.92429e+08	1.72514e+08	165069756	2.05918e+08	2.31326e+08	1.58619e+08	1.49654e+08	1.45555e+08	1.46987e+08	1.48836e+08	9.75781e+07	5.73459e+07	6.74976e+07	7.37013e+07	7.61004e+07	4.97306e+07	6.57911e+07	4.08195e+07	8.24318e+07	9.09368e+07	9.11307e+07	5.66377e+07	7.15526e+07
MEDN1534	3	4.62122e+06	3.55342e+06	4.58815e+06	3.29935e+06	3.44553e+06	4.21485e+06	4.47618e+06	5.86928e+06	3.94336e+06	5.15069e+06	7.86241e+06	5.76922e+06	4.66674e+06	1.84947e+06	3.22654e+06	3.21085e+06	3.75135e+06	3.37376e+06	6.81126e+06	4.64702e+06	3.1743e+06	2.82562e+06	3.32585e+06	3.74714e+06
MEDN1761	3	4.62122e+06	3.55342e+06	4.58815e+06	3.29935e+06	3.44553e+06	4.21485e+06	4.47618e+06	5.86928e+06	3.94336e+06	5.15069e+06	7.86241e+06	5.76922e+06	4.66674e+06	1.84947e+06	3.22654e+06	3.21085e+06	3.75135e+06	3.37376e+06	6.81126e+06	4.64702e+06	3.1743e+06	2.82562e+06	3.32585e+06	3.74714e+06
MEDN0224	6	2.73661e+06	1.89428e+06	1.55425e+06	1.13663e+06	1.50176e+06	2.03714e+06	1.12623e+06	1.94436e+06	1.19446e+06	1.76361e+06	1.53164e+06	1.67273e+06	1.10702e+06	1.05529e+06	1.29062e+06	1.99102e+06	1.66187e+06	1.5085e+06	1.01087e+06	966408	942801	1.05534e+06	1.07033e+06	1.17223e+06
MEDN1760	7	5.87292e+06	6.71401e+06	5.07559e+06	9.01779e+06	5.95884e+06	8.12657e+06	8.94776e+06	1.17393e+07	8.87202e+06	7.88572e+06	1.28938e+07	1.02058e+07	5.30431e+06	7.38213e+06	3.72802e+06	4.19771e+06	4.30739e+06	6.25787e+06	8.63979e+06	7.81508e+06	8.40998e+06	7.11557e+06	8.24648e+06	8.45292e+06
MEDN1935	5	125080	190496	117496	314681	122196	150674	104700	195446	65648.1	96415.3	128958	107777	163945	438281	275888	343880	221615	245523	69527.3	84274.4	153298	93001.1	126572	72374.3
MEDN1758	3	1.07536e+06	1.45711e+06	788383	1.94726e+06	1.01562e+06	3.06694e+06	2.76473e+06	1.09068e+07	2.82492e+06	7.14282e+06	1.75824e+07	6.96e+06	1.20759e+06	1.44657e+06	331472	1.20777e+06	401500	1.20447e+06	4.20589e+06	1.37663e+06	1.04755e+06	1.49641e+06	1.64317e+06	1.03608e+06
MEDN1757	3	1.07536e+06	1.45711e+06	788383	1.94726e+06	1.01562e+06	3.06694e+06	2.76473e+06	1.09068e+07	2.82492e+06	7.14282e+06	1.75824e+07	6.96e+06	1.20759e+06	1.44657e+06	331472	1.20777e+06	401500	1.20447e+06	4.20589e+06	1.37663e+06	1.04755e+06	1.49641e+06	1.64317e+06	1.03608e+06
MEDN0232	5	211004	149010	108819	74030.6	88898.4	162419	96465.3	209670	89737.1	103474	194168	101624	142782	123824	185495	165784	196477	58472.7	63779.4	62930.4	41530.6	91774.3	89626.8	83038.6
MEDN0229	6	2.73661e+06	1.89428e+06	1.55425e+06	1.13663e+06	1.50176e+06	2.03714e+06	1.12623e+06	1.94436e+06	1.19446e+06	1.76361e+06	1.53164e+06	1.67273e+06	1.10702e+06	1.05529e+06	1.29062e+06	1.99102e+06	1.66187e+06	1.5085e+06	1.01087e+06	966408	942801	1.05534e+06	1.07033e+06	1.17223e+06
MEDN0230	6	2.73661e+06	1.89428e+06	1.55425e+06	1.13663e+06	1.50176e+06	2.03714e+06	1.12623e+06	1.94436e+06	1.19446e+06	1.76361e+06	1.53164e+06	1.67273e+06	1.10702e+06	1.05529e+06	1.29062e+06	1.99102e+06	1.66187e+06	1.5085e+06	1.01087e+06	966408	942801	1.05534e+06	1.07033e+06	1.17223e+06
MEDN0233	6	2.73661e+06	1.89428e+06	1.55425e+06	1.13663e+06	1.50176e+06	2.03714e+06	1.12623e+06	1.94436e+06	1.19446e+06	1.76361e+06	1.53164e+06	1.67273e+06	1.10702e+06	1.05529e+06	1.29062e+06	1.99102e+06	1.66187e+06	1.5085e+06	1.01087e+06	966408	942801	1.05534e+06	1.07033e+06	1.17223e+06
MEDP0067	3	446526	372813	288564	213640	305486	369250	1.30129e+06	1.78467e+06	424703	171293	1.91552e+06	1.97644e+06	41251.2	29468.7	56575.9	139022	131589	72429.8	36072.9	64107.1	71151.2	5.22328	82419.6	73027.5
MEDN1087	4	34080.4	42240.1	40531.9	15747.5	29908.8	14724.7	45773	17089.8	81379.3	27650.1	32583.2	27689.3	5.44142e+07	5.15322e+07	5.32029e+07	5.49751e+07	5.17727e+07	5.18685e+07	6.71564e+07	7.7026e+07	6.85122e+07	6.1562e+07	4.86847e+07	5.90701e+07
MEDN0538	4	34080.4	42240.1	40531.9	15747.5	29908.8	14724.7	45773	17089.8	81379.3	27650.1	32583.2	27689.3	5.44142e+07	5.15322e+07	5.32029e+07	5.49751e+07	5.17727e+07	5.18685e+07	6.71564e+07	7.7026e+07	6.85122e+07	6.1562e+07	4.86847e+07	5.90701e+07
MEDN1631	4	0.895847	0.895847	0.895847	0.895847	0.895847	0.895847	12.1612	12.1612	12.1612	12.1612	12.1612	12.1612	3.04899e+06	3.03989e+06	3.56213e+06	3.16028e+06	3.41448e+06	2.72404e+06	4.75396e+06	4.75982e+06	4.29535e+06	3.92944e+06	4.79964e+06	4.30567e+06
MEDP1844	5	1.00107e+06	1.47112e+06	1.01465e+06	1.20661e+06	1.25895e+06	841826	1.2994e+06	969748	801489	802516	786402	1.23887e+06	1.16957e+06	1.38573e+06	1.32184e+06	1.89648e+06	2.02272e+06	1.22618e+06	1.34142e+06	925156	711156	1.39287e+06	1.4243e+06	1.08321e+06
MEDN1943	3	513852	428348	497216	437383	361285	629895	1.35663e+06	4.8738e+06	1.14114e+06	560064	2.21324e+06	1.7196e+06	130737	244667	239619	98015.7	168302	151031	248627	126648	215555	141824	207951	193173
MEDN1532	3	805396	474964	634901	574977	536236	715407	1.12101e+06	4.03971e+06	1.02358e+06	602256	1.84776e+06	1.53302e+06	174252	121155	172028	180013	134982	205269	213657	201690	193493	104530	147129	111409
MEDN0239	3	783283	920981	733719	364293	559747	962643	1.24837e+06	2.33862e+06	694182	242016	1.37976e+06	1.43701e+06	417763	445073	557342	757677	1.14469e+06	221184	300470	273947	200822	345635	476092	146047
MEDN0237	3	735690	264987	552769	152341	231606	807349	1.02876e+06	4.50709e+06	799620	291105	1.36642e+06	1.30811e+06	115560	48408	64491.7	106550	147851	63766.7	137607	103179	82021	69932.2	96673	77341.8
MEDN2102	5	46559.1	44348.7	48777.5	56073.9	34509	52105.4	26074.1	42714.7	25673.5	17623.5	26117	24974.6	43157.1	51101.9	56778.8	68129.1	77205.5	68135.9	33349.4	32121	133293	19581.4	33353.1	9881.7
MEDN2150	2	24555.4	8.8374	12279.1	32780	10928.5	20934.6	4.46797	4.46797	4.46797	4.46797	4.46797	4.46797	14566.1	8.8374	12250.2	12742.6	22755.4	14205.9	20723.4	16939.2	14646.3	32500.4	19681.2	12358
MEDP0232	3	446526	372813	288564	213640	305486	369250	1.30129e+06	1.78467e+06	424703	171293	1.91552e+06	1.97644e+06	41251.2	29468.7	56575.9	139022	131589	72429.8	36072.9	64107.1	71151.2	5.22328	82419.6	73027.5
MEDP1419	2	165100	144903	127739	224218	67723.9	157621	18918.7	9035.69	7211.68	11804.2	10713.1	6241.36	34810	27673.7	82312.5	47528.6	48926.2	29108.9	225054	321061	130665	119645	660354	212820
MEDP1397	4	33226.6	48684.2	18313.6	49863.3	7517.03	24484.3	15513	7195.23	5311.44	10652.9	11319.3	11813.9	139596	65444	40772.6	114470	226242	57944.5	127268	63631.5	42437.9	29976.2	508062	37294.2
MEDP1389	4	61833.7	59612	72274.4	119439	44760.7	51519.4	34031.5	25095	30803.9	50761.3	56913.3	34864.9	104618	51926.5	45754.7	107756	175217	63204.7	335772	130925	78356.9	41586.4	310438	129838
MEDP1387	3	388718	411711	349233	336018	376784	370809	357778	440658	571628	467429	341432	219552	348898	383792	410105	325045	401133	341510	458276	390934	390293	423940	223303	333445
MEDP1373	9	13631.7	10972.2	10162.5	8514	8466.14	12425.8	2400.88	1.49336	1957.91	1.49346	3254.97	4192.26	4116.76	2523.97	4043.5	2596.04	2090.98	3196.91	1553.44	1663.35	2585.67	2411.82	2668.36	3496.59
MEDP0510	2	6.61205e+08	6.29733e+08	6.42583e+08	676697033	6.90103e+08	6.99772e+08	5.11788e+08	3.64604e+08	5.52998e+08	9.75228e+08	6.31848e+08	4.84653e+08	4.24933e+08	4.1688e+08	4.65374e+08	4.96786e+08	5.3629e+08	5.38798e+08	8.25263e+08	581438800	4.97475e+08	5.9738e+08	621824686	7.55256e+08
MEDP1665	4	1.67056e+08	1.30956e+08	1.28206e+08	1.2662e+08	1.32147e+08	1.4463e+08	141617995	1.13396e+08	2.04137e+08	1.87559e+08	123737534	1.55274e+08	3.04424e+08	2.08369e+08	357418250	1.86091e+08	2.91296e+08	1.87098e+08	2.75747e+08	2.5574e+08	2.47354e+08	2.08005e+08	3.52406e+08	355335709
MEDP1442	1	3.2184e+08	415550356	3.17283e+08	279441465	1.94683e+08	2.61229e+08	2.5097e+08	1.67274e+08	2.7489e+08	9.0843e+08	4.27551e+08	1.71017e+08	3.10317e+08	3.57187e+08	4.56979e+08	2.83533e+08	5.22452e+08	4.1629e+08	7.84204e+08	3.59155e+08	3.63561e+08	5.49161e+08	840465125	7.23752e+08
MEDP1434	4	1.78153e+07	1.39462e+07	1.52867e+07	1.73522e+07	1.59786e+07	1.51522e+07	1.20051e+07	8.40054e+06	1.21847e+07	1.45718e+07	1.63329e+07	1.10023e+07	2.44433e+07	1.94552e+07	1.98251e+07	22600416	6.38602e+07	2.65851e+07	3.53854e+07	3.65983e+07	3.52759e+07	2.99888e+07	3.63594e+07	2.88252e+07
MEDP1440	1	2.74202e+08	2.60819e+08	2.09204e+08	2.14458e+08	1.58385e+08	234784724	1.10425e+08	8.73258e+07	1.49061e+08	2.32719e+08	2.39773e+08	8.4716e+07	2.18652e+08	2.39138e+08	2.45426e+08	200464682	1.89795e+08	2.42537e+08	3.73644e+08	4.05924e+08	3.3803e+08	4.24164e+08	3.9258e+08	6.47601e+08
MEDP1441	2	7.28123e+06	7.59443e+06	8.57179e+06	8.46643e+06	5.8596e+06	8.77173e+06	5.4576e+06	6.65464e+06	5.18336e+06	9.35531e+06	1.01e+07	6.90965e+06	7.92221e+06	6.41528e+06	7.5068e+06	3.75333e+06	6.80536e+06	4.46064e+06	9.15787e+06	8.10924e+06	4.71986e+06	6.98806e+06	1.38879e+07	5.64451e+06
MEDP1429	6	106345	115924	156029	112162	138922	114442	93807.5	49091.8	92718.1	473196	108770	61694.4	40769.1	41347.5	39803.9	1.71079	33671.6	12695.1	44405.4	15.3187	15.3187	14336.5	66513.6	18278
MEDP1289	4	1.42866e+06	1.62651e+06	2.53302e+06	1.97586e+06	1.52354e+06	1.56725e+06	1.70974e+06	890872	1.28125e+06	3.23808e+06	1.45421e+06	908801	5.20726e+06	3.62966e+06	5.03469e+06	2.90974e+06	4.56626e+06	2.56505e+06	5.75358e+06	5.19663e+06	3.26044e+06	3.4899e+06	1.20138e+07	3.80402e+06
MEDP1430	4	38586.6	35010.5	50852.5	49294.2	28935.7	28400.3	17590.2	7055.87	13157.1	18617.2	14333.4	9952.74	221607	57196.6	140710	70291.7	186084	76788	62863.6	98397.8	74747.7	74913.8	120254	181015
MEDP1432	3	1.28523e+06	956793	2.24244e+06	934595	1.10407e+06	1.05664e+06	2.79622e+06	1.82125e+06	4.48438e+06	5.2491e+06	2.11431e+06	2.94675e+06	33838.2	24471.1	26166.4	31988.2	25475	21641.2	24410.9	43303.9	51375.6	43750.2	29211.4	50265.5
MEDP1422	4	158013	103003	124391	213197	101331	228092	111427	51668	66257.1	249078	118009	74966.8	350460	61690	110938	132752	964223	133028	310918	202728	93041	146515	1.09593e+06	137033
MEDP1427	4	255485	280324	406026	332365	213617	259729	270292	75086.2	98643.1	217298	165431	115472	951922	662981	497668	282090	1.26833e+06	311585	1.47052e+06	1.3751e+06	821691	640125	2.9085e+06	1.04156e+06
MEDP0577	1	3.2184e+08	415550356	3.17283e+08	279441465	1.94683e+08	2.61229e+08	2.5097e+08	1.67274e+08	2.7489e+08	9.0843e+08	4.27551e+08	1.71017e+08	3.10317e+08	3.57187e+08	4.56979e+08	2.83533e+08	5.22452e+08	4.1629e+08	7.84204e+08	3.59155e+08	3.63561e+08	5.49161e+08	840465125	7.23752e+08
MEDP1433	3	4.39054e+06	3.84007e+06	6.32071e+06	4.3491e+06	4.21802e+06	5.62064e+06	8.86373e+06	6.61155e+06	1.46704e+07	1.04011e+07	7.58983e+06	8.01457e+06	1.72679e+06	1.49267e+06	2.6983e+06	2.87656e+06	1.81789e+06	2.16465e+06	1.42298e+06	2.28381e+06	1.91887e+06	2.98935e+06	1.66619e+06	1.55883e+06
MEDP0618	1	2.74202e+08	2.60819e+08	2.09204e+08	2.14458e+08	1.58385e+08	234784724	1.10425e+08	8.73258e+07	1.49061e+08	2.32719e+08	2.39773e+08	8.4716e+07	2.18652e+08	2.39138e+08	2.45426e+08	200464682	1.89795e+08	2.42537e+08	3.73644e+08	4.05924e+08	3.3803e+08	4.24164e+08	3.9258e+08	6.47601e+08
MEDP0523	2	9.47567e+07	8.33855e+07	8.99268e+07	7.90602e+07	7.47216e+07	1.21432e+08	5.78965e+07	6.28334e+07	70028178	4.98865e+07	8.59057e+07	5.51251e+07	3.2564e+07	7.06316e+07	1.22429e+08	1.06361e+08	3.43607e+07	7.38182e+07	6.35065e+07	1.42032e+08	115681242	1.62833e+08	7.08013e+07	1.3042e+08
MEDN0022	3	124170	99655.6	183975	125115	114178	86662.1	91335	275763	64372.7	113113	235902	448166	50739.6	263500	349674	181262	176264	166530	4.22715	4.22715	4.22715	4.22715	4.22715	4.22715
MEDP2554	8	126076	153564	45680.8	174214	12141.2	34613.9	108315	93357.5	62364.8	32055.8	67106.2	49631.8	598652	334182	218716	374294	155798	128245	207320	55275.1	49315.7	51516.7	184434	126409
MEDP2363	9	20363.7	14392.6	25988.7	21956.9	29256.8	32069.2	4971.89	4564.65	2458.33	2664.46	3687.68	7810.06	14106.1	21532.5	16371.2	22450.1	10594.5	13107.4	3871.22	2975.55	3748.64	8744.6	3557.81	3395.07
MEDP2507	9	0.584677	353.754	3058.45	1649.52	2314.86	714.959	250.934	91.8934	177.15	113.756	107.358	148.281	0.584677	0.584677	0.584677	0.584677	0.584677	0.584677	119.275	40.5462	87.8677	71.2185	0.0823805	55.8688
MEDP2568	5	62809	67103	69433.1	42691.2	72852.5	48660	42470.2	45005.7	67807.4	56677.1	54029	67339.8	64881.5	60985.9	110319	77157.5	75858.3	124722	48312.2	29117.8	48206	30119.5	51853.6	47950.7
MEDP2438	5	21471.2	9696.3	19561.7	19627.4	16443	20150.8	1661.1	884.676	1921.12	2337.71	2413.37	1233.04	21658.1	18431.6	40308.5	39942.4	25108.9	28293	4276.13	3324.33	3311.93	2214.88	4292.7	2932.38
MEDP2428	3	82745.9	178707	90913	86286.4	78041.3	111235	612282	125859	215627	69542.1	135589	168519	161112	155708	174769	84358.6	28404.4	67780.5	33523.5	249213	168287	195413	104948	77519.5
MEDP1923	8	1.49762	1.49762	1.49762	1.49762	1.49762	1.49762	3248.24	4236.94	3173.67	5458.13	4273.89	2315.13	8218.06	3756.5	9148.96	9505.84	20524.7	6834.1	6290.1	1865.72	4307.07	3075	9896.53	2599.39
MEDP1924	3	275018	150712	444642	317873	410751	327791	403034	292275	342816	734378	451978	559656	349922	298839	170225	297651	516061	285270	307960	179436	373609	225354	408618	208367
MEDP1919	3	11109.6	16234.3	17753.8	15640.3	13686.9	13351.2	102747	82265.3	88653.6	103086	76979.9	68923.8	119327	68138.1	47568.3	10204.2	2425.98	11198.9	7.09451	33818.3	21213.2	7.09451	27181.6	18921
MEDP1928	7	17674.2	10085.1	7901.38	6304.34	10575.4	14054	146094	59512.8	83486	14030.7	53520	54321.2	78102.3	49442	34650.8	5886.29	10734.3	2838.37	3030.45	197621	83356.1	62769.2	45046	14939.5
MEDN1910	3	4.70507e+06	2.63343e+06	2.10752e+06	1.34025e+06	2.49771e+06	2.74114e+06	3.87022e+06	4.83671e+06	3.38029e+06	4.88799e+06	3.74051e+06	2.65915e+06	1.27681e+06	1.53413e+06	1.61504e+06	1.48722e+06	1.17991e+06	1.70235e+06	1.66703e+06	1.85875e+06	1.69443e+06	1.52158e+06	1.68359e+06	2.17615e+06
MEDP2542	1	3.80939e+06	3.34028e+06	3.63273e+06	3.7574e+06	3.57902e+06	5.76838e+06	13.713	5.38599e+06	5.93132e+06	5.59277e+06	6.76196e+06	5.17434e+06	4.24923e+06	4.78858e+06	4.38198e+06	4.31421e+06	5.32853e+06	4.50636e+06	4.19317e+06	4.92307e+06	4.65511e+06	5.90306e+06	5.38581e+06	5.68046e+06
MEDN1478	5	18421.4	14263	21544.2	13542	15917.1	14953.1	9382.58	10591.7	11363.2	1.84704	4955.35	9263.6	29398	31691	33005.3	42156	35279.1	35952.8	15117.7	12918.6	1.84704	9160.82	2052.97	8613.29
MEDP1671	4	1531.68	1207.46	1014.57	2142.04	1607.73	386.392	227.11	147.603	324.407	885.549	322.191	294.856	8185.73	868.536	965.55	2113.06	1341.05	2299.72	772.803	1125.85	462.446	258.757	8288.48	435.033
MEDP2355	3	1.36568e+06	1.04295e+06	1.18235e+06	1.10971e+06	1.18152e+06	1.13055e+06	3.05942e+06	2.46487e+06	2.44476e+06	2.94605e+06	3.38519e+06	3.77728e+06	1.68316e+06	2.59187e+06	3.01041e+06	2.76059e+06	1.86799e+06	3.23302e+06	1.48387e+06	2.04103e+06	1.67844e+06	1.81621e+06	2.26521e+06	1.99901e+06
MEDP2325	8	0.244047	0.244047	0.244047	0.244047	0.244047	0.244047	194.213	17.2147	111.143	71.7866	29.4338	116.076	0.244047	274.283	219.436	304.688	0.244047	555.899	77.5602	14.8029	112.803	13.78	21.6343	63.3503
MEDP2394	6	1252.61	0.427362	3161.78	1863.98	2127.48	560.237	1216.52	323.735	1945.99	1487.27	978.834	1989.28	0.427362	0.427362	0.427362	0.427362	0.427362	0.427362	137.154	154.528	70.2488	143.845	177.266	120.523
MEDP2597	5	2084.92	547.379	3355.97	1803.93	1390.71	3107.92	905.88	730.395	608.677	717.506	777.722	1245.71	5265.8	1139.81	3500.45	1186.31	543.008	2984.01	1722.57	960.305	1231.15	778.529	947.346	1424.72
MEDP1862	5	5406.58	6116.08	23287	5583.08	3610.32	8931.78	5339.96	4661.38	4600.09	7587.49	8192.63	8954.87	6725.81	2839.8	10110.2	8422.17	16379.1	12089.4	5555.43	8794.95	6010.75	5642.87	7589.58	5901.46
MEDP2313	6	1.04481e+07	1.05458e+07	1.43151e+07	1.00323e+07	1.08024e+07	1.09518e+07	1.00206e+07	1.22019e+07	1.27068e+07	1.37277e+07	1.33141e+07	1.03063e+07	7.21409e+06	4.3303e+06	7.65855e+06	8.0112e+06	8.16973e+06	6.71592e+06	6.67961e+06	1.27639e+07	1.19752e+07	1.33297e+07	1.1001e+07	1.00976e+07
MEDP1670	5	1565.91	0.673987	4930.04	1749.68	2353.28	2205.63	452.948	515.61	504.703	0.128862	0.128862	659.319	7217.8	3474.99	2081.59	0.673987	4938.47	1711.31	1083.78	0.128862	335.069	0.128862	952.83	264.633
MEDP1790	8	0.200594	0.200594	0.200594	0.200594	0.200594	0.200594	244.331	204.803	160.08	143.365	140.218	412.72	2268.62	834.087	414.31	315.282	942.045	595.318	1033.87	56.1745	128.666	215.91	188.684	98.4872
MEDP2312	7	1.46924e+07	1.61609e+07	2.02286e+07	1.72084e+07	16987387	1.64407e+07	1.73925e+07	1.85951e+07	1.86771e+07	2.19084e+07	2.00646e+07	1.51817e+07	7.57442e+06	8.21809e+06	1.19952e+07	1.16179e+07	1.16181e+07	1.12121e+07	1.01784e+07	2.08398e+07	1.81603e+07	2.04355e+07	1.94462e+07	1.70481e+07
MEDP2335	8	25402.8	48569.5	35789.6	38355.6	48582.9	29633	141717	110924	166952	140573	165852	191083	182693	147044	161808	300183	90434.5	272095	88648.2	125202	157055	170243	159279	154629
MEDN1912	8	1611.31	3237.99	5.2167	2389.5	1038.97	1363.1	2.0464	2.0464	2.0464	2.0464	2.0464	2.0464	14656.5	6623.78	7095.22	10744.6	6859.85	3632.74	5377.08	1743.33	2359.68	1958.1	5827.88	2324.63
MEDP2350	5	4003.68	739.42	4943.01	0.799667	646.958	1929.35	374.093	491.446	0.251961	378.475	230.555	1685.4	2901.42	3308.8	1956.01	6171.8	6556.54	2517.67	0.248102	0.24648	0.250658	0.25551	0.253126	0.258637
MEDN2117	1	636139	293549	245901	308300	315630	289932	433808	408905	321161	271612	787352	262459	271533	435169	260655	348667	308226	378018	738775	415695	398100	386830	370062	441604
MEDP2352	9	2791.09	6005.85	6364.2	2791.64	7713.63	6046.11	2484	2187.46	2163.42	2115.96	1827.25	1978.51	2733.83	5565.21	2940.13	2240.86	841.103	4979.47	1215.21	492.939	634.154	660.541	533.518	0.213776
MEDP1935	5	21471.2	9696.3	19561.7	19627.4	16443	20150.8	1661.1	884.676	1921.12	2337.71	2413.37	1233.04	21658.1	18431.6	40308.5	39942.4	25108.9	28293	4276.13	3324.33	3311.93	2214.88	4292.7	2932.38
MEDP2392	6	1252.61	0.427362	3161.78	1863.98	2127.48	560.237	1216.52	323.735	1945.99	1487.27	978.834	1989.28	0.427362	0.427362	0.427362	0.427362	0.427362	0.427362	137.154	154.528	70.2488	143.845	177.266	120.523
MEDP2452	5	334300	366352	388748	346435	250645	398627	13659.7	19140.1	14595.3	13117.9	10561.9	17127.8	340993	267997	314103	172537	310371	198963	11990.4	8776.95	12807.8	2.29349	22275.4	7875.32
MEDP2453	7	25.054	26.069	29.4478	15.4156	17.1514	13.4628	822.788	1885.84	845.063	1723.56	1088.91	1363.46	46.8893	44.0738	30.768	24.404	90.6682	29.2988	0.286759	1479.08	2110.53	899.885	1746.98	717.239
MEDP2467	3	4.00875	4.00875	4.00875	4.00875	4.00875	4.00875	29592.7	34094.3	20255.1	24921.8	26559.1	21676.5	13732.4	4.00875	25741.8	6914.64	14617	7327.94	0.9531	0.9531	0.9531	0.9531	0.9531	0.9531
MEDP1776	5	1931.62	1833.45	2618.67	2338.57	5785.08	2075.01	1089.57	616.481	562.447	405.889	699.555	288.204	1856.6	6144.46	7454.92	5620.38	22407.1	5812.41	314.739	0.151425	160.074	0.151425	329.48	50.012
MEDP2592	9	2791.09	6005.85	6364.2	2791.64	7713.63	6046.11	2484	2187.46	2163.42	2115.96	1827.25	1978.51	2733.83	5565.21	2940.13	2240.86	841.103	4979.47	1215.21	492.939	634.154	660.541	533.518	0.213776
MEDP2504	8	0.574557	0.574557	0.574557	0.574557	0.574557	0.574557	953.55	265.921	690.777	623.759	449.698	1490.31	714.085	1277.37	499.966	443.618	1298.53	0.574557	817.8	0.57344	0.646757	340.536	2190.79	678.883
MEDP2393	6	1252.61	0.427362	3161.78	1863.98	2127.48	560.237	1216.52	323.735	1945.99	1487.27	978.834	1989.28	0.427362	0.427362	0.427362	0.427362	0.427362	0.427362	137.154	154.528	70.2488	143.845	177.266	120.523
MEDP2307	7	25.054	26.069	29.4478	15.4156	17.1514	13.4628	822.788	1885.84	845.063	1723.56	1088.91	1363.46	46.8893	44.0738	30.768	24.404	90.6682	29.2988	0.286759	1479.08	2110.53	899.885	1746.98	717.239
MEDP1683	5	547.022	2723.65	1073.92	2998.9	1891.41	1437.2	399.166	638.898	717.463	259.463	540.303	522.953	3696.83	2825.8	1485.87	1465.19	1800.23	1061.33	0.196396	0.196396	0.196396	0.196396	0.196396	0.196396
MEDP1873	3	60394.6	57853.4	95115.5	59041.1	69059.5	38090	611154	286790	292412	506950	284223	1.70202e+06	874811	416803	124251	321792	421706	607947	76828.4	132659	35889.9	21330.8	35484.1	20817.1
MEDP2466	3	5.9796	5.9796	5.9796	5.9796	5.9796	5.9796	31414.1	41956.6	22022.3	27617.2	30895.2	29079.1	15438.5	40300.9	47938.4	10509.6	24874.6	14390	1.04633	1.04633	1.04633	1.04633	1.04633	1.04633
MEDP1506	8	0.00462001	0.00462001	0.00462001	0.00462001	0.00462001	0.00462001	9.43181	0.00475654	0.00475654	6.1282	6.54169	7.61355	41.1135	29.4002	15.0702	25.4663	58.8207	17.9314	10.79	7.37778	6.54263	5.81572	23.6706	6.18516
MEDP2549	4	2.54694e+06	2.13361e+06	1.91193e+06	1.90528e+06	1.89994e+06	2.35336e+06	1.93276e+06	1.35425e+06	2.83903e+06	2.52642e+06	1.59352e+06	1.68014e+06	4.68136e+06	3.23738e+06	5.98993e+06	2.92901e+06	4.91413e+06	2.86314e+06	3.29613e+06	3.54474e+06	2.78235e+06	2.94723e+06	4.58772e+06	4.29596e+06
MEDP2578	5	23698.4	29761.5	20063	22096.6	24157	24139.8	3825.86	6644.5	5578.66	7909.33	9173.51	6779.87	46938.6	51036.9	28652.8	24193.5	25745.3	27317.3	6775.04	12750.1	7259.35	5211.48	9570.43	3583.08
MEDP2371	5	2.68439e+06	935517	3.02834e+06	2.18301e+06	2.99896e+06	1.77096e+06	1.32623e+06	575893	1.178e+06	1.02822e+06	1.41159e+06	1.15309e+06	2.48371e+06	4.24788e+06	1.86903e+06	539318	539008	2.57085e+06	439022	325585	385037	290322	298639	468846
MEDP2318	8	24982	18924.8	17912.7	4823.94	5305.46	23143.6	22424.4	12131.2	11582.1	15497.8	14431.3	13781.5	31295.2	49599.7	49593	23776.5	8200.18	37362.2	20412.3	16455	16402.9	20079.2	36812.2	18173.2
MEDP2605	6	142266	112640	92948	164665	85842.5	120910	58039.5	30062.8	53703.2	59539.4	72407.4	51820.5	12213	21261.4	10683.5	12570.2	21499.8	22601.2	39030.2	4911.41	16861.2	17403.4	29340.3	25222.2
MEDN1950	3	66645.6	51373.4	81075	18187.3	25688.3	75992.8	263330	933673	230894	125570	935750	687641	59500.2	24619.2	100804	411324	96633.6	49737.1	109147	54677.1	22.1785	31152.5	66890.1	32183
MEDP2589	8	0.184056	0.184056	0.184056	0.184056	0.184056	0.184056	0.0245567	0.0245567	0.0245567	0.0245567	0.0245567	0.0245567	600.652	277.91	101.576	227.414	422.517	954.876	111.701	3.67266	138.825	0.0245567	31.356	8.70663
MEDN1985	5	5325.57	5854.68	5324.81	2257.59	6570.32	3555.75	1372.91	2202.83	1094.18	901.374	1172.01	1144.56	7818.12	6026.65	2525.94	5339.99	5564	4798.66	2582.24	2347.52	2143.15	2145.97	1745.72	1442.42
MEDP1913	8	16943.5	18164.7	24921.6	16577.2	18043.5	10980.1	21127.7	11482.5	19095.1	19812.9	9395.76	11482.5	40492.7	41848.1	33170.1	35332.4	115946	36778.4	18105.3	12229.8	14950.3	9223.55	39031.7	22530.8
MEDP2565	8	4.87724	4.87724	4.87724	4.87724	4.87724	4.87724	1532.23	2356.55	2271.97	1708.04	1880.68	1892.36	81406.9	36384.6	41935.7	29977.6	23388.3	17667.8	2813.43	3431.8	5072.22	2684.97	483.972	9040.02
MEDP1667	5	2084.92	547.379	3355.97	1803.93	1390.71	3107.92	905.88	730.395	608.677	717.506	777.722	1245.71	5265.8	1139.81	3500.45	1186.31	543.008	2984.01	1722.57	960.305	1231.15	778.529	947.346	1424.72
MEDP2431	6	31299.3	2.64309	64987.7	42374.8	2.64309	12029.2	24108.9	21200.3	24619.1	27844.1	16155.2	71604.8	2.64309	2.64309	2.64309	2.64309	2.64309	2.64309	1.42556	1.42556	1.42556	1.42556	1.42556	1.42556
MEDP2584	5	2583.93	304.774	1925.3	4374.93	4252.27	2105.74	412.862	26.565	121.771	90.4951	74.744	404.58	2243.51	955.322	1120.67	1361.03	4917.28	1956.63	978.931	319.004	388.021	222.509	883.409	240.145
MEDP1512	9	10083.5	4295.73	13960.4	6534.05	2087.26	2375.07	3718.79	954.578	1093.75	425.975	628.168	1011.39	15202.4	1483.33	1641.03	387.033	688.046	1528.44	1068.44	620.788	532.206	249.962	783.468	341.392
MEDP2567	5	2290.11	1411.28	1943.98	586.799	2269.53	952.602	1048.81	543.514	745.675	1515.48	916.434	1520.3	2348.81	2974.75	1236.27	958.544	0.220789	2350.68	1218.54	546.742	745.35	1193.63	1202.32	948.683
MEDP2358	5	33205.1	35801.9	18848.3	20298.1	15368.8	20032.9	26140.2	12659.3	28804	19454.2	16312.9	13589.2	16179.2	28485.1	20589.3	38775.5	45747.8	25013	9604.83	11442.9	10468	7306.24	15284.4	12598.4
MEDP1885	7	106728	108215	99645.4	111509	124239	67924.8	879736	498729	764846	319650	429772	418005	275022	160674	128309	23573.4	11149.8	30987.6	8099.57	656135	333366	204358	259884	112623
MEDP2339	4	217980	270567	390879	189787	117250	266196	150727	161294	193563	338137	168989	215267	452525	692048	1.29652e+06	695523	101037	903505	1.35777e+06	501194	738299	402052	258328	824546
MEDP2398	5	28352.5	36195.5	59251.7	50969.4	43475.6	30225.7	4528.98	2630.44	1981.63	2923.68	3382.32	5356.73	40924.4	13897.3	22332.5	23739.2	674488	29716.3	5763.57	1474.28	0.655582	2326.74	9971.47	1845.66
MEDP2560	8	12309.2	9381.89	9363.32	9247.88	11334.5	6867.09	6579.59	6393.11	5848.18	8056.66	8810.28	9940.88	24409.9	18339.1	7704.14	23698.4	15125	20691.5	9266.13	8640.37	8301.62	8132.41	27051.7	16514.4
MEDP1889	5	2783.83	803.95	579.356	0.551452	0.551452	803.373	851.975	1435.02	1008.8	742.919	952.437	376.34	2883.67	2117.42	951.276	2202.49	2485.7	2905.9	362.398	0.179158	345.583	265.632	262.757	349.466
MEDP2367	4	146290	258561	280531	130697	87888.3	206793	201321	134619	184589	205038	188459	170277	318814	464155	1.02022e+06	590483	151806	765022	1.04751e+06	449246	675761	474670	269333	629570
MEDP2378	6	3.67268e+06	4.06807e+06	3.42786e+06	3.41759e+06	3.71189e+06	4.04907e+06	2.27428e+06	2.18473e+06	2.85386e+06	5.64605e+06	3.80622e+06	1.64538e+06	1.64056e+06	1.53433e+06	1.80753e+06	2.76166e+06	3.08072e+06	2.43954e+06	2.30752e+06	3.20447e+06	2.59064e+06	2.84444e+06	3.10495e+06	3.62969e+06
MEDP2494	1	118638	178886	124879	105700	133204	120696	299813	237800	192745	227907	201911	229232	327533	242406	297706	222739	210251	119934	295577	284576	263227	245656	227826	296396
MEDP2416	8	0.0575218	0.0575218	0.0575218	0.0575218	0.0575218	0.0575218	38.1769	28.5039	18.8082	29.0321	88.3672	81.2331	132.536	156.563	189.292	115.378	251.004	98.0104	0.0466855	0.0466855	0.0466855	0.0466855	0.0466855	0.0466855
MEDP1912	8	0.0575218	0.0575218	0.0575218	0.0575218	0.0575218	0.0575218	38.1769	28.5039	18.8082	29.0321	88.3672	81.2331	132.536	156.563	189.292	115.378	251.004	98.0104	0.0466855	0.0466855	0.0466855	0.0466855	0.0466855	0.0466855
MEDP1022	5	2583.93	304.774	1925.3	4374.93	4252.27	2105.74	412.862	26.565	121.771	90.4951	74.744	404.58	2243.51	955.322	1120.67	1361.03	4917.28	1956.63	978.931	319.004	388.021	222.509	883.409	240.145
MEDP2463	4	21265.6	38690.3	73741.9	32129.4	34378.3	41021	19957.3	5293.02	21049.3	13516.3	37873.5	23584.4	54809	73975.4	19580.2	46103.8	115789	17017.3	103183	11956.3	62355.9	43813	66953.4	22027.4
MEDP2575	8	7062.61	2.50006	7217.15	3173.36	8232.4	5176.74	1881.26	941.971	0.601445	1492.41	2944.68	1445.14	33601	41368.5	111932	55420.9	98318.8	93271	14992	6076.6	5746.88	7776.65	12958.7	37782
MEDP2385	8	3.51685	3.51685	3.51685	3.51671	3.51685	3.51685	1106.63	1446.23	1552.93	2051.72	2389.04	2750.43	27984	41473.5	45142.1	50421.2	16690	19473.2	13026.9	4888.05	7680.53	6813.7	1982.34	4904.13
MEDP2388	3	113625	151772	124231	160486	163576	203241	171360	170640	194412	114200	257199	167273	91248.6	103881	198162	206080	74163.9	138015	108164	120448	123773	121388	123268	90076.4
MEDP2391	9	2341.21	2340.48	2765.41	3015.78	2464.24	3148.03	308.684	174.232	364.155	321.188	517.891	227.32	1.01964	1.01964	1.01964	1.01964	1.01964	1.01964	828.261	340.938	227.142	813.98	842.489	740.064
MEDP2566	5	17100.8	2776.88	10694.9	9576.61	6220.37	3907.17	2574.16	2646.08	1140.33	1943.56	2249.29	3651.8	11328.8	12171.7	25431.4	5825.06	14665.5	16448.2	2920.68	1336.16	1661.79	3455.27	7626.03	1580.87
MEDN2006	8	610.802	572.184	1134.4	329.913	403.814	683.352	1134.22	438.058	544.953	523.023	207.851	1636.63	8063.22	2143.55	790.92	1291.45	1782.98	2880.14	2782.5	107.858	1225.94	90.3798	373.632	141.915
MEDP1894	8	5336.09	5651.04	15224.6	5908.96	6380.07	4331.51	16380.3	7980.6	9553.35	9435.35	4775.27	26324.1	144459	32971.4	10583	14637.8	19226.2	44020	58475.8	1563.4	23008.3	1829.48	5744.52	2743.45
MEDP2430	1	6703.92	5678.26	20291.4	11585.6	12709.7	4570.67	32225	8911.66	13555	19654.8	13727.9	30817.2	32144.6	14405.1	9571.78	13859.7	105170	18335.5	96581.8	11011.7	89104.3	11557.1	179801	21015.2
MEDP2383	5	21392.3	29279.4	17340.1	7432.65	32894.4	21169.5	11733.4	6099.38	2958.11	4896.38	16241.9	15141	3447.33	71111.4	202986	38745.2	16212.4	58835	2.8093	2.8093	3876.8	6798.78	9954.6	31051.9
MEDP2432	5	489.422	308.242	1051.31	174.311	1157.58	508.09	226.118	182.169	135.214	57.7561	57.7415	302.642	946.887	695.779	313.098	920.807	458.232	736.321	821.084	76.0572	427.507	57.7271	129.847	138.909
MEDN1548	5	2.92147e+06	3.13479e+06	2.83184e+06	2.79721e+06	2.90178e+06	2.92758e+06	2.11885e+06	2.10085e+06	2.0984e+06	1.99049e+06	2.03466e+06	1.98604e+06	3.45503e+06	3.0331e+06	2.98444e+06	3.18208e+06	3.46153e+06	3.08317e+06	1.7248e+06	2.07386e+06	1.84854e+06	1.94233e+06	2.03112e+06	2.00206e+06
[truncated: 147 more rows]

## Sheet: S4
Table S4. The results of differential metabolite screening between GMMs and SMM.
[truncated: 171 more rows]

## Sheet: ST5
Table S5. The results of differential metabolite screening between GMMs and CMMs.
[truncated: 257 more rows]

[truncated: 4 more sheets: ST6, ST7, ST8, ST9]
